# Supplementary material for: Exploring causality in the association between gut microbiota and irritable bowel syndrome risk: a large Mendelian randomization study
Source: Aging (Albany NY). 2024 Apr 25;16(8):7448–59. doi: 10.18632/aging.205771 (PMC11087118; doi:10.18632/aging.205771)
Supplement: Supplementary Table 1 [file aging-16-205771-s002.xlsx]

## Sheet: Sheet1
Supplementary Table 1. The information of instrumental variables for 211 gut microbiome.
Gut microbiome	chr.exposure	pos.exposure	beta.exposure	se.exposure	pval.exposure	samplesize.exposure	id.exposure	SNP	effect_allele.exposure	other_allele.exposure	eaf.exposure	exposure	mr_keep.exposure	pval_origin.exposure	data_source.exposure	F Value
	12	20378911	0.0583765	0.0123353	2.59358e-06	14306	ebi-a-GCST90016908	rs10841473	C	G	0.7296	|| id:ebi-a-GCST90016908	TRUE	reported	igd	22.3963
	17	75348675	0.0560674	0.0124286	5.92516e-06	14306	ebi-a-GCST90016908	rs11655079	C	T	0.7505	|| id:ebi-a-GCST90016908	TRUE	reported	igd	20.3506
	5	475408	0.0563759	0.0115529	1.58132e-06	14306	ebi-a-GCST90016908	rs11745923	G	T	0.3966	|| id:ebi-a-GCST90016908	TRUE	reported	igd	23.8125
	1	114665485	0.0510452	0.0114325	8.62621e-06	14306	ebi-a-GCST90016908	rs12049045	A	G	0.3817	|| id:ebi-a-GCST90016908	TRUE	reported	igd	19.9355
	15	49208992	0.0719923	0.0154661	4.02819e-06	14306	ebi-a-GCST90016908	rs12899991	A	T	0.16	|| id:ebi-a-GCST90016908	TRUE	reported	igd	21.6676
	22	35567355	0.111877	0.023501	1.50428e-06	14306	ebi-a-GCST90016908	rs134366	G	A	0.0596	|| id:ebi-a-GCST90016908	TRUE	reported	igd	22.6626
class Actinobacteria id.419	2	161611969	0.0509242	0.0112503	6.71382e-06	14306	ebi-a-GCST90016908	rs1376754	G	A	0.4702	|| id:ebi-a-GCST90016908	TRUE	reported	igd	20.489
	10	126110032	0.0762317	0.0169884	4.96364e-06	14306	ebi-a-GCST90016908	rs1515761	T	C	0.1332	|| id:ebi-a-GCST90016908	TRUE	reported	igd	20.1357
	2	136616754	0.111489	0.012066	3.78966e-20	14306	ebi-a-GCST90016908	rs182549	C	T	0.4911	|| id:ebi-a-GCST90016908	TRUE	reported	igd	85.3763
	2	137602926	0.0602969	0.0126047	1.75235e-06	14306	ebi-a-GCST90016908	rs1961273	C	T	0.2714	|| id:ebi-a-GCST90016908	TRUE	reported	igd	22.8836
	11	71221248	0.0540741	0.0121393	5.39237e-06	14306	ebi-a-GCST90016908	rs4945008	A	G	0.3002	|| id:ebi-a-GCST90016908	TRUE	reported	igd	19.8423
	1	207003553	0.0711483	0.0134495	1.10652e-07	14306	ebi-a-GCST90016908	rs6660520	A	G	0.2147	|| id:ebi-a-GCST90016908	TRUE	reported	igd	27.9845
	15	94852795	0.126352	0.0273626	2.56803e-06	14306	ebi-a-GCST90016908	rs72767435	C	T	0.9324	|| id:ebi-a-GCST90016908	TRUE	reported	igd	21.3231
	13	112859829	0.0944467	0.0192976	6.20798e-07	14306	ebi-a-GCST90016908	rs7322849	T	C	0.0964	|| id:ebi-a-GCST90016908	TRUE	reported	igd	23.9534
	5	18019549	0.0769653	0.0173933	8.62144e-06	14306	ebi-a-GCST90016908	rs7700479	A	T	0.9205	|| id:ebi-a-GCST90016908	TRUE	reported	igd	19.5806
	8	65654844	0.155784	0.0348017	8.62105e-06	14306	ebi-a-GCST90016908	rs80083040	T	G	0.0517	|| id:ebi-a-GCST90016908	TRUE	reported	igd	20.0376
	16	81776768	0.0575816	0.0116762	8.3372e-07	14306	ebi-a-GCST90016908	rs8047955	A	G	0.3519	|| id:ebi-a-GCST90016908	TRUE	reported	igd	24.32
	6	14617591	0.0509553	0.011539	8.92237e-06	14306	ebi-a-GCST90016908	rs857444	C	T	0.3608	|| id:ebi-a-GCST90016908	TRUE	reported	igd	19.5003
	7	95654718	0.0501255	0.011255	8.67601e-06	14306	ebi-a-GCST90016908	rs961091	G	A	0.4334	|| id:ebi-a-GCST90016908	TRUE	reported	igd	19.8347
	chr.exposure	pos.exposure	beta.exposure	se.exposure	pval.exposure	samplesize.exposure	id.exposure	SNP	effect_allele.exposure	other_allele.exposure	eaf.exposure	exposure	mr_keep.exposure	pval_origin.exposure	data_source.exposure	F Value
	1	14238305	0.0692742	0.0148866	3.55435e-06	14306	ebi-a-GCST90016909	rs10803434	T	A	0.5487	|| id:ebi-a-GCST90016909	TRUE	reported	igd	21.6547
	19	28641647	0.0690234	0.0153829	7.14184e-06	14306	ebi-a-GCST90016909	rs12977163	G	C	0.3678	|| id:ebi-a-GCST90016909	TRUE	reported	igd	20.1334
	9	95517807	0.160677	0.0317708	6.20369e-07	14306	ebi-a-GCST90016909	rs140912403	T	C	0.9354	|| id:ebi-a-GCST90016909	TRUE	reported	igd	25.5771
	3	59982336	0.0927341	0.0207569	9.33254e-06	14306	ebi-a-GCST90016909	rs17061716	G	C	0.1372	|| id:ebi-a-GCST90016909	TRUE	reported	igd	19.9597
class Alphaproteobacteria	2	75630344	0.0705145	0.0157564	7.37921e-06	14306	ebi-a-GCST90016909	rs34569731	A	G	0.335	|| id:ebi-a-GCST90016909	TRUE	reported	igd	20.0282
	3	84471266	0.080811	0.0184159	7.53633e-06	14306	ebi-a-GCST90016909	rs55876211	T	C	0.828	|| id:ebi-a-GCST90016909	TRUE	reported	igd	19.2555
	3	176407911	0.0805256	0.0180912	9.75933e-06	14306	ebi-a-GCST90016909	rs62285697	C	T	0.1998	|| id:ebi-a-GCST90016909	TRUE	reported	igd	19.8122
	2	169033340	0.133271	0.0267738	5.09143e-07	14306	ebi-a-GCST90016909	rs76784716	A	G	0.0716	|| id:ebi-a-GCST90016909	TRUE	reported	igd	24.7771
	12	89471235	0.0969489	0.0215149	8.84301e-06	14306	ebi-a-GCST90016909	rs7960664	G	A	0.1511	|| id:ebi-a-GCST90016909	TRUE	reported	igd	20.3052
	3	13726736	0.0751277	0.0153867	1.05334e-06	14306	ebi-a-GCST90016909	rs9813022	G	A	0.6978	|| id:ebi-a-GCST90016909	TRUE	reported	igd	23.8402
	chr.exposure	pos.exposure	beta.exposure	se.exposure	pval.exposure	samplesize.exposure	id.exposure	SNP	effect_allele.exposure	other_allele.exposure	eaf.exposure	exposure	mr_keep.exposure	pval_origin.exposure	data_source.exposure	F Value
	12	100585559	0.101189	0.0217379	4.85445e-06	14306	ebi-a-GCST90016910	rs11110282	G	A	0.9324	|| id:ebi-a-GCST90016910	TRUE	reported	igd	21.6686
	4	184681021	0.128032	0.0286921	9.12809e-06	14306	ebi-a-GCST90016910	rs111552159	C	G	0.0636	|| id:ebi-a-GCST90016910	TRUE	reported	igd	19.9119
	4	98049499	0.0630747	0.0128717	1.96024e-06	14306	ebi-a-GCST90016910	rs11730038	A	G	0.7594	|| id:ebi-a-GCST90016910	TRUE	reported	igd	24.0126
	11	8332350	0.0572158	0.0126793	7.21174e-06	14306	ebi-a-GCST90016910	rs12797734	T	C	0.2525	|| id:ebi-a-GCST90016910	TRUE	reported	igd	20.363
	3	64398863	0.0601035	0.0136407	9.53038e-06	14306	ebi-a-GCST90016910	rs13068444	A	G	0.1928	|| id:ebi-a-GCST90016910	TRUE	reported	igd	19.4145
	2	231723657	0.0476864	0.0108547	7.97389e-06	14306	ebi-a-GCST90016910	rs1595463	C	A	0.4871	|| id:ebi-a-GCST90016910	TRUE	reported	igd	19.2998
	3	4800550	0.0554219	0.0114789	1.38433e-06	14306	ebi-a-GCST90016910	rs1962325	C	G	0.3191	|| id:ebi-a-GCST90016910	TRUE	reported	igd	23.3111
class Bacilli id.1673	9	101101172	0.0613034	0.0137579	7.81196e-06	14306	ebi-a-GCST90016910	rs28564647	G	T	0.7942	|| id:ebi-a-GCST90016910	TRUE	reported	igd	19.8548
	8	10143164	0.0598868	0.0123903	1.07895e-06	14306	ebi-a-GCST90016910	rs2952251	G	A	0.7475	|| id:ebi-a-GCST90016910	TRUE	reported	igd	23.3614
	19	51959855	0.111056	0.0246039	6.54591e-06	14306	ebi-a-GCST90016910	rs34989881	A	G	0.0656	|| id:ebi-a-GCST90016910	TRUE	reported	igd	20.374
	16	991253	0.0619529	0.0127066	1.01499e-06	14306	ebi-a-GCST90016910	rs35344081	G	A	0.2406	|| id:ebi-a-GCST90016910	TRUE	reported	igd	23.7719
	17	40835649	0.0520614	0.0109842	2.2076e-06	14306	ebi-a-GCST90016910	rs4028634	T	C	0.4254	|| id:ebi-a-GCST90016910	TRUE	reported	igd	22.4644
	4	7431487	0.0535854	0.0116362	4.29833e-06	14306	ebi-a-GCST90016910	rs4459992	T	C	0.3201	|| id:ebi-a-GCST90016910	TRUE	reported	igd	21.2066
	1	200418805	0.0714773	0.0146647	9.21977e-07	14306	ebi-a-GCST90016910	rs57872228	T	C	0.829	|| id:ebi-a-GCST90016910	TRUE	reported	igd	23.7569
	15	58738075	0.081146	0.0180042	7.59591e-06	14306	ebi-a-GCST90016910	rs694949	G	A	0.8777	|| id:ebi-a-GCST90016910	TRUE	reported	igd	20.3136
	6	67570929	0.104496	0.0217083	1.52753e-06	14306	ebi-a-GCST90016910	rs74352383	A	T	0.9056	|| id:ebi-a-GCST90016910	TRUE	reported	igd	23.1712
	3	184371224	0.0979154	0.0224074	8.45688e-06	14306	ebi-a-GCST90016910	rs74663707	C	T	0.0726	|| id:ebi-a-GCST90016910	TRUE	reported	igd	19.095
	4	151687420	0.104044	0.0247934	8.46837e-06	14306	ebi-a-GCST90016910	rs7666190	A	C	0.9374	|| id:ebi-a-GCST90016910	TRUE	reported	igd	17.6101
	3	94153993	0.156331	0.0325945	1.07251e-06	14306	ebi-a-GCST90016910	rs76717940	T	A	0.0606	|| id:ebi-a-GCST90016910	TRUE	reported	igd	23.0039
	5	174173171	0.107255	0.0222879	1.33773e-06	14306	ebi-a-GCST90016910	rs77558518	G	A	0.9354	|| id:ebi-a-GCST90016910	TRUE	reported	igd	23.1578
	7	36349586	0.108007	0.0232858	1.06891e-06	14306	ebi-a-GCST90016910	rs78938557	T	C	0.0676	|| id:ebi-a-GCST90016910	TRUE	reported	igd	21.514
	13	24973509	0.225309	0.0467697	1.79457e-06	14306	ebi-a-GCST90016910	rs9581006	C	T	0.0457	|| id:ebi-a-GCST90016910	TRUE	reported	igd	23.2075
	chr.exposure	pos.exposure	beta.exposure	se.exposure	pval.exposure	samplesize.exposure	id.exposure	SNP	effect_allele.exposure	other_allele.exposure	eaf.exposure	exposure	mr_keep.exposure	pval_origin.exposure	data_source.exposure	F Value
	10	39062269	0.0473596	0.010541	7.08223e-06	14306	ebi-a-GCST90016911	rs11146701	A	G	0.4254	|| id:ebi-a-GCST90016911	TRUE	reported	igd	20.1861
	14	59317502	0.102648	0.0213843	9.23996e-07	14306	ebi-a-GCST90016911	rs111845179	T	C	0.0616	|| id:ebi-a-GCST90016911	TRUE	reported	igd	23.0415
	9	116888284	0.0689676	0.0148765	3.74576e-06	14306	ebi-a-GCST90016911	rs13291169	C	G	0.16	|| id:ebi-a-GCST90016911	TRUE	reported	igd	21.4926
	22	27433885	0.0552057	0.0120278	8.3593e-06	14306	ebi-a-GCST90016911	rs17343978	C	A	0.7396	|| id:ebi-a-GCST90016911	TRUE	reported	igd	21.0666
	2	53831026	0.0508393	0.0106807	1.91509e-06	14306	ebi-a-GCST90016911	rs2032750	C	T	0.5487	|| id:ebi-a-GCST90016911	TRUE	reported	igd	22.6569
	1	200112563	0.222741	0.0508055	9.93482e-06	14306	ebi-a-GCST90016911	rs2363574	T	C	0.9682	|| id:ebi-a-GCST90016911	TRUE	reported	igd	19.2211
	2	213189994	0.107377	0.0245661	8.76436e-06	14306	ebi-a-GCST90016911	rs4146051	G	A	0.9443	|| id:ebi-a-GCST90016911	TRUE	reported	igd	19.1051
Bacteroidia id.912	3	195936789	0.0466729	0.0105312	8.4711e-06	14306	ebi-a-GCST90016911	rs4916508	A	G	0.5646	|| id:ebi-a-GCST90016911	TRUE	reported	igd	19.6415
	13	70523029	0.121514	0.0236759	3.89583e-07	14306	ebi-a-GCST90016911	rs55773148	A	G	0.9473	|| id:ebi-a-GCST90016911	TRUE	reported	igd	26.3414
	8	70916181	0.0655728	0.0149891	9.08657e-06	14306	ebi-a-GCST90016911	rs62531359	T	G	0.1451	|| id:ebi-a-GCST90016911	TRUE	reported	igd	19.138
	9	136493820	0.140055	0.0311128	7.06122e-06	14306	ebi-a-GCST90016911	rs62575403	C	T	0.0437	|| id:ebi-a-GCST90016911	TRUE	reported	igd	20.2637
	1	157495438	0.22241	0.0493458	7.65526e-06	14306	ebi-a-GCST90016911	rs72706335	C	T	0.9344	|| id:ebi-a-GCST90016911	TRUE	reported	igd	20.3146
	17	6461200	0.207018	0.0442633	1.21616e-06	14306	ebi-a-GCST90016911	rs73975615	A	G	0.9891	|| id:ebi-a-GCST90016911	TRUE	reported	igd	21.874
	1	176792690	0.0567113	0.0118386	1.54814e-06	14306	ebi-a-GCST90016911	rs7546249	A	T	0.7545	|| id:ebi-a-GCST90016911	TRUE	reported	igd	22.9477
	3	89339527	0.0645771	0.0132957	8.36778e-07	14306	ebi-a-GCST90016911	rs7631304	A	G	0.83	|| id:ebi-a-GCST90016911	TRUE	reported	igd	23.5904
	8	13110185	0.0646823	0.0149628	9.98596e-06	14306	ebi-a-GCST90016911	rs79585701	A	C	0.1292	|| id:ebi-a-GCST90016911	TRUE	reported	igd	18.6872
	16	74290641	0.0548532	0.012153	4.7338e-06	14306	ebi-a-GCST90016911	rs929878	T	C	0.7555	|| id:ebi-a-GCST90016911	TRUE	reported	igd	20.3722
	chr.exposure	pos.exposure	beta.exposure	se.exposure	pval.exposure	samplesize.exposure	id.exposure	SNP	effect_allele.exposure	other_allele.exposure	eaf.exposure	exposure	mr_keep.exposure	pval_origin.exposure	data_source.exposure	F Value
	3	70592215	0.0592944	0.0128769	3.67147e-06	14306	ebi-a-GCST90016912	rs11128180	A	G	0.2237	|| id:ebi-a-GCST90016912	TRUE	reported	igd	21.2034
	2	239888758	0.0641363	0.0131766	1.09863e-06	14306	ebi-a-GCST90016912	rs12467854	G	C	0.2078	|| id:ebi-a-GCST90016912	TRUE	reported	igd	23.692
	4	23588462	0.0923492	0.0199158	4.75762e-06	14306	ebi-a-GCST90016912	rs1511453	A	G	0.0636	|| id:ebi-a-GCST90016912	TRUE	reported	igd	21.5016
	1	153240013	0.0525581	0.0110408	2.0153e-06	14306	ebi-a-GCST90016912	rs1928341	A	G	0.4215	|| id:ebi-a-GCST90016912	TRUE	reported	igd	22.661
	13	58689340	0.0494596	0.0109424	5.80029e-06	14306	ebi-a-GCST90016912	rs2321387	A	G	0.4702	|| id:ebi-a-GCST90016912	TRUE	reported	igd	20.4304
	3	193456274	0.064006	0.0130374	9.11759e-07	14306	ebi-a-GCST90016912	rs2367850	G	C	0.2207	|| id:ebi-a-GCST90016912	TRUE	reported	igd	24.1024
	7	111285025	0.0513106	0.0109091	2.19816e-06	14306	ebi-a-GCST90016912	rs2613606	T	C	0.6064	|| id:ebi-a-GCST90016912	TRUE	reported	igd	22.1226
class Betaproteobacteria	9	104899117	0.0572286	0.01262	7.33247e-06	14306	ebi-a-GCST90016912	rs320161	A	G	0.2753	|| id:ebi-a-GCST90016912	TRUE	reported	igd	20.564
	4	45642485	0.0832423	0.0167237	5.17166e-07	14306	ebi-a-GCST90016912	rs4033856	C	T	0.1292	|| id:ebi-a-GCST90016912	TRUE	reported	igd	24.7756
	8	112732674	0.0622252	0.0135688	5.86949e-06	14306	ebi-a-GCST90016912	rs56386628	T	C	0.7823	|| id:ebi-a-GCST90016912	TRUE	reported	igd	21.0305
	20	30596130	0.0978177	0.0198522	7.44303e-07	14306	ebi-a-GCST90016912	rs6087811	G	T	0.9185	|| id:ebi-a-GCST90016912	TRUE	reported	igd	24.2783
	5	173497796	0.109741	0.0236	2.9409e-06	14306	ebi-a-GCST90016912	rs62395635	T	C	0.0706	|| id:ebi-a-GCST90016912	TRUE	reported	igd	21.6229
	9	84206018	0.137281	0.0290338	2.05509e-06	14306	ebi-a-GCST90016912	rs72747231	G	C	0.9583	|| id:ebi-a-GCST90016912	TRUE	reported	igd	22.357
	15	56786407	0.121083	0.028075	9.27278e-06	14306	ebi-a-GCST90016912	rs75242906	T	C	0.9463	|| id:ebi-a-GCST90016912	TRUE	reported	igd	18.6006
	18	26569901	0.052911	0.0114866	4.84585e-06	14306	ebi-a-GCST90016912	rs9964679	A	G	0.3101	|| id:ebi-a-GCST90016912	TRUE	reported	igd	21.2182
	chr.exposure	pos.exposure	beta.exposure	se.exposure	pval.exposure	samplesize.exposure	id.exposure	SNP	effect_allele.exposure	other_allele.exposure	eaf.exposure	exposure	mr_keep.exposure	pval_origin.exposure	data_source.exposure	F Value
	2	231676041	0.0794173	0.0182427	9.8935e-06	14306	ebi-a-GCST90016913	rs10209007	G	C	0.0795	|| id:ebi-a-GCST90016913	TRUE	reported	igd	18.9519
	12	5942519	0.052659	0.0113858	3.24399e-06	14306	ebi-a-GCST90016913	rs10774377	A	G	0.334	|| id:ebi-a-GCST90016913	TRUE	reported	igd	21.3904
	21	40703251	0.0641008	0.0127404	3.81408e-07	14306	ebi-a-GCST90016913	rs112334273	G	A	0.2455	|| id:ebi-a-GCST90016913	TRUE	reported	igd	25.314
	4	7420184	0.0529097	0.011818	8.77789e-06	14306	ebi-a-GCST90016913	rs13105690	C	T	0.7326	|| id:ebi-a-GCST90016913	TRUE	reported	igd	20.0439
	5	149077788	0.0511937	0.0109569	3.37085e-06	14306	ebi-a-GCST90016913	rs13179700	T	C	0.3549	|| id:ebi-a-GCST90016913	TRUE	reported	igd	21.8302
	2	116724915	0.0888472	0.0179655	9.54201e-06	14306	ebi-a-GCST90016913	rs13421739	C	G	0.0567	|| id:ebi-a-GCST90016913	TRUE	reported	igd	24.4573
	5	105060362	0.0547202	0.0127338	8.72027e-06	14306	ebi-a-GCST90016913	rs1842454	A	G	0.7932	|| id:ebi-a-GCST90016913	TRUE	reported	igd	18.4663
	14	52494072	0.0724037	0.0153105	4.52137e-06	14306	ebi-a-GCST90016913	rs2273429	G	A	0.8926	|| id:ebi-a-GCST90016913	TRUE	reported	igd	22.3637
class Clostridia id.1859	3	89268714	0.0592279	0.0134556	9.35643e-06	14306	ebi-a-GCST90016913	rs6797343	G	T	0.174	|| id:ebi-a-GCST90016913	TRUE	reported	igd	19.3752
	4	161507301	0.0739995	0.0150815	9.65095e-07	14306	ebi-a-GCST90016913	rs6814436	T	C	0.1322	|| id:ebi-a-GCST90016913	TRUE	reported	igd	24.0751
	4	152131744	0.103803	0.0210883	4.01856e-07	14306	ebi-a-GCST90016913	rs6815608	T	C	0.0845	|| id:ebi-a-GCST90016913	TRUE	reported	igd	24.2291
	6	163743050	0.0524406	0.0116115	6.53085e-06	14306	ebi-a-GCST90016913	rs6934062	G	C	0.2843	|| id:ebi-a-GCST90016913	TRUE	reported	igd	20.3966
	20	50803760	0.0963981	0.0212007	9.04045e-06	14306	ebi-a-GCST90016913	rs7269302	T	A	0.9294	|| id:ebi-a-GCST90016913	TRUE	reported	igd	20.6746
	5	35770550	0.0866169	0.0190393	8.24233e-06	14306	ebi-a-GCST90016913	rs72738886	T	C	0.0775	|| id:ebi-a-GCST90016913	TRUE	reported	igd	20.6968
	18	48792829	0.0581025	0.0120557	1.34295e-06	14306	ebi-a-GCST90016913	rs72915163	C	T	0.7346	|| id:ebi-a-GCST90016913	TRUE	reported	igd	23.2276
	3	131371980	0.0698882	0.0156319	8.39808e-06	14306	ebi-a-GCST90016913	rs76767978	G	A	0.1183	|| id:ebi-a-GCST90016913	TRUE	reported	igd	19.9887
	6	12397187	0.0947036	0.0225117	7.53165e-06	14306	ebi-a-GCST90016913	rs76860606	C	G	0.0716	|| id:ebi-a-GCST90016913	TRUE	reported	igd	17.6977
	21	18567802	0.255639	0.0508787	8.77506e-07	14306	ebi-a-GCST90016913	rs992074	C	T	0.0348	|| id:ebi-a-GCST90016913	TRUE	reported	igd	25.2454
	chr.exposure	pos.exposure	beta.exposure	se.exposure	pval.exposure	samplesize.exposure	id.exposure	SNP	effect_allele.exposure	other_allele.exposure	eaf.exposure	exposure	mr_keep.exposure	pval_origin.exposure	data_source.exposure	F Value
	15	86433579	0.0510212	0.0114339	8.14442e-06	14306	ebi-a-GCST90016914	rs11073596	T	G	0.34	|| id:ebi-a-GCST90016914	TRUE	reported	igd	19.9119
	10	1922731	0.06075	0.0130939	4.82848e-06	14306	ebi-a-GCST90016914	rs11250875	T	C	0.2087	|| id:ebi-a-GCST90016914	TRUE	reported	igd	21.5256
	17	8121332	0.0773006	0.017553	8.0201e-06	14306	ebi-a-GCST90016914	rs11656361	A	C	0.1292	|| id:ebi-a-GCST90016914	TRUE	reported	igd	19.3938
	19	52895166	0.0789796	0.0177205	8.51236e-06	14306	ebi-a-GCST90016914	rs12974142	G	A	0.1083	|| id:ebi-a-GCST90016914	TRUE	reported	igd	19.8645
	7	105084680	0.0565686	0.0126265	7.79938e-06	14306	ebi-a-GCST90016914	rs13307134	C	T	0.2356	|| id:ebi-a-GCST90016914	TRUE	reported	igd	20.0717
	5	90471451	0.0498855	0.0112446	9.77372e-06	14306	ebi-a-GCST90016914	rs1397793	A	G	0.6143	|| id:ebi-a-GCST90016914	TRUE	reported	igd	19.6816
	12	11494021	0.0586265	0.0129006	4.84117e-06	14306	ebi-a-GCST90016914	rs1816223	G	A	0.7893	|| id:ebi-a-GCST90016914	TRUE	reported	igd	20.6523
class Coriobacteriia id.809	1	176571431	0.0603429	0.0126849	1.51604e-06	14306	ebi-a-GCST90016914	rs240104	C	T	0.7555	|| id:ebi-a-GCST90016914	TRUE	reported	igd	22.6297
	3	11654412	0.116408	0.0258545	9.02693e-06	14306	ebi-a-GCST90016914	rs2442778	A	G	0.9543	|| id:ebi-a-GCST90016914	TRUE	reported	igd	20.2718
	9	136512906	0.0926543	0.0209468	8.26913e-06	14306	ebi-a-GCST90016914	rs3025411	A	G	0.1044	|| id:ebi-a-GCST90016914	TRUE	reported	igd	19.5657
	17	37376685	0.0965017	0.0207666	3.88356e-06	14306	ebi-a-GCST90016914	rs34739816	G	T	0.0815	|| id:ebi-a-GCST90016914	TRUE	reported	igd	21.5943
	19	55857777	0.0504262	0.0113307	9.71449e-06	14306	ebi-a-GCST90016914	rs45480394	G	T	0.6382	|| id:ebi-a-GCST90016914	TRUE	reported	igd	19.8061
	10	1223742	0.056503	0.0125055	5.89508e-06	14306	ebi-a-GCST90016914	rs4880783	G	T	0.2117	|| id:ebi-a-GCST90016914	TRUE	reported	igd	20.4146
	7	24464799	0.0486059	0.0108982	7.87281e-06	14306	ebi-a-GCST90016914	rs62448869	A	T	0.5398	|| id:ebi-a-GCST90016914	TRUE	reported	igd	19.8915
	20	62072077	0.0714367	0.0154113	5.39126e-06	14306	ebi-a-GCST90016914	rs67561917	G	A	0.8579	|| id:ebi-a-GCST90016914	TRUE	reported	igd	21.4864
	10	65799217	0.0778402	0.0155815	5.43313e-07	14306	ebi-a-GCST90016914	rs719099	A	G	0.1362	|| id:ebi-a-GCST90016914	TRUE	reported	igd	24.9568
	1	179629191	0.0483227	0.0109062	9.62144e-06	14306	ebi-a-GCST90016914	rs7540303	C	T	0.4215	|| id:ebi-a-GCST90016914	TRUE	reported	igd	19.6316
	5	125460084	0.0774888	0.0171877	5.63093e-06	14306	ebi-a-GCST90016914	rs76779974	C	G	0.1123	|| id:ebi-a-GCST90016914	TRUE	reported	igd	20.3256
	10	5644995	0.0731501	0.0164186	5.24675e-06	14306	ebi-a-GCST90016914	rs7898585	T	C	0.1262	|| id:ebi-a-GCST90016914	TRUE	reported	igd	19.8499
	5	459415	0.25584	0.0561995	4.65693e-06	14306	ebi-a-GCST90016914	rs80046645	C	G	0.0408	|| id:ebi-a-GCST90016914	TRUE	reported	igd	20.7239
	14	39660509	0.103377	0.0229286	6.8962e-06	14306	ebi-a-GCST90016914	rs8010111	A	G	0.9354	|| id:ebi-a-GCST90016914	TRUE	reported	igd	20.3279
	chr.exposure	pos.exposure	beta.exposure	se.exposure	pval.exposure	samplesize.exposure	id.exposure	SNP	effect_allele.exposure	other_allele.exposure	eaf.exposure	exposure	mr_keep.exposure	pval_origin.exposure	data_source.exposure	F Value
	11	10658735	0.055176	0.0121602	9.65162e-06	14306	ebi-a-GCST90016915	rs1035691	G	A	0.662	|| id:ebi-a-GCST90016915	TRUE	reported	igd	20.5882
	9	15269705	0.206594	0.0456908	4.63052e-06	14306	ebi-a-GCST90016915	rs112381107	C	T	0.0477	|| id:ebi-a-GCST90016915	TRUE	reported	igd	20.4446
	10	11855599	0.0544219	0.0117397	3.94121e-06	14306	ebi-a-GCST90016915	rs11599763	C	T	0.6103	|| id:ebi-a-GCST90016915	TRUE	reported	igd	21.4899
	1	203308383	0.0705516	0.0150849	5.67884e-06	14306	ebi-a-GCST90016915	rs16851319	C	G	0.8131	|| id:ebi-a-GCST90016915	TRUE	reported	igd	21.874
	18	69312914	0.0710762	0.015953	5.6863e-06	14306	ebi-a-GCST90016915	rs17084793	A	G	0.839	|| id:ebi-a-GCST90016915	TRUE	reported	igd	19.8501
	9	81834426	0.0735881	0.0154246	1.60221e-06	14306	ebi-a-GCST90016915	rs17791387	G	A	0.8588	|| id:ebi-a-GCST90016915	TRUE	reported	igd	22.7608
class Deltaproteobacteria id.3087	1	203991605	0.110335	0.0253336	3.14188e-06	14306	ebi-a-GCST90016915	rs2692012	A	G	0.0636	|| id:ebi-a-GCST90016915	TRUE	reported	igd	18.9685
	21	45064961	0.0561722	0.0124124	5.44553e-06	14306	ebi-a-GCST90016915	rs2838334	G	A	0.3231	|| id:ebi-a-GCST90016915	TRUE	reported	igd	20.4801
	2	233929283	0.0523484	0.011566	7.50119e-06	14306	ebi-a-GCST90016915	rs3935584	T	C	0.504	|| id:ebi-a-GCST90016915	TRUE	reported	igd	20.4852
	17	2856662	0.0936514	0.02012	3.58889e-06	14306	ebi-a-GCST90016915	rs4506934	T	C	0.8877	|| id:ebi-a-GCST90016915	TRUE	reported	igd	21.6657
	8	57867671	0.0779693	0.0170738	7.31375e-06	14306	ebi-a-GCST90016915	rs55744759	G	A	0.8837	|| id:ebi-a-GCST90016915	TRUE	reported	igd	20.8539
	20	33694801	0.0825716	0.0165958	3.39555e-07	14306	ebi-a-GCST90016915	rs6058181	C	T	0.1233	|| id:ebi-a-GCST90016915	TRUE	reported	igd	24.7551
	15	96161065	0.0585411	0.0129358	4.85087e-06	14306	ebi-a-GCST90016915	rs62020470	G	A	0.7406	|| id:ebi-a-GCST90016915	TRUE	reported	igd	20.4802
	16	71541641	0.0538457	0.0117718	5.02077e-06	14306	ebi-a-GCST90016915	rs9928243	A	C	0.5746	|| id:ebi-a-GCST90016915	TRUE	reported	igd	20.9226
	chr.exposure	pos.exposure	beta.exposure	se.exposure	pval.exposure	samplesize.exposure	id.exposure	SNP	effect_allele.exposure	other_allele.exposure	eaf.exposure	exposure	mr_keep.exposure	pval_origin.exposure	data_source.exposure	F Value
	5	3002546	0.0492438	0.010887	6.14582e-06	14306	ebi-a-GCST90016916	rs1074800	A	G	0.3986	|| id:ebi-a-GCST90016916	TRUE	reported	igd	20.4591
	10	133897233	0.0552212	0.0116074	2.33115e-06	14306	ebi-a-GCST90016916	rs10781552	T	C	0.6879	|| id:ebi-a-GCST90016916	TRUE	reported	igd	22.633
	13	40385457	0.10305	0.0224648	2.79126e-06	14306	ebi-a-GCST90016916	rs17530232	A	G	0.0765	|| id:ebi-a-GCST90016916	TRUE	reported	igd	21.0422
	1	64139196	0.0475363	0.0106939	9.52708e-06	14306	ebi-a-GCST90016916	rs1884466	T	C	0.5487	|| id:ebi-a-GCST90016916	TRUE	reported	igd	19.7596
	3	195793712	0.0524152	0.0106784	8.95468e-07	14306	ebi-a-GCST90016916	rs2300774	G	A	0.4076	|| id:ebi-a-GCST90016916	TRUE	reported	igd	24.0936
Erysipelotrichia id.2147	1	97457427	0.0497374	0.0111376	8.02897e-06	14306	ebi-a-GCST90016916	rs290833	G	T	0.6312	|| id:ebi-a-GCST90016916	TRUE	reported	igd	19.9427
	17	70327224	0.0806041	0.0167641	1.8451e-06	14306	ebi-a-GCST90016916	rs35161940	C	T	0.8728	|| id:ebi-a-GCST90016916	TRUE	reported	igd	23.1182
	14	48997206	0.0608929	0.0133764	4.23107e-06	14306	ebi-a-GCST90016916	rs4078432	T	C	0.8191	|| id:ebi-a-GCST90016916	TRUE	reported	igd	20.7231
	14	80357610	0.0724145	0.0164471	5.40344e-06	14306	ebi-a-GCST90016916	rs56970041	T	G	0.1113	|| id:ebi-a-GCST90016916	TRUE	reported	igd	19.3853
	8	38803551	0.0681159	0.0127883	1.12264e-07	14306	ebi-a-GCST90016916	rs62504403	C	T	0.2356	|| id:ebi-a-GCST90016916	TRUE	reported	igd	28.3708
	18	5830507	0.0945759	0.0194091	9.12347e-07	14306	ebi-a-GCST90016916	rs7234058	C	T	0.9026	|| id:ebi-a-GCST90016916	TRUE	reported	igd	23.7438
	8	2954952	0.0839071	0.0199131	9.28453e-06	14306	ebi-a-GCST90016916	rs7826267	G	T	0.9254	|| id:ebi-a-GCST90016916	TRUE	reported	igd	17.755
	14	56156504	0.0538798	0.0116888	4.08479e-06	14306	ebi-a-GCST90016916	rs8003149	C	T	0.2823	|| id:ebi-a-GCST90016916	TRUE	reported	igd	21.2477
	chr.exposure	pos.exposure	beta.exposure	se.exposure	pval.exposure	samplesize.exposure	id.exposure	SNP	effect_allele.exposure	other_allele.exposure	eaf.exposure	exposure	mr_keep.exposure	pval_origin.exposure	data_source.exposure	F Value
	12	43572952	0.0579153	0.0118796	9.94764e-07	14306	ebi-a-GCST90016917	rs11181912	A	G	0.6551	|| id:ebi-a-GCST90016917	TRUE	reported	igd	23.7675
	1	186502694	0.0788843	0.0172415	8.89488e-06	14306	ebi-a-GCST90016917	rs12404135	G	A	0.8827	|| id:ebi-a-GCST90016917	TRUE	reported	igd	20.933
	8	115123937	0.0541424	0.0116333	3.2898e-06	14306	ebi-a-GCST90016917	rs6469506	T	A	0.3907	|| id:ebi-a-GCST90016917	TRUE	reported	igd	21.6605
class Gammaproteobacteria id.3303	2	167986992	0.074251	0.0146392	1.99494e-07	14306	ebi-a-GCST90016917	rs6706173	A	C	0.1501	|| id:ebi-a-GCST90016917	TRUE	reported	igd	25.7259
	3	18615903	0.0729012	0.0163003	8.7878e-06	14306	ebi-a-GCST90016917	rs75101789	C	T	0.1561	|| id:ebi-a-GCST90016917	TRUE	reported	igd	20.0022
	18	48185248	0.15921	0.0351373	7.9241e-06	14306	ebi-a-GCST90016917	rs79795896	G	A	0.9463	|| id:ebi-a-GCST90016917	TRUE	reported	igd	20.5307
	6	137612554	0.0549673	0.0120924	4.54611e-06	14306	ebi-a-GCST90016917	rs9494710	T	C	0.6243	|| id:ebi-a-GCST90016917	TRUE	reported	igd	20.6625
	18	75633634	0.0740614	0.0162596	6.77002e-06	14306	ebi-a-GCST90016917	rs9973122	T	A	0.1421	|| id:ebi-a-GCST90016917	TRUE	reported	igd	20.7474
	chr.exposure	pos.exposure	beta.exposure	se.exposure	pval.exposure	samplesize.exposure	id.exposure	SNP	effect_allele.exposure	other_allele.exposure	eaf.exposure	exposure	mr_keep.exposure	pval_origin.exposure	data_source.exposure	F Value
	15	101242690	0.105025	0.0233484	8.14836e-06	14306	ebi-a-GCST90016918	rs1002941	G	A	0.2793	|| id:ebi-a-GCST90016918	TRUE	reported	igd	20.2335
	7	146795379	0.109431	0.0234879	1.9073e-06	14306	ebi-a-GCST90016918	rs11770843	C	T	0.2594	|| id:ebi-a-GCST90016918	TRUE	reported	igd	21.7066
	15	25162535	0.152377	0.0324332	4.05864e-06	14306	ebi-a-GCST90016918	rs17114848	G	A	0.1093	|| id:ebi-a-GCST90016918	TRUE	reported	igd	22.0729
class Lentisphaeria id.2250	13	20687179	0.122368	0.0270329	4.38258e-06	14306	ebi-a-GCST90016918	rs2031282	A	G	0.17	|| id:ebi-a-GCST90016918	TRUE	reported	igd	20.4904
	5	94720245	0.109438	0.023693	4.24356e-06	14306	ebi-a-GCST90016918	rs2731834	C	G	0.2237	|| id:ebi-a-GCST90016918	TRUE	reported	igd	21.3352
	21	21023966	0.13741	0.0289246	1.72211e-06	14306	ebi-a-GCST90016918	rs2825714	G	A	0.8429	|| id:ebi-a-GCST90016918	TRUE	reported	igd	22.5685
	9	111086170	0.21635	0.0439866	1.07924e-06	14306	ebi-a-GCST90016918	rs62570196	T	C	0.9314	|| id:ebi-a-GCST90016918	TRUE	reported	igd	24.1921
	1	11943792	0.220207	0.0486196	5.18036e-06	14306	ebi-a-GCST90016918	rs72640280	A	G	0.0537	|| id:ebi-a-GCST90016918	TRUE	reported	igd	20.5135
	3	6223568	0.131217	0.0288713	8.66343e-06	14306	ebi-a-GCST90016918	rs73113483	A	T	0.8767	|| id:ebi-a-GCST90016918	TRUE	reported	igd	20.6561
	20	61394262	0.230292	0.0480168	1.86132e-06	14306	ebi-a-GCST90016918	rs77599476	A	G	0.0656	|| id:ebi-a-GCST90016918	TRUE	reported	igd	23.0023
	chr.exposure	pos.exposure	beta.exposure	se.exposure	pval.exposure	samplesize.exposure	id.exposure	SNP	effect_allele.exposure	other_allele.exposure	eaf.exposure	exposure	mr_keep.exposure	pval_origin.exposure	data_source.exposure	F Value
	14	107061448	0.0861928	0.0193381	8.67142e-06	14306	ebi-a-GCST90016919	rs10148250	G	A	0.4563	|| id:ebi-a-GCST90016919	TRUE	reported	igd	19.8662
	9	26184578	0.0814624	0.0184409	9.95795e-06	14306	ebi-a-GCST90016919	rs10738747	G	A	0.496	|| id:ebi-a-GCST90016919	TRUE	reported	igd	19.5142
	16	80493705	0.0989487	0.0196972	6.02893e-07	14306	ebi-a-GCST90016919	rs11150282	T	C	0.3211	|| id:ebi-a-GCST90016919	TRUE	reported	igd	25.2355
	9	24648997	0.205352	0.0454982	8.05675e-06	14306	ebi-a-GCST90016919	rs113884518	C	T	0.9513	|| id:ebi-a-GCST90016919	TRUE	reported	igd	20.3709
	9	122046549	0.123968	0.0278958	7.10739e-06	14306	ebi-a-GCST90016919	rs1221147	T	A	0.1561	|| id:ebi-a-GCST90016919	TRUE	reported	igd	19.7488
class Melainabacteria id.1589	1	230523039	0.0896103	0.0186432	1.27488e-06	14306	ebi-a-GCST90016919	rs16851659	C	G	0.6113	|| id:ebi-a-GCST90016919	TRUE	reported	igd	23.1033
	17	53906328	0.214848	0.0470878	6.69083e-06	14306	ebi-a-GCST90016919	rs28678345	T	C	0.0467	|| id:ebi-a-GCST90016919	TRUE	reported	igd	20.8183
	11	2937631	0.083758	0.0185796	8.19917e-06	14306	ebi-a-GCST90016919	rs367480	A	G	0.5726	|| id:ebi-a-GCST90016919	TRUE	reported	igd	20.3226
	9	115975389	0.0896187	0.0185106	1.48057e-06	14306	ebi-a-GCST90016919	rs4129395	G	A	0.4264	|| id:ebi-a-GCST90016919	TRUE	reported	igd	23.4399
	7	20010624	0.166216	0.0355728	2.86609e-06	14306	ebi-a-GCST90016919	rs73074665	A	T	0.0855	|| id:ebi-a-GCST90016919	TRUE	reported	igd	21.8328
	18	1008278	0.103539	0.0234287	6.84636e-06	14306	ebi-a-GCST90016919	rs789069	C	A	0.828	|| id:ebi-a-GCST90016919	TRUE	reported	igd	19.5304
	15	100747683	0.226722	0.0487841	3.29011e-06	14306	ebi-a-GCST90016919	rs79790072	T	C	0.0567	|| id:ebi-a-GCST90016919	TRUE	reported	igd	21.5989
	3	14306949	0.159735	0.0292553	5.36056e-08	14306	ebi-a-GCST90016919	rs9864379	C	T	0.8867	|| id:ebi-a-GCST90016919	TRUE	reported	igd	29.812
	chr.exposure	pos.exposure	beta.exposure	se.exposure	pval.exposure	samplesize.exposure	id.exposure	SNP	effect_allele.exposure	other_allele.exposure	eaf.exposure	exposure	mr_keep.exposure	pval_origin.exposure	data_source.exposure	F Value
	2	125440268	0.121754	0.0235357	3.01432e-07	14306	ebi-a-GCST90016920	rs10202904	G	T	0.5328	|| id:ebi-a-GCST90016920	TRUE	reported	igd	26.7616
	19	46439321	0.111274	0.0247517	9.27897e-06	14306	ebi-a-GCST90016920	rs10424197	A	G	0.675	|| id:ebi-a-GCST90016920	TRUE	reported	igd	20.2105
	11	89349287	0.111465	0.0250516	6.51869e-06	14306	ebi-a-GCST90016920	rs11018665	A	T	0.341	|| id:ebi-a-GCST90016920	TRUE	reported	igd	19.7973
	12	43701132	0.216781	0.0493496	6.07561e-06	14306	ebi-a-GCST90016920	rs12825290	G	C	0.9394	|| id:ebi-a-GCST90016920	TRUE	reported	igd	19.2963
	3	2086167	0.164498	0.0364959	7.44338e-06	14306	ebi-a-GCST90016920	rs4257531	G	A	0.1143	|| id:ebi-a-GCST90016920	TRUE	reported	igd	20.3158
class Methanobacteria id.119	5	178160975	0.178661	0.039298	6.17988e-06	14306	ebi-a-GCST90016920	rs56131665	G	A	0.0934	|| id:ebi-a-GCST90016920	TRUE	reported	igd	20.669
	19	28827760	0.153519	0.0344519	8.22527e-06	14306	ebi-a-GCST90016920	rs6508769	T	C	0.165	|| id:ebi-a-GCST90016920	TRUE	reported	igd	19.8563
	3	15053083	0.199566	0.0411825	1.63061e-06	14306	ebi-a-GCST90016920	rs6776814	C	T	0.9105	|| id:ebi-a-GCST90016920	TRUE	reported	igd	23.4827
	7	10773932	0.15814	0.0351803	8.44578e-06	14306	ebi-a-GCST90016920	rs73068003	T	G	0.8777	|| id:ebi-a-GCST90016920	TRUE	reported	igd	20.2062
	13	41956181	0.21534	0.0436695	1.40854e-06	14306	ebi-a-GCST90016920	rs73457410	A	G	0.0666	|| id:ebi-a-GCST90016920	TRUE	reported	igd	24.316
	12	21338861	0.227245	0.048763	5.92107e-06	14306	ebi-a-GCST90016920	rs75208022	T	C	0.9235	|| id:ebi-a-GCST90016920	TRUE	reported	igd	21.7174
	4	104418307	0.216999	0.0449076	1.87556e-06	14306	ebi-a-GCST90016920	rs894996	C	A	0.0716	|| id:ebi-a-GCST90016920	TRUE	reported	igd	23.3494
	chr.exposure	pos.exposure	beta.exposure	se.exposure	pval.exposure	samplesize.exposure	id.exposure	SNP	effect_allele.exposure	other_allele.exposure	eaf.exposure	exposure	mr_keep.exposure	pval_origin.exposure	data_source.exposure	F Value
	8	59440824	0.0769142	0.0153953	1.09001e-06	14306	ebi-a-GCST90016921	rs10108398	G	A	0.2913	|| id:ebi-a-GCST90016921	TRUE	reported	igd	24.9595
	2	157532549	0.074438	0.0153389	9.56577e-07	14306	ebi-a-GCST90016921	rs11890098	A	G	0.2555	|| id:ebi-a-GCST90016921	TRUE	reported	igd	23.5505
	1	61850864	0.101147	0.0230978	3.65098e-06	14306	ebi-a-GCST90016921	rs12566890	G	T	0.9046	|| id:ebi-a-GCST90016921	TRUE	reported	igd	19.1763
	14	97159674	0.06099	0.0135623	6.60861e-06	14306	ebi-a-GCST90016921	rs17214486	C	A	0.4016	|| id:ebi-a-GCST90016921	TRUE	reported	igd	20.2232
	7	79490250	0.0944239	0.0211806	8.39499e-06	14306	ebi-a-GCST90016921	rs2464826	A	C	0.1262	|| id:ebi-a-GCST90016921	TRUE	reported	igd	19.8741
	15	95309676	0.0820873	0.0188312	8.07402e-06	14306	ebi-a-GCST90016921	rs28537087	G	A	0.164	|| id:ebi-a-GCST90016921	TRUE	reported	igd	19.0019
class Mollicutes id.3920	1	109965986	0.0681052	0.0149061	4.2335e-06	14306	ebi-a-GCST90016921	rs3768491	G	A	0.7137	|| id:ebi-a-GCST90016921	TRUE	reported	igd	20.8753
	13	73170489	0.0819606	0.0181628	7.26993e-06	14306	ebi-a-GCST90016921	rs4885016	C	T	0.8429	|| id:ebi-a-GCST90016921	TRUE	reported	igd	20.3631
	20	16259524	0.114937	0.0248606	4.55481e-06	14306	ebi-a-GCST90016921	rs6043847	C	T	0.9304	|| id:ebi-a-GCST90016921	TRUE	reported	igd	21.3745
	11	47103877	0.0841852	0.0178119	3.25792e-06	14306	ebi-a-GCST90016921	rs72901605	C	T	0.8141	|| id:ebi-a-GCST90016921	TRUE	reported	igd	22.3383
	14	46519718	0.221639	0.0462918	1.5569e-06	14306	ebi-a-GCST90016921	rs74603314	T	C	0.0457	|| id:ebi-a-GCST90016921	TRUE	reported	igd	22.9237
	11	108439087	0.108283	0.0237289	5.87611e-06	14306	ebi-a-GCST90016921	rs78169027	G	A	0.8917	|| id:ebi-a-GCST90016921	TRUE	reported	igd	20.8241
	chr.exposure	pos.exposure	beta.exposure	se.exposure	pval.exposure	samplesize.exposure	id.exposure	SNP	effect_allele.exposure	other_allele.exposure	eaf.exposure	exposure	mr_keep.exposure	pval_origin.exposure	data_source.exposure	F Value
	7	75609677	0.0529785	0.0119177	9.26296e-06	14306	ebi-a-GCST90016922	rs1135612	G	A	0.2445	|| id:ebi-a-GCST90016922	TRUE	reported	igd	19.7613
	3	142135117	0.0625312	0.0131735	1.95488e-06	14306	ebi-a-GCST90016922	rs13086907	G	A	0.1998	|| id:ebi-a-GCST90016922	TRUE	reported	igd	22.5316
	8	41231597	0.0502053	0.0108382	2.93326e-06	14306	ebi-a-GCST90016922	rs1447205	C	G	0.6382	|| id:ebi-a-GCST90016922	TRUE	reported	igd	21.4578
	5	165266628	0.0565284	0.0112298	4.14601e-07	14306	ebi-a-GCST90016922	rs1643968	C	T	0.7197	|| id:ebi-a-GCST90016922	TRUE	reported	igd	25.339
	10	80086072	0.0748989	0.0166458	7.58124e-06	14306	ebi-a-GCST90016922	rs1649999	A	G	0.0974	|| id:ebi-a-GCST90016922	TRUE	reported	igd	20.2461
class Negativicutes id.2164	21	34377485	0.0489057	0.0108842	8.43918e-06	14306	ebi-a-GCST90016922	rs2834062	A	G	0.3648	|| id:ebi-a-GCST90016922	TRUE	reported	igd	20.1895
	10	115597993	0.0543966	0.0129365	7.80657e-06	14306	ebi-a-GCST90016922	rs4463806	C	T	0.7962	|| id:ebi-a-GCST90016922	TRUE	reported	igd	17.6811
	7	22817571	0.0501306	0.0105798	2.00111e-06	14306	ebi-a-GCST90016922	rs4722181	T	G	0.4761	|| id:ebi-a-GCST90016922	TRUE	reported	igd	22.4518
	16	21249925	0.0659623	0.0134137	1.1623e-06	14306	ebi-a-GCST90016922	rs60274479	C	T	0.7773	|| id:ebi-a-GCST90016922	TRUE	reported	igd	24.1821
	9	124912908	0.0777075	0.0168628	2.95474e-06	14306	ebi-a-GCST90016922	rs61249479	A	C	0.0875	|| id:ebi-a-GCST90016922	TRUE	reported	igd	21.2357
	15	101245088	0.114178	0.02405	2.16631e-06	14306	ebi-a-GCST90016922	rs71405394	A	G	0.9483	|| id:ebi-a-GCST90016922	TRUE	reported	igd	22.539
	4	17413426	0.151829	0.0314932	1.87452e-06	14306	ebi-a-GCST90016922	rs73232831	A	G	0.9364	|| id:ebi-a-GCST90016922	TRUE	reported	igd	23.2421
	10	5579818	0.047817	0.0105282	6.06108e-06	14306	ebi-a-GCST90016922	rs9423647	G	A	0.5149	|| id:ebi-a-GCST90016922	TRUE	reported	igd	20.628
	chr.exposure	pos.exposure	beta.exposure	se.exposure	pval.exposure	samplesize.exposure	id.exposure	SNP	effect_allele.exposure	other_allele.exposure	eaf.exposure	exposure	mr_keep.exposure	pval_origin.exposure	data_source.exposure	F Value
	1	105422565	0.0655342	0.0142231	4.13409e-06	14306	ebi-a-GCST90016923	rs11184341	G	C	0.2783	|| id:ebi-a-GCST90016923	TRUE	reported	igd	21.2299
	12	130309670	0.090699	0.0196746	3.73844e-06	14306	ebi-a-GCST90016923	rs111862613	T	C	0.166	|| id:ebi-a-GCST90016923	TRUE	reported	igd	21.2517
	18	49473635	0.204683	0.0431572	2.91823e-06	14306	ebi-a-GCST90016923	rs117107102	A	G	0.0447	|| id:ebi-a-GCST90016923	TRUE	reported	igd	22.4935
	4	95027272	0.0749798	0.0150177	6.73085e-07	14306	ebi-a-GCST90016923	rs11729256	T	C	0.2386	|| id:ebi-a-GCST90016923	TRUE	reported	igd	24.9277
	15	97570657	0.0618926	0.0130946	2.17165e-06	14306	ebi-a-GCST90016923	rs12908520	G	A	0.4563	|| id:ebi-a-GCST90016923	TRUE	reported	igd	22.3405
	16	81063149	0.0746844	0.0156194	2.58297e-06	14306	ebi-a-GCST90016923	rs2602429	C	T	0.2217	|| id:ebi-a-GCST90016923	TRUE	reported	igd	22.8629
class Verrucomicrobiae id.4029	10	11389614	0.0641275	0.0140995	5.18561e-06	14306	ebi-a-GCST90016923	rs3995795	C	T	0.3181	|| id:ebi-a-GCST90016923	TRUE	reported	igd	20.6862
	10	5064327	0.0689292	0.0147693	2.63615e-06	14306	ebi-a-GCST90016923	rs4242783	G	A	0.2873	|| id:ebi-a-GCST90016923	TRUE	reported	igd	21.7814
	11	130280667	0.0648843	0.0135928	1.1222e-06	14306	ebi-a-GCST90016923	rs4936098	A	G	0.34	|| id:ebi-a-GCST90016923	TRUE	reported	igd	22.7856
	1	41074472	0.0758309	0.0167762	6.7228e-06	14306	ebi-a-GCST90016923	rs61779207	A	G	0.8221	|| id:ebi-a-GCST90016923	TRUE	reported	igd	20.4317
	4	100544188	0.112164	0.0236422	1.63222e-06	14306	ebi-a-GCST90016923	rs74542928	T	C	0.0785	|| id:ebi-a-GCST90016923	TRUE	reported	igd	22.5077
	6	56341481	0.0704036	0.0147128	2.53688e-06	14306	ebi-a-GCST90016923	rs9349825	G	A	0.7207	|| id:ebi-a-GCST90016923	TRUE	reported	igd	22.8981
	20	31867840	0.0631436	0.0143767	9.60993e-06	14306	ebi-a-GCST90016923	rs941682	A	G	0.6889	|| id:ebi-a-GCST90016923	TRUE	reported	igd	19.2904
	chr.exposure	pos.exposure	beta.exposure	se.exposure	pval.exposure	samplesize.exposure	id.exposure	SNP	effect_allele.exposure	other_allele.exposure	eaf.exposure	exposure	mr_keep.exposure	pval_origin.exposure	data_source.exposure	F Value
	6	158647999	0.065675	0.0142257	3.24908e-06	14306	ebi-a-GCST90016924	rs262812	C	T	0.7336	|| id:ebi-a-GCST90016924	TRUE	reported	igd	21.3134
	9	107117653	0.0662557	0.0140257	2.23676e-06	14306	ebi-a-GCST90016924	rs2933324	G	A	0.7465	|| id:ebi-a-GCST90016924	TRUE	reported	igd	22.315
	20	61991833	0.117863	0.0257351	5.86422e-06	14306	ebi-a-GCST90016924	rs45497800	C	T	0.9175	|| id:ebi-a-GCST90016924	TRUE	reported	igd	20.9751
family Acidaminococcaceae id.2166	1	203102563	0.0595857	0.01296	4.24326e-06	14306	ebi-a-GCST90016924	rs6427992	C	G	0.6074	|| id:ebi-a-GCST90016924	TRUE	reported	igd	21.1385
	11	114701288	0.165911	0.0349516	2.3151e-06	14306	ebi-a-GCST90016924	rs6589457	A	G	0.0547	|| id:ebi-a-GCST90016924	TRUE	reported	igd	22.5329
	6	5723181	0.0796106	0.0169192	2.21304e-06	14306	ebi-a-GCST90016924	rs6923842	C	T	0.831	|| id:ebi-a-GCST90016924	TRUE	reported	igd	22.1402
	3	186553389	0.108969	0.0243533	7.0881e-06	14306	ebi-a-GCST90016924	rs74540770	A	G	0.9354	|| id:ebi-a-GCST90016924	TRUE	reported	igd	20.0212
	3	18462531	0.143755	0.0323244	9.16474e-06	14306	ebi-a-GCST90016924	rs78702810	C	T	0.9533	|| id:ebi-a-GCST90016924	TRUE	reported	igd	19.7781
	chr.exposure	pos.exposure	beta.exposure	se.exposure	pval.exposure	samplesize.exposure	id.exposure	SNP	effect_allele.exposure	other_allele.exposure	eaf.exposure	exposure	mr_keep.exposure	pval_origin.exposure	data_source.exposure	F Value
	9	76394568	0.0887537	0.0195009	3.64418e-06	14306	ebi-a-GCST90016925	rs2889192	G	T	0.2068	|| id:ebi-a-GCST90016925	TRUE	reported	igd	20.714
family Actinomycetaceae id.421	6	67207371	0.123756	0.026427	5.47974e-06	14306	ebi-a-GCST90016925	rs34583783	G	T	0.1024	|| id:ebi-a-GCST90016925	TRUE	reported	igd	21.9299
	6	133007480	0.241826	0.0503796	1.82671e-06	14306	ebi-a-GCST90016925	rs35011108	A	G	0.0636	|| id:ebi-a-GCST90016925	TRUE	reported	igd	23.0407
	6	169224781	0.0747546	0.0164684	6.05327e-06	14306	ebi-a-GCST90016925	rs4073240	G	A	0.3827	|| id:ebi-a-GCST90016925	TRUE	reported	igd	20.605
	15	29850991	0.0761407	0.0169007	6.12421e-06	14306	ebi-a-GCST90016925	rs58484246	T	C	0.326	|| id:ebi-a-GCST90016925	TRUE	reported	igd	20.2966
	chr.exposure	pos.exposure	beta.exposure	se.exposure	pval.exposure	samplesize.exposure	id.exposure	SNP	effect_allele.exposure	other_allele.exposure	eaf.exposure	exposure	mr_keep.exposure	pval_origin.exposure	data_source.exposure	F Value
	9	82485327	0.0775052	0.0171554	5.27667e-06	14306	ebi-a-GCST90016926	rs112135816	G	T	0.8529	|| id:ebi-a-GCST90016926	TRUE	reported	igd	20.4108
	6	138305038	0.131484	0.0281089	3.56484e-06	14306	ebi-a-GCST90016926	rs112159068	A	T	0.0726	|| id:ebi-a-GCST90016926	TRUE	reported	igd	21.8805
	5	104233461	0.058727	0.0128306	5.96788e-06	14306	ebi-a-GCST90016926	rs1153990	G	A	0.7793	|| id:ebi-a-GCST90016926	TRUE	reported	igd	20.9499
	16	85945839	0.0489475	0.0110321	9.12704e-06	14306	ebi-a-GCST90016926	rs147968	C	T	0.4414	|| id:ebi-a-GCST90016926	TRUE	reported	igd	19.6854
	4	75867283	0.0609257	0.0125363	1.1272e-06	14306	ebi-a-GCST90016926	rs17000015	T	A	0.7386	|| id:ebi-a-GCST90016926	TRUE	reported	igd	23.619
family Alcaligenaceae id.2875	7	111294074	0.0490922	0.0110231	7.7992e-06	14306	ebi-a-GCST90016926	rs2040996	C	T	0.6004	|| id:ebi-a-GCST90016926	TRUE	reported	igd	19.8343
	14	66593668	0.0563972	0.0124753	6.08373e-06	14306	ebi-a-GCST90016926	rs2184675	T	A	0.7594	|| id:ebi-a-GCST90016926	TRUE	reported	igd	20.4368
	3	193456274	0.0629104	0.0131712	1.84629e-06	14306	ebi-a-GCST90016926	rs2367850	G	C	0.2207	|| id:ebi-a-GCST90016926	TRUE	reported	igd	22.8136
	15	71522509	0.0516967	0.0115503	6.60602e-06	14306	ebi-a-GCST90016926	rs28480294	C	T	0.6561	|| id:ebi-a-GCST90016926	TRUE	reported	igd	20.0327
	4	45642485	0.081834	0.0168931	1.02903e-06	14306	ebi-a-GCST90016926	rs4033856	C	T	0.1292	|| id:ebi-a-GCST90016926	TRUE	reported	igd	23.4665
	2	239900775	0.0684302	0.0133636	2.75943e-07	14306	ebi-a-GCST90016926	rs62191117	A	G	0.2058	|| id:ebi-a-GCST90016926	TRUE	reported	igd	26.221
	5	173497796	0.110583	0.0238514	3.34696e-06	14306	ebi-a-GCST90016926	rs62395635	T	C	0.0706	|| id:ebi-a-GCST90016926	TRUE	reported	igd	21.4956
	20	29836081	0.0738409	0.0151678	1.03743e-06	14306	ebi-a-GCST90016926	rs67737557	C	G	0.165	|| id:ebi-a-GCST90016926	TRUE	reported	igd	23.7
	7	104214487	0.0593564	0.0129137	3.8858e-06	14306	ebi-a-GCST90016926	rs6969323	C	A	0.7485	|| id:ebi-a-GCST90016926	TRUE	reported	igd	21.1268
	12	1396151	0.106817	0.023298	3.33557e-06	14306	ebi-a-GCST90016926	rs7302582	C	G	0.9493	|| id:ebi-a-GCST90016926	TRUE	reported	igd	21.0205
	11	20763367	0.0944052	0.0213287	6.85046e-06	14306	ebi-a-GCST90016926	rs74776516	G	T	0.9245	|| id:ebi-a-GCST90016926	TRUE	reported	igd	19.5913
	3	70588939	0.0603335	0.0127779	2.70477e-06	14306	ebi-a-GCST90016926	rs7638039	T	C	0.2326	|| id:ebi-a-GCST90016926	TRUE	reported	igd	22.2945
	4	83635863	0.0882459	0.0198328	6.98602e-06	14306	ebi-a-GCST90016926	rs79846372	A	G	0.0765	|| id:ebi-a-GCST90016926	TRUE	reported	igd	19.798
	13	58545246	0.0570888	0.0110683	2.35109e-07	14306	ebi-a-GCST90016926	rs9537886	C	A	0.4771	|| id:ebi-a-GCST90016926	TRUE	reported	igd	26.6036
	18	26569901	0.0537051	0.0116008	4.47384e-06	14306	ebi-a-GCST90016926	rs9964679	A	G	0.3101	|| id:ebi-a-GCST90016926	TRUE	reported	igd	21.4316
	chr.exposure	pos.exposure	beta.exposure	se.exposure	pval.exposure	samplesize.exposure	id.exposure	SNP	effect_allele.exposure	other_allele.exposure	eaf.exposure	exposure	mr_keep.exposure	pval_origin.exposure	data_source.exposure	F Value
	1	10644351	0.0740746	0.0147633	1.79511e-06	14306	ebi-a-GCST90016927	rs11585893	G	A	0.8519	|| id:ebi-a-GCST90016927	TRUE	reported	igd	25.1751
	6	41519430	0.059205	0.0131195	7.48497e-06	14306	ebi-a-GCST90016927	rs13207588	G	A	0.7674	|| id:ebi-a-GCST90016927	TRUE	reported	igd	20.3649
	1	102960989	0.0592004	0.0132244	6.73008e-06	14306	ebi-a-GCST90016927	rs1340391	C	T	0.8082	|| id:ebi-a-GCST90016927	TRUE	reported	igd	20.04
	19	24342250	0.0880978	0.0187002	2.68683e-06	14306	ebi-a-GCST90016927	rs17619981	T	G	0.0656	|| id:ebi-a-GCST90016927	TRUE	reported	igd	22.1941
family Bacteroidaceae id.917	14	22045949	0.0782325	0.0167634	5.01822e-06	14306	ebi-a-GCST90016927	rs2023437	C	T	0.8757	|| id:ebi-a-GCST90016927	TRUE	reported	igd	21.7796
	3	62019400	0.0528153	0.0117124	7.64945e-06	14306	ebi-a-GCST90016927	rs2366421	A	T	0.7664	|| id:ebi-a-GCST90016927	TRUE	reported	igd	20.3342
	9	112855426	0.0607475	0.0129865	3.4209e-06	14306	ebi-a-GCST90016927	rs495004	G	C	0.7903	|| id:ebi-a-GCST90016927	TRUE	reported	igd	21.8813
	20	58605432	0.0812515	0.0164479	6.80973e-07	14306	ebi-a-GCST90016927	rs66474973	G	T	0.1153	|| id:ebi-a-GCST90016927	TRUE	reported	igd	24.4029
	3	77215327	0.0488038	0.0107412	5.8626e-06	14306	ebi-a-GCST90016927	rs66710942	C	T	0.4155	|| id:ebi-a-GCST90016927	TRUE	reported	igd	20.6444
	3	10593224	0.0538565	0.0105251	3.37909e-07	14306	ebi-a-GCST90016927	rs6795673	C	T	0.4115	|| id:ebi-a-GCST90016927	TRUE	reported	igd	26.1833
	13	24910476	0.0604456	0.0129128	2.12711e-06	14306	ebi-a-GCST90016927	rs9507307	C	T	0.1899	|| id:ebi-a-GCST90016927	TRUE	reported	igd	21.9123
	chr.exposure	pos.exposure	beta.exposure	se.exposure	pval.exposure	samplesize.exposure	id.exposure	SNP	effect_allele.exposure	other_allele.exposure	eaf.exposure	exposure	mr_keep.exposure	pval_origin.exposure	data_source.exposure	F Value
	6	151515172	0.123071	0.0275665	9.49008e-06	14306	ebi-a-GCST90016928	rs10872669	G	A	0.8926	|| id:ebi-a-GCST90016928	TRUE	reported	igd	19.9319
	5	164763068	0.0842142	0.0183739	8.77829e-06	14306	ebi-a-GCST90016928	rs11135366	C	G	0.2863	|| id:ebi-a-GCST90016928	TRUE	reported	igd	21.0072
	1	242767252	0.0821108	0.0172701	2.59018e-06	14306	ebi-a-GCST90016928	rs12748533	T	G	0.7028	|| id:ebi-a-GCST90016928	TRUE	reported	igd	22.6053
	2	53139362	0.176187	0.0347133	5.11835e-07	14306	ebi-a-GCST90016928	rs17043785	C	T	0.9404	|| id:ebi-a-GCST90016928	TRUE	reported	igd	25.7606
	15	47340971	0.084048	0.0177806	2.4053e-06	14306	ebi-a-GCST90016928	rs1850003	A	G	0.3072	|| id:ebi-a-GCST90016928	TRUE	reported	igd	22.3441
	3	158653545	0.122574	0.0272389	7.82781e-06	14306	ebi-a-GCST90016928	rs61508842	T	C	0.1223	|| id:ebi-a-GCST90016928	TRUE	reported	igd	20.2497
family Bacteroidales S24 7group id.11173	4	149300138	0.0956546	0.0205228	6.10394e-06	14306	ebi-a-GCST90016928	rs6831034	A	T	0.8022	|| id:ebi-a-GCST90016928	TRUE	reported	igd	21.7239
	17	21205200	0.0843019	0.0187308	8.42946e-06	14306	ebi-a-GCST90016928	rs7217209	C	T	0.173	|| id:ebi-a-GCST90016928	TRUE	reported	igd	20.2564
	22	25943322	0.0847328	0.0165856	3.82164e-07	14306	ebi-a-GCST90016928	rs738193	T	C	0.3549	|| id:ebi-a-GCST90016928	TRUE	reported	igd	26.1
	6	63236747	0.0867065	0.0195709	7.093e-06	14306	ebi-a-GCST90016928	rs78609301	G	A	0.7833	|| id:ebi-a-GCST90016928	TRUE	reported	igd	19.6283
	7	90714667	0.0850266	0.0163382	3.15559e-07	14306	ebi-a-GCST90016928	rs941000	C	T	0.4085	|| id:ebi-a-GCST90016928	TRUE	reported	igd	27.0833
	chr.exposure	pos.exposure	beta.exposure	se.exposure	pval.exposure	samplesize.exposure	id.exposure	SNP	effect_allele.exposure	other_allele.exposure	eaf.exposure	exposure	mr_keep.exposure	pval_origin.exposure	data_source.exposure	F Value
	11	13098051	0.0537537	0.0123746	9.94741e-06	14306	ebi-a-GCST90016929	rs10831953	G	A	0.333	|| id:ebi-a-GCST90016929	TRUE	reported	igd	18.8692
	12	20378911	0.0613031	0.0128844	2.28066e-06	14306	ebi-a-GCST90016929	rs10841473	C	G	0.7296	|| id:ebi-a-GCST90016929	TRUE	reported	igd	22.6379
	4	161211924	0.0562	0.0126395	7.24136e-06	14306	ebi-a-GCST90016929	rs10857328	T	A	0.2972	|| id:ebi-a-GCST90016929	TRUE	reported	igd	19.7703
	17	75348675	0.0586146	0.0129952	5.92461e-06	14306	ebi-a-GCST90016929	rs11655079	C	T	0.7505	|| id:ebi-a-GCST90016929	TRUE	reported	igd	20.3444
	16	898055	0.0810099	0.019073	8.52884e-06	14306	ebi-a-GCST90016929	rs12446429	T	C	0.1362	|| id:ebi-a-GCST90016929	TRUE	reported	igd	18.0401
	2	192878532	0.0584045	0.0122081	1.57373e-06	14306	ebi-a-GCST90016929	rs13020688	G	A	0.3529	|| id:ebi-a-GCST90016929	TRUE	reported	igd	22.8874
	2	136616754	0.11707	0.0126703	5.94155e-20	14306	ebi-a-GCST90016929	rs182549	C	T	0.4911	|| id:ebi-a-GCST90016929	TRUE	reported	igd	85.3724
	2	137602926	0.0688125	0.0131699	1.69731e-07	14306	ebi-a-GCST90016929	rs1961273	C	T	0.2714	|| id:ebi-a-GCST90016929	TRUE	reported	igd	27.3004
family Bifidobacteriaceae id.433	2	49906864	0.0577763	0.0117388	8.88055e-07	14306	ebi-a-GCST90016929	rs4567981	T	A	0.4394	|| id:ebi-a-GCST90016929	TRUE	reported	igd	24.2243
	5	521096	0.0569873	0.0116907	1.1517e-06	14306	ebi-a-GCST90016929	rs4957061	T	C	0.4652	|| id:ebi-a-GCST90016929	TRUE	reported	igd	23.7616
	17	72897722	0.0632518	0.013817	5.36809e-06	14306	ebi-a-GCST90016929	rs540489	G	T	0.7664	|| id:ebi-a-GCST90016929	TRUE	reported	igd	20.9565
	4	1517826	0.053673	0.0120586	8.66204e-06	14306	ebi-a-GCST90016929	rs55888705	A	G	0.3867	|| id:ebi-a-GCST90016929	TRUE	reported	igd	19.8115
	18	4304187	0.0728589	0.0164821	6.00109e-06	14306	ebi-a-GCST90016929	rs677208	G	C	0.17	|| id:ebi-a-GCST90016929	TRUE	reported	igd	19.5407
	6	97406220	0.0914312	0.0202604	7.27998e-06	14306	ebi-a-GCST90016929	rs6899771	G	A	0.9046	|| id:ebi-a-GCST90016929	TRUE	reported	igd	20.3654
	15	92463303	0.0551726	0.0124655	6.86784e-06	14306	ebi-a-GCST90016929	rs7174549	C	T	0.3559	|| id:ebi-a-GCST90016929	TRUE	reported	igd	19.5897
	13	112859829	0.110676	0.0200996	1.74032e-08	14306	ebi-a-GCST90016929	rs7322849	T	C	0.0964	|| id:ebi-a-GCST90016929	TRUE	reported	igd	30.3202
	5	142793467	0.0942612	0.0208421	4.84953e-06	14306	ebi-a-GCST90016929	rs73797465	G	T	0.9135	|| id:ebi-a-GCST90016929	TRUE	reported	igd	20.4542
	2	189805077	0.060716	0.0130605	3.73044e-06	14306	ebi-a-GCST90016929	rs7588568	C	A	0.7187	|| id:ebi-a-GCST90016929	TRUE	reported	igd	21.6116
	5	169748189	0.0892981	0.0183177	1.03631e-06	14306	ebi-a-GCST90016929	rs76671854	G	C	0.8748	|| id:ebi-a-GCST90016929	TRUE	reported	igd	23.7653
	6	14617591	0.0553965	0.0120669	3.8249e-06	14306	ebi-a-GCST90016929	rs857444	C	T	0.3608	|| id:ebi-a-GCST90016929	TRUE	reported	igd	21.0753
	chr.exposure	pos.exposure	beta.exposure	se.exposure	pval.exposure	samplesize.exposure	id.exposure	SNP	effect_allele.exposure	other_allele.exposure	eaf.exposure	exposure	mr_keep.exposure	pval_origin.exposure	data_source.exposure	F Value
	1	101804809	0.0536759	0.0119436	8.09823e-06	14306	ebi-a-GCST90016931	rs10875374	T	C	0.5517	|| id:ebi-a-GCST90016931	TRUE	reported	igd	20.1971
	3	132596627	0.0748236	0.016246	5.33962e-06	14306	ebi-a-GCST90016931	rs12186080	G	A	0.161	|| id:ebi-a-GCST90016931	TRUE	reported	igd	21.2121
	9	136710881	0.0814503	0.0179338	4.54485e-06	14306	ebi-a-GCST90016931	rs12341505	G	A	0.1113	|| id:ebi-a-GCST90016931	TRUE	reported	igd	20.6272
	3	111482845	0.0616944	0.013693	6.9051e-06	14306	ebi-a-GCST90016931	rs12490337	G	C	0.7545	|| id:ebi-a-GCST90016931	TRUE	reported	igd	20.2999
family Clostridiaceae1 id.1869	10	43270264	0.180969	0.0390911	3.80627e-06	14306	ebi-a-GCST90016931	rs2795528	A	G	0.9513	|| id:ebi-a-GCST90016931	TRUE	reported	igd	21.4315
	1	3041519	0.0563367	0.012392	5.27024e-06	14306	ebi-a-GCST90016931	rs2817172	C	T	0.4125	|| id:ebi-a-GCST90016931	TRUE	reported	igd	20.6681
	7	30934659	0.106376	0.0241944	7.42147e-06	14306	ebi-a-GCST90016931	rs4723021	C	T	0.9423	|| id:ebi-a-GCST90016931	TRUE	reported	igd	19.3311
	6	165722832	0.0734787	0.0168383	7.0912e-06	14306	ebi-a-GCST90016931	rs550843	C	T	0.8509	|| id:ebi-a-GCST90016931	TRUE	reported	igd	19.0426
	16	87710690	0.0967773	0.0217471	8.24442e-06	14306	ebi-a-GCST90016931	rs56188186	A	G	0.0755	|| id:ebi-a-GCST90016931	TRUE	reported	igd	19.8036
	6	48093014	0.0615805	0.0136198	9.07716e-06	14306	ebi-a-GCST90016931	rs62397761	A	G	0.2863	|| id:ebi-a-GCST90016931	TRUE	reported	igd	20.443
	22	47806774	0.0533035	0.0119011	7.8966e-06	14306	ebi-a-GCST90016931	rs881532	G	A	0.5229	|| id:ebi-a-GCST90016931	TRUE	reported	igd	20.0603
	chr.exposure	pos.exposure	beta.exposure	se.exposure	pval.exposure	samplesize.exposure	id.exposure	SNP	effect_allele.exposure	other_allele.exposure	eaf.exposure	exposure	mr_keep.exposure	pval_origin.exposure	data_source.exposure	F Value
	4	155632958	0.0626993	0.0139364	6.82763e-06	14306	ebi-a-GCST90016932	rs10517600	T	G	0.5358	|| id:ebi-a-GCST90016932	TRUE	reported	igd	20.2406
	10	6714424	0.0672314	0.0147123	5.04836e-06	14306	ebi-a-GCST90016932	rs10904722	T	C	0.7187	|| id:ebi-a-GCST90016932	TRUE	reported	igd	20.8825
	8	123977538	0.214464	0.0455098	3.43598e-06	14306	ebi-a-GCST90016932	rs118104867	C	T	0.0487	|| id:ebi-a-GCST90016932	TRUE	reported	igd	22.2075
	2	205616346	0.165419	0.0352154	4.3723e-06	14306	ebi-a-GCST90016932	rs13409132	G	A	0.9553	|| id:ebi-a-GCST90016932	TRUE	reported	igd	22.0651
	14	85856796	0.0769254	0.0172234	7.91425e-06	14306	ebi-a-GCST90016932	rs17121075	G	A	0.168	|| id:ebi-a-GCST90016932	TRUE	reported	igd	19.9481
	2	229942951	0.0746375	0.0159136	2.50196e-06	14306	ebi-a-GCST90016932	rs2191834	G	T	0.2396	|| id:ebi-a-GCST90016932	TRUE	reported	igd	21.9977
family Clostridiales vadin BB60 group id.11286	17	58149405	0.137134	0.0266996	6.95697e-07	14306	ebi-a-GCST90016932	rs28691777	C	T	0.0716	|| id:ebi-a-GCST90016932	TRUE	reported	igd	26.3804
	5	4308946	0.117807	0.026924	7.66214e-06	14306	ebi-a-GCST90016932	rs34088226	G	A	0.9294	|| id:ebi-a-GCST90016932	TRUE	reported	igd	19.1453
	15	87392290	0.131519	0.0261319	4.97038e-07	14306	ebi-a-GCST90016932	rs55682560	T	C	0.9304	|| id:ebi-a-GCST90016932	TRUE	reported	igd	25.33
	1	56849539	0.0662317	0.0138147	1.79287e-06	14306	ebi-a-GCST90016932	rs6588624	A	G	0.5288	|| id:ebi-a-GCST90016932	TRUE	reported	igd	22.9852
	8	3305122	0.116908	0.0252447	4.85333e-06	14306	ebi-a-GCST90016932	rs66714985	A	C	0.0845	|| id:ebi-a-GCST90016932	TRUE	reported	igd	21.4461
	2	202450739	0.0613825	0.0138976	9.33061e-06	14306	ebi-a-GCST90016932	rs6755871	G	C	0.507	|| id:ebi-a-GCST90016932	TRUE	reported	igd	19.5079
	18	74373125	0.0643682	0.0138701	3.58286e-06	14306	ebi-a-GCST90016932	rs7226487	G	A	0.5239	|| id:ebi-a-GCST90016932	TRUE	reported	igd	21.5369
	1	71391694	0.078598	0.0165982	2.36706e-06	14306	ebi-a-GCST90016932	rs7538034	G	T	0.7922	|| id:ebi-a-GCST90016932	TRUE	reported	igd	22.4234
	5	142244898	0.116224	0.0240367	3.94357e-06	14306	ebi-a-GCST90016932	rs7725895	G	A	0.9105	|| id:ebi-a-GCST90016932	TRUE	reported	igd	23.3799
	3	15564453	0.070194	0.0155364	6.84715e-06	14306	ebi-a-GCST90016932	rs989682	A	G	0.2823	|| id:ebi-a-GCST90016932	TRUE	reported	igd	20.4126
	21	38612024	0.0738925	0.0150911	1.05271e-06	14306	ebi-a-GCST90016932	rs9979874	C	G	0.7127	|| id:ebi-a-GCST90016932	TRUE	reported	igd	23.975
	chr.exposure	pos.exposure	beta.exposure	se.exposure	pval.exposure	samplesize.exposure	id.exposure	SNP	effect_allele.exposure	other_allele.exposure	eaf.exposure	exposure	mr_keep.exposure	pval_origin.exposure	data_source.exposure	F Value
	15	86433579	0.0510212	0.0114339	8.14442e-06	14306	ebi-a-GCST90016933	rs11073596	T	G	0.34	|| id:ebi-a-GCST90016933	TRUE	reported	igd	19.9119
	10	1922731	0.06075	0.0130939	4.82848e-06	14306	ebi-a-GCST90016933	rs11250875	T	C	0.2087	|| id:ebi-a-GCST90016933	TRUE	reported	igd	21.5256
	17	8121332	0.0773006	0.017553	8.0201e-06	14306	ebi-a-GCST90016933	rs11656361	A	C	0.1292	|| id:ebi-a-GCST90016933	TRUE	reported	igd	19.3938
	19	52895166	0.0789796	0.0177205	8.51236e-06	14306	ebi-a-GCST90016933	rs12974142	G	A	0.1083	|| id:ebi-a-GCST90016933	TRUE	reported	igd	19.8645
	7	105084680	0.0565686	0.0126265	7.79938e-06	14306	ebi-a-GCST90016933	rs13307134	C	T	0.2356	|| id:ebi-a-GCST90016933	TRUE	reported	igd	20.0717
	5	90471451	0.0498855	0.0112446	9.77372e-06	14306	ebi-a-GCST90016933	rs1397793	A	G	0.6143	|| id:ebi-a-GCST90016933	TRUE	reported	igd	19.6816
	12	11494021	0.0586265	0.0129006	4.84117e-06	14306	ebi-a-GCST90016933	rs1816223	G	A	0.7893	|| id:ebi-a-GCST90016933	TRUE	reported	igd	20.6523
	1	176571431	0.0603429	0.0126849	1.51604e-06	14306	ebi-a-GCST90016933	rs240104	C	T	0.7555	|| id:ebi-a-GCST90016933	TRUE	reported	igd	22.6297
family Coriobacteriaceae id.811	3	11654412	0.116408	0.0258545	9.02693e-06	14306	ebi-a-GCST90016933	rs2442778	A	G	0.9543	|| id:ebi-a-GCST90016933	TRUE	reported	igd	20.2718
	9	136512906	0.0926543	0.0209468	8.26913e-06	14306	ebi-a-GCST90016933	rs3025411	A	G	0.1044	|| id:ebi-a-GCST90016933	TRUE	reported	igd	19.5657
	17	37376685	0.0965017	0.0207666	3.88356e-06	14306	ebi-a-GCST90016933	rs34739816	G	T	0.0815	|| id:ebi-a-GCST90016933	TRUE	reported	igd	21.5943
	19	55857777	0.0504262	0.0113307	9.71449e-06	14306	ebi-a-GCST90016933	rs45480394	G	T	0.6382	|| id:ebi-a-GCST90016933	TRUE	reported	igd	19.8061
	10	1223742	0.056503	0.0125055	5.89508e-06	14306	ebi-a-GCST90016933	rs4880783	G	T	0.2117	|| id:ebi-a-GCST90016933	TRUE	reported	igd	20.4146
	7	24464799	0.0486059	0.0108982	7.87281e-06	14306	ebi-a-GCST90016933	rs62448869	A	T	0.5398	|| id:ebi-a-GCST90016933	TRUE	reported	igd	19.8915
	20	62072077	0.0714367	0.0154113	5.39126e-06	14306	ebi-a-GCST90016933	rs67561917	G	A	0.8579	|| id:ebi-a-GCST90016933	TRUE	reported	igd	21.4864
	10	65799217	0.0778402	0.0155815	5.43313e-07	14306	ebi-a-GCST90016933	rs719099	A	G	0.1362	|| id:ebi-a-GCST90016933	TRUE	reported	igd	24.9568
	1	179629191	0.0483227	0.0109062	9.62144e-06	14306	ebi-a-GCST90016933	rs7540303	C	T	0.4215	|| id:ebi-a-GCST90016933	TRUE	reported	igd	19.6316
	5	125460084	0.0774888	0.0171877	5.63093e-06	14306	ebi-a-GCST90016933	rs76779974	C	G	0.1123	|| id:ebi-a-GCST90016933	TRUE	reported	igd	20.3256
	10	5644995	0.0731501	0.0164186	5.24675e-06	14306	ebi-a-GCST90016933	rs7898585	T	C	0.1262	|| id:ebi-a-GCST90016933	TRUE	reported	igd	19.8499
	5	459415	0.25584	0.0561995	4.65693e-06	14306	ebi-a-GCST90016933	rs80046645	C	G	0.0408	|| id:ebi-a-GCST90016933	TRUE	reported	igd	20.7239
	14	39660509	0.103377	0.0229286	6.8962e-06	14306	ebi-a-GCST90016933	rs8010111	A	G	0.9354	|| id:ebi-a-GCST90016933	TRUE	reported	igd	20.3279
	chr.exposure	pos.exposure	beta.exposure	se.exposure	pval.exposure	samplesize.exposure	id.exposure	SNP	effect_allele.exposure	other_allele.exposure	eaf.exposure	exposure	mr_keep.exposure	pval_origin.exposure	data_source.exposure	F Value
	9	8786663	0.110761	0.0232545	2.7503e-06	14306	ebi-a-GCST90016934	rs112893842	T	C	0.0974	|| id:ebi-a-GCST90016934	TRUE	reported	igd	22.6861
	1	118723685	0.0801923	0.0167061	1.692e-06	14306	ebi-a-GCST90016934	rs1582238	T	C	0.3718	|| id:ebi-a-GCST90016934	TRUE	reported	igd	23.0417
	4	122202910	0.134314	0.0292201	4.58121e-06	14306	ebi-a-GCST90016934	rs17051335	T	C	0.9205	|| id:ebi-a-GCST90016934	TRUE	reported	igd	21.129
	18	59026148	0.070223	0.0156601	7.85905e-06	14306	ebi-a-GCST90016934	rs1908593	T	C	0.5378	|| id:ebi-a-GCST90016934	TRUE	reported	igd	20.108
	7	79734541	0.107106	0.0238173	5.56327e-06	14306	ebi-a-GCST90016934	rs28696126	T	A	0.8082	|| id:ebi-a-GCST90016934	TRUE	reported	igd	20.2229
family Defluviitaleaceae id.1924	10	66407366	0.0708803	0.0156121	5.86017e-06	14306	ebi-a-GCST90016934	rs4344384	G	T	0.4742	|| id:ebi-a-GCST90016934	TRUE	reported	igd	20.6124
	3	72207794	0.0977203	0.0197033	9.42193e-07	14306	ebi-a-GCST90016934	rs4677103	A	G	0.171	|| id:ebi-a-GCST90016934	TRUE	reported	igd	24.5975
	9	93331308	0.123954	0.0289814	9.48135e-06	14306	ebi-a-GCST90016934	rs540220	C	T	0.9404	|| id:ebi-a-GCST90016934	TRUE	reported	igd	18.2929
	21	41811003	0.177314	0.0361844	1.40608e-06	14306	ebi-a-GCST90016934	rs55658617	T	C	0.0696	|| id:ebi-a-GCST90016934	TRUE	reported	igd	24.0128
	4	147414743	0.149751	0.0293415	2.75778e-07	14306	ebi-a-GCST90016934	rs72731813	T	C	0.9185	|| id:ebi-a-GCST90016934	TRUE	reported	igd	26.048
	22	24804081	0.139014	0.0299429	4.60829e-06	14306	ebi-a-GCST90016934	rs9608282	T	G	0.0656	|| id:ebi-a-GCST90016934	TRUE	reported	igd	21.5541
	1	85205632	0.138357	0.0295185	3.41374e-06	14306	ebi-a-GCST90016934	rs9725395	G	A	0.9125	|| id:ebi-a-GCST90016934	TRUE	reported	igd	21.9692
	chr.exposure	pos.exposure	beta.exposure	se.exposure	pval.exposure	samplesize.exposure	id.exposure	SNP	effect_allele.exposure	other_allele.exposure	eaf.exposure	exposure	mr_keep.exposure	pval_origin.exposure	data_source.exposure	F Value
	9	15269705	0.211435	0.0456962	2.81877e-06	14306	ebi-a-GCST90016935	rs112381107	C	T	0.0477	|| id:ebi-a-GCST90016935	TRUE	reported	igd	21.4089
	10	11855599	0.0555931	0.0117493	2.49701e-06	14306	ebi-a-GCST90016935	rs11599763	C	T	0.6103	|| id:ebi-a-GCST90016935	TRUE	reported	igd	22.3881
	1	203308383	0.0732697	0.0150964	2.39651e-06	14306	ebi-a-GCST90016935	rs16851319	C	G	0.8131	|| id:ebi-a-GCST90016935	TRUE	reported	igd	23.556
	9	81834426	0.0729251	0.0154381	2.09677e-06	14306	ebi-a-GCST90016935	rs17791387	G	A	0.8588	|| id:ebi-a-GCST90016935	TRUE	reported	igd	22.3134
	1	203991605	0.114231	0.0253568	1.5639e-06	14306	ebi-a-GCST90016935	rs2692012	A	G	0.0636	|| id:ebi-a-GCST90016935	TRUE	reported	igd	20.2945
family Desulfovibrionaceae id.3169	21	45064961	0.0571419	0.012423	3.82375e-06	14306	ebi-a-GCST90016935	rs2838334	G	A	0.3231	|| id:ebi-a-GCST90016935	TRUE	reported	igd	21.1571
	2	233929283	0.0525838	0.0115757	6.78141e-06	14306	ebi-a-GCST90016935	rs3935584	T	C	0.504	|| id:ebi-a-GCST90016935	TRUE	reported	igd	20.6352
	17	2856662	0.0943381	0.020138	3.16046e-06	14306	ebi-a-GCST90016935	rs4506934	T	C	0.8877	|| id:ebi-a-GCST90016935	TRUE	reported	igd	21.9453
	20	33694801	0.0834742	0.0166111	2.69911e-07	14306	ebi-a-GCST90016935	rs6058181	C	T	0.1233	|| id:ebi-a-GCST90016935	TRUE	reported	igd	25.2527
	15	96159374	0.0574455	0.0129468	7.34345e-06	14306	ebi-a-GCST90016935	rs7164160	T	A	0.7416	|| id:ebi-a-GCST90016935	TRUE	reported	igd	19.6873
	8	57865378	0.0770089	0.017089	9.60882e-06	14306	ebi-a-GCST90016935	rs72647048	C	T	0.8837	|| id:ebi-a-GCST90016935	TRUE	reported	igd	20.3071
	16	71541641	0.0541732	0.0117819	4.48477e-06	14306	ebi-a-GCST90016935	rs9928243	A	C	0.5746	|| id:ebi-a-GCST90016935	TRUE	reported	igd	21.1416
	chr.exposure	pos.exposure	beta.exposure	se.exposure	pval.exposure	samplesize.exposure	id.exposure	SNP	effect_allele.exposure	other_allele.exposure	eaf.exposure	exposure	mr_keep.exposure	pval_origin.exposure	data_source.exposure	F Value
	11	22379097	0.0822408	0.0186379	9.42692e-06	14306	ebi-a-GCST90016936	rs11026530	T	C	0.1342	|| id:ebi-a-GCST90016936	TRUE	reported	igd	19.4707
	11	2563450	0.110561	0.0241719	3.65359e-06	14306	ebi-a-GCST90016936	rs111229068	A	T	0.1054	|| id:ebi-a-GCST90016936	TRUE	reported	igd	20.921
	2	42133542	0.0582927	0.0126195	4.51617e-06	14306	ebi-a-GCST90016936	rs2374342	C	A	0.3569	|| id:ebi-a-GCST90016936	TRUE	reported	igd	21.3375
	16	54327745	0.0899642	0.0202934	7.63115e-06	14306	ebi-a-GCST90016936	rs35673018	G	A	0.0944	|| id:ebi-a-GCST90016936	TRUE	reported	igd	19.653
	17	13521040	0.115598	0.0257683	9.48965e-06	14306	ebi-a-GCST90016936	rs4792380	A	T	0.0517	|| id:ebi-a-GCST90016936	TRUE	reported	igd	20.1247
family Enterobacteriaceae id.3469	18	55145547	0.084159	0.0189479	5.17095e-06	14306	ebi-a-GCST90016936	rs504442	T	G	0.1392	|| id:ebi-a-GCST90016936	TRUE	reported	igd	19.7278
	14	27718039	0.0605392	0.0133696	8.53532e-06	14306	ebi-a-GCST90016936	rs61973590	G	C	0.7058	|| id:ebi-a-GCST90016936	TRUE	reported	igd	20.5039
	20	55340092	0.0606754	0.0130125	3.13163e-06	14306	ebi-a-GCST90016936	rs62210023	A	G	0.3519	|| id:ebi-a-GCST90016936	TRUE	reported	igd	21.7422
	18	57672335	0.0848521	0.0170415	1.19564e-06	14306	ebi-a-GCST90016936	rs78143293	G	A	0.8559	|| id:ebi-a-GCST90016936	TRUE	reported	igd	24.7919
	13	110840418	0.0758597	0.0171286	9.31859e-06	14306	ebi-a-GCST90016936	rs79757635	C	A	0.161	|| id:ebi-a-GCST90016936	TRUE	reported	igd	19.6146
	2	4015933	0.0990404	0.0215877	6.95312e-06	14306	ebi-a-GCST90016936	rs80319214	C	G	0.1153	|| id:ebi-a-GCST90016936	TRUE	reported	igd	21.0481
	chr.exposure	pos.exposure	beta.exposure	se.exposure	pval.exposure	samplesize.exposure	id.exposure	SNP	effect_allele.exposure	other_allele.exposure	eaf.exposure	exposure	mr_keep.exposure	pval_origin.exposure	data_source.exposure	F Value
	5	3002546	0.0492438	0.010887	6.14582e-06	14306	ebi-a-GCST90016937	rs1074800	A	G	0.3986	|| id:ebi-a-GCST90016937	TRUE	reported	igd	20.4591
	10	133897233	0.0552212	0.0116074	2.33115e-06	14306	ebi-a-GCST90016937	rs10781552	T	C	0.6879	|| id:ebi-a-GCST90016937	TRUE	reported	igd	22.633
	13	40385457	0.10305	0.0224648	2.79126e-06	14306	ebi-a-GCST90016937	rs17530232	A	G	0.0765	|| id:ebi-a-GCST90016937	TRUE	reported	igd	21.0422
	1	64139196	0.0475363	0.0106939	9.52708e-06	14306	ebi-a-GCST90016937	rs1884466	T	C	0.5487	|| id:ebi-a-GCST90016937	TRUE	reported	igd	19.7596
	3	195793712	0.0524152	0.0106784	8.95468e-07	14306	ebi-a-GCST90016937	rs2300774	G	A	0.4076	|| id:ebi-a-GCST90016937	TRUE	reported	igd	24.0936
	1	97457427	0.0497374	0.0111376	8.02897e-06	14306	ebi-a-GCST90016937	rs290833	G	T	0.6312	|| id:ebi-a-GCST90016937	TRUE	reported	igd	19.9427
	17	70327224	0.0806041	0.0167641	1.8451e-06	14306	ebi-a-GCST90016937	rs35161940	C	T	0.8728	|| id:ebi-a-GCST90016937	TRUE	reported	igd	23.1182
family Erysipelotrichaceae id.2149	14	48997206	0.0608929	0.0133764	4.23107e-06	14306	ebi-a-GCST90016937	rs4078432	T	C	0.8191	|| id:ebi-a-GCST90016937	TRUE	reported	igd	20.7231
	14	80357610	0.0724145	0.0164471	5.40344e-06	14306	ebi-a-GCST90016937	rs56970041	T	G	0.1113	|| id:ebi-a-GCST90016937	TRUE	reported	igd	19.3853
	8	38803551	0.0681159	0.0127883	1.12264e-07	14306	ebi-a-GCST90016937	rs62504403	C	T	0.2356	|| id:ebi-a-GCST90016937	TRUE	reported	igd	28.3708
	18	5830507	0.0945759	0.0194091	9.12347e-07	14306	ebi-a-GCST90016937	rs7234058	C	T	0.9026	|| id:ebi-a-GCST90016937	TRUE	reported	igd	23.7438
	8	2954952	0.0839071	0.0199131	9.28453e-06	14306	ebi-a-GCST90016937	rs7826267	G	T	0.9254	|| id:ebi-a-GCST90016937	TRUE	reported	igd	17.755
	14	56156504	0.0538798	0.0116888	4.08479e-06	14306	ebi-a-GCST90016937	rs8003149	C	T	0.2823	|| id:ebi-a-GCST90016937	TRUE	reported	igd	21.2477
	chr.exposure	pos.exposure	beta.exposure	se.exposure	pval.exposure	samplesize.exposure	id.exposure	SNP	effect_allele.exposure	other_allele.exposure	eaf.exposure	exposure	mr_keep.exposure	pval_origin.exposure	data_source.exposure	F Value
	9	115821485	0.162115	0.032151	5.78309e-07	14306	ebi-a-GCST90016938	rs10759623	T	C	0.8191	|| id:ebi-a-GCST90016938	TRUE	reported	igd	25.4248
	7	148921732	0.177599	0.0372795	2.70222e-06	14306	ebi-a-GCST90016938	rs11547158	G	A	0.8797	|| id:ebi-a-GCST90016938	TRUE	reported	igd	22.6956
	11	35334668	0.116383	0.0252125	3.97109e-06	14306	ebi-a-GCST90016938	rs17379710	C	T	0.5646	|| id:ebi-a-GCST90016938	TRUE	reported	igd	21.3082
	11	95357209	0.150538	0.0302319	6.63437e-07	14306	ebi-a-GCST90016938	rs2155352	G	A	0.7714	|| id:ebi-a-GCST90016938	TRUE	reported	igd	24.7948
family Family XI id.1936	18	43345864	0.112486	0.0251099	9.42671e-06	14306	ebi-a-GCST90016938	rs2156611	C	T	0.508	|| id:ebi-a-GCST90016938	TRUE	reported	igd	20.0681
	4	119955787	0.128253	0.0274718	3.38556e-06	14306	ebi-a-GCST90016938	rs3733511	A	G	0.2942	|| id:ebi-a-GCST90016938	TRUE	reported	igd	21.7952
	1	239995451	0.117998	0.025516	4.79789e-06	14306	ebi-a-GCST90016938	rs488164	T	G	0.3837	|| id:ebi-a-GCST90016938	TRUE	reported	igd	21.3857
	20	55348292	0.118619	0.0261969	7.07082e-06	14306	ebi-a-GCST90016938	rs6025153	G	C	0.3738	|| id:ebi-a-GCST90016938	TRUE	reported	igd	20.5026
	16	54115200	0.117677	0.0251491	3.19374e-06	14306	ebi-a-GCST90016938	rs697771	G	A	0.5676	|| id:ebi-a-GCST90016938	TRUE	reported	igd	21.8947
	16	64956642	0.224835	0.0511672	8.4126e-06	14306	ebi-a-GCST90016938	rs78222136	G	C	0.0805	|| id:ebi-a-GCST90016938	TRUE	reported	igd	19.3083
	chr.exposure	pos.exposure	beta.exposure	se.exposure	pval.exposure	samplesize.exposure	id.exposure	SNP	effect_allele.exposure	other_allele.exposure	eaf.exposure	exposure	mr_keep.exposure	pval_origin.exposure	data_source.exposure	F Value
	19	16174657	0.0503183	0.011165	6.99021e-06	14306	ebi-a-GCST90016939	rs10404377	A	C	0.5775	|| id:ebi-a-GCST90016939	TRUE	reported	igd	20.3111
	10	102366896	0.151619	0.0317112	1.80356e-06	14306	ebi-a-GCST90016939	rs118170811	A	G	0.0398	|| id:ebi-a-GCST90016939	TRUE	reported	igd	22.8603
	4	162211872	0.0550907	0.0116474	2.41524e-06	14306	ebi-a-GCST90016939	rs12643275	T	A	0.6501	|| id:ebi-a-GCST90016939	TRUE	reported	igd	22.3717
	15	94105415	0.0851896	0.0192688	7.67414e-06	14306	ebi-a-GCST90016939	rs12904405	G	A	0.8976	|| id:ebi-a-GCST90016939	TRUE	reported	igd	19.5463
	1	65170838	0.0579979	0.0129602	9.65384e-06	14306	ebi-a-GCST90016939	rs1887048	G	A	0.2237	|| id:ebi-a-GCST90016939	TRUE	reported	igd	20.0263
	21	19685992	0.0637366	0.013927	2.53805e-06	14306	ebi-a-GCST90016939	rs1999289	T	A	0.7495	|| id:ebi-a-GCST90016939	TRUE	reported	igd	20.9441
	15	50802980	0.0508511	0.011014	4.04027e-06	14306	ebi-a-GCST90016939	rs3098182	G	T	0.4324	|| id:ebi-a-GCST90016939	TRUE	reported	igd	21.3162
family Family XIII id.1957	3	32373530	0.112091	0.0271305	8.38475e-06	14306	ebi-a-GCST90016939	rs4293737	G	A	0.7734	|| id:ebi-a-GCST90016939	TRUE	reported	igd	17.0697
	1	166557202	0.0596528	0.012717	3.72349e-06	14306	ebi-a-GCST90016939	rs482905	G	T	0.2495	|| id:ebi-a-GCST90016939	TRUE	reported	igd	22.0035
	17	70218627	0.0561559	0.0115587	1.23726e-06	14306	ebi-a-GCST90016939	rs6501525	A	G	0.3857	|| id:ebi-a-GCST90016939	TRUE	reported	igd	23.6033
	1	39212021	0.0651136	0.0144251	8.08295e-06	14306	ebi-a-GCST90016939	rs66753613	G	A	0.2048	|| id:ebi-a-GCST90016939	TRUE	reported	igd	20.3754
	3	88995218	0.0805985	0.0171364	4.89283e-06	14306	ebi-a-GCST90016939	rs6797051	T	C	0.8827	|| id:ebi-a-GCST90016939	TRUE	reported	igd	22.1215
	10	7906746	0.0516394	0.0112313	4.76091e-06	14306	ebi-a-GCST90016939	rs7076829	A	T	0.5795	|| id:ebi-a-GCST90016939	TRUE	reported	igd	21.1399
	1	186914023	0.0663236	0.0141626	3.91643e-06	14306	ebi-a-GCST90016939	rs7514702	C	T	0.8231	|| id:ebi-a-GCST90016939	TRUE	reported	igd	21.9306
	chr.exposure	pos.exposure	beta.exposure	se.exposure	pval.exposure	samplesize.exposure	id.exposure	SNP	effect_allele.exposure	other_allele.exposure	eaf.exposure	exposure	mr_keep.exposure	pval_origin.exposure	data_source.exposure	F Value
	19	13425799	0.0661701	0.014851	7.58351e-06	14306	ebi-a-GCST90016940	rs10402491	C	T	0.1203	|| id:ebi-a-GCST90016940	TRUE	reported	igd	19.8524
	9	72179847	0.0494463	0.0110503	4.26265e-06	14306	ebi-a-GCST90016940	rs11139361	T	C	0.3628	|| id:ebi-a-GCST90016940	TRUE	reported	igd	20.0226
	17	80469064	0.0549584	0.0117086	2.41835e-06	14306	ebi-a-GCST90016940	rs112040820	A	G	0.2704	|| id:ebi-a-GCST90016940	TRUE	reported	igd	22.0322
	6	161957425	0.049227	0.0104894	2.6898e-06	14306	ebi-a-GCST90016940	rs11755180	G	C	0.4702	|| id:ebi-a-GCST90016940	TRUE	reported	igd	22.0245
	13	38004672	0.0718128	0.017462	9.57767e-06	14306	ebi-a-GCST90016940	rs11841382	T	G	0.9264	|| id:ebi-a-GCST90016940	TRUE	reported	igd	16.9128
	7	130436459	0.0500924	0.0105069	1.81844e-06	14306	ebi-a-GCST90016940	rs11979110	C	T	0.5527	|| id:ebi-a-GCST90016940	TRUE	reported	igd	22.7297
family Lachnospiraceae id.1987	20	36876868	0.0501415	0.0112157	7.28836e-06	14306	ebi-a-GCST90016940	rs1205443	A	G	0.336	|| id:ebi-a-GCST90016940	TRUE	reported	igd	19.9867
	1	117031337	0.0515295	0.01067	1.42945e-06	14306	ebi-a-GCST90016940	rs12562372	T	G	0.4612	|| id:ebi-a-GCST90016940	TRUE	reported	igd	23.3229
	1	214031969	0.0484566	0.0107934	7.26742e-06	14306	ebi-a-GCST90016940	rs12760724	C	A	0.6561	|| id:ebi-a-GCST90016940	TRUE	reported	igd	20.1553
	2	232469722	0.0993483	0.0218395	8.37067e-06	14306	ebi-a-GCST90016940	rs13005175	A	G	0.0885	|| id:ebi-a-GCST90016940	TRUE	reported	igd	20.6936
	6	46664437	0.215114	0.0476778	6.53236e-06	14306	ebi-a-GCST90016940	rs146660815	C	T	0.9453	|| id:ebi-a-GCST90016940	TRUE	reported	igd	20.3566
	4	10245354	0.0585831	0.0128742	3.69556e-06	14306	ebi-a-GCST90016940	rs2159863	G	A	0.8022	|| id:ebi-a-GCST90016940	TRUE	reported	igd	20.7064
	5	32348593	0.160302	0.035832	8.41977e-06	14306	ebi-a-GCST90016940	rs2910921	T	C	0.0447	|| id:ebi-a-GCST90016940	TRUE	reported	igd	20.0141
	10	103392503	0.0503537	0.0112201	6.20326e-06	14306	ebi-a-GCST90016940	rs3127230	T	C	0.666	|| id:ebi-a-GCST90016940	TRUE	reported	igd	20.1405
	9	100113683	0.0607481	0.0125216	2.44997e-06	14306	ebi-a-GCST90016940	rs35524804	C	T	0.7326	|| id:ebi-a-GCST90016940	TRUE	reported	igd	23.5367
	19	29408858	0.0503142	0.0112482	5.35895e-06	14306	ebi-a-GCST90016940	rs7359994	C	T	0.668	|| id:ebi-a-GCST90016940	TRUE	reported	igd	20.0085
	9	133791605	0.0776723	0.0164472	3.01426e-06	14306	ebi-a-GCST90016940	rs79086868	T	C	0.1093	|| id:ebi-a-GCST90016940	TRUE	reported	igd	22.3022
	4	186906801	0.0493666	0.0107801	5.16952e-06	14306	ebi-a-GCST90016940	rs959845	T	C	0.5547	|| id:ebi-a-GCST90016940	TRUE	reported	igd	20.9711
	16	76559184	0.125721	0.0245233	2.83596e-07	14306	ebi-a-GCST90016940	rs9929145	A	G	0.9384	|| id:ebi-a-GCST90016940	TRUE	reported	igd	26.282
	chr.exposure	pos.exposure	beta.exposure	se.exposure	pval.exposure	samplesize.exposure	id.exposure	SNP	effect_allele.exposure	other_allele.exposure	eaf.exposure	exposure	mr_keep.exposure	pval_origin.exposure	data_source.exposure	F Value
	2	28903275	0.0830224	0.0175267	2.59543e-06	14306	ebi-a-GCST90016941	rs11674854	T	C	0.5726	|| id:ebi-a-GCST90016941	TRUE	reported	igd	22.4383
	2	135755629	0.0772453	0.0176921	9.6525e-06	14306	ebi-a-GCST90016941	rs1530559	G	A	0.5676	|| id:ebi-a-GCST90016941	TRUE	reported	igd	19.0627
	13	23836941	0.10381	0.0220135	3.89933e-06	14306	ebi-a-GCST90016941	rs1590596	G	C	0.7913	|| id:ebi-a-GCST90016941	TRUE	reported	igd	22.2382
	1	18501459	0.193287	0.0379293	2.70128e-07	14306	ebi-a-GCST90016941	rs16861661	A	G	0.9503	|| id:ebi-a-GCST90016941	TRUE	reported	igd	25.969
	16	73890910	0.082529	0.0168225	8.69121e-07	14306	ebi-a-GCST90016941	rs328312	T	A	0.4473	|| id:ebi-a-GCST90016941	TRUE	reported	igd	24.0676
family Lactobacillaceae id.1836	20	54192992	0.0825646	0.0170282	1.38159e-06	14306	ebi-a-GCST90016941	rs6092149	T	A	0.5567	|| id:ebi-a-GCST90016941	TRUE	reported	igd	23.5099
	4	109896462	0.177082	0.0392269	6.59189e-06	14306	ebi-a-GCST90016941	rs62314653	C	A	0.0626	|| id:ebi-a-GCST90016941	TRUE	reported	igd	20.3789
	1	179720669	0.191613	0.0425039	7.6952e-06	14306	ebi-a-GCST90016941	rs74599091	A	G	0.0348	|| id:ebi-a-GCST90016941	TRUE	reported	igd	20.3232
	8	69010103	0.0792344	0.0170604	3.60761e-06	14306	ebi-a-GCST90016941	rs768253	G	T	0.6093	|| id:ebi-a-GCST90016941	TRUE	reported	igd	21.5699
	3	173151665	0.219178	0.0473566	5.9595e-06	14306	ebi-a-GCST90016941	rs77478751	G	A	0.9463	|| id:ebi-a-GCST90016941	TRUE	reported	igd	21.4207
	1	16773387	0.0758291	0.0170151	8.88567e-06	14306	ebi-a-GCST90016941	rs820999	G	T	0.5596	|| id:ebi-a-GCST90016941	TRUE	reported	igd	19.8611
	19	6928017	0.0999419	0.0201687	5.77192e-07	14306	ebi-a-GCST90016941	rs921925	A	C	0.2624	|| id:ebi-a-GCST90016941	TRUE	reported	igd	24.555
	6	67559323	0.124042	0.0278946	9.44583e-06	14306	ebi-a-GCST90016941	rs9345899	G	A	0.8688	|| id:ebi-a-GCST90016941	TRUE	reported	igd	19.7741
	chr.exposure	pos.exposure	beta.exposure	se.exposure	pval.exposure	samplesize.exposure	id.exposure	SNP	effect_allele.exposure	other_allele.exposure	eaf.exposure	exposure	mr_keep.exposure	pval_origin.exposure	data_source.exposure	F Value
	2	125440268	0.121754	0.0235357	3.01432e-07	14306	ebi-a-GCST90016942	rs10202904	G	T	0.5328	|| id:ebi-a-GCST90016942	TRUE	reported	igd	26.7616
	19	46439321	0.111274	0.0247517	9.27897e-06	14306	ebi-a-GCST90016942	rs10424197	A	G	0.675	|| id:ebi-a-GCST90016942	TRUE	reported	igd	20.2105
	11	89349287	0.111465	0.0250516	6.51869e-06	14306	ebi-a-GCST90016942	rs11018665	A	T	0.341	|| id:ebi-a-GCST90016942	TRUE	reported	igd	19.7973
	12	43701132	0.216781	0.0493496	6.07561e-06	14306	ebi-a-GCST90016942	rs12825290	G	C	0.9394	|| id:ebi-a-GCST90016942	TRUE	reported	igd	19.2963
	3	2086167	0.164498	0.0364959	7.44338e-06	14306	ebi-a-GCST90016942	rs4257531	G	A	0.1143	|| id:ebi-a-GCST90016942	TRUE	reported	igd	20.3158
	5	178160975	0.178661	0.039298	6.17988e-06	14306	ebi-a-GCST90016942	rs56131665	G	A	0.0934	|| id:ebi-a-GCST90016942	TRUE	reported	igd	20.669
family Methanobacteriaceae id.121	19	28827760	0.153519	0.0344519	8.22527e-06	14306	ebi-a-GCST90016942	rs6508769	T	C	0.165	|| id:ebi-a-GCST90016942	TRUE	reported	igd	19.8563
	3	15053083	0.199566	0.0411825	1.63061e-06	14306	ebi-a-GCST90016942	rs6776814	C	T	0.9105	|| id:ebi-a-GCST90016942	TRUE	reported	igd	23.4827
	7	10773932	0.15814	0.0351803	8.44578e-06	14306	ebi-a-GCST90016942	rs73068003	T	G	0.8777	|| id:ebi-a-GCST90016942	TRUE	reported	igd	20.2062
	13	41956181	0.21534	0.0436695	1.40854e-06	14306	ebi-a-GCST90016942	rs73457410	A	G	0.0666	|| id:ebi-a-GCST90016942	TRUE	reported	igd	24.316
	12	21338861	0.227245	0.048763	5.92107e-06	14306	ebi-a-GCST90016942	rs75208022	T	C	0.9235	|| id:ebi-a-GCST90016942	TRUE	reported	igd	21.7174
	4	104418307	0.216999	0.0449076	1.87556e-06	14306	ebi-a-GCST90016942	rs894996	C	A	0.0716	|| id:ebi-a-GCST90016942	TRUE	reported	igd	23.3494
	chr.exposure	pos.exposure	beta.exposure	se.exposure	pval.exposure	samplesize.exposure	id.exposure	SNP	effect_allele.exposure	other_allele.exposure	eaf.exposure	exposure	mr_keep.exposure	pval_origin.exposure	data_source.exposure	F Value
	15	93941937	0.204031	0.0445746	4.56321e-06	14306	ebi-a-GCST90016943	rs111966731	T	C	0.0716	|| id:ebi-a-GCST90016943	TRUE	reported	igd	20.9516
	11	610277	0.13607	0.0291797	4.50837e-06	14306	ebi-a-GCST90016943	rs11246212	T	C	0.1252	|| id:ebi-a-GCST90016943	TRUE	reported	igd	21.7452
	9	19682558	0.196145	0.044523	5.53197e-06	14306	ebi-a-GCST90016943	rs12002250	A	C	0.0596	|| id:ebi-a-GCST90016943	TRUE	reported	igd	19.4082
	4	84254259	0.16332	0.0360823	8.04841e-06	14306	ebi-a-GCST90016943	rs12509763	G	C	0.8837	|| id:ebi-a-GCST90016943	TRUE	reported	igd	20.4876
	6	38550301	0.140043	0.0281704	7.45178e-07	14306	ebi-a-GCST90016943	rs1569853	C	T	0.8618	|| id:ebi-a-GCST90016943	TRUE	reported	igd	24.7136
	16	5984558	0.189444	0.0430248	8.09003e-06	14306	ebi-a-GCST90016943	rs17138946	T	G	0.9533	|| id:ebi-a-GCST90016943	TRUE	reported	igd	19.3876
family Oxalobacteraceae id.2966	4	189935314	0.181604	0.0398742	6.25792e-06	14306	ebi-a-GCST90016943	rs36057338	G	T	0.0755	|| id:ebi-a-GCST90016943	TRUE	reported	igd	20.7428
	3	171947435	0.12561	0.0230053	4.87933e-08	14306	ebi-a-GCST90016943	rs4428215	G	A	0.2604	|| id:ebi-a-GCST90016943	TRUE	reported	igd	29.8121
	12	18793583	0.105525	0.0236769	7.19383e-06	14306	ebi-a-GCST90016943	rs561239	A	G	0.2823	|| id:ebi-a-GCST90016943	TRUE	reported	igd	19.8637
	22	37421469	0.118383	0.0241355	7.3872e-07	14306	ebi-a-GCST90016943	rs6000536	T	C	0.7893	|| id:ebi-a-GCST90016943	TRUE	reported	igd	24.0584
	7	1794263	0.181521	0.0400608	7.4583e-06	14306	ebi-a-GCST90016943	rs62435498	C	A	0.0646	|| id:ebi-a-GCST90016943	TRUE	reported	igd	20.5312
	9	87514407	0.105642	0.0200648	1.49417e-07	14306	ebi-a-GCST90016943	rs736744	C	T	0.4155	|| id:ebi-a-GCST90016943	TRUE	reported	igd	27.7207
	13	23443627	0.0921059	0.0201114	5.03733e-06	14306	ebi-a-GCST90016943	rs7993559	C	A	0.4622	|| id:ebi-a-GCST90016943	TRUE	reported	igd	20.9744
	4	67427392	0.18756	0.0423688	6.64003e-06	14306	ebi-a-GCST90016943	rs80330081	C	A	0.9344	|| id:ebi-a-GCST90016943	TRUE	reported	igd	19.5969
	2	16056779	0.109751	0.0238636	4.21143e-06	14306	ebi-a-GCST90016943	rs934049	G	A	0.2276	|| id:ebi-a-GCST90016943	TRUE	reported	igd	21.1517
	chr.exposure	pos.exposure	beta.exposure	se.exposure	pval.exposure	samplesize.exposure	id.exposure	SNP	effect_allele.exposure	other_allele.exposure	eaf.exposure	exposure	mr_keep.exposure	pval_origin.exposure	data_source.exposure	F Value
	11	9951672	0.0717634	0.0149229	1.43843e-06	14306	ebi-a-GCST90016944	rs10840326	G	C	0.5567	|| id:ebi-a-GCST90016944	TRUE	reported	igd	23.1259
	9	22718481	0.119902	0.0258219	4.29151e-06	14306	ebi-a-GCST90016944	rs10965428	A	C	0.9205	|| id:ebi-a-GCST90016944	TRUE	reported	igd	21.5614
	16	48742489	0.113957	0.0256403	7.06627e-06	14306	ebi-a-GCST90016944	rs111582866	A	G	0.8986	|| id:ebi-a-GCST90016944	TRUE	reported	igd	19.7531
	15	73477482	0.0670948	0.015239	9.18523e-06	14306	ebi-a-GCST90016944	rs12050685	G	A	0.6402	|| id:ebi-a-GCST90016944	TRUE	reported	igd	19.385
family Pasteurellaceae id.3689	6	129224488	0.102214	0.0197189	3.04902e-07	14306	ebi-a-GCST90016944	rs12191680	C	G	0.165	|| id:ebi-a-GCST90016944	TRUE	reported	igd	26.8692
	17	32862601	0.187381	0.0429572	7.31526e-06	14306	ebi-a-GCST90016944	rs16970009	A	G	0.0437	|| id:ebi-a-GCST90016944	TRUE	reported	igd	19.0274
	12	115491973	0.122729	0.0264958	4.01578e-06	14306	ebi-a-GCST90016944	rs35510	A	G	0.0785	|| id:ebi-a-GCST90016944	TRUE	reported	igd	21.4556
	22	26891808	0.0685479	0.0149032	4.71846e-06	14306	ebi-a-GCST90016944	rs4822728	T	C	0.4374	|| id:ebi-a-GCST90016944	TRUE	reported	igd	21.1558
	20	57274077	0.0684647	0.014674	3.44057e-06	14306	ebi-a-GCST90016944	rs6092684	A	T	0.4235	|| id:ebi-a-GCST90016944	TRUE	reported	igd	21.7689
	9	6818307	0.118018	0.0259206	7.2267e-06	14306	ebi-a-GCST90016944	rs62568866	A	T	0.9006	|| id:ebi-a-GCST90016944	TRUE	reported	igd	20.7303
	7	116918060	0.0781862	0.0175366	7.74819e-06	14306	ebi-a-GCST90016944	rs6972479	G	A	0.7575	|| id:ebi-a-GCST90016944	TRUE	reported	igd	19.8779
	5	26531908	0.13988	0.0303029	3.3522e-06	14306	ebi-a-GCST90016944	rs72756943	G	A	0.0855	|| id:ebi-a-GCST90016944	TRUE	reported	igd	21.308
	3	97972214	0.222573	0.0484634	8.71325e-06	14306	ebi-a-GCST90016944	rs73139353	C	A	0.9354	|| id:ebi-a-GCST90016944	TRUE	reported	igd	21.092
	20	5412480	0.0986502	0.0216316	9.46303e-06	14306	ebi-a-GCST90016944	rs731534	G	C	0.8638	|| id:ebi-a-GCST90016944	TRUE	reported	igd	20.7979
	10	94306385	0.24289	0.0500406	1.82856e-06	14306	ebi-a-GCST90016944	rs76022354	C	T	0.0328	|| id:ebi-a-GCST90016944	TRUE	reported	igd	23.5599
	9	105650242	0.241159	0.0498372	2.04894e-06	14306	ebi-a-GCST90016944	rs78909003	C	T	0.9503	|| id:ebi-a-GCST90016944	TRUE	reported	igd	23.4153
	6	55448491	0.0881865	0.0169965	2.476e-07	14306	ebi-a-GCST90016944	rs9382510	T	C	0.7545	|| id:ebi-a-GCST90016944	TRUE	reported	igd	26.9206
	17	64535013	0.176406	0.041017	9.0826e-06	14306	ebi-a-GCST90016944	rs9895850	C	T	0.9503	|| id:ebi-a-GCST90016944	TRUE	reported	igd	18.4969
	16	84977389	0.0710386	0.0158024	8.22602e-06	14306	ebi-a-GCST90016944	rs9938097	C	T	0.6332	|| id:ebi-a-GCST90016944	TRUE	reported	igd	20.2089
	chr.exposure	pos.exposure	beta.exposure	se.exposure	pval.exposure	samplesize.exposure	id.exposure	SNP	effect_allele.exposure	other_allele.exposure	eaf.exposure	exposure	mr_keep.exposure	pval_origin.exposure	data_source.exposure	F Value
	9	9423378	0.257982	0.0549569	3.15297e-06	14306	ebi-a-GCST90016945	rs117452796	G	A	0.9324	|| id:ebi-a-GCST90016945	TRUE	reported	igd	22.0361
	9	15134457	0.128888	0.0288764	8.28972e-06	14306	ebi-a-GCST90016945	rs11787651	A	G	0.0537	|| id:ebi-a-GCST90016945	TRUE	reported	igd	19.9223
	1	27418225	0.064399	0.0141246	5.82237e-06	14306	ebi-a-GCST90016945	rs12144792	C	T	0.3588	|| id:ebi-a-GCST90016945	TRUE	reported	igd	20.7877
	3	182984048	0.0739885	0.0150931	1.01109e-06	14306	ebi-a-GCST90016945	rs12634826	G	T	0.7048	|| id:ebi-a-GCST90016945	TRUE	reported	igd	24.031
family Peptococcaceae id.2024	2	188895743	0.0684213	0.0141137	1.46157e-06	14306	ebi-a-GCST90016945	rs12992764	T	G	0.4026	|| id:ebi-a-GCST90016945	TRUE	reported	igd	23.5018
	10	129175962	0.135774	0.0289757	2.31308e-06	14306	ebi-a-GCST90016945	rs150600492	A	C	0.0626	|| id:ebi-a-GCST90016945	TRUE	reported	igd	21.9566
	8	28614217	0.0812655	0.0164355	4.94778e-07	14306	ebi-a-GCST90016945	rs35703006	G	T	0.2157	|| id:ebi-a-GCST90016945	TRUE	reported	igd	24.4482
	8	3580757	0.0910387	0.0185869	1.74193e-06	14306	ebi-a-GCST90016945	rs4990837	A	G	0.174	|| id:ebi-a-GCST90016945	TRUE	reported	igd	23.9904
	5	89252884	0.147941	0.0317498	3.40847e-06	14306	ebi-a-GCST90016945	rs75430375	T	C	0.9354	|| id:ebi-a-GCST90016945	TRUE	reported	igd	21.7118
	13	113561082	0.0821779	0.0173541	2.02209e-06	14306	ebi-a-GCST90016945	rs75898026	G	A	0.8171	|| id:ebi-a-GCST90016945	TRUE	reported	igd	22.4236
	chr.exposure	pos.exposure	beta.exposure	se.exposure	pval.exposure	samplesize.exposure	id.exposure	SNP	effect_allele.exposure	other_allele.exposure	eaf.exposure	exposure	mr_keep.exposure	pval_origin.exposure	data_source.exposure	F Value
	14	78643095	0.0701212	0.0158326	8.60815e-06	14306	ebi-a-GCST90016948	rs10131942	C	G	0.164	|| id:ebi-a-GCST90016948	TRUE	reported	igd	19.6153
	1	99470269	0.0589878	0.0132268	8.9747e-06	14306	ebi-a-GCST90016948	rs12057990	C	T	0.2406	|| id:ebi-a-GCST90016948	TRUE	reported	igd	19.8891
	1	210681370	0.0751986	0.0147265	5.5423e-07	14306	ebi-a-GCST90016948	rs12118202	C	T	0.8101	|| id:ebi-a-GCST90016948	TRUE	reported	igd	26.0748
	3	71801830	0.0539768	0.0119687	7.39486e-06	14306	ebi-a-GCST90016948	rs13069367	C	A	0.6451	|| id:ebi-a-GCST90016948	TRUE	reported	igd	20.3386
	3	170126707	0.084515	0.0179163	2.08027e-06	14306	ebi-a-GCST90016948	rs148376875	T	G	0.1203	|| id:ebi-a-GCST90016948	TRUE	reported	igd	22.2521
	20	9771109	0.0569105	0.0117486	1.30377e-06	14306	ebi-a-GCST90016948	rs2206482	G	T	0.5577	|| id:ebi-a-GCST90016948	TRUE	reported	igd	23.4646
	3	32408916	0.0554249	0.0123265	8.43587e-06	14306	ebi-a-GCST90016948	rs2278540	G	A	0.326	|| id:ebi-a-GCST90016948	TRUE	reported	igd	20.2176
	11	119712522	0.1567	0.0347882	5.60144e-06	14306	ebi-a-GCST90016948	rs34071565	A	T	0.9324	|| id:ebi-a-GCST90016948	TRUE	reported	igd	20.2896
	5	180283881	0.0805894	0.0178291	7.40321e-06	14306	ebi-a-GCST90016948	rs34660375	G	A	0.8091	|| id:ebi-a-GCST90016948	TRUE	reported	igd	20.4313
family Prevotellaceae id.960	8	23714609	0.0564199	0.0124655	8.60578e-06	14306	ebi-a-GCST90016948	rs3758087	T	C	0.2922	|| id:ebi-a-GCST90016948	TRUE	reported	igd	20.4854
	1	111161677	0.083936	0.0167936	5.4968e-07	14306	ebi-a-GCST90016948	rs3860225	A	G	0.1382	|| id:ebi-a-GCST90016948	TRUE	reported	igd	24.9809
	2	118910912	0.0604992	0.0118027	3.02315e-07	14306	ebi-a-GCST90016948	rs4493272	C	T	0.5288	|| id:ebi-a-GCST90016948	TRUE	reported	igd	26.2746
	3	4864877	0.0679529	0.0145407	2.77192e-06	14306	ebi-a-GCST90016948	rs4685827	C	T	0.7763	|| id:ebi-a-GCST90016948	TRUE	reported	igd	21.8396
	19	17460999	0.0740876	0.0161926	5.56583e-06	14306	ebi-a-GCST90016948	rs7252711	G	A	0.8728	|| id:ebi-a-GCST90016948	TRUE	reported	igd	20.9343
	12	21404832	0.0601448	0.0135454	7.59451e-06	14306	ebi-a-GCST90016948	rs7975087	A	C	0.7714	|| id:ebi-a-GCST90016948	TRUE	reported	igd	19.7157
	14	33706908	0.229046	0.0483124	9.29929e-07	14306	ebi-a-GCST90016948	rs912860	A	G	0.9732	|| id:ebi-a-GCST90016948	TRUE	reported	igd	22.4765
	13	105075823	0.0592681	0.0127329	2.58988e-06	14306	ebi-a-GCST90016948	rs9586501	G	A	0.3141	|| id:ebi-a-GCST90016948	TRUE	reported	igd	21.6664
	18	63018983	0.0914807	0.0173611	1.06324e-07	14306	ebi-a-GCST90016948	rs9958960	A	G	0.835	|| id:ebi-a-GCST90016948	TRUE	reported	igd	27.7654
	chr.exposure	pos.exposure	beta.exposure	se.exposure	pval.exposure	samplesize.exposure	id.exposure	SNP	effect_allele.exposure	other_allele.exposure	eaf.exposure	exposure	mr_keep.exposure	pval_origin.exposure	data_source.exposure	F Value
	5	119372737	0.11354	0.0250863	5.84454e-06	14306	ebi-a-GCST90016949	rs1035406	A	G	0.9006	|| id:ebi-a-GCST90016949	TRUE	reported	igd	20.4845
	10	113419797	0.0743184	0.0158724	2.67147e-06	14306	ebi-a-GCST90016949	rs11591293	G	T	0.4195	|| id:ebi-a-GCST90016949	TRUE	reported	igd	21.9234
	19	28641647	0.0730952	0.0163491	7.62588e-06	14306	ebi-a-GCST90016949	rs12977163	G	C	0.3678	|| id:ebi-a-GCST90016949	TRUE	reported	igd	19.989
	16	88554243	0.0701719	0.0158061	9.17339e-06	14306	ebi-a-GCST90016949	rs13336560	T	C	0.5437	|| id:ebi-a-GCST90016949	TRUE	reported	igd	19.7096
	5	27945645	0.0999312	0.0218634	4.70392e-06	14306	ebi-a-GCST90016949	rs1549633	A	C	0.1561	|| id:ebi-a-GCST90016949	TRUE	reported	igd	20.8914
family Rhodospirillaceae id.2717	6	89268715	0.0999238	0.0227326	9.63696e-06	14306	ebi-a-GCST90016949	rs1923415	G	A	0.8628	|| id:ebi-a-GCST90016949	TRUE	reported	igd	19.3214
	2	225633812	0.0971389	0.0200064	1.71479e-06	14306	ebi-a-GCST90016949	rs3754624	C	T	0.162	|| id:ebi-a-GCST90016949	TRUE	reported	igd	23.5748
	10	2670553	0.107529	0.0235725	3.12018e-06	14306	ebi-a-GCST90016949	rs4278423	T	C	0.1064	|| id:ebi-a-GCST90016949	TRUE	reported	igd	20.8085
	22	27173098	0.0734321	0.0160521	7.00519e-06	14306	ebi-a-GCST90016949	rs4822789	G	C	0.3926	|| id:ebi-a-GCST90016949	TRUE	reported	igd	20.9271
	3	84471266	0.0911851	0.0196395	2.86682e-06	14306	ebi-a-GCST90016949	rs55876211	T	C	0.828	|| id:ebi-a-GCST90016949	TRUE	reported	igd	21.5569
	12	73139398	0.164808	0.0360647	7.22587e-06	14306	ebi-a-GCST90016949	rs61933850	G	A	0.0905	|| id:ebi-a-GCST90016949	TRUE	reported	igd	20.883
	1	78619512	0.111984	0.0251088	9.94672e-06	14306	ebi-a-GCST90016949	rs6679026	T	C	0.1074	|| id:ebi-a-GCST90016949	TRUE	reported	igd	19.8912
	8	131958403	0.117366	0.0261324	5.34749e-06	14306	ebi-a-GCST90016949	rs7001029	C	T	0.0934	|| id:ebi-a-GCST90016949	TRUE	reported	igd	20.1709
	1	92206218	0.0816858	0.0180791	7.3492e-06	14306	ebi-a-GCST90016949	rs72714493	A	G	0.2157	|| id:ebi-a-GCST90016949	TRUE	reported	igd	20.4145
	4	134192918	0.0911896	0.0204907	6.67298e-06	14306	ebi-a-GCST90016949	rs74354280	T	C	0.8469	|| id:ebi-a-GCST90016949	TRUE	reported	igd	19.8051
	2	169033340	0.136049	0.0285767	1.48988e-06	14306	ebi-a-GCST90016949	rs76784716	A	G	0.0716	|| id:ebi-a-GCST90016949	TRUE	reported	igd	22.6656
	3	13726736	0.0842444	0.0163583	2.53122e-07	14306	ebi-a-GCST90016949	rs9813022	G	A	0.6978	|| id:ebi-a-GCST90016949	TRUE	reported	igd	26.522
	chr.exposure	pos.exposure	beta.exposure	se.exposure	pval.exposure	samplesize.exposure	id.exposure	SNP	effect_allele.exposure	other_allele.exposure	eaf.exposure	exposure	mr_keep.exposure	pval_origin.exposure	data_source.exposure	F Value
	9	86052655	0.0883756	0.0197506	6.50759e-06	14306	ebi-a-GCST90016950	rs10217435	T	C	0.9125	|| id:ebi-a-GCST90016950	TRUE	reported	igd	20.0218
	11	17589129	0.0534763	0.0122666	7.50412e-06	14306	ebi-a-GCST90016950	rs10832801	C	A	0.7326	|| id:ebi-a-GCST90016950	TRUE	reported	igd	19.0053
	11	95304834	0.105589	0.0206213	5.64378e-07	14306	ebi-a-GCST90016950	rs1939881	A	G	0.9423	|| id:ebi-a-GCST90016950	TRUE	reported	igd	26.2183
	8	99188924	0.0549203	0.0121904	6.08611e-06	14306	ebi-a-GCST90016950	rs2447496	A	G	0.7167	|| id:ebi-a-GCST90016950	TRUE	reported	igd	20.2969
	21	32496710	0.0711137	0.0156966	4.31102e-06	14306	ebi-a-GCST90016950	rs2833282	G	A	0.1282	|| id:ebi-a-GCST90016950	TRUE	reported	igd	20.5256
	8	144441740	0.0850181	0.0191539	7.09823e-06	14306	ebi-a-GCST90016950	rs35909684	C	A	0.9225	|| id:ebi-a-GCST90016950	TRUE	reported	igd	19.7019
family Rikenellaceae id.967	21	28515912	0.0656005	0.0144903	7.19515e-06	14306	ebi-a-GCST90016950	rs36021379	G	A	0.8658	|| id:ebi-a-GCST90016950	TRUE	reported	igd	20.4955
	15	71658642	0.0526393	0.0108555	1.34831e-06	14306	ebi-a-GCST90016950	rs4264350	C	T	0.6064	|| id:ebi-a-GCST90016950	TRUE	reported	igd	23.5137
	16	85396629	0.0481514	0.0110006	7.06415e-06	14306	ebi-a-GCST90016950	rs4783173	C	G	0.4483	|| id:ebi-a-GCST90016950	TRUE	reported	igd	19.1595
	18	4069710	0.0570915	0.0125048	6.12238e-06	14306	ebi-a-GCST90016950	rs59663348	G	A	0.1948	|| id:ebi-a-GCST90016950	TRUE	reported	igd	20.8444
	9	14158854	0.0504257	0.0107399	2.76427e-06	14306	ebi-a-GCST90016950	rs62532512	A	C	0.5169	|| id:ebi-a-GCST90016950	TRUE	reported	igd	22.0447
	7	135778919	0.0635814	0.0137451	3.63471e-06	14306	ebi-a-GCST90016950	rs67281112	G	C	0.2167	|| id:ebi-a-GCST90016950	TRUE	reported	igd	21.3976
	2	174257127	0.0696747	0.0157103	9.31515e-06	14306	ebi-a-GCST90016950	rs6744030	C	T	0.1382	|| id:ebi-a-GCST90016950	TRUE	reported	igd	19.669
	1	19790706	0.0549688	0.0110534	6.57552e-07	14306	ebi-a-GCST90016950	rs67705352	G	T	0.6262	|| id:ebi-a-GCST90016950	TRUE	reported	igd	24.7309
	4	187842232	0.0570355	0.011887	1.447e-06	14306	ebi-a-GCST90016950	rs6837275	A	G	0.2535	|| id:ebi-a-GCST90016950	TRUE	reported	igd	23.0222
	18	10338470	0.0618674	0.0134882	5.80711e-06	14306	ebi-a-GCST90016950	rs7242694	T	C	0.8191	|| id:ebi-a-GCST90016950	TRUE	reported	igd	21.0385
	14	90270821	0.137747	0.0295688	3.61377e-06	14306	ebi-a-GCST90016950	rs74474130	T	G	0.0656	|| id:ebi-a-GCST90016950	TRUE	reported	igd	21.7019
	14	21548634	0.156209	0.0336482	2.84695e-06	14306	ebi-a-GCST90016950	rs77885767	T	C	0.9523	|| id:ebi-a-GCST90016950	TRUE	reported	igd	21.552
	8	134444155	0.0724262	0.016063	8.70923e-06	14306	ebi-a-GCST90016950	rs7832304	G	T	0.8539	|| id:ebi-a-GCST90016950	TRUE	reported	igd	20.33
	21	40580258	0.048924	0.0106843	4.72748e-06	14306	ebi-a-GCST90016950	rs8130320	G	A	0.5179	|| id:ebi-a-GCST90016950	TRUE	reported	igd	20.9677
	6	100244667	0.0636841	0.0143416	8.79063e-06	14306	ebi-a-GCST90016950	rs9389714	T	C	0.8211	|| id:ebi-a-GCST90016950	TRUE	reported	igd	19.7182
	13	22867356	0.141478	0.0315848	3.99448e-06	14306	ebi-a-GCST90016950	rs9578457	A	G	0.9433	|| id:ebi-a-GCST90016950	TRUE	reported	igd	20.0642
	13	38044689	0.0821173	0.0159596	1.91801e-07	14306	ebi-a-GCST90016950	rs9603208	G	T	0.1034	|| id:ebi-a-GCST90016950	TRUE	reported	igd	26.4744
	chr.exposure	pos.exposure	beta.exposure	se.exposure	pval.exposure	samplesize.exposure	id.exposure	SNP	effect_allele.exposure	other_allele.exposure	eaf.exposure	exposure	mr_keep.exposure	pval_origin.exposure	data_source.exposure	F Value
	8	69732887	0.0534595	0.011677	5.35229e-06	14306	ebi-a-GCST90016951	rs10093275	C	T	0.2823	|| id:ebi-a-GCST90016951	TRUE	reported	igd	20.9598
	2	29829167	0.053336	0.0120209	8.52158e-06	14306	ebi-a-GCST90016951	rs10166469	C	T	0.7237	|| id:ebi-a-GCST90016951	TRUE	reported	igd	19.6864
	8	4555684	0.0490539	0.0109865	8.60855e-06	14306	ebi-a-GCST90016951	rs1158100	G	A	0.6451	|| id:ebi-a-GCST90016951	TRUE	reported	igd	19.9356
	1	107661606	0.108708	0.0238006	4.22435e-06	14306	ebi-a-GCST90016951	rs1612733	T	C	0.0596	|| id:ebi-a-GCST90016951	TRUE	reported	igd	20.8616
family Ruminococcaceae id.2050	1	61425267	0.0848534	0.0172114	7.29625e-07	14306	ebi-a-GCST90016951	rs17376049	T	C	0.1083	|| id:ebi-a-GCST90016951	TRUE	reported	igd	24.3056
	2	218216801	0.169146	0.0355009	1.14464e-06	14306	ebi-a-GCST90016951	rs2113833	T	C	0.0417	|| id:ebi-a-GCST90016951	TRUE	reported	igd	22.701
	20	58278102	0.0480152	0.0106011	6.04463e-06	14306	ebi-a-GCST90016951	rs2426816	A	T	0.503	|| id:ebi-a-GCST90016951	TRUE	reported	igd	20.5142
	1	147744468	0.0927607	0.0210123	8.6902e-06	14306	ebi-a-GCST90016951	rs3009418	C	A	0.0785	|| id:ebi-a-GCST90016951	TRUE	reported	igd	19.4886
	11	116485496	0.0706431	0.016046	9.29351e-06	14306	ebi-a-GCST90016951	rs499272	G	C	0.1362	|| id:ebi-a-GCST90016951	TRUE	reported	igd	19.3823
	12	47384118	0.13822	0.0266152	1.44338e-07	14306	ebi-a-GCST90016951	rs55793120	T	C	0.0507	|| id:ebi-a-GCST90016951	TRUE	reported	igd	26.9701
	9	2801371	0.199327	0.0410444	1.66414e-06	14306	ebi-a-GCST90016951	rs56199908	C	T	0.9463	|| id:ebi-a-GCST90016951	TRUE	reported	igd	23.5844
	1	24473669	0.0901053	0.0203104	9.60484e-06	14306	ebi-a-GCST90016951	rs76724913	T	G	0.0765	|| id:ebi-a-GCST90016951	TRUE	reported	igd	19.6818
	chr.exposure	pos.exposure	beta.exposure	se.exposure	pval.exposure	samplesize.exposure	id.exposure	SNP	effect_allele.exposure	other_allele.exposure	eaf.exposure	exposure	mr_keep.exposure	pval_origin.exposure	data_source.exposure	F Value
	4	53657577	0.0934027	0.0190343	3.72495e-06	14306	ebi-a-GCST90016952	rs10028567	T	C	0.9185	|| id:ebi-a-GCST90016952	TRUE	reported	igd	24.0794
	12	100584014	0.130554	0.0225943	1.40136e-08	14306	ebi-a-GCST90016952	rs11110281	C	T	0.9324	|| id:ebi-a-GCST90016952	TRUE	reported	igd	33.3874
	12	120729505	0.107008	0.0236973	5.33814e-06	14306	ebi-a-GCST90016952	rs16950051	A	G	0.0586	|| id:ebi-a-GCST90016952	TRUE	reported	igd	20.3908
	14	97526750	0.0842751	0.0184509	4.25667e-06	14306	ebi-a-GCST90016952	rs2370083	T	G	0.9115	|| id:ebi-a-GCST90016952	TRUE	reported	igd	20.8624
	8	15312558	0.109069	0.0246868	9.41044e-06	14306	ebi-a-GCST90016952	rs28718126	A	G	0.0656	|| id:ebi-a-GCST90016952	TRUE	reported	igd	19.5197
	8	10143164	0.0639298	0.0126525	3.72237e-07	14306	ebi-a-GCST90016952	rs2952251	G	A	0.7475	|| id:ebi-a-GCST90016952	TRUE	reported	igd	25.5302
	16	991253	0.0609349	0.0129703	2.63846e-06	14306	ebi-a-GCST90016952	rs35344081	G	A	0.2406	|| id:ebi-a-GCST90016952	TRUE	reported	igd	22.0715
	5	169689604	0.0826855	0.0172536	1.32559e-06	14306	ebi-a-GCST90016952	rs395407	C	G	0.8579	|| id:ebi-a-GCST90016952	TRUE	reported	igd	22.9667
family Streptococcaceae id.1850	17	61298020	0.0544035	0.0111271	8.91887e-07	14306	ebi-a-GCST90016952	rs4968759	G	A	0.5736	|| id:ebi-a-GCST90016952	TRUE	reported	igd	23.9051
	4	37452858	0.088021	0.019876	7.88352e-06	14306	ebi-a-GCST90016952	rs57646748	A	G	0.9324	|| id:ebi-a-GCST90016952	TRUE	reported	igd	19.6117
	16	73391982	0.0801931	0.0178576	8.70583e-06	14306	ebi-a-GCST90016952	rs6563952	G	C	0.0924	|| id:ebi-a-GCST90016952	TRUE	reported	igd	20.1664
	3	132058723	0.0619209	0.0135744	6.93793e-06	14306	ebi-a-GCST90016952	rs6806351	C	T	0.7913	|| id:ebi-a-GCST90016952	TRUE	reported	igd	20.8081
	15	41663393	0.0927983	0.0192021	1.82163e-06	14306	ebi-a-GCST90016952	rs72739637	A	G	0.1064	|| id:ebi-a-GCST90016952	TRUE	reported	igd	23.3551
	3	94153993	0.150606	0.0334079	3.08937e-06	14306	ebi-a-GCST90016952	rs76717940	T	A	0.0606	|| id:ebi-a-GCST90016952	TRUE	reported	igd	20.3229
	5	174173171	0.104239	0.022806	3.72195e-06	14306	ebi-a-GCST90016952	rs77558518	G	A	0.9354	|| id:ebi-a-GCST90016952	TRUE	reported	igd	20.8911
	1	240441766	0.0993013	0.0224788	7.93341e-06	14306	ebi-a-GCST90016952	rs77968078	A	G	0.9433	|| id:ebi-a-GCST90016952	TRUE	reported	igd	19.5148
	10	28588269	0.0959639	0.021545	6.32732e-06	14306	ebi-a-GCST90016952	rs7916711	A	G	0.0646	|| id:ebi-a-GCST90016952	TRUE	reported	igd	19.8391
	7	46778653	0.0642449	0.0142702	7.41515e-06	14306	ebi-a-GCST90016952	rs957755	G	T	0.8091	|| id:ebi-a-GCST90016952	TRUE	reported	igd	20.2683
	17	80576624	0.0693015	0.0154096	4.91802e-06	14306	ebi-a-GCST90016952	rs9903102	A	C	0.836	|| id:ebi-a-GCST90016952	TRUE	reported	igd	20.2257
	chr.exposure	pos.exposure	beta.exposure	se.exposure	pval.exposure	samplesize.exposure	id.exposure	SNP	effect_allele.exposure	other_allele.exposure	eaf.exposure	exposure	mr_keep.exposure	pval_origin.exposure	data_source.exposure	F Value
	14	102897930	0.0867108	0.0180573	1.72926e-06	14306	ebi-a-GCST90016956	rs111810795	T	C	0.8926	|| id:ebi-a-GCST90016956	TRUE	reported	igd	23.059
	13	61597625	0.253809	0.0539169	6.19028e-06	14306	ebi-a-GCST90016956	rs114889439	G	A	0.9473	|| id:ebi-a-GCST90016956	TRUE	reported	igd	22.1597
	21	35576123	0.0503337	0.0113763	9.2538e-06	14306	ebi-a-GCST90016956	rs11700976	C	A	0.4503	|| id:ebi-a-GCST90016956	TRUE	reported	igd	19.5756
	5	132646303	0.208096	0.0453999	4.52856e-06	14306	ebi-a-GCST90016956	rs12186441	G	A	0.0368	|| id:ebi-a-GCST90016956	TRUE	reported	igd	21.0096
	7	21637810	0.055301	0.0117654	2.57365e-06	14306	ebi-a-GCST90016956	rs12668619	A	G	0.3549	|| id:ebi-a-GCST90016956	TRUE	reported	igd	22.0929
	1	50088819	0.0621452	0.0119266	1.28493e-07	14306	ebi-a-GCST90016956	rs12741784	T	C	0.664	|| id:ebi-a-GCST90016956	TRUE	reported	igd	27.1508
	4	46366067	0.0514024	0.0112125	4.50671e-06	14306	ebi-a-GCST90016956	rs1442060	A	G	0.506	|| id:ebi-a-GCST90016956	TRUE	reported	igd	21.0166
	8	41231597	0.0520689	0.0115656	7.34903e-06	14306	ebi-a-GCST90016956	rs1447205	C	G	0.6382	|| id:ebi-a-GCST90016956	TRUE	reported	igd	20.2684
	18	30208691	0.0818934	0.018245	9.25273e-06	14306	ebi-a-GCST90016956	rs1693340	T	C	0.1262	|| id:ebi-a-GCST90016956	TRUE	reported	igd	20.147
family Veillonellaceae id.2172	4	23317124	0.0526752	0.0114886	4.63554e-06	14306	ebi-a-GCST90016956	rs2175069	G	A	0.6143	|| id:ebi-a-GCST90016956	TRUE	reported	igd	21.0222
	5	38348199	0.083617	0.0187159	7.88515e-06	14306	ebi-a-GCST90016956	rs2561116	G	T	0.8867	|| id:ebi-a-GCST90016956	TRUE	reported	igd	19.9603
	13	78785141	0.0904972	0.0200428	5.26926e-06	14306	ebi-a-GCST90016956	rs2585520	T	G	0.9175	|| id:ebi-a-GCST90016956	TRUE	reported	igd	20.387
	8	138319508	0.050942	0.0114921	7.45006e-06	14306	ebi-a-GCST90016956	rs4263802	G	A	0.3837	|| id:ebi-a-GCST90016956	TRUE	reported	igd	19.6496
	15	78546996	0.0554965	0.0119467	3.73474e-06	14306	ebi-a-GCST90016956	rs4461038	G	A	0.6938	|| id:ebi-a-GCST90016956	TRUE	reported	igd	21.5792
	18	462180	0.0587799	0.0128297	4.49345e-06	14306	ebi-a-GCST90016956	rs4797169	T	C	0.2505	|| id:ebi-a-GCST90016956	TRUE	reported	igd	20.9906
	6	139188534	0.202367	0.0464388	6.74544e-06	14306	ebi-a-GCST90016956	rs61264131	A	C	0.0497	|| id:ebi-a-GCST90016956	TRUE	reported	igd	18.9897
	1	244391618	0.0534397	0.0118254	8.67981e-06	14306	ebi-a-GCST90016956	rs6692542	A	G	0.3728	|| id:ebi-a-GCST90016956	TRUE	reported	igd	20.4219
	6	75534152	0.0638696	0.0141765	5.47621e-06	14306	ebi-a-GCST90016956	rs6909981	T	C	0.7982	|| id:ebi-a-GCST90016956	TRUE	reported	igd	20.2979
	13	101617913	0.0703773	0.0156855	7.19234e-06	14306	ebi-a-GCST90016956	rs75768969	G	C	0.839	|| id:ebi-a-GCST90016956	TRUE	reported	igd	20.1311
	13	38326692	0.100666	0.0207016	1.57688e-06	14306	ebi-a-GCST90016956	rs79535861	A	C	0.0885	|| id:ebi-a-GCST90016956	TRUE	reported	igd	23.646
	6	92380922	0.0509102	0.0113253	8.48887e-06	14306	ebi-a-GCST90016956	rs9345168	C	A	0.4662	|| id:ebi-a-GCST90016956	TRUE	reported	igd	20.2074
	chr.exposure	pos.exposure	beta.exposure	se.exposure	pval.exposure	samplesize.exposure	id.exposure	SNP	effect_allele.exposure	other_allele.exposure	eaf.exposure	exposure	mr_keep.exposure	pval_origin.exposure	data_source.exposure	F Value
	1	105422565	0.0655301	0.014223	4.13847e-06	14306	ebi-a-GCST90016957	rs11184341	G	C	0.2783	|| id:ebi-a-GCST90016957	TRUE	reported	igd	21.2275
	12	130309670	0.0907065	0.0196746	3.7313e-06	14306	ebi-a-GCST90016957	rs111862613	T	C	0.166	|| id:ebi-a-GCST90016957	TRUE	reported	igd	21.2552
	18	49473635	0.204683	0.0431572	2.91823e-06	14306	ebi-a-GCST90016957	rs117107102	A	G	0.0447	|| id:ebi-a-GCST90016957	TRUE	reported	igd	22.4935
	4	95027272	0.0749798	0.0150177	6.73085e-07	14306	ebi-a-GCST90016957	rs11729256	T	C	0.2386	|| id:ebi-a-GCST90016957	TRUE	reported	igd	24.9277
	15	97570657	0.0619104	0.0130946	2.15139e-06	14306	ebi-a-GCST90016957	rs12908520	G	A	0.4563	|| id:ebi-a-GCST90016957	TRUE	reported	igd	22.3534
	16	81063149	0.0745516	0.0156195	2.69942e-06	14306	ebi-a-GCST90016957	rs2602429	C	T	0.2217	|| id:ebi-a-GCST90016957	TRUE	reported	igd	22.7814
	10	11389614	0.064218	0.0140994	5.02528e-06	14306	ebi-a-GCST90016957	rs3995795	C	T	0.3181	|| id:ebi-a-GCST90016957	TRUE	reported	igd	20.7449
family Verrucomicrobiaceae id.4036	10	5064327	0.0687992	0.0147694	2.75442e-06	14306	ebi-a-GCST90016957	rs4242783	G	A	0.2873	|| id:ebi-a-GCST90016957	TRUE	reported	igd	21.6991
	11	130280667	0.0648691	0.0135928	1.1293e-06	14306	ebi-a-GCST90016957	rs4936098	A	G	0.34	|| id:ebi-a-GCST90016957	TRUE	reported	igd	22.775
	1	41074472	0.0758811	0.0167762	6.63025e-06	14306	ebi-a-GCST90016957	rs61779207	A	G	0.8221	|| id:ebi-a-GCST90016957	TRUE	reported	igd	20.4588
	4	100544188	0.112124	0.0236422	1.64611e-06	14306	ebi-a-GCST90016957	rs74542928	T	C	0.0785	|| id:ebi-a-GCST90016957	TRUE	reported	igd	22.4917
	6	56341481	0.0704354	0.0147128	2.51287e-06	14306	ebi-a-GCST90016957	rs9349825	G	A	0.7207	|| id:ebi-a-GCST90016957	TRUE	reported	igd	22.9188
	20	31867840	0.0631526	0.0143767	9.5812e-06	14306	ebi-a-GCST90016957	rs941682	A	G	0.6889	|| id:ebi-a-GCST90016957	TRUE	reported	igd	19.2959
	chr.exposure	pos.exposure	beta.exposure	se.exposure	pval.exposure	samplesize.exposure	id.exposure	SNP	effect_allele.exposure	other_allele.exposure	eaf.exposure	exposure	mr_keep.exposure	pval_origin.exposure	data_source.exposure	F Value
	19	711637	0.160034	0.0349472	4.08037e-06	14306	ebi-a-GCST90016958	rs11671100	C	A	0.7992	|| id:ebi-a-GCST90016958	TRUE	reported	igd	20.9701
	7	146808977	0.127099	0.025656	7.4929e-07	14306	ebi-a-GCST90016958	rs11764871	G	T	0.2505	|| id:ebi-a-GCST90016958	TRUE	reported	igd	24.5418
	5	94692439	0.126643	0.0257111	1.02501e-06	14306	ebi-a-GCST90016958	rs2546105	A	T	0.2455	|| id:ebi-a-GCST90016958	TRUE	reported	igd	24.2617
	7	57589803	0.124197	0.0257026	1.56603e-06	14306	ebi-a-GCST90016958	rs2944282	C	T	0.6998	|| id:ebi-a-GCST90016958	TRUE	reported	igd	23.349
	12	131103256	0.186945	0.0418412	6.24827e-06	14306	ebi-a-GCST90016958	rs34962571	C	A	0.9175	|| id:ebi-a-GCST90016958	TRUE	reported	igd	19.9627
family Victivallaceae id.2255	11	9316730	0.152918	0.0288525	1.53784e-07	14306	ebi-a-GCST90016958	rs4396289	T	C	0.84	|| id:ebi-a-GCST90016958	TRUE	reported	igd	28.0899
	2	31211657	0.145501	0.0300007	3.07921e-06	14306	ebi-a-GCST90016958	rs61702987	T	C	0.175	|| id:ebi-a-GCST90016958	TRUE	reported	igd	23.5217
	9	111086170	0.246101	0.0483077	2.69855e-07	14306	ebi-a-GCST90016958	rs62570196	T	C	0.9314	|| id:ebi-a-GCST90016958	TRUE	reported	igd	25.9534
	2	60484909	0.197786	0.0410495	5.97008e-07	14306	ebi-a-GCST90016958	rs6545794	G	A	0.9115	|| id:ebi-a-GCST90016958	TRUE	reported	igd	23.2154
	2	2649472	0.123489	0.0266695	3.23802e-06	14306	ebi-a-GCST90016958	rs67832247	T	C	0.7306	|| id:ebi-a-GCST90016958	TRUE	reported	igd	21.4401
	10	95286954	0.148942	0.0318366	2.83374e-06	14306	ebi-a-GCST90016958	rs7077363	G	A	0.164	|| id:ebi-a-GCST90016958	TRUE	reported	igd	21.8867
	12	102525047	0.101088	0.0225594	6.40088e-06	14306	ebi-a-GCST90016958	rs7314815	G	A	0.503	|| id:ebi-a-GCST90016958	TRUE	reported	igd	20.0791
	3	9968555	0.134158	0.0301427	8.19426e-06	14306	ebi-a-GCST90016958	rs7627405	T	C	0.833	|| id:ebi-a-GCST90016958	TRUE	reported	igd	19.8093
	9	94128796	0.164855	0.0375128	9.60086e-06	14306	ebi-a-GCST90016958	rs7860510	G	C	0.0974	|| id:ebi-a-GCST90016958	TRUE	reported	igd	19.3128
	chr.exposure	pos.exposure	beta.exposure	se.exposure	pval.exposure	samplesize.exposure	id.exposure	SNP	effect_allele.exposure	other_allele.exposure	eaf.exposure	exposure	mr_keep.exposure	pval_origin.exposure	data_source.exposure	F Value
	10	121356829	0.094316	0.0213513	9.62299e-06	14306	ebi-a-GCST90016959	rs10787984	G	C	0.1759	|| id:ebi-a-GCST90016959	TRUE	reported	igd	19.5129
	15	99492313	0.0746684	0.0164822	6.27004e-06	14306	ebi-a-GCST90016959	rs2715439	C	T	0.4543	|| id:ebi-a-GCST90016959	TRUE	reported	igd	20.5231
	6	67207371	0.126596	0.0268461	4.48528e-06	14306	ebi-a-GCST90016959	rs34583783	G	T	0.1024	|| id:ebi-a-GCST90016959	TRUE	reported	igd	22.2371
genus Actinomyces id.423	6	133007480	0.232634	0.0512044	6.33826e-06	14306	ebi-a-GCST90016959	rs35011108	A	G	0.0636	|| id:ebi-a-GCST90016959	TRUE	reported	igd	20.6411
	6	169224781	0.0749687	0.0167368	7.94273e-06	14306	ebi-a-GCST90016959	rs4073240	G	A	0.3827	|| id:ebi-a-GCST90016959	TRUE	reported	igd	20.0639
	10	4782841	0.0985224	0.0214182	4.49645e-06	14306	ebi-a-GCST90016959	rs4146653	G	A	0.1968	|| id:ebi-a-GCST90016959	TRUE	reported	igd	21.1594
	3	101352439	0.0969809	0.021925	9.82969e-06	14306	ebi-a-GCST90016959	rs71315246	G	A	0.8569	|| id:ebi-a-GCST90016959	TRUE	reported	igd	19.5656
	10	127532121	0.18776	0.0401636	5.91984e-06	14306	ebi-a-GCST90016959	rs7915461	T	C	0.0577	|| id:ebi-a-GCST90016959	TRUE	reported	igd	21.8545
	chr.exposure	pos.exposure	beta.exposure	se.exposure	pval.exposure	samplesize.exposure	id.exposure	SNP	effect_allele.exposure	other_allele.exposure	eaf.exposure	exposure	mr_keep.exposure	pval_origin.exposure	data_source.exposure	F Value
	10	135204950	0.112758	0.0255994	6.35887e-06	14306	ebi-a-GCST90016960	rs1046175	C	G	0.1262	|| id:ebi-a-GCST90016960	TRUE	reported	igd	19.4015
	11	98386085	0.102524	0.0234834	9.74473e-06	14306	ebi-a-GCST90016960	rs11604400	T	C	0.8847	|| id:ebi-a-GCST90016960	TRUE	reported	igd	19.0603
	5	31991834	0.104884	0.0234695	4.41255e-06	14306	ebi-a-GCST90016960	rs12522517	T	A	0.8728	|| id:ebi-a-GCST90016960	TRUE	reported	igd	19.9715
	7	48844151	0.143237	0.0311654	4.8136e-06	14306	ebi-a-GCST90016960	rs13231526	C	A	0.0636	|| id:ebi-a-GCST90016960	TRUE	reported	igd	21.1235
genus Adlercreutzia id.812	1	201061818	0.0922959	0.0192121	1.39878e-06	14306	ebi-a-GCST90016960	rs2147798	C	G	0.1958	|| id:ebi-a-GCST90016960	TRUE	reported	igd	23.0789
	18	75009770	0.119225	0.0251081	2.04593e-06	14306	ebi-a-GCST90016960	rs2717140	T	C	0.8887	|| id:ebi-a-GCST90016960	TRUE	reported	igd	22.5479
	3	105355971	0.0699243	0.0158036	9.60506e-06	14306	ebi-a-GCST90016960	rs55719207	A	G	0.5825	|| id:ebi-a-GCST90016960	TRUE	reported	igd	19.5769
	1	69444163	0.0953084	0.0210752	5.2342e-06	14306	ebi-a-GCST90016960	rs6664405	C	T	0.8559	|| id:ebi-a-GCST90016960	TRUE	reported	igd	20.4512
	4	171281359	0.083381	0.0168901	9.769e-07	14306	ebi-a-GCST90016960	rs7680684	T	C	0.675	|| id:ebi-a-GCST90016960	TRUE	reported	igd	24.3708
	5	94059857	0.11324	0.0232586	1.57358e-06	14306	ebi-a-GCST90016960	rs80078995	T	A	0.8658	|| id:ebi-a-GCST90016960	TRUE	reported	igd	23.7046
	6	123909083	0.0734512	0.0155789	2.54419e-06	14306	ebi-a-GCST90016960	rs9490822	T	C	0.5527	|| id:ebi-a-GCST90016960	TRUE	reported	igd	22.2292
	17	48864179	0.0749219	0.016833	8.21675e-06	14306	ebi-a-GCST90016960	rs9915817	T	C	0.329	|| id:ebi-a-GCST90016960	TRUE	reported	igd	19.8105
	chr.exposure	pos.exposure	beta.exposure	se.exposure	pval.exposure	samplesize.exposure	id.exposure	SNP	effect_allele.exposure	other_allele.exposure	eaf.exposure	exposure	mr_keep.exposure	pval_origin.exposure	data_source.exposure	F Value
	1	105422565	0.0655855	0.0142236	4.0635e-06	14306	ebi-a-GCST90016961	rs11184341	G	C	0.2783	|| id:ebi-a-GCST90016961	TRUE	reported	igd	21.2616
	12	130309670	0.0911199	0.0196748	3.39234e-06	14306	ebi-a-GCST90016961	rs111862613	T	C	0.166	|| id:ebi-a-GCST90016961	TRUE	reported	igd	21.4489
	18	49473635	0.204406	0.0431629	3.01141e-06	14306	ebi-a-GCST90016961	rs117107102	A	G	0.0447	|| id:ebi-a-GCST90016961	TRUE	reported	igd	22.4267
	4	95027272	0.0750473	0.0150184	6.58385e-07	14306	ebi-a-GCST90016961	rs11729256	T	C	0.2386	|| id:ebi-a-GCST90016961	TRUE	reported	igd	24.9702
	15	97570657	0.061772	0.0130954	2.2648e-06	14306	ebi-a-GCST90016961	rs12908520	G	A	0.4563	|| id:ebi-a-GCST90016961	TRUE	reported	igd	22.2508
genus Akkermansia id.4037	16	81063149	0.0745352	0.0156201	2.71569e-06	14306	ebi-a-GCST90016961	rs2602429	C	T	0.2217	|| id:ebi-a-GCST90016961	TRUE	reported	igd	22.7696
	10	11389614	0.0641175	0.0140999	5.21939e-06	14306	ebi-a-GCST90016961	rs3995795	C	T	0.3181	|| id:ebi-a-GCST90016961	TRUE	reported	igd	20.6786
	10	5064327	0.0685454	0.0147701	2.99799e-06	14306	ebi-a-GCST90016961	rs4242783	G	A	0.2873	|| id:ebi-a-GCST90016961	TRUE	reported	igd	21.5372
	11	130280667	0.0649225	0.0135934	1.1036e-06	14306	ebi-a-GCST90016961	rs4936098	A	G	0.34	|| id:ebi-a-GCST90016961	TRUE	reported	igd	22.8105
	1	41074472	0.0760539	0.0167769	6.32121e-06	14306	ebi-a-GCST90016961	rs61779207	A	G	0.8221	|| id:ebi-a-GCST90016961	TRUE	reported	igd	20.5504
	4	100544188	0.112623	0.0236434	1.4802e-06	14306	ebi-a-GCST90016961	rs74542928	T	C	0.0785	|| id:ebi-a-GCST90016961	TRUE	reported	igd	22.69
	6	56341481	0.0703407	0.0147133	2.59884e-06	14306	ebi-a-GCST90016961	rs9349825	G	A	0.7207	|| id:ebi-a-GCST90016961	TRUE	reported	igd	22.8556
	20	31867840	0.0632957	0.0143777	9.17128e-06	14306	ebi-a-GCST90016961	rs941682	A	G	0.6889	|| id:ebi-a-GCST90016961	TRUE	reported	igd	19.3807
	chr.exposure	pos.exposure	beta.exposure	se.exposure	pval.exposure	samplesize.exposure	id.exposure	SNP	effect_allele.exposure	other_allele.exposure	eaf.exposure	exposure	mr_keep.exposure	pval_origin.exposure	data_source.exposure	F Value
	13	38057357	0.0758558	0.0171182	3.59062e-06	14306	ebi-a-GCST90016962	rs1107244	G	A	0.0785	|| id:ebi-a-GCST90016962	TRUE	reported	igd	19.6364
	7	62443498	0.0528793	0.0109389	1.44961e-06	14306	ebi-a-GCST90016962	rs11769002	A	G	0.5994	|| id:ebi-a-GCST90016962	TRUE	reported	igd	23.3681
	5	177755179	0.0981222	0.0218272	9.29566e-06	14306	ebi-a-GCST90016962	rs11958296	G	A	0.9294	|| id:ebi-a-GCST90016962	TRUE	reported	igd	20.2087
	2	178000949	0.0776618	0.0172986	8.20729e-06	14306	ebi-a-GCST90016962	rs12990744	T	C	0.8767	|| id:ebi-a-GCST90016962	TRUE	reported	igd	20.1555
	9	14080129	0.0520061	0.0113942	5.27582e-06	14306	ebi-a-GCST90016962	rs1689282	C	A	0.66	|| id:ebi-a-GCST90016962	TRUE	reported	igd	20.8325
	10	127787142	0.0813969	0.0191632	9.10144e-06	14306	ebi-a-GCST90016962	rs2290844	C	T	0.1133	|| id:ebi-a-GCST90016962	TRUE	reported	igd	18.0418
	8	144428720	0.080524	0.0184702	7.11836e-06	14306	ebi-a-GCST90016962	rs2450745	C	A	0.9175	|| id:ebi-a-GCST90016962	TRUE	reported	igd	19.0067
genus Alistipes id.968	11	130887552	0.0580945	0.0131432	8.77708e-06	14306	ebi-a-GCST90016962	rs2875322	C	T	0.7932	|| id:ebi-a-GCST90016962	TRUE	reported	igd	19.5374
	17	52776479	0.048202	0.0106868	7.00745e-06	14306	ebi-a-GCST90016962	rs34417064	G	A	0.4881	|| id:ebi-a-GCST90016962	TRUE	reported	igd	20.3439
	20	41191335	0.0652428	0.0146155	7.4967e-06	14306	ebi-a-GCST90016962	rs4810359	G	A	0.8529	|| id:ebi-a-GCST90016962	TRUE	reported	igd	19.9268
	9	112120264	0.0492647	0.0109733	7.50361e-06	14306	ebi-a-GCST90016962	rs62576416	T	C	0.3976	|| id:ebi-a-GCST90016962	TRUE	reported	igd	20.1557
	7	135778919	0.0634575	0.0137846	3.9158e-06	14306	ebi-a-GCST90016962	rs67281112	G	C	0.2167	|| id:ebi-a-GCST90016962	TRUE	reported	igd	21.1923
	1	19790706	0.0532404	0.0110864	1.65124e-06	14306	ebi-a-GCST90016962	rs67705352	G	T	0.6262	|| id:ebi-a-GCST90016962	TRUE	reported	igd	23.0622
	11	17511427	0.0524955	0.0109584	1.78423e-06	14306	ebi-a-GCST90016962	rs7129639	A	C	0.5984	|| id:ebi-a-GCST90016962	TRUE	reported	igd	22.9483
	21	40580258	0.049002	0.010717	4.83615e-06	14306	ebi-a-GCST90016962	rs8130320	G	A	0.5179	|| id:ebi-a-GCST90016962	TRUE	reported	igd	20.9065
	chr.exposure	pos.exposure	beta.exposure	se.exposure	pval.exposure	samplesize.exposure	id.exposure	SNP	effect_allele.exposure	other_allele.exposure	eaf.exposure	exposure	mr_keep.exposure	pval_origin.exposure	data_source.exposure	F Value
	5	114286707	0.115769	0.0248626	3.58798e-06	14306	ebi-a-GCST90016963	rs1901739	T	G	0.495	|| id:ebi-a-GCST90016963	TRUE	reported	igd	21.6816
	12	28018998	0.146322	0.0320852	5.72321e-06	14306	ebi-a-GCST90016963	rs35110698	C	T	0.8509	|| id:ebi-a-GCST90016963	TRUE	reported	igd	20.7974
	9	100150556	0.146679	0.0297186	1.20629e-06	14306	ebi-a-GCST90016963	rs35778461	C	T	0.1918	|| id:ebi-a-GCST90016963	TRUE	reported	igd	24.3601
genus Allisonella id.2174	11	88632972	0.112231	0.0251681	9.41109e-06	14306	ebi-a-GCST90016963	rs594561	C	T	0.4414	|| id:ebi-a-GCST90016963	TRUE	reported	igd	19.885
	9	79110160	0.168974	0.0296976	3.56574e-08	14306	ebi-a-GCST90016963	rs602075	A	G	0.2306	|| id:ebi-a-GCST90016963	TRUE	reported	igd	32.3741
	2	33607071	0.149152	0.0316484	3.34511e-06	14306	ebi-a-GCST90016963	rs6742198	G	A	0.1958	|| id:ebi-a-GCST90016963	TRUE	reported	igd	22.2103
	18	75370866	0.175203	0.0404474	4.88394e-06	14306	ebi-a-GCST90016963	rs685403	C	G	0.8917	|| id:ebi-a-GCST90016963	TRUE	reported	igd	18.763
	7	137968010	0.148523	0.0334857	6.08751e-06	14306	ebi-a-GCST90016963	rs76904847	G	A	0.1899	|| id:ebi-a-GCST90016963	TRUE	reported	igd	19.6729
	10	122413451	0.167966	0.0373586	8.87279e-06	14306	ebi-a-GCST90016963	rs7898615	T	G	0.1153	|| id:ebi-a-GCST90016963	TRUE	reported	igd	20.2144
	chr.exposure	pos.exposure	beta.exposure	se.exposure	pval.exposure	samplesize.exposure	id.exposure	SNP	effect_allele.exposure	other_allele.exposure	eaf.exposure	exposure	mr_keep.exposure	pval_origin.exposure	data_source.exposure	F Value
	8	69994816	0.145669	0.0290678	9.63718e-07	14306	ebi-a-GCST90016964	rs12675596	G	T	0.2445	|| id:ebi-a-GCST90016964	TRUE	reported	igd	25.1137
	3	79794395	0.125564	0.0280409	9.27129e-06	14306	ebi-a-GCST90016964	rs17380632	A	T	0.3032	|| id:ebi-a-GCST90016964	TRUE	reported	igd	20.0515
genus Alloprevotella id.961	21	36053643	0.138234	0.0308961	8.36758e-06	14306	ebi-a-GCST90016964	rs2154444	T	G	0.2227	|| id:ebi-a-GCST90016964	TRUE	reported	igd	20.0181
	21	40993008	0.156037	0.0344392	8.84199e-06	14306	ebi-a-GCST90016964	rs34619204	A	G	0.8002	|| id:ebi-a-GCST90016964	TRUE	reported	igd	20.5281
	1	234126516	0.126418	0.0282207	8.58361e-06	14306	ebi-a-GCST90016964	rs4364940	A	G	0.2793	|| id:ebi-a-GCST90016964	TRUE	reported	igd	20.067
	3	152805600	0.119599	0.0259446	4.99057e-06	14306	ebi-a-GCST90016964	rs4680035	G	A	0.4543	|| id:ebi-a-GCST90016964	TRUE	reported	igd	21.2501
	4	189076705	0.161506	0.0359102	7.93615e-06	14306	ebi-a-GCST90016964	rs58212166	G	A	0.8668	|| id:ebi-a-GCST90016964	TRUE	reported	igd	20.2275
	chr.exposure	pos.exposure	beta.exposure	se.exposure	pval.exposure	samplesize.exposure	id.exposure	SNP	effect_allele.exposure	other_allele.exposure	eaf.exposure	exposure	mr_keep.exposure	pval_origin.exposure	data_source.exposure	F Value
	11	1051715	0.0953524	0.02006	2.23496e-06	14306	ebi-a-GCST90016965	rs10794359	C	T	0.5129	|| id:ebi-a-GCST90016965	TRUE	reported	igd	22.5944
	2	3838940	0.0923834	0.0202157	5.53847e-06	14306	ebi-a-GCST90016965	rs1563175	A	C	0.4443	|| id:ebi-a-GCST90016965	TRUE	reported	igd	20.8838
	2	76698142	0.0903417	0.0200239	7.24169e-06	14306	ebi-a-GCST90016965	rs17012738	T	G	0.4076	|| id:ebi-a-GCST90016965	TRUE	reported	igd	20.3554
	14	30991358	0.126337	0.0268919	2.86029e-06	14306	ebi-a-GCST90016965	rs17096874	T	C	0.8191	|| id:ebi-a-GCST90016965	TRUE	reported	igd	22.0708
	10	125294406	0.193107	0.0411187	1.56819e-06	14306	ebi-a-GCST90016965	rs17105491	C	G	0.9404	|| id:ebi-a-GCST90016965	TRUE	reported	igd	22.0555
	17	6450532	0.132603	0.0289802	6.55843e-06	14306	ebi-a-GCST90016965	rs356049	G	A	0.1859	|| id:ebi-a-GCST90016965	TRUE	reported	igd	20.9365
genus Anaerofilum id.2053	12	67167461	0.146775	0.0326594	9.81206e-06	14306	ebi-a-GCST90016965	rs4244069	A	G	0.8867	|| id:ebi-a-GCST90016965	TRUE	reported	igd	20.197
	1	247145690	0.10309	0.0212861	1.48659e-06	14306	ebi-a-GCST90016965	rs4506496	G	A	0.337	|| id:ebi-a-GCST90016965	TRUE	reported	igd	23.4553
	3	129686434	0.10076	0.0202902	6.83109e-07	14306	ebi-a-GCST90016965	rs712981	A	C	0.4185	|| id:ebi-a-GCST90016965	TRUE	reported	igd	24.6606
	2	191139151	0.182586	0.0357284	3.74731e-07	14306	ebi-a-GCST90016965	rs79598899	C	T	0.0825	|| id:ebi-a-GCST90016965	TRUE	reported	igd	26.1161
	12	117811409	0.113003	0.02204	2.6404e-07	14306	ebi-a-GCST90016965	rs816292	C	T	0.7575	|| id:ebi-a-GCST90016965	TRUE	reported	igd	26.288
	9	104339812	0.1364	0.0302372	8.04304e-06	14306	ebi-a-GCST90016965	rs9299345	C	T	0.8827	|| id:ebi-a-GCST90016965	TRUE	reported	igd	20.3491
	chr.exposure	pos.exposure	beta.exposure	se.exposure	pval.exposure	samplesize.exposure	id.exposure	SNP	effect_allele.exposure	other_allele.exposure	eaf.exposure	exposure	mr_keep.exposure	pval_origin.exposure	data_source.exposure	F Value
	11	105615253	0.0835752	0.0192017	7.93542e-06	14306	ebi-a-GCST90016966	rs10502061	A	G	0.0944	|| id:ebi-a-GCST90016966	TRUE	reported	igd	18.9442
	1	67595108	0.197389	0.0458642	7.72058e-06	14306	ebi-a-GCST90016966	rs13376554	A	T	0.0308	|| id:ebi-a-GCST90016966	TRUE	reported	igd	18.5224
	3	171100102	0.0515687	0.0112199	4.68058e-06	14306	ebi-a-GCST90016966	rs2014785	T	C	0.3887	|| id:ebi-a-GCST90016966	TRUE	reported	igd	21.1249
	2	228018671	0.0512653	0.0109555	2.91092e-06	14306	ebi-a-GCST90016966	rs2396460	C	T	0.5606	|| id:ebi-a-GCST90016966	TRUE	reported	igd	21.8969
	10	117383184	0.053089	0.0110983	2.04052e-06	14306	ebi-a-GCST90016966	rs2804244	G	A	0.5447	|| id:ebi-a-GCST90016966	TRUE	reported	igd	22.8821
	9	13525082	0.110013	0.0236302	2.74764e-06	14306	ebi-a-GCST90016966	rs3900776	A	G	0.9294	|| id:ebi-a-GCST90016966	TRUE	reported	igd	21.6747
genus Anaerostipes id.1991	17	2850737	0.0539901	0.0116575	4.42059e-06	14306	ebi-a-GCST90016966	rs60983350	A	G	0.5646	|| id:ebi-a-GCST90016966	TRUE	reported	igd	21.4495
	2	142774333	0.088573	0.0185548	1.44907e-06	14306	ebi-a-GCST90016966	rs62157625	T	C	0.1133	|| id:ebi-a-GCST90016966	TRUE	reported	igd	22.7872
	21	25873624	0.0644965	0.0136702	1.9777e-06	14306	ebi-a-GCST90016966	rs62215703	G	A	0.2197	|| id:ebi-a-GCST90016966	TRUE	reported	igd	22.2599
	9	1582701	0.0500065	0.0112001	6.74481e-06	14306	ebi-a-GCST90016966	rs6474958	G	A	0.5974	|| id:ebi-a-GCST90016966	TRUE	reported	igd	19.9347
	2	39351569	0.0877497	0.0189408	3.32216e-06	14306	ebi-a-GCST90016966	rs6726833	A	C	0.9056	|| id:ebi-a-GCST90016966	TRUE	reported	igd	21.4632
	4	169690814	0.0508482	0.0109075	3.1958e-06	14306	ebi-a-GCST90016966	rs6854026	C	T	0.4881	|| id:ebi-a-GCST90016966	TRUE	reported	igd	21.7321
	16	77574020	0.0750642	0.0150723	5.35476e-07	14306	ebi-a-GCST90016966	rs7193624	C	T	0.1491	|| id:ebi-a-GCST90016966	TRUE	reported	igd	24.8031
	8	128397494	0.0621085	0.0136614	5.84198e-06	14306	ebi-a-GCST90016966	rs7823228	C	G	0.7843	|| id:ebi-a-GCST90016966	TRUE	reported	igd	20.6686
	19	1497547	0.137429	0.0305304	5.33384e-06	14306	ebi-a-GCST90016966	rs78735375	C	A	0.9473	|| id:ebi-a-GCST90016966	TRUE	reported	igd	20.2624
	chr.exposure	pos.exposure	beta.exposure	se.exposure	pval.exposure	samplesize.exposure	id.exposure	SNP	effect_allele.exposure	other_allele.exposure	eaf.exposure	exposure	mr_keep.exposure	pval_origin.exposure	data_source.exposure	F Value
	14	30418008	0.0567088	0.0124877	6.67667e-06	14306	ebi-a-GCST90016967	rs10150232	A	G	0.2535	|| id:ebi-a-GCST90016967	TRUE	reported	igd	20.6222
	11	89040226	0.156465	0.0366032	6.13705e-06	14306	ebi-a-GCST90016967	rs11018566	G	A	0.9483	|| id:ebi-a-GCST90016967	TRUE	reported	igd	18.2724
	4	88163243	0.144356	0.0317524	6.83471e-06	14306	ebi-a-GCST90016967	rs115414803	C	A	0.9414	|| id:ebi-a-GCST90016967	TRUE	reported	igd	20.6689
	8	74713100	0.0774194	0.0177178	6.12675e-06	14306	ebi-a-GCST90016967	rs12056802	C	G	0.0825	|| id:ebi-a-GCST90016967	TRUE	reported	igd	19.0933
	9	78630894	0.0611743	0.0129831	4.27986e-06	14306	ebi-a-GCST90016967	rs1272208	T	G	0.7197	|| id:ebi-a-GCST90016967	TRUE	reported	igd	22.2014
	3	150855371	0.0654996	0.0146188	7.35563e-06	14306	ebi-a-GCST90016967	rs1431492	T	C	0.8171	|| id:ebi-a-GCST90016967	TRUE	reported	igd	20.0749
	2	211663702	0.0660052	0.014908	7.4278e-06	14306	ebi-a-GCST90016967	rs17734739	T	C	0.1899	|| id:ebi-a-GCST90016967	TRUE	reported	igd	19.6028
genus Anaerotruncus id.2054	11	54908652	0.106235	0.0234815	5.41826e-06	14306	ebi-a-GCST90016967	rs2704155	A	T	0.9652	|| id:ebi-a-GCST90016967	TRUE	reported	igd	20.4684
	12	76523655	0.0497004	0.0113402	9.85054e-06	14306	ebi-a-GCST90016967	rs34449434	C	A	0.5437	|| id:ebi-a-GCST90016967	TRUE	reported	igd	19.2078
	2	12200752	0.0576389	0.0122994	2.42058e-06	14306	ebi-a-GCST90016967	rs4669806	G	T	0.2495	|| id:ebi-a-GCST90016967	TRUE	reported	igd	21.9616
	15	33459867	0.0903106	0.0202257	6.62369e-06	14306	ebi-a-GCST90016967	rs6494922	A	G	0.0726	|| id:ebi-a-GCST90016967	TRUE	reported	igd	19.9375
	13	38058413	0.0877135	0.0176745	2.34515e-07	14306	ebi-a-GCST90016967	rs6563550	T	C	0.0785	|| id:ebi-a-GCST90016967	TRUE	reported	igd	24.6285
	14	77502546	0.0539336	0.0118903	7.54988e-06	14306	ebi-a-GCST90016967	rs7155595	C	A	0.3091	|| id:ebi-a-GCST90016967	TRUE	reported	igd	20.5747
	4	172808992	0.0497815	0.0110573	6.91879e-06	14306	ebi-a-GCST90016967	rs7675045	T	A	0.5278	|| id:ebi-a-GCST90016967	TRUE	reported	igd	20.2693
	14	30607199	0.0554447	0.0117854	2.28297e-06	14306	ebi-a-GCST90016967	rs8005030	C	T	0.3022	|| id:ebi-a-GCST90016967	TRUE	reported	igd	22.1325
	6	165015261	0.050618	0.011049	4.22328e-06	14306	ebi-a-GCST90016967	rs9347879	T	C	0.4602	|| id:ebi-a-GCST90016967	TRUE	reported	igd	20.9877
	chr.exposure	pos.exposure	beta.exposure	se.exposure	pval.exposure	samplesize.exposure	id.exposure	SNP	effect_allele.exposure	other_allele.exposure	eaf.exposure	exposure	mr_keep.exposure	pval_origin.exposure	data_source.exposure	F Value
	1	10644351	0.0740746	0.0147633	1.79511e-06	14306	ebi-a-GCST90016968	rs11585893	G	A	0.8519	|| id:ebi-a-GCST90016968	TRUE	reported	igd	25.1751
	6	41519430	0.059205	0.0131195	7.48497e-06	14306	ebi-a-GCST90016968	rs13207588	G	A	0.7674	|| id:ebi-a-GCST90016968	TRUE	reported	igd	20.3649
	1	102960989	0.0592004	0.0132244	6.73008e-06	14306	ebi-a-GCST90016968	rs1340391	C	T	0.8082	|| id:ebi-a-GCST90016968	TRUE	reported	igd	20.04
	19	24342250	0.0880978	0.0187002	2.68683e-06	14306	ebi-a-GCST90016968	rs17619981	T	G	0.0656	|| id:ebi-a-GCST90016968	TRUE	reported	igd	22.1941
	14	22045949	0.0782325	0.0167634	5.01822e-06	14306	ebi-a-GCST90016968	rs2023437	C	T	0.8757	|| id:ebi-a-GCST90016968	TRUE	reported	igd	21.7796
genus Bacteroides id.918	3	62019400	0.0528153	0.0117124	7.64945e-06	14306	ebi-a-GCST90016968	rs2366421	A	T	0.7664	|| id:ebi-a-GCST90016968	TRUE	reported	igd	20.3342
	9	112855426	0.0607475	0.0129865	3.4209e-06	14306	ebi-a-GCST90016968	rs495004	G	C	0.7903	|| id:ebi-a-GCST90016968	TRUE	reported	igd	21.8813
	20	58605432	0.0812515	0.0164479	6.80973e-07	14306	ebi-a-GCST90016968	rs66474973	G	T	0.1153	|| id:ebi-a-GCST90016968	TRUE	reported	igd	24.4029
	3	77215327	0.0488038	0.0107412	5.8626e-06	14306	ebi-a-GCST90016968	rs66710942	C	T	0.4155	|| id:ebi-a-GCST90016968	TRUE	reported	igd	20.6444
	3	10593224	0.0538565	0.0105251	3.37909e-07	14306	ebi-a-GCST90016968	rs6795673	C	T	0.4115	|| id:ebi-a-GCST90016968	TRUE	reported	igd	26.1833
	13	24910476	0.0604456	0.0129128	2.12711e-06	14306	ebi-a-GCST90016968	rs9507307	C	T	0.1899	|| id:ebi-a-GCST90016968	TRUE	reported	igd	21.9123
	chr.exposure	pos.exposure	beta.exposure	se.exposure	pval.exposure	samplesize.exposure	id.exposure	SNP	effect_allele.exposure	other_allele.exposure	eaf.exposure	exposure	mr_keep.exposure	pval_origin.exposure	data_source.exposure	F Value
	6	148601905	0.0956023	0.0212961	8.91908e-06	14306	ebi-a-GCST90016969	rs11155559	T	C	0.0954	|| id:ebi-a-GCST90016969	TRUE	reported	igd	20.1529
	2	180020849	0.098992	0.0214121	7.31122e-06	14306	ebi-a-GCST90016969	rs113258194	A	G	0.1024	|| id:ebi-a-GCST90016969	TRUE	reported	igd	21.3738
	15	87145913	0.0550716	0.0120039	4.94527e-06	14306	ebi-a-GCST90016969	rs12909713	T	C	0.5308	|| id:ebi-a-GCST90016969	TRUE	reported	igd	21.048
	7	122021518	0.0583747	0.0123176	2.29018e-06	14306	ebi-a-GCST90016969	rs13242616	C	T	0.6302	|| id:ebi-a-GCST90016969	TRUE	reported	igd	22.4593
	6	23435415	0.0559495	0.0119716	3.00296e-06	14306	ebi-a-GCST90016969	rs199035	G	A	0.5089	|| id:ebi-a-GCST90016969	TRUE	reported	igd	21.8418
	7	10076378	0.0915241	0.0194623	3.82631e-06	14306	ebi-a-GCST90016969	rs2057922	G	C	0.1064	|| id:ebi-a-GCST90016969	TRUE	reported	igd	22.1148
	4	5730954	0.0697176	0.0139537	4.65029e-07	14306	ebi-a-GCST90016969	rs2276875	G	A	0.7455	|| id:ebi-a-GCST90016969	TRUE	reported	igd	24.9635
	6	110831148	0.165859	0.0337309	8.50883e-07	14306	ebi-a-GCST90016969	rs2428166	A	G	0.9513	|| id:ebi-a-GCST90016969	TRUE	reported	igd	24.1781
	8	25834694	0.0791324	0.0174957	6.47635e-06	14306	ebi-a-GCST90016969	rs28418786	G	C	0.8439	|| id:ebi-a-GCST90016969	TRUE	reported	igd	20.4572
genus Barnesiella id.944	1	206216607	0.09152	0.0210002	7.93414e-06	14306	ebi-a-GCST90016969	rs28479800	T	A	0.9026	|| id:ebi-a-GCST90016969	TRUE	reported	igd	18.9926
	3	181589155	0.0917125	0.0190133	2.94761e-06	14306	ebi-a-GCST90016969	rs35177866	A	G	0.1243	|| id:ebi-a-GCST90016969	TRUE	reported	igd	23.2671
	12	54872438	0.121478	0.025184	1.19064e-06	14306	ebi-a-GCST90016969	rs60316894	T	C	0.9404	|| id:ebi-a-GCST90016969	TRUE	reported	igd	23.2673
	3	44327429	0.0690763	0.0149374	4.2416e-06	14306	ebi-a-GCST90016969	rs62251337	G	A	0.8419	|| id:ebi-a-GCST90016969	TRUE	reported	igd	21.3849
	4	102616869	0.114369	0.0253873	6.76176e-06	14306	ebi-a-GCST90016969	rs72684847	C	T	0.9344	|| id:ebi-a-GCST90016969	TRUE	reported	igd	20.2947
	8	105458416	0.0778559	0.017164	6.77657e-06	14306	ebi-a-GCST90016969	rs76181748	T	C	0.8559	|| id:ebi-a-GCST90016969	TRUE	reported	igd	20.5753
	5	54107036	0.0891491	0.0195601	3.16352e-06	14306	ebi-a-GCST90016969	rs77455852	G	T	0.8787	|| id:ebi-a-GCST90016969	TRUE	reported	igd	20.7726
	4	114546595	0.0818645	0.0176441	4.23302e-06	14306	ebi-a-GCST90016969	rs79795328	G	A	0.8748	|| id:ebi-a-GCST90016969	TRUE	reported	igd	21.5274
	chr.exposure	pos.exposure	beta.exposure	se.exposure	pval.exposure	samplesize.exposure	id.exposure	SNP	effect_allele.exposure	other_allele.exposure	eaf.exposure	exposure	mr_keep.exposure	pval_origin.exposure	data_source.exposure	F Value
	12	20378911	0.0624207	0.0129438	1.6452e-06	14306	ebi-a-GCST90016970	rs10841473	C	G	0.7296	|| id:ebi-a-GCST90016970	TRUE	reported	igd	23.2559
	1	207003374	0.0619356	0.0138937	7.9965e-06	14306	ebi-a-GCST90016970	rs12022129	G	A	0.2207	|| id:ebi-a-GCST90016970	TRUE	reported	igd	19.8722
	2	192878532	0.0562696	0.0122617	4.07258e-06	14306	ebi-a-GCST90016970	rs13020688	G	A	0.3529	|| id:ebi-a-GCST90016970	TRUE	reported	igd	21.0594
	2	136616754	0.119703	0.0127294	1.2782e-20	14306	ebi-a-GCST90016970	rs182549	C	T	0.4911	|| id:ebi-a-GCST90016970	TRUE	reported	igd	88.4289
	2	137602926	0.0674036	0.0132319	3.50865e-07	14306	ebi-a-GCST90016970	rs1961273	C	T	0.2714	|| id:ebi-a-GCST90016970	TRUE	reported	igd	25.9491
	10	126089703	0.0712624	0.015983	8.04711e-06	14306	ebi-a-GCST90016970	rs2491158	G	A	0.1819	|| id:ebi-a-GCST90016970	TRUE	reported	igd	19.8794
	7	48090746	0.070741	0.0157926	7.49894e-06	14306	ebi-a-GCST90016970	rs2686790	T	C	0.1153	|| id:ebi-a-GCST90016970	TRUE	reported	igd	20.0648
	2	49906864	0.0562084	0.0117923	1.92832e-06	14306	ebi-a-GCST90016970	rs4567981	T	A	0.4394	|| id:ebi-a-GCST90016970	TRUE	reported	igd	22.7198
genus Bifidobacterium id.436	5	521096	0.0534239	0.0117431	5.77936e-06	14306	ebi-a-GCST90016970	rs4957061	T	C	0.4652	|| id:ebi-a-GCST90016970	TRUE	reported	igd	20.6969
	17	72897722	0.0637641	0.0138746	5.19457e-06	14306	ebi-a-GCST90016970	rs540489	G	T	0.7664	|| id:ebi-a-GCST90016970	TRUE	reported	igd	21.1209
	4	1517826	0.0546319	0.0121139	6.67022e-06	14306	ebi-a-GCST90016970	rs55888705	A	G	0.3867	|| id:ebi-a-GCST90016970	TRUE	reported	igd	20.3388
	22	18354272	0.0536216	0.0120801	8.99953e-06	14306	ebi-a-GCST90016970	rs5746486	C	T	0.6461	|| id:ebi-a-GCST90016970	TRUE	reported	igd	19.7033
	2	189805784	0.0624643	0.0131205	2.17245e-06	14306	ebi-a-GCST90016970	rs62181700	A	G	0.7187	|| id:ebi-a-GCST90016970	TRUE	reported	igd	22.6654
	13	112859829	0.112428	0.0201813	1.08368e-08	14306	ebi-a-GCST90016970	rs7322849	T	C	0.0964	|| id:ebi-a-GCST90016970	TRUE	reported	igd	31.0349
	5	142793467	0.0953566	0.0209236	4.38157e-06	14306	ebi-a-GCST90016970	rs73797465	G	T	0.9135	|| id:ebi-a-GCST90016970	TRUE	reported	igd	20.7696
	21	31861790	0.232354	0.0505979	4.86351e-06	14306	ebi-a-GCST90016970	rs75344046	C	T	0.0497	|| id:ebi-a-GCST90016970	TRUE	reported	igd	21.088
	5	169748189	0.0846055	0.0184003	3.95667e-06	14306	ebi-a-GCST90016970	rs76671854	G	C	0.8748	|| id:ebi-a-GCST90016970	TRUE	reported	igd	21.1421
	6	14617591	0.0558234	0.0121219	3.571e-06	14306	ebi-a-GCST90016970	rs857444	C	T	0.3608	|| id:ebi-a-GCST90016970	TRUE	reported	igd	21.2076
	chr.exposure	pos.exposure	beta.exposure	se.exposure	pval.exposure	samplesize.exposure	id.exposure	SNP	effect_allele.exposure	other_allele.exposure	eaf.exposure	exposure	mr_keep.exposure	pval_origin.exposure	data_source.exposure	F Value
	13	102402685	0.0680947	0.015503	7.71543e-06	14306	ebi-a-GCST90016971	rs11069458	C	T	0.8101	|| id:ebi-a-GCST90016971	TRUE	reported	igd	19.2928
	6	20505628	0.128112	0.0261358	8.62323e-07	14306	ebi-a-GCST90016971	rs116261629	G	C	0.0716	|| id:ebi-a-GCST90016971	TRUE	reported	igd	24.0275
	1	103299921	0.0692654	0.0150148	4.24033e-06	14306	ebi-a-GCST90016971	rs1241171	A	G	0.7843	|| id:ebi-a-GCST90016971	TRUE	reported	igd	21.2811
	9	4940871	0.0826826	0.0170621	1.1229e-06	14306	ebi-a-GCST90016971	rs1571225	C	T	0.1491	|| id:ebi-a-GCST90016971	TRUE	reported	igd	23.4835
	7	123174986	0.118509	0.026742	7.36953e-06	14306	ebi-a-GCST90016971	rs1917709	A	T	0.0537	|| id:ebi-a-GCST90016971	TRUE	reported	igd	19.6388
	12	100786847	0.0564589	0.0126935	9.07215e-06	14306	ebi-a-GCST90016971	rs1969927	G	A	0.3797	|| id:ebi-a-GCST90016971	TRUE	reported	igd	19.7835
	7	9510367	0.0617228	0.0140174	8.63257e-06	14306	ebi-a-GCST90016971	rs2713349	A	T	0.2545	|| id:ebi-a-GCST90016971	TRUE	reported	igd	19.389
	7	47211732	0.0627416	0.0139456	6.33257e-06	14306	ebi-a-GCST90016971	rs2728491	T	G	0.6899	|| id:ebi-a-GCST90016971	TRUE	reported	igd	20.2412
genus Bilophila id.3170	20	61980991	0.0766479	0.0160642	1.78875e-06	14306	ebi-a-GCST90016971	rs3827020	C	T	0.1899	|| id:ebi-a-GCST90016971	TRUE	reported	igd	22.7658
	18	3765773	0.073288	0.016799	7.14661e-06	14306	ebi-a-GCST90016971	rs4798126	G	A	0.1501	|| id:ebi-a-GCST90016971	TRUE	reported	igd	19.0326
	15	50011554	0.0613623	0.0133436	4.70945e-06	14306	ebi-a-GCST90016971	rs542415	C	T	0.66	|| id:ebi-a-GCST90016971	TRUE	reported	igd	21.1474
	8	90878338	0.0624818	0.0141485	8.0562e-06	14306	ebi-a-GCST90016971	rs60178956	A	G	0.7654	|| id:ebi-a-GCST90016971	TRUE	reported	igd	19.5023
	3	194419531	0.112729	0.0241633	3.11322e-06	14306	ebi-a-GCST90016971	rs6793291	C	A	0.0924	|| id:ebi-a-GCST90016971	TRUE	reported	igd	21.765
	8	109990939	0.123209	0.026882	5.62264e-06	14306	ebi-a-GCST90016971	rs72676854	T	C	0.0656	|| id:ebi-a-GCST90016971	TRUE	reported	igd	21.0069
	7	138583840	0.0670097	0.0137701	1.76954e-06	14306	ebi-a-GCST90016971	rs7802841	C	A	0.3509	|| id:ebi-a-GCST90016971	TRUE	reported	igd	23.6811
	14	67640571	0.0571991	0.0125673	5.47533e-06	14306	ebi-a-GCST90016971	rs8013541	T	A	0.5765	|| id:ebi-a-GCST90016971	TRUE	reported	igd	20.7155
	17	9121579	0.102702	0.0233878	9.06692e-06	14306	ebi-a-GCST90016971	rs9899990	G	A	0.9344	|| id:ebi-a-GCST90016971	TRUE	reported	igd	19.2832
	chr.exposure	pos.exposure	beta.exposure	se.exposure	pval.exposure	samplesize.exposure	id.exposure	SNP	effect_allele.exposure	other_allele.exposure	eaf.exposure	exposure	mr_keep.exposure	pval_origin.exposure	data_source.exposure	F Value
genus Blautia id.1992	1	175757311	0.206605	0.043992	5.18597e-06	14306	ebi-a-GCST90016972	rs115043014	A	G	0.9563	|| id:ebi-a-GCST90016972	TRUE	reported	igd	22.0564
	1	219117743	0.0575596	0.0133492	7.16391e-06	14306	ebi-a-GCST90016972	rs2788271	G	T	0.835	|| id:ebi-a-GCST90016972	TRUE	reported	igd	18.592
	chr.exposure	pos.exposure	beta.exposure	se.exposure	pval.exposure	samplesize.exposure	id.exposure	SNP	effect_allele.exposure	other_allele.exposure	eaf.exposure	exposure	mr_keep.exposure	pval_origin.exposure	data_source.exposure	F Value
	2	191304149	0.0549699	0.0123563	8.58638e-06	14306	ebi-a-GCST90016973	rs10084203	A	G	0.2416	|| id:ebi-a-GCST90016973	TRUE	reported	igd	19.7912
	1	67379595	0.0701199	0.0158213	9.57679e-06	14306	ebi-a-GCST90016973	rs12034718	A	G	0.165	|| id:ebi-a-GCST90016973	TRUE	reported	igd	19.6426
	13	27018240	0.262206	0.0564729	5.79189e-06	14306	ebi-a-GCST90016973	rs12585793	C	T	0.9473	|| id:ebi-a-GCST90016973	TRUE	reported	igd	21.5578
	4	7460153	0.0506956	0.011024	3.87258e-06	14306	ebi-a-GCST90016973	rs2017189	T	G	0.5785	|| id:ebi-a-GCST90016973	TRUE	reported	igd	21.1477
genus Butyricicoccus id.2055	10	126908208	0.0614216	0.0135979	7.38482e-06	14306	ebi-a-GCST90016973	rs4962426	G	T	0.1978	|| id:ebi-a-GCST90016973	TRUE	reported	igd	20.4032
	2	153453410	0.0828027	0.0167401	7.61939e-07	14306	ebi-a-GCST90016973	rs56221232	T	C	0.1083	|| id:ebi-a-GCST90016973	TRUE	reported	igd	24.4666
	7	157688150	0.224039	0.0494959	5.93772e-06	14306	ebi-a-GCST90016973	rs62478070	T	G	0.0437	|| id:ebi-a-GCST90016973	TRUE	reported	igd	20.4884
	13	100213990	0.0815733	0.0183167	5.51785e-06	14306	ebi-a-GCST90016973	rs7322368	T	C	0.0845	|| id:ebi-a-GCST90016973	TRUE	reported	igd	19.8336
	18	22899113	0.0619423	0.0139942	6.79704e-06	14306	ebi-a-GCST90016973	rs75238760	T	A	0.1938	|| id:ebi-a-GCST90016973	TRUE	reported	igd	19.592
	chr.exposure	pos.exposure	beta.exposure	se.exposure	pval.exposure	samplesize.exposure	id.exposure	SNP	effect_allele.exposure	other_allele.exposure	eaf.exposure	exposure	mr_keep.exposure	pval_origin.exposure	data_source.exposure	F Value
	11	56664962	0.135265	0.0298411	6.55164e-06	14306	ebi-a-GCST90016974	rs11228830	A	G	0.0706	|| id:ebi-a-GCST90016974	TRUE	reported	igd	20.5467
	21	16550389	0.144881	0.0274574	1.73696e-07	14306	ebi-a-GCST90016974	rs113054641	A	G	0.9155	|| id:ebi-a-GCST90016974	TRUE	reported	igd	27.8422
	12	129438771	0.0862781	0.0196846	6.7007e-06	14306	ebi-a-GCST90016974	rs12304031	A	G	0.8708	|| id:ebi-a-GCST90016974	TRUE	reported	igd	19.2109
	18	34091618	0.122037	0.0269587	6.36649e-06	14306	ebi-a-GCST90016974	rs12458763	A	C	0.0716	|| id:ebi-a-GCST90016974	TRUE	reported	igd	20.492
	19	51465096	0.105056	0.0241047	7.67909e-06	14306	ebi-a-GCST90016974	rs1701950	C	G	0.8976	|| id:ebi-a-GCST90016974	TRUE	reported	igd	18.995
	16	22172866	0.113124	0.0248176	4.76255e-06	14306	ebi-a-GCST90016974	rs1862649	G	A	0.0915	|| id:ebi-a-GCST90016974	TRUE	reported	igd	20.7773
	15	80528373	0.062721	0.0138998	6.87717e-06	14306	ebi-a-GCST90016974	rs2114713	G	T	0.4513	|| id:ebi-a-GCST90016974	TRUE	reported	igd	20.3615
genus Butyricimonas id.945	5	62119947	0.0713357	0.0145396	8.58084e-07	14306	ebi-a-GCST90016974	rs2642760	G	C	0.3767	|| id:ebi-a-GCST90016974	TRUE	reported	igd	24.0718
	1	45082825	0.0694173	0.0150795	5.38158e-06	14306	ebi-a-GCST90016974	rs270727	C	G	0.6779	|| id:ebi-a-GCST90016974	TRUE	reported	igd	21.1915
	5	997217	0.0759694	0.0167617	8.18653e-06	14306	ebi-a-GCST90016974	rs326049	C	G	0.2048	|| id:ebi-a-GCST90016974	TRUE	reported	igd	20.5419
	19	49162501	0.0732608	0.0158324	3.89807e-06	14306	ebi-a-GCST90016974	rs62130338	A	G	0.7376	|| id:ebi-a-GCST90016974	TRUE	reported	igd	21.4116
	5	159867647	0.0872983	0.0174893	7.41908e-07	14306	ebi-a-GCST90016974	rs62390301	C	T	0.8171	|| id:ebi-a-GCST90016974	TRUE	reported	igd	24.9153
	10	72711156	0.0703539	0.0144439	8.85462e-07	14306	ebi-a-GCST90016974	rs7083431	A	C	0.3549	|| id:ebi-a-GCST90016974	TRUE	reported	igd	23.7251
	2	83093264	0.133188	0.0289905	4.80408e-06	14306	ebi-a-GCST90016974	rs71428626	T	G	0.9274	|| id:ebi-a-GCST90016974	TRUE	reported	igd	21.1066
	10	72443070	0.0664154	0.0149766	8.24594e-06	14306	ebi-a-GCST90016974	rs72814525	A	G	0.3231	|| id:ebi-a-GCST90016974	TRUE	reported	igd	19.6658
	3	127468661	0.0653488	0.0137974	2.23398e-06	14306	ebi-a-GCST90016974	rs782080	T	A	0.4066	|| id:ebi-a-GCST90016974	TRUE	reported	igd	22.4327
	3	78740009	0.14948	0.0327073	4.05807e-06	14306	ebi-a-GCST90016974	rs78453362	G	A	0.9423	|| id:ebi-a-GCST90016974	TRUE	reported	igd	20.887
	8	4834406	0.0680719	0.0148172	4.5036e-06	14306	ebi-a-GCST90016974	rs9657374	C	T	0.3022	|| id:ebi-a-GCST90016974	TRUE	reported	igd	21.1059
	chr.exposure	pos.exposure	beta.exposure	se.exposure	pval.exposure	samplesize.exposure	id.exposure	SNP	effect_allele.exposure	other_allele.exposure	eaf.exposure	exposure	mr_keep.exposure	pval_origin.exposure	data_source.exposure	F Value
	6	148403405	0.118065	0.0261271	7.92319e-06	14306	ebi-a-GCST90016975	rs1007475	G	T	0.2942	|| id:ebi-a-GCST90016975	TRUE	reported	igd	20.4202
	7	150596929	0.154775	0.0321539	2.20232e-06	14306	ebi-a-GCST90016975	rs11761679	T	C	0.1561	|| id:ebi-a-GCST90016975	TRUE	reported	igd	23.1704
	10	22587900	0.205013	0.0457138	6.85536e-06	14306	ebi-a-GCST90016975	rs142855850	A	G	0.1014	|| id:ebi-a-GCST90016975	TRUE	reported	igd	20.1126
	9	119693164	0.133784	0.0299444	8.85911e-06	14306	ebi-a-GCST90016975	rs16934069	C	T	0.8012	|| id:ebi-a-GCST90016975	TRUE	reported	igd	19.9608
	17	20575697	0.127488	0.0267936	1.53183e-06	14306	ebi-a-GCST90016975	rs16941336	C	T	0.2644	|| id:ebi-a-GCST90016975	TRUE	reported	igd	22.64
	5	128976021	0.140987	0.0309117	5.51201e-06	14306	ebi-a-GCST90016975	rs17163238	G	A	0.1998	|| id:ebi-a-GCST90016975	TRUE	reported	igd	20.8023
	13	27292666	0.12459	0.0260992	1.80194e-06	14306	ebi-a-GCST90016975	rs4537857	C	T	0.7078	|| id:ebi-a-GCST90016975	TRUE	reported	igd	22.7883
genus Butyrivibrio id.1993	20	811507	0.108349	0.0240008	6.61089e-06	14306	ebi-a-GCST90016975	rs486484	G	A	0.5288	|| id:ebi-a-GCST90016975	TRUE	reported	igd	20.3797
	3	54288503	0.17471	0.0389333	8.18634e-06	14306	ebi-a-GCST90016975	rs4928024	G	A	0.9016	|| id:ebi-a-GCST90016975	TRUE	reported	igd	20.1369
	14	76065563	0.224078	0.0449336	7.86249e-07	14306	ebi-a-GCST90016975	rs72723662	C	T	0.1004	|| id:ebi-a-GCST90016975	TRUE	reported	igd	24.8689
	1	235580646	0.186779	0.0389112	1.70565e-06	14306	ebi-a-GCST90016975	rs7412979	C	G	0.0875	|| id:ebi-a-GCST90016975	TRUE	reported	igd	23.0413
	14	34150977	0.201027	0.0428204	2.45748e-06	14306	ebi-a-GCST90016975	rs74622183	G	A	0.9125	|| id:ebi-a-GCST90016975	TRUE	reported	igd	22.0398
	18	10267733	0.216874	0.0483299	6.66423e-06	14306	ebi-a-GCST90016975	rs77356209	T	C	0.0477	|| id:ebi-a-GCST90016975	TRUE	reported	igd	20.1365
	6	111780705	0.11923	0.0239975	7.69113e-07	14306	ebi-a-GCST90016975	rs7752361	G	A	0.496	|| id:ebi-a-GCST90016975	TRUE	reported	igd	24.6853
	6	21960091	0.119846	0.0253367	3.10656e-06	14306	ebi-a-GCST90016975	rs7763512	G	A	0.3827	|| id:ebi-a-GCST90016975	TRUE	reported	igd	22.3742
	6	53939724	0.117973	0.0259861	5.54958e-06	14306	ebi-a-GCST90016975	rs9349693	A	G	0.3111	|| id:ebi-a-GCST90016975	TRUE	reported	igd	20.6102
	chr.exposure	pos.exposure	beta.exposure	se.exposure	pval.exposure	samplesize.exposure	id.exposure	SNP	effect_allele.exposure	other_allele.exposure	eaf.exposure	exposure	mr_keep.exposure	pval_origin.exposure	data_source.exposure	F Value
	16	80493705	0.098235	0.0197127	7.36055e-07	14306	ebi-a-GCST90016953	rs11150282	T	C	0.3211	|| id:ebi-a-GCST90016953	TRUE	reported	igd	24.8336
	9	24648997	0.20591	0.0455376	7.7398e-06	14306	ebi-a-GCST90016953	rs113884518	C	T	0.9513	|| id:ebi-a-GCST90016953	TRUE	reported	igd	20.4463
	9	122046549	0.126305	0.0279161	4.85959e-06	14306	ebi-a-GCST90016953	rs1221147	T	A	0.1561	|| id:ebi-a-GCST90016953	TRUE	reported	igd	20.4706
	1	230523039	0.0895168	0.0186555	1.27025e-06	14306	ebi-a-GCST90016953	rs16851659	C	G	0.6113	|| id:ebi-a-GCST90016953	TRUE	reported	igd	23.0248
	17	53906328	0.213083	0.0471377	8.05954e-06	14306	ebi-a-GCST90016953	rs28678345	T	C	0.0467	|| id:ebi-a-GCST90016953	TRUE	reported	igd	20.4344
	11	2937631	0.0841649	0.0185948	7.52419e-06	14306	ebi-a-GCST90016953	rs367480	A	G	0.5726	|| id:ebi-a-GCST90016953	TRUE	reported	igd	20.487
unknown family id.1000001214	9	115975389	0.0904264	0.0185253	1.21742e-06	14306	ebi-a-GCST90016953	rs4129395	G	A	0.4264	|| id:ebi-a-GCST90016953	TRUE	reported	igd	23.8265
	7	20010624	0.164631	0.0356037	3.62376e-06	14306	ebi-a-GCST90016953	rs73074665	A	T	0.0855	|| id:ebi-a-GCST90016953	TRUE	reported	igd	21.3812
	18	1008278	0.10413	0.0234459	6.5001e-06	14306	ebi-a-GCST90016953	rs789069	C	A	0.828	|| id:ebi-a-GCST90016953	TRUE	reported	igd	19.725
	15	100747683	0.226103	0.0488017	3.5381e-06	14306	ebi-a-GCST90016953	rs79790072	T	C	0.0567	|| id:ebi-a-GCST90016953	TRUE	reported	igd	21.4656
	15	62055753	0.08346	0.0188504	9.78228e-06	14306	ebi-a-GCST90016953	rs8028558	A	G	0.4046	|| id:ebi-a-GCST90016953	TRUE	reported	igd	19.6027
	3	14306949	0.160521	0.0292752	4.65876e-08	14306	ebi-a-GCST90016953	rs9864379	C	T	0.8867	|| id:ebi-a-GCST90016953	TRUE	reported	igd	30.0652
	chr.exposure	pos.exposure	beta.exposure	se.exposure	pval.exposure	samplesize.exposure	id.exposure	SNP	effect_allele.exposure	other_allele.exposure	eaf.exposure	exposure	mr_keep.exposure	pval_origin.exposure	data_source.exposure	F Value
	5	176287195	0.125105	0.0278674	8.6441e-06	14306	ebi-a-GCST90016954	rs10071529	G	C	0.0875	|| id:ebi-a-GCST90016954	TRUE	reported	igd	20.1538
	8	15406830	0.0772768	0.0172171	6.68852e-06	14306	ebi-a-GCST90016954	rs11779863	A	G	0.7932	|| id:ebi-a-GCST90016954	TRUE	reported	igd	20.1455
	1	61850864	0.103134	0.0241775	8.11204e-06	14306	ebi-a-GCST90016954	rs12566890	G	T	0.9046	|| id:ebi-a-GCST90016954	TRUE	reported	igd	18.1962
	3	165846506	0.0638979	0.0142685	7.28853e-06	14306	ebi-a-GCST90016954	rs13100746	C	T	0.4095	|| id:ebi-a-GCST90016954	TRUE	reported	igd	20.0547
	7	82536037	0.122002	0.0255463	2.15879e-06	14306	ebi-a-GCST90016954	rs17235252	C	T	0.9056	|| id:ebi-a-GCST90016954	TRUE	reported	igd	22.8075
	3	184193482	0.0626209	0.0141623	9.92865e-06	14306	ebi-a-GCST90016954	rs3932485	C	T	0.4284	|| id:ebi-a-GCST90016954	TRUE	reported	igd	19.5511
unknown family id.1000005471	10	3521459	0.0875451	0.0190685	6.61363e-06	14306	ebi-a-GCST90016954	rs515984	C	T	0.826	|| id:ebi-a-GCST90016954	TRUE	reported	igd	21.0781
	2	177374176	0.110864	0.0241355	5.26708e-06	14306	ebi-a-GCST90016954	rs62188991	C	G	0.8887	|| id:ebi-a-GCST90016954	TRUE	reported	igd	21.0993
	1	109845252	0.070592	0.0157049	5.17285e-06	14306	ebi-a-GCST90016954	rs638542	A	G	0.7137	|| id:ebi-a-GCST90016954	TRUE	reported	igd	20.2042
	22	42741466	0.0652658	0.0139773	3.09286e-06	14306	ebi-a-GCST90016954	rs739151	C	G	0.506	|| id:ebi-a-GCST90016954	TRUE	reported	igd	21.8034
	14	46519718	0.230767	0.0489701	2.27641e-06	14306	ebi-a-GCST90016954	rs74603314	T	C	0.0457	|| id:ebi-a-GCST90016954	TRUE	reported	igd	22.2068
	3	3771148	0.0908218	0.0202986	5.15941e-06	14306	ebi-a-GCST90016954	rs76373661	G	A	0.1133	|| id:ebi-a-GCST90016954	TRUE	reported	igd	20.0193
	5	17443654	0.0657351	0.0138979	2.27206e-06	14306	ebi-a-GCST90016954	rs7706512	G	A	0.504	|| id:ebi-a-GCST90016954	TRUE	reported	igd	22.3716
	7	4105705	0.0869495	0.0194509	9.46891e-06	14306	ebi-a-GCST90016954	rs7801843	G	A	0.8708	|| id:ebi-a-GCST90016954	TRUE	reported	igd	19.9827
	9	116711241	0.0624389	0.0139833	6.73256e-06	14306	ebi-a-GCST90016954	rs7853673	A	G	0.4861	|| id:ebi-a-GCST90016954	TRUE	reported	igd	19.9384
	11	112386785	0.0656602	0.0147216	7.73286e-06	14306	ebi-a-GCST90016954	rs949341	G	A	0.3201	|| id:ebi-a-GCST90016954	TRUE	reported	igd	19.8927
	chr.exposure	pos.exposure	beta.exposure	se.exposure	pval.exposure	samplesize.exposure	id.exposure	SNP	effect_allele.exposure	other_allele.exposure	eaf.exposure	exposure	mr_keep.exposure	pval_origin.exposure	data_source.exposure	F Value
	10	2095726	0.104201	0.0206737	6.62796e-07	14306	ebi-a-GCST90016955	rs11251024	G	A	0.33	|| id:ebi-a-GCST90016955	TRUE	reported	igd	25.4043
	11	91589600	0.154539	0.0326288	3.30583e-06	14306	ebi-a-GCST90016955	rs11606187	G	A	0.8926	|| id:ebi-a-GCST90016955	TRUE	reported	igd	22.4323
	6	68934648	0.115344	0.0236958	1.40637e-06	14306	ebi-a-GCST90016955	rs13219468	G	C	0.2256	|| id:ebi-a-GCST90016955	TRUE	reported	igd	23.6945
	2	234081324	0.0929494	0.0201348	3.96826e-06	14306	ebi-a-GCST90016955	rs13385922	T	C	0.4056	|| id:ebi-a-GCST90016955	TRUE	reported	igd	21.3107
	2	200778866	0.0911053	0.0202239	7.73891e-06	14306	ebi-a-GCST90016955	rs166849	G	A	0.3897	|| id:ebi-a-GCST90016955	TRUE	reported	igd	20.2935
	8	18229020	0.10212	0.0198947	3.17424e-07	14306	ebi-a-GCST90016955	rs2172426	T	C	0.5527	|| id:ebi-a-GCST90016955	TRUE	reported	igd	26.3479
	5	10737802	0.0988612	0.0209676	2.61993e-06	14306	ebi-a-GCST90016955	rs267959	A	G	0.3429	|| id:ebi-a-GCST90016955	TRUE	reported	igd	22.2308
	19	887824	0.0908335	0.0209434	6.84353e-06	14306	ebi-a-GCST90016955	rs2930903	C	G	0.3887	|| id:ebi-a-GCST90016955	TRUE	reported	igd	18.8104
unknown family id.1000006161	15	81694972	0.149188	0.0320662	4.28134e-06	14306	ebi-a-GCST90016955	rs4383094	T	C	0.0964	|| id:ebi-a-GCST90016955	TRUE	reported	igd	21.6458
	10	127094261	0.109245	0.0236201	4.32136e-06	14306	ebi-a-GCST90016955	rs55921101	T	A	0.7734	|| id:ebi-a-GCST90016955	TRUE	reported	igd	21.3914
	7	1321675	0.108934	0.021177	2.59579e-07	14306	ebi-a-GCST90016955	rs60583455	T	C	0.3757	|| id:ebi-a-GCST90016955	TRUE	reported	igd	26.4605
	15	97318671	0.0962425	0.0213842	7.10461e-06	14306	ebi-a-GCST90016955	rs60775321	C	T	0.6988	|| id:ebi-a-GCST90016955	TRUE	reported	igd	20.2557
	14	39425971	0.172322	0.0370028	3.79577e-06	14306	ebi-a-GCST90016955	rs72671304	T	C	0.0696	|| id:ebi-a-GCST90016955	TRUE	reported	igd	21.6876
	10	98619568	0.223071	0.0470232	3.38821e-06	14306	ebi-a-GCST90016955	rs7911787	T	G	0.9344	|| id:ebi-a-GCST90016955	TRUE	reported	igd	22.5041
	20	3405239	0.159135	0.0351904	7.36326e-06	14306	ebi-a-GCST90016955	rs8126061	C	T	0.9046	|| id:ebi-a-GCST90016955	TRUE	reported	igd	20.4495
	13	70306831	0.0990709	0.0218149	6.52334e-06	14306	ebi-a-GCST90016955	rs9542068	T	C	0.3211	|| id:ebi-a-GCST90016955	TRUE	reported	igd	20.6246
	chr.exposure	pos.exposure	beta.exposure	se.exposure	pval.exposure	samplesize.exposure	id.exposure	SNP	effect_allele.exposure	other_allele.exposure	eaf.exposure	exposure	mr_keep.exposure	pval_origin.exposure	data_source.exposure	F Value
	8	138638199	0.0834413	0.0180989	4.17311e-06	14306	ebi-a-GCST90016976	rs10090365	G	A	0.4414	|| id:ebi-a-GCST90016976	TRUE	reported	igd	21.2548
	8	123882833	0.092834	0.0199807	3.64083e-06	14306	ebi-a-GCST90016976	rs10108780	G	A	0.7326	|| id:ebi-a-GCST90016976	TRUE	reported	igd	21.587
	9	10611282	0.0834858	0.0182426	5.4718e-06	14306	ebi-a-GCST90016976	rs10809135	T	C	0.4911	|| id:ebi-a-GCST90016976	TRUE	reported	igd	20.9436
	6	109376647	0.12805	0.0285446	4.4152e-06	14306	ebi-a-GCST90016976	rs11153159	C	G	0.8708	|| id:ebi-a-GCST90016976	TRUE	reported	igd	20.1239
	4	52935445	0.0813853	0.0182696	7.67644e-06	14306	ebi-a-GCST90016976	rs12500231	A	T	0.4254	|| id:ebi-a-GCST90016976	TRUE	reported	igd	19.8442
	3	190349049	0.228255	0.0509241	9.4554e-06	14306	ebi-a-GCST90016976	rs2193878	T	A	0.0487	|| id:ebi-a-GCST90016976	TRUE	reported	igd	20.0906
genus Candidatus Soleaferrea id.11350	7	352368	0.104966	0.0240995	5.4114e-06	14306	ebi-a-GCST90016976	rs36155147	C	T	0.3618	|| id:ebi-a-GCST90016976	TRUE	reported	igd	18.9706
	10	82879688	0.0818459	0.0180086	8.33067e-06	14306	ebi-a-GCST90016976	rs386526	C	G	0.5169	|| id:ebi-a-GCST90016976	TRUE	reported	igd	20.6554
	1	224688107	0.112197	0.023186	1.36848e-06	14306	ebi-a-GCST90016976	rs4294381	T	C	0.1799	|| id:ebi-a-GCST90016976	TRUE	reported	igd	23.4159
	3	137945192	0.0986136	0.0215646	5.53184e-06	14306	ebi-a-GCST90016976	rs4678258	T	C	0.2763	|| id:ebi-a-GCST90016976	TRUE	reported	igd	20.9118
	12	115352769	0.0840437	0.0187031	7.88787e-06	14306	ebi-a-GCST90016976	rs6489992	G	A	0.6153	|| id:ebi-a-GCST90016976	TRUE	reported	igd	20.1922
	15	62394540	0.0969304	0.0214221	5.80056e-06	14306	ebi-a-GCST90016976	rs6494306	G	A	0.8032	|| id:ebi-a-GCST90016976	TRUE	reported	igd	20.4737
	5	172758774	0.0819131	0.018185	9.2289e-06	14306	ebi-a-GCST90016976	rs6881988	C	G	0.5557	|| id:ebi-a-GCST90016976	TRUE	reported	igd	20.2899
	14	76403542	0.0951085	0.0212799	9.29458e-06	14306	ebi-a-GCST90016976	rs7400877	C	T	0.7495	|| id:ebi-a-GCST90016976	TRUE	reported	igd	19.9756
	19	47985753	0.194561	0.0347932	4.25608e-08	14306	ebi-a-GCST90016976	rs830151	G	A	0.0666	|| id:ebi-a-GCST90016976	TRUE	reported	igd	31.2696
	2	19885907	0.0892075	0.0195401	5.94799e-06	14306	ebi-a-GCST90016976	rs9973954	A	G	0.3062	|| id:ebi-a-GCST90016976	TRUE	reported	igd	20.8425
	chr.exposure	pos.exposure	beta.exposure	se.exposure	pval.exposure	samplesize.exposure	id.exposure	SNP	effect_allele.exposure	other_allele.exposure	eaf.exposure	exposure	mr_keep.exposure	pval_origin.exposure	data_source.exposure	F Value
	1	240118443	0.140717	0.0304142	2.79892e-06	14306	ebi-a-GCST90016977	rs12404911	C	T	0.17	|| id:ebi-a-GCST90016977	TRUE	reported	igd	21.4062
genus Catenibacterium id.2153	6	159485742	0.135254	0.0286209	3.62485e-06	14306	ebi-a-GCST90016977	rs212393	A	G	0.6899	|| id:ebi-a-GCST90016977	TRUE	reported	igd	22.3323
	7	57364320	0.129726	0.0284563	4.29368e-06	14306	ebi-a-GCST90016977	rs73128290	A	G	0.2634	|| id:ebi-a-GCST90016977	TRUE	reported	igd	20.7825
	4	122282768	0.161826	0.0353447	3.62677e-06	14306	ebi-a-GCST90016977	rs77285108	A	G	0.8539	|| id:ebi-a-GCST90016977	TRUE	reported	igd	20.9627
	6	105089665	0.11411	0.0251099	5.60725e-06	14306	ebi-a-GCST90016977	rs7742829	C	T	0.4195	|| id:ebi-a-GCST90016977	TRUE	reported	igd	20.6518
	chr.exposure	pos.exposure	beta.exposure	se.exposure	pval.exposure	samplesize.exposure	id.exposure	SNP	effect_allele.exposure	other_allele.exposure	eaf.exposure	exposure	mr_keep.exposure	pval_origin.exposure	data_source.exposure	F Value
	4	156131004	0.0551969	0.0122069	6.50744e-06	14306	ebi-a-GCST90016978	rs10461257	G	A	0.7147	|| id:ebi-a-GCST90016978	TRUE	reported	igd	20.4465
	18	67555560	0.0904325	0.0204253	3.34033e-06	14306	ebi-a-GCST90016978	rs17081797	G	A	0.9314	|| id:ebi-a-GCST90016978	TRUE	reported	igd	19.6025
	19	35883736	0.049815	0.0110787	7.13181e-06	14306	ebi-a-GCST90016978	rs60954665	T	G	0.5099	|| id:ebi-a-GCST90016978	TRUE	reported	igd	20.2182
	19	49279227	0.0828853	0.0179623	5.66709e-06	14306	ebi-a-GCST90016978	rs62132810	G	A	0.8917	|| id:ebi-a-GCST90016978	TRUE	reported	igd	21.2927
	2	230943099	0.0958394	0.0214723	8.74017e-06	14306	ebi-a-GCST90016978	rs62190261	A	C	0.0905	|| id:ebi-a-GCST90016978	TRUE	reported	igd	19.9219
genus Christensenellaceae R 7group id.11283	7	118096925	0.114108	0.0251983	3.25364e-06	14306	ebi-a-GCST90016978	rs62467127	C	T	0.0447	|| id:ebi-a-GCST90016978	TRUE	reported	igd	20.5064
	18	1779609	0.0862164	0.0194354	8.45766e-06	14306	ebi-a-GCST90016978	rs73952017	T	C	0.9125	|| id:ebi-a-GCST90016978	TRUE	reported	igd	19.6785
	10	126448374	0.124992	0.0274797	5.60673e-06	14306	ebi-a-GCST90016978	rs78521377	C	T	0.0527	|| id:ebi-a-GCST90016978	TRUE	reported	igd	20.689
	5	29352420	0.121547	0.0270977	9.41803e-06	14306	ebi-a-GCST90016978	rs79150079	C	A	0.0716	|| id:ebi-a-GCST90016978	TRUE	reported	igd	20.1198
	9	83043376	0.0514099	0.011136	3.96862e-06	14306	ebi-a-GCST90016978	rs892686	A	G	0.4513	|| id:ebi-a-GCST90016978	TRUE	reported	igd	21.3125
	19	34076956	0.0580248	0.0117185	7.00697e-07	14306	ebi-a-GCST90016978	rs999354	T	A	0.325	|| id:ebi-a-GCST90016978	TRUE	reported	igd	24.5179
	chr.exposure	pos.exposure	beta.exposure	se.exposure	pval.exposure	samplesize.exposure	id.exposure	SNP	effect_allele.exposure	other_allele.exposure	eaf.exposure	exposure	mr_keep.exposure	pval_origin.exposure	data_source.exposure	F Value
	5	113126539	0.102648	0.0227508	6.99939e-06	14306	ebi-a-GCST90016979	rs10074000	C	T	0.5865	|| id:ebi-a-GCST90016979	TRUE	reported	igd	20.3567
	12	30268485	0.0997048	0.0221926	8.92442e-06	14306	ebi-a-GCST90016979	rs10506058	A	G	0.3966	|| id:ebi-a-GCST90016979	TRUE	reported	igd	20.1844
	18	69274308	0.157938	0.034187	4.0634e-06	14306	ebi-a-GCST90016979	rs1942371	A	G	0.8698	|| id:ebi-a-GCST90016979	TRUE	reported	igd	21.3428
	3	103025517	0.108859	0.023425	3.49406e-06	14306	ebi-a-GCST90016979	rs1948423	A	T	0.6918	|| id:ebi-a-GCST90016979	TRUE	reported	igd	21.5958
genus Clostridium innocuum group id.14397	5	9368158	0.142664	0.0311021	8.61529e-06	14306	ebi-a-GCST90016979	rs40656	C	T	0.1889	|| id:ebi-a-GCST90016979	TRUE	reported	igd	21.0402
	5	95717619	0.180591	0.0409505	7.24453e-06	14306	ebi-a-GCST90016979	rs4869133	A	G	0.9115	|| id:ebi-a-GCST90016979	TRUE	reported	igd	19.4479
	18	6348227	0.14708	0.0320875	5.58509e-06	14306	ebi-a-GCST90016979	rs61267978	T	C	0.1243	|| id:ebi-a-GCST90016979	TRUE	reported	igd	21.0105
	1	8419420	0.160425	0.0360857	8.40601e-06	14306	ebi-a-GCST90016979	rs6577484	G	A	0.1481	|| id:ebi-a-GCST90016979	TRUE	reported	igd	19.764
	5	71186626	0.113424	0.0233137	1.12243e-06	14306	ebi-a-GCST90016979	rs6890185	T	C	0.3111	|| id:ebi-a-GCST90016979	TRUE	reported	igd	23.6694
	6	143718234	0.126746	0.0274657	7.8001e-06	14306	ebi-a-GCST90016979	rs71564433	A	T	0.8211	|| id:ebi-a-GCST90016979	TRUE	reported	igd	21.2955
	15	59704208	0.114993	0.0257186	8.40621e-06	14306	ebi-a-GCST90016979	rs77845139	G	A	0.7048	|| id:ebi-a-GCST90016979	TRUE	reported	igd	19.9916
	chr.exposure	pos.exposure	beta.exposure	se.exposure	pval.exposure	samplesize.exposure	id.exposure	SNP	effect_allele.exposure	other_allele.exposure	eaf.exposure	exposure	mr_keep.exposure	pval_origin.exposure	data_source.exposure	F Value
	1	155676492	0.139061	0.0334454	7.7555e-06	14306	ebi-a-GCST90016980	rs11264403	A	G	0.9602	|| id:ebi-a-GCST90016980	TRUE	reported	igd	17.2877
	5	84997131	0.22736	0.0492575	4.31688e-06	14306	ebi-a-GCST90016980	rs115807074	G	A	0.9503	|| id:ebi-a-GCST90016980	TRUE	reported	igd	21.3051
	1	83252771	0.110967	0.0250498	8.84993e-06	14306	ebi-a-GCST90016980	rs11586026	A	T	0.0636	|| id:ebi-a-GCST90016980	TRUE	reported	igd	19.6236
	12	43485015	0.110021	0.0246032	4.58121e-06	14306	ebi-a-GCST90016980	rs116847295	C	T	0.0755	|| id:ebi-a-GCST90016980	TRUE	reported	igd	19.9971
genus Clostridium sensustricto1 id.1873	9	136710881	0.0810718	0.0180121	4.8217e-06	14306	ebi-a-GCST90016980	rs12341505	G	A	0.1113	|| id:ebi-a-GCST90016980	TRUE	reported	igd	20.2587
	3	111482845	0.0616879	0.0137581	7.49463e-06	14306	ebi-a-GCST90016980	rs12490337	G	C	0.7545	|| id:ebi-a-GCST90016980	TRUE	reported	igd	20.104
	10	43270264	0.184315	0.0392204	2.72038e-06	14306	ebi-a-GCST90016980	rs2795528	A	G	0.9513	|| id:ebi-a-GCST90016980	TRUE	reported	igd	22.085
	1	3041519	0.058139	0.0124492	2.76656e-06	14306	ebi-a-GCST90016980	rs2817172	C	T	0.4125	|| id:ebi-a-GCST90016980	TRUE	reported	igd	21.8098
	6	165722832	0.0783246	0.0169209	2.05069e-06	14306	ebi-a-GCST90016980	rs550843	C	T	0.8509	|| id:ebi-a-GCST90016980	TRUE	reported	igd	21.4264
	chr.exposure	pos.exposure	beta.exposure	se.exposure	pval.exposure	samplesize.exposure	id.exposure	SNP	effect_allele.exposure	other_allele.exposure	eaf.exposure	exposure	mr_keep.exposure	pval_origin.exposure	data_source.exposure	F Value
	11	107123199	0.0537401	0.0118848	6.52139e-06	14306	ebi-a-GCST90016981	rs10890671	C	T	0.4732	|| id:ebi-a-GCST90016981	TRUE	reported	igd	20.4462
	10	8589813	0.0537947	0.0120548	9.37605e-06	14306	ebi-a-GCST90016981	rs11597285	T	G	0.5755	|| id:ebi-a-GCST90016981	TRUE	reported	igd	19.914
	16	77283458	0.0563759	0.0127019	8.22565e-06	14306	ebi-a-GCST90016981	rs12921100	A	T	0.3171	|| id:ebi-a-GCST90016981	TRUE	reported	igd	19.6992
	19	31760841	0.0722307	0.01616	6.78172e-06	14306	ebi-a-GCST90016981	rs1496626	C	T	0.8459	|| id:ebi-a-GCST90016981	TRUE	reported	igd	19.9784
genus Collinsella id.815	19	56526640	0.104264	0.0235841	7.09872e-06	14306	ebi-a-GCST90016981	rs149807560	A	C	0.9105	|| id:ebi-a-GCST90016981	TRUE	reported	igd	19.5448
	21	29355467	0.0786551	0.0168217	2.42477e-06	14306	ebi-a-GCST90016981	rs2103510	G	A	0.1312	|| id:ebi-a-GCST90016981	TRUE	reported	igd	21.8632
	17	47529492	0.0567751	0.011945	2.22039e-06	14306	ebi-a-GCST90016981	rs2671662	G	C	0.5318	|| id:ebi-a-GCST90016981	TRUE	reported	igd	22.5914
	15	50026113	0.0668866	0.0149773	9.14724e-06	14306	ebi-a-GCST90016981	rs59414781	C	G	0.1799	|| id:ebi-a-GCST90016981	TRUE	reported	igd	19.944
	7	24465024	0.0540309	0.0120324	6.7825e-06	14306	ebi-a-GCST90016981	rs62448871	A	C	0.5388	|| id:ebi-a-GCST90016981	TRUE	reported	igd	20.1641
	2	195739311	0.0930178	0.0202658	1.71581e-06	14306	ebi-a-GCST90016981	rs73052258	G	A	0.0964	|| id:ebi-a-GCST90016981	TRUE	reported	igd	21.0671
	4	149818294	0.108908	0.0240522	6.1355e-06	14306	ebi-a-GCST90016981	rs75672793	G	A	0.9294	|| id:ebi-a-GCST90016981	TRUE	reported	igd	20.5026
	13	68610061	0.09597	0.0197312	8.79427e-07	14306	ebi-a-GCST90016981	rs9541268	C	A	0.0964	|| id:ebi-a-GCST90016981	TRUE	reported	igd	23.6572
	chr.exposure	pos.exposure	beta.exposure	se.exposure	pval.exposure	samplesize.exposure	id.exposure	SNP	effect_allele.exposure	other_allele.exposure	eaf.exposure	exposure	mr_keep.exposure	pval_origin.exposure	data_source.exposure	F Value
	12	98289796	0.103931	0.0226826	5.71189e-06	14306	ebi-a-GCST90016982	rs11532348	T	C	0.8171	|| id:ebi-a-GCST90016982	TRUE	reported	igd	20.9945
	9	137784868	0.100827	0.0220366	6.10183e-06	14306	ebi-a-GCST90016982	rs12684609	T	C	0.1978	|| id:ebi-a-GCST90016982	TRUE	reported	igd	20.9346
	2	137223458	0.0921817	0.0209405	8.07644e-06	14306	ebi-a-GCST90016982	rs12996055	A	C	0.1918	|| id:ebi-a-GCST90016982	TRUE	reported	igd	19.3783
	11	103549974	0.253264	0.0540141	3.07249e-06	14306	ebi-a-GCST90016982	rs143662916	C	T	0.0577	|| id:ebi-a-GCST90016982	TRUE	reported	igd	21.9853
genus Coprobacter id.949	20	57574851	0.0781125	0.0171916	6.26297e-06	14306	ebi-a-GCST90016982	rs189356	G	A	0.5219	|| id:ebi-a-GCST90016982	TRUE	reported	igd	20.6447
	6	97234939	0.0887412	0.0188377	2.34882e-06	14306	ebi-a-GCST90016982	rs213863	T	C	0.6909	|| id:ebi-a-GCST90016982	TRUE	reported	igd	22.1919
	4	96389240	0.110695	0.0251199	9.55675e-06	14306	ebi-a-GCST90016982	rs28402691	T	C	0.167	|| id:ebi-a-GCST90016982	TRUE	reported	igd	19.4187
	1	88233128	0.129218	0.0264518	1.00907e-06	14306	ebi-a-GCST90016982	rs305411	A	G	0.1352	|| id:ebi-a-GCST90016982	TRUE	reported	igd	23.8636
	3	46483717	0.0912179	0.019569	2.88975e-06	14306	ebi-a-GCST90016982	rs3828477	T	G	0.7187	|| id:ebi-a-GCST90016982	TRUE	reported	igd	21.7282
	15	91166608	0.0899597	0.020001	5.51049e-06	14306	ebi-a-GCST90016982	rs5011652	G	C	0.2455	|| id:ebi-a-GCST90016982	TRUE	reported	igd	20.2298
	4	34852443	0.193354	0.0413815	2.73691e-06	14306	ebi-a-GCST90016982	rs55672356	A	T	0.9473	|| id:ebi-a-GCST90016982	TRUE	reported	igd	21.832
	6	4714797	0.147365	0.0319978	4.75762e-06	14306	ebi-a-GCST90016982	rs72821405	C	T	0.9115	|| id:ebi-a-GCST90016982	TRUE	reported	igd	21.2104
	2	32242452	0.125703	0.0276296	5.76328e-06	14306	ebi-a-GCST90016982	rs74919520	G	A	0.1282	|| id:ebi-a-GCST90016982	TRUE	reported	igd	20.6987
	4	3852385	0.21591	0.0493019	9.12599e-06	14306	ebi-a-GCST90016982	rs76001613	C	G	0.0696	|| id:ebi-a-GCST90016982	TRUE	reported	igd	19.1787
	chr.exposure	pos.exposure	beta.exposure	se.exposure	pval.exposure	samplesize.exposure	id.exposure	SNP	effect_allele.exposure	other_allele.exposure	eaf.exposure	exposure	mr_keep.exposure	pval_origin.exposure	data_source.exposure	F Value
	1	30400301	0.0580232	0.0122722	1.95916e-06	14306	ebi-a-GCST90016983	rs1010560	C	A	0.2962	|| id:ebi-a-GCST90016983	TRUE	reported	igd	22.3542
	11	124554061	0.0903299	0.0197212	4.9153e-06	14306	ebi-a-GCST90016983	rs12794898	G	T	0.0944	|| id:ebi-a-GCST90016983	TRUE	reported	igd	20.9796
	14	29898456	0.0521782	0.0118051	8.00774e-06	14306	ebi-a-GCST90016983	rs12886051	C	G	0.6571	|| id:ebi-a-GCST90016983	TRUE	reported	igd	19.5361
	2	22079770	0.0499197	0.0113558	8.95282e-06	14306	ebi-a-GCST90016983	rs1519491	T	C	0.4085	|| id:ebi-a-GCST90016983	TRUE	reported	igd	19.3245
	6	72529277	0.0510343	0.0109535	3.32859e-06	14306	ebi-a-GCST90016983	rs1576241	G	A	0.5606	|| id:ebi-a-GCST90016983	TRUE	reported	igd	21.7079
genus Coprococcus1 id.11301	19	2600717	0.0561173	0.0126824	7.65332e-06	14306	ebi-a-GCST90016983	rs2907920	A	G	0.2903	|| id:ebi-a-GCST90016983	TRUE	reported	igd	19.579
	20	4319420	0.0585649	0.0109914	1.1397e-07	14306	ebi-a-GCST90016983	rs4277593	A	G	0.5169	|| id:ebi-a-GCST90016983	TRUE	reported	igd	28.3902
	4	174468316	0.08963	0.0186508	1.57195e-06	14306	ebi-a-GCST90016983	rs56405618	G	A	0.8887	|| id:ebi-a-GCST90016983	TRUE	reported	igd	23.0947
	11	134622282	0.167591	0.0355224	1.97916e-06	14306	ebi-a-GCST90016983	rs73031725	T	C	0.0606	|| id:ebi-a-GCST90016983	TRUE	reported	igd	22.2585
	3	165693143	0.0573137	0.0127573	8.5686e-06	14306	ebi-a-GCST90016983	rs73167075	T	C	0.2396	|| id:ebi-a-GCST90016983	TRUE	reported	igd	20.1836
	1	95424321	0.0718988	0.0144651	1.0329e-06	14306	ebi-a-GCST90016983	rs74101919	C	T	0.8131	|| id:ebi-a-GCST90016983	TRUE	reported	igd	24.7059
	7	132556835	0.0518543	0.0113136	4.55229e-06	14306	ebi-a-GCST90016983	rs7784490	G	C	0.6113	|| id:ebi-a-GCST90016983	TRUE	reported	igd	21.0072
	10	15913820	0.205899	0.0460018	8.61847e-06	14306	ebi-a-GCST90016983	rs946513	C	T	0.0547	|| id:ebi-a-GCST90016983	TRUE	reported	igd	20.0336
	chr.exposure	pos.exposure	beta.exposure	se.exposure	pval.exposure	samplesize.exposure	id.exposure	SNP	effect_allele.exposure	other_allele.exposure	eaf.exposure	exposure	mr_keep.exposure	pval_origin.exposure	data_source.exposure	F Value
	9	8786663	0.11381	0.0232806	1.44534e-06	14306	ebi-a-GCST90016986	rs112893842	T	C	0.0974	|| id:ebi-a-GCST90016986	TRUE	reported	igd	23.8986
	1	118723685	0.0805036	0.0167257	1.56776e-06	14306	ebi-a-GCST90016986	rs1582238	T	C	0.3718	|| id:ebi-a-GCST90016986	TRUE	reported	igd	23.1666
	7	79734541	0.106503	0.0238473	6.62811e-06	14306	ebi-a-GCST90016986	rs28696126	T	A	0.8082	|| id:ebi-a-GCST90016986	TRUE	reported	igd	19.9455
	4	120741726	0.0817755	0.0181686	6.82889e-06	14306	ebi-a-GCST90016986	rs2892880	G	A	0.2604	|| id:ebi-a-GCST90016986	TRUE	reported	igd	20.2583
genus Defluviitaleaceae UCG011 id.11287	10	66407366	0.0715978	0.0156309	4.83237e-06	14306	ebi-a-GCST90016986	rs4344384	G	T	0.4742	|| id:ebi-a-GCST90016986	TRUE	reported	igd	20.9813
	3	72207794	0.0977912	0.0197263	9.59555e-07	14306	ebi-a-GCST90016986	rs4677103	A	G	0.171	|| id:ebi-a-GCST90016986	TRUE	reported	igd	24.5758
	21	41811003	0.174369	0.0362226	2.15293e-06	14306	ebi-a-GCST90016986	rs55658617	T	C	0.0696	|| id:ebi-a-GCST90016986	TRUE	reported	igd	23.1728
	4	147414743	0.147383	0.0293796	4.33112e-07	14306	ebi-a-GCST90016986	rs72731813	T	C	0.9185	|| id:ebi-a-GCST90016986	TRUE	reported	igd	25.1654
	22	24804081	0.142939	0.0299793	2.52046e-06	14306	ebi-a-GCST90016986	rs9608282	T	G	0.0656	|| id:ebi-a-GCST90016986	TRUE	reported	igd	22.7331
	1	85205632	0.13834	0.029554	3.51925e-06	14306	ebi-a-GCST90016986	rs9725395	G	A	0.9125	|| id:ebi-a-GCST90016986	TRUE	reported	igd	21.911
	chr.exposure	pos.exposure	beta.exposure	se.exposure	pval.exposure	samplesize.exposure	id.exposure	SNP	effect_allele.exposure	other_allele.exposure	eaf.exposure	exposure	mr_keep.exposure	pval_origin.exposure	data_source.exposure	F Value
	14	97116904	0.0691756	0.0147285	2.70302e-06	14306	ebi-a-GCST90016987	rs11160353	A	T	0.492	|| id:ebi-a-GCST90016987	TRUE	reported	igd	22.0592
	1	68664315	0.127185	0.0281887	6.54757e-06	14306	ebi-a-GCST90016987	rs12031543	C	T	0.9245	|| id:ebi-a-GCST90016987	TRUE	reported	igd	20.3574
	3	67478973	0.119141	0.0250891	3.78669e-06	14306	ebi-a-GCST90016987	rs13066142	G	A	0.0934	|| id:ebi-a-GCST90016987	TRUE	reported	igd	22.5503
genus Desulfovibrio id.3173	2	198089911	0.109402	0.0226964	1.79449e-06	14306	ebi-a-GCST90016987	rs16863365	A	G	0.1173	|| id:ebi-a-GCST90016987	TRUE	reported	igd	23.2347
	10	130170270	0.0654931	0.0148681	9.14282e-06	14306	ebi-a-GCST90016987	rs2032031	G	A	0.5268	|| id:ebi-a-GCST90016987	TRUE	reported	igd	19.4035
	5	52633741	0.0854927	0.0172749	8.5487e-07	14306	ebi-a-GCST90016987	rs2456226	A	C	0.7107	|| id:ebi-a-GCST90016987	TRUE	reported	igd	24.4922
	13	64264446	0.154496	0.0339396	6.65426e-06	14306	ebi-a-GCST90016987	rs2590913	G	A	0.0726	|| id:ebi-a-GCST90016987	TRUE	reported	igd	20.7215
	8	105462047	0.0811971	0.0174234	2.42438e-06	14306	ebi-a-GCST90016987	rs2853179	C	T	0.2485	|| id:ebi-a-GCST90016987	TRUE	reported	igd	21.7178
	18	13447995	0.212582	0.0470044	5.64313e-06	14306	ebi-a-GCST90016987	rs4797774	G	A	0.0686	|| id:ebi-a-GCST90016987	TRUE	reported	igd	20.4539
	5	139410687	0.0770979	0.0169735	4.93856e-06	14306	ebi-a-GCST90016987	rs6580353	T	C	0.2604	|| id:ebi-a-GCST90016987	TRUE	reported	igd	20.632
	8	57972916	0.106594	0.0239337	8.29755e-06	14306	ebi-a-GCST90016987	rs72647089	G	T	0.8936	|| id:ebi-a-GCST90016987	TRUE	reported	igd	19.8356
	chr.exposure	pos.exposure	beta.exposure	se.exposure	pval.exposure	samplesize.exposure	id.exposure	SNP	effect_allele.exposure	other_allele.exposure	eaf.exposure	exposure	mr_keep.exposure	pval_origin.exposure	data_source.exposure	F Value
	14	102458052	0.113054	0.0261933	7.88116e-06	14306	ebi-a-GCST90016988	rs10138457	C	T	0.9284	|| id:ebi-a-GCST90016988	TRUE	reported	igd	18.6291
	4	23294359	0.0773514	0.0170915	7.37055e-06	14306	ebi-a-GCST90016988	rs10938938	A	G	0.8062	|| id:ebi-a-GCST90016988	TRUE	reported	igd	20.4822
	15	32955095	0.0662403	0.0146315	5.91412e-06	14306	ebi-a-GCST90016988	rs11071887	T	C	0.2634	|| id:ebi-a-GCST90016988	TRUE	reported	igd	20.4959
	8	138295725	0.0655301	0.013186	5.50744e-07	14306	ebi-a-GCST90016988	rs11166701	A	G	0.4841	|| id:ebi-a-GCST90016988	TRUE	reported	igd	24.6976
	16	9336862	0.0865932	0.0193719	8.07904e-06	14306	ebi-a-GCST90016988	rs2314294	T	C	0.1183	|| id:ebi-a-GCST90016988	TRUE	reported	igd	19.9813
genus Dialister id.2183	7	150890034	0.0647132	0.0143314	5.93267e-06	14306	ebi-a-GCST90016988	rs2435610	A	C	0.2604	|| id:ebi-a-GCST90016988	TRUE	reported	igd	20.3896
	10	23199653	0.0668509	0.0147685	5.83727e-06	14306	ebi-a-GCST90016988	rs4747450	C	A	0.2664	|| id:ebi-a-GCST90016988	TRUE	reported	igd	20.49
	11	92267129	0.0596297	0.0130052	4.8568e-06	14306	ebi-a-GCST90016988	rs4753063	A	G	0.5586	|| id:ebi-a-GCST90016988	TRUE	reported	igd	21.0228
	11	10967286	0.076227	0.0170411	5.1363e-06	14306	ebi-a-GCST90016988	rs517089	T	A	0.169	|| id:ebi-a-GCST90016988	TRUE	reported	igd	20.0089
	1	172809633	0.0727223	0.016451	9.46085e-06	14306	ebi-a-GCST90016988	rs75416973	A	G	0.2256	|| id:ebi-a-GCST90016988	TRUE	reported	igd	19.5412
	3	45809449	0.0601454	0.0135366	9.60771e-06	14306	ebi-a-GCST90016988	rs764177	A	C	0.662	|| id:ebi-a-GCST90016988	TRUE	reported	igd	19.7417
	9	25447080	0.161296	0.0364332	8.19219e-06	14306	ebi-a-GCST90016988	rs76680460	A	G	0.9523	|| id:ebi-a-GCST90016988	TRUE	reported	igd	19.5998
	chr.exposure	pos.exposure	beta.exposure	se.exposure	pval.exposure	samplesize.exposure	id.exposure	SNP	effect_allele.exposure	other_allele.exposure	eaf.exposure	exposure	mr_keep.exposure	pval_origin.exposure	data_source.exposure	F Value
	16	81803497	0.0488254	0.0109063	7.05781e-06	14306	ebi-a-GCST90016989	rs11150408	T	G	0.4453	|| id:ebi-a-GCST90016989	TRUE	reported	igd	20.0418
	6	116078810	0.0881722	0.0193683	5.33126e-06	14306	ebi-a-GCST90016989	rs12216169	T	A	0.0835	|| id:ebi-a-GCST90016989	TRUE	reported	igd	20.7243
	7	154978183	0.055544	0.0125223	9.15145e-06	14306	ebi-a-GCST90016989	rs12537781	C	T	0.7704	|| id:ebi-a-GCST90016989	TRUE	reported	igd	19.6746
	8	127905865	0.0715309	0.0150878	2.25284e-06	14306	ebi-a-GCST90016989	rs13279148	G	A	0.166	|| id:ebi-a-GCST90016989	TRUE	reported	igd	22.4769
	4	60992340	0.0697217	0.0150285	4.56688e-06	14306	ebi-a-GCST90016989	rs1899291	C	T	0.1282	|| id:ebi-a-GCST90016989	TRUE	reported	igd	21.5231
genus Dorea id.1997	6	74605806	0.0516127	0.0112852	5.28701e-06	14306	ebi-a-GCST90016989	rs3005511	A	G	0.336	|| id:ebi-a-GCST90016989	TRUE	reported	igd	20.9168
	3	6826520	0.0497368	0.0112621	8.80055e-06	14306	ebi-a-GCST90016989	rs345219	G	T	0.6243	|| id:ebi-a-GCST90016989	TRUE	reported	igd	19.5037
	11	8729057	0.163846	0.036608	7.68051e-06	14306	ebi-a-GCST90016989	rs3752849	G	A	0.0328	|| id:ebi-a-GCST90016989	TRUE	reported	igd	20.0318
	17	70733523	0.0574165	0.0122472	4.00691e-06	14306	ebi-a-GCST90016989	rs4793307	C	T	0.2455	|| id:ebi-a-GCST90016989	TRUE	reported	igd	21.9786
	8	15768657	0.0974091	0.0194379	7.46603e-07	14306	ebi-a-GCST90016989	rs62503162	G	A	0.9125	|| id:ebi-a-GCST90016989	TRUE	reported	igd	25.1131
	9	106815466	0.0634136	0.0142227	5.77511e-06	14306	ebi-a-GCST90016989	rs62583469	A	T	0.8012	|| id:ebi-a-GCST90016989	TRUE	reported	igd	19.8793
	6	25078050	0.13745	0.0299983	3.16738e-06	14306	ebi-a-GCST90016989	rs73729431	T	C	0.9394	|| id:ebi-a-GCST90016989	TRUE	reported	igd	20.994
	chr.exposure	pos.exposure	beta.exposure	se.exposure	pval.exposure	samplesize.exposure	id.exposure	SNP	effect_allele.exposure	other_allele.exposure	eaf.exposure	exposure	mr_keep.exposure	pval_origin.exposure	data_source.exposure	F Value
	1	9136139	0.188618	0.0403613	3.34649e-06	14306	ebi-a-GCST90016990	rs112205261	C	T	0.9423	|| id:ebi-a-GCST90016990	TRUE	reported	igd	21.8392
	3	20807454	0.121331	0.0272024	7.61921e-06	14306	ebi-a-GCST90016990	rs13070736	C	A	0.8429	|| id:ebi-a-GCST90016990	TRUE	reported	igd	19.8943
	11	102461599	0.0907728	0.0198096	5.2313e-06	14306	ebi-a-GCST90016990	rs1784446	G	A	0.4423	|| id:ebi-a-GCST90016990	TRUE	reported	igd	20.9971
	21	29778032	0.102572	0.0221108	3.88893e-06	14306	ebi-a-GCST90016990	rs2223081	G	A	0.2922	|| id:ebi-a-GCST90016990	TRUE	reported	igd	21.5203
	7	38335954	0.0980582	0.0197653	7.36207e-07	14306	ebi-a-GCST90016990	rs2240838	A	G	0.502	|| id:ebi-a-GCST90016990	TRUE	reported	igd	24.6128
genus Eggerthella id.819	4	70483957	0.093486	0.0210208	9.02714e-06	14306	ebi-a-GCST90016990	rs2877457	A	G	0.1322	|| id:ebi-a-GCST90016990	TRUE	reported	igd	19.7786
	2	45453805	0.107774	0.0236527	4.1759e-06	14306	ebi-a-GCST90016990	rs3851328	G	T	0.7336	|| id:ebi-a-GCST90016990	TRUE	reported	igd	20.7619
	17	17098213	0.110522	0.0247653	5.71465e-06	14306	ebi-a-GCST90016990	rs4985746	G	A	0.1789	|| id:ebi-a-GCST90016990	TRUE	reported	igd	19.9164
	2	141337454	0.0879736	0.0197127	8.37124e-06	14306	ebi-a-GCST90016990	rs6430926	C	T	0.5139	|| id:ebi-a-GCST90016990	TRUE	reported	igd	19.9165
	15	65691324	0.108495	0.0245457	8.94211e-06	14306	ebi-a-GCST90016990	rs67490567	T	C	0.1978	|| id:ebi-a-GCST90016990	TRUE	reported	igd	19.5375
	20	55647869	0.175349	0.0378576	4.8257e-06	14306	ebi-a-GCST90016990	rs76663501	C	T	0.0815	|| id:ebi-a-GCST90016990	TRUE	reported	igd	21.4536
	chr.exposure	pos.exposure	beta.exposure	se.exposure	pval.exposure	samplesize.exposure	id.exposure	SNP	effect_allele.exposure	other_allele.exposure	eaf.exposure	exposure	mr_keep.exposure	pval_origin.exposure	data_source.exposure	F Value
	11	24001840	0.129006	0.0284844	4.9187e-06	14306	ebi-a-GCST90016991	rs11027642	C	T	0.1243	|| id:ebi-a-GCST90016991	TRUE	reported	igd	20.5119
	17	53367641	0.100627	0.022546	7.34852e-06	14306	ebi-a-GCST90016991	rs11079158	T	C	0.2197	|| id:ebi-a-GCST90016991	TRUE	reported	igd	19.92
	4	189060431	0.0978125	0.0216636	8.21826e-06	14306	ebi-a-GCST90016991	rs11938607	T	C	0.2634	|| id:ebi-a-GCST90016991	TRUE	reported	igd	20.3858
	10	109417101	0.0952742	0.0211569	8.85116e-06	14306	ebi-a-GCST90016991	rs12257723	C	A	0.661	|| id:ebi-a-GCST90016991	TRUE	reported	igd	20.279
genus Eisenbergiella id.11304	11	124764527	0.121065	0.0251658	1.65002e-06	14306	ebi-a-GCST90016991	rs12278566	A	T	0.825	|| id:ebi-a-GCST90016991	TRUE	reported	igd	23.1428
	2	19973210	0.0893384	0.0199069	9.84419e-06	14306	ebi-a-GCST90016991	rs12710729	C	A	0.3708	|| id:ebi-a-GCST90016991	TRUE	reported	igd	20.1404
	8	55330814	0.137001	0.0302124	7.7464e-06	14306	ebi-a-GCST90016991	rs13258851	A	G	0.0855	|| id:ebi-a-GCST90016991	TRUE	reported	igd	20.5626
	15	53375201	0.091546	0.0195787	3.22887e-06	14306	ebi-a-GCST90016991	rs1508033	A	C	0.3499	|| id:ebi-a-GCST90016991	TRUE	reported	igd	21.8631
	3	111419486	0.120965	0.0263054	5.26842e-06	14306	ebi-a-GCST90016991	rs1553971	T	G	0.161	|| id:ebi-a-GCST90016991	TRUE	reported	igd	21.1461
	15	36178565	0.107319	0.022515	2.23748e-06	14306	ebi-a-GCST90016991	rs2683098	C	T	0.2237	|| id:ebi-a-GCST90016991	TRUE	reported	igd	22.7201
	8	50822676	0.106447	0.0224159	2.71688e-06	14306	ebi-a-GCST90016991	rs3812426	G	A	0.2078	|| id:ebi-a-GCST90016991	TRUE	reported	igd	22.5504
	21	21610254	0.0939071	0.0201104	4.16217e-06	14306	ebi-a-GCST90016991	rs4462860	G	A	0.3439	|| id:ebi-a-GCST90016991	TRUE	reported	igd	21.805
	chr.exposure	pos.exposure	beta.exposure	se.exposure	pval.exposure	samplesize.exposure	id.exposure	SNP	effect_allele.exposure	other_allele.exposure	eaf.exposure	exposure	mr_keep.exposure	pval_origin.exposure	data_source.exposure	F Value
	8	113109756	0.132323	0.0293688	6.40575e-06	14306	ebi-a-GCST90016992	rs10098492	T	C	0.0905	|| id:ebi-a-GCST90016992	TRUE	reported	igd	20.3001
	4	127336602	0.0966008	0.0162677	3.05647e-09	14306	ebi-a-GCST90016992	rs11098863	A	T	0.5179	|| id:ebi-a-GCST90016992	TRUE	reported	igd	35.2622
	2	19611953	0.182308	0.0382298	2.1734e-06	14306	ebi-a-GCST90016992	rs114731706	T	G	0.0835	|| id:ebi-a-GCST90016992	TRUE	reported	igd	22.7409
genus Enterorhabdus id.820	7	89709883	0.0843291	0.0189864	8.89857e-06	14306	ebi-a-GCST90016992	rs2051957	C	T	0.2346	|| id:ebi-a-GCST90016992	TRUE	reported	igd	19.7274
	11	62174193	0.0980897	0.0208995	2.94042e-06	14306	ebi-a-GCST90016992	rs3017103	A	G	0.1899	|| id:ebi-a-GCST90016992	TRUE	reported	igd	22.028
	12	69515102	0.26199	0.055123	4.8492e-06	14306	ebi-a-GCST90016992	rs73331712	T	C	0.0427	|| id:ebi-a-GCST90016992	TRUE	reported	igd	22.5894
	2	236439879	0.132988	0.0298306	5.88044e-06	14306	ebi-a-GCST90016992	rs77655283	G	A	0.0686	|| id:ebi-a-GCST90016992	TRUE	reported	igd	19.8747
	10	20280612	0.0860019	0.0169148	5.23854e-07	14306	ebi-a-GCST90016992	rs7923280	A	T	0.3946	|| id:ebi-a-GCST90016992	TRUE	reported	igd	25.8513
	6	37567189	0.0755513	0.0166263	5.69626e-06	14306	ebi-a-GCST90016992	rs9470637	T	A	0.5974	|| id:ebi-a-GCST90016992	TRUE	reported	igd	20.6487
	chr.exposure	pos.exposure	beta.exposure	se.exposure	pval.exposure	samplesize.exposure	id.exposure	SNP	effect_allele.exposure	other_allele.exposure	eaf.exposure	exposure	mr_keep.exposure	pval_origin.exposure	data_source.exposure	F Value
	2	34595533	0.0684526	0.0152443	6.85299e-06	14306	ebi-a-GCST90016993	rs1434153	A	G	0.6789	|| id:ebi-a-GCST90016993	TRUE	reported	igd	20.1635
	10	36394609	0.0968026	0.0217883	6.0431e-06	14306	ebi-a-GCST90016993	rs16936671	T	C	0.8638	|| id:ebi-a-GCST90016993	TRUE	reported	igd	19.7391
	5	77815056	0.0662914	0.0144203	4.58606e-06	14306	ebi-a-GCST90016993	rs17804233	C	T	0.5179	|| id:ebi-a-GCST90016993	TRUE	reported	igd	21.1332
	11	36871523	0.0641339	0.0144295	8.79468e-06	14306	ebi-a-GCST90016993	rs2901723	C	A	0.503	|| id:ebi-a-GCST90016993	TRUE	reported	igd	19.7548
	5	34892042	0.0740482	0.0158891	3.74938e-06	14306	ebi-a-GCST90016993	rs340991	G	A	0.7018	|| id:ebi-a-GCST90016993	TRUE	reported	igd	21.7185
genus Erysipelatoclostridium id.11381	17	71411325	0.0875551	0.0195556	6.12703e-06	14306	ebi-a-GCST90016993	rs34528142	G	C	0.829	|| id:ebi-a-GCST90016993	TRUE	reported	igd	20.0457
	6	24292185	0.14147	0.0336352	9.85281e-06	14306	ebi-a-GCST90016993	rs3804326	A	G	0.0676	|| id:ebi-a-GCST90016993	TRUE	reported	igd	17.6905
	19	55857777	0.0687134	0.0151835	7.66161e-06	14306	ebi-a-GCST90016993	rs45480394	G	T	0.6382	|| id:ebi-a-GCST90016993	TRUE	reported	igd	20.4804
	4	25446787	0.0810636	0.0163308	7.59347e-07	14306	ebi-a-GCST90016993	rs4697572	G	A	0.7545	|| id:ebi-a-GCST90016993	TRUE	reported	igd	24.6398
	11	121876913	0.111157	0.0234426	2.16118e-06	14306	ebi-a-GCST90016993	rs58236560	T	G	0.8628	|| id:ebi-a-GCST90016993	TRUE	reported	igd	22.4834
	1	167818597	0.142548	0.0320688	9.09411e-06	14306	ebi-a-GCST90016993	rs61806970	C	T	0.0646	|| id:ebi-a-GCST90016993	TRUE	reported	igd	19.7586
	9	90586043	0.0668051	0.0143224	3.68154e-06	14306	ebi-a-GCST90016993	rs622418	G	A	0.4891	|| id:ebi-a-GCST90016993	TRUE	reported	igd	21.7564
	8	38780606	0.067015	0.0143201	3.01544e-06	14306	ebi-a-GCST90016993	rs6474512	A	C	0.4513	|| id:ebi-a-GCST90016993	TRUE	reported	igd	21.9004
	1	42333631	0.143381	0.0281514	6.33126e-07	14306	ebi-a-GCST90016993	rs710230	T	C	0.0865	|| id:ebi-a-GCST90016993	TRUE	reported	igd	25.9408
	17	10177708	0.0839861	0.0142741	4.30953e-09	14306	ebi-a-GCST90016993	rs7221249	A	G	0.5467	|| id:ebi-a-GCST90016993	TRUE	reported	igd	34.6192
	13	46372065	0.0646003	0.0143479	6.39043e-06	14306	ebi-a-GCST90016993	rs9590927	A	G	0.506	|| id:ebi-a-GCST90016993	TRUE	reported	igd	20.2718
genus Erysipelotrichaceae UCG003 id.11384	chr.exposure	pos.exposure	beta.exposure	se.exposure	pval.exposure	samplesize.exposure	id.exposure	SNP	effect_allele.exposure	other_allele.exposure	eaf.exposure	exposure	mr_keep.exposure	pval_origin.exposure	data_source.exposure	F Value
	2	175403951	0.169667	0.0374238	3.57511e-06	14306	ebi-a-GCST90016994	rs75949021	C	T	0.9543	|| id:ebi-a-GCST90016994	TRUE	reported	igd	20.5541
	chr.exposure	pos.exposure	beta.exposure	se.exposure	pval.exposure	samplesize.exposure	id.exposure	SNP	effect_allele.exposure	other_allele.exposure	eaf.exposure	exposure	mr_keep.exposure	pval_origin.exposure	data_source.exposure	F Value
	16	3750623	0.0732963	0.0163589	8.20635e-06	14306	ebi-a-GCST90016995	rs112767262	T	C	0.1958	|| id:ebi-a-GCST90016995	TRUE	reported	igd	20.075
	13	23253392	0.151009	0.0323434	3.3335e-06	14306	ebi-a-GCST90016995	rs113127095	A	G	0.0517	|| id:ebi-a-GCST90016995	TRUE	reported	igd	21.7989
	7	140678199	0.172283	0.038041	5.27716e-06	14306	ebi-a-GCST90016995	rs113513883	A	G	0.0577	|| id:ebi-a-GCST90016995	TRUE	reported	igd	20.5107
	11	134774845	0.0613376	0.0130644	3.03753e-06	14306	ebi-a-GCST90016995	rs1154904	G	A	0.5358	|| id:ebi-a-GCST90016995	TRUE	reported	igd	22.0432
	3	3173016	0.075657	0.0164155	5.87273e-06	14306	ebi-a-GCST90016995	rs11706043	T	A	0.1571	|| id:ebi-a-GCST90016995	TRUE	reported	igd	21.2417
	10	69394914	0.117362	0.0264533	9.65028e-06	14306	ebi-a-GCST90016995	rs117092367	A	T	0.0885	|| id:ebi-a-GCST90016995	TRUE	reported	igd	19.6832
genus Escherichia Shigella id.3504	5	79863544	0.0594401	0.013598	7.99558e-06	14306	ebi-a-GCST90016995	rs118526	A	C	0.6074	|| id:ebi-a-GCST90016995	TRUE	reported	igd	19.1077
	7	31136897	0.115505	0.0237628	1.42479e-06	14306	ebi-a-GCST90016995	rs2267739	G	C	0.0855	|| id:ebi-a-GCST90016995	TRUE	reported	igd	23.6269
	1	48961903	0.100851	0.0222045	8.24499e-06	14306	ebi-a-GCST90016995	rs2798105	G	A	0.8817	|| id:ebi-a-GCST90016995	TRUE	reported	igd	20.629
	16	77711641	0.101976	0.0222883	4.92334e-06	14306	ebi-a-GCST90016995	rs35555519	C	G	0.1143	|| id:ebi-a-GCST90016995	TRUE	reported	igd	20.9335
	7	128054100	0.0609885	0.0135157	7.47309e-06	14306	ebi-a-GCST90016995	rs4731451	A	G	0.6282	|| id:ebi-a-GCST90016995	TRUE	reported	igd	20.3619
	2	236515155	0.0626172	0.0139919	9.70465e-06	14306	ebi-a-GCST90016995	rs57024273	T	C	0.3181	|| id:ebi-a-GCST90016995	TRUE	reported	igd	20.0278
	9	136179347	0.0592004	0.0129486	4.76925e-06	14306	ebi-a-GCST90016995	rs592299	C	T	0.5318	|| id:ebi-a-GCST90016995	TRUE	reported	igd	20.9028
	21	39324484	0.119296	0.024839	2.19392e-06	14306	ebi-a-GCST90016995	rs73208162	G	A	0.9414	|| id:ebi-a-GCST90016995	TRUE	reported	igd	23.0666
	17	14173290	0.136384	0.0302576	5.90391e-06	14306	ebi-a-GCST90016995	rs7502686	C	G	0.9374	|| id:ebi-a-GCST90016995	TRUE	reported	igd	20.3169
	chr.exposure	pos.exposure	beta.exposure	se.exposure	pval.exposure	samplesize.exposure	id.exposure	SNP	effect_allele.exposure	other_allele.exposure	eaf.exposure	exposure	mr_keep.exposure	pval_origin.exposure	data_source.exposure	F Value
	10	94185213	0.170873	0.0362844	2.38035e-06	14306	ebi-a-GCST90016996	rs112617308	C	T	0.9205	|| id:ebi-a-GCST90016996	TRUE	reported	igd	22.1772
	2	218237281	0.101329	0.0227324	9.27043e-06	14306	ebi-a-GCST90016996	rs12151423	A	G	0.4791	|| id:ebi-a-GCST90016996	TRUE	reported	igd	19.869
	4	144665178	0.145997	0.0327192	7.96746e-06	14306	ebi-a-GCST90016996	rs13139592	C	T	0.8777	|| id:ebi-a-GCST90016996	TRUE	reported	igd	19.9105
	14	23060552	0.120888	0.0266264	6.99294e-06	14306	ebi-a-GCST90016996	rs1384962	A	G	0.2107	|| id:ebi-a-GCST90016996	TRUE	reported	igd	20.613
	10	22892667	0.105143	0.022942	4.55806e-06	14306	ebi-a-GCST90016996	rs2913110	C	T	0.3777	|| id:ebi-a-GCST90016996	TRUE	reported	igd	21.0038
genus Eubacterium brachy group id.11296	4	184628931	0.104806	0.0225751	3.73147e-06	14306	ebi-a-GCST90016996	rs4862235	G	A	0.4443	|| id:ebi-a-GCST90016996	TRUE	reported	igd	21.5533
	5	17460096	0.201481	0.043286	3.7812e-06	14306	ebi-a-GCST90016996	rs62348779	C	T	0.9185	|| id:ebi-a-GCST90016996	TRUE	reported	igd	21.6657
	11	80236833	0.108225	0.0240319	7.34345e-06	14306	ebi-a-GCST90016996	rs6591893	G	A	0.3479	|| id:ebi-a-GCST90016996	TRUE	reported	igd	20.2805
	22	48190598	0.111927	0.0251252	7.0283e-06	14306	ebi-a-GCST90016996	rs720439	G	A	0.7485	|| id:ebi-a-GCST90016996	TRUE	reported	igd	19.845
	4	6856564	0.236717	0.0531335	8.1553e-06	14306	ebi-a-GCST90016996	rs73199919	C	T	0.9433	|| id:ebi-a-GCST90016996	TRUE	reported	igd	19.8482
	22	26922534	0.238718	0.0528561	4.98781e-06	14306	ebi-a-GCST90016996	rs9613196	A	T	0.9235	|| id:ebi-a-GCST90016996	TRUE	reported	igd	20.3976
	chr.exposure	pos.exposure	beta.exposure	se.exposure	pval.exposure	samplesize.exposure	id.exposure	SNP	effect_allele.exposure	other_allele.exposure	eaf.exposure	exposure	mr_keep.exposure	pval_origin.exposure	data_source.exposure	F Value
	10	2215931	0.0505823	0.0113455	5.98467e-06	14306	ebi-a-GCST90016997	rs10444197	G	A	0.6322	|| id:ebi-a-GCST90016997	TRUE	reported	igd	19.877
	12	32713919	0.0477832	0.0107833	9.37951e-06	14306	ebi-a-GCST90016997	rs11052069	T	C	0.4344	|| id:ebi-a-GCST90016997	TRUE	reported	igd	19.6357
	1	200638489	0.0783322	0.0174719	2.62198e-06	14306	ebi-a-GCST90016997	rs115325767	G	C	0.0934	|| id:ebi-a-GCST90016997	TRUE	reported	igd	20.1002
	3	113794507	0.0630776	0.0144485	9.26254e-06	14306	ebi-a-GCST90016997	rs11720857	C	T	0.1769	|| id:ebi-a-GCST90016997	TRUE	reported	igd	19.0592
	15	36911598	0.0533159	0.0115935	4.348e-06	14306	ebi-a-GCST90016997	rs12906958	T	C	0.6978	|| id:ebi-a-GCST90016997	TRUE	reported	igd	21.1487
genus Eubacterium coprostanoligenes group id.11375	7	31085162	0.0962228	0.0168388	1.03786e-08	14306	ebi-a-GCST90016997	rs17159861	C	T	0.1332	|| id:ebi-a-GCST90016997	TRUE	reported	igd	32.6538
	10	84506096	0.0538845	0.0121245	9.85644e-06	14306	ebi-a-GCST90016997	rs2644213	G	A	0.2366	|| id:ebi-a-GCST90016997	TRUE	reported	igd	19.7515
	15	86440997	0.0515152	0.0110294	1.98976e-06	14306	ebi-a-GCST90016997	rs4076415	T	G	0.4006	|| id:ebi-a-GCST90016997	TRUE	reported	igd	21.8156
	7	73306506	0.0786783	0.0174038	9.1772e-06	14306	ebi-a-GCST90016997	rs4717831	A	T	0.1193	|| id:ebi-a-GCST90016997	TRUE	reported	igd	20.4372
	15	97869293	0.0769698	0.0172101	7.50205e-06	14306	ebi-a-GCST90016997	rs62024432	T	C	0.8748	|| id:ebi-a-GCST90016997	TRUE	reported	igd	20.002
	3	127139574	0.0521584	0.0112353	4.26108e-06	14306	ebi-a-GCST90016997	rs6762473	C	A	0.3569	|| id:ebi-a-GCST90016997	TRUE	reported	igd	21.5516
	7	33603122	0.0796956	0.0172275	3.66336e-06	14306	ebi-a-GCST90016997	rs73109678	A	G	0.8847	|| id:ebi-a-GCST90016997	TRUE	reported	igd	21.4005
	3	81595477	0.123055	0.0266375	4.78983e-06	14306	ebi-a-GCST90016997	rs76898927	G	A	0.0477	|| id:ebi-a-GCST90016997	TRUE	reported	igd	21.3408
	2	50797401	0.0641017	0.0141153	8.61807e-06	14306	ebi-a-GCST90016997	rs79895140	C	T	0.7833	|| id:ebi-a-GCST90016997	TRUE	reported	igd	20.6233
	7	16380806	0.0828719	0.016431	2.52029e-07	14306	ebi-a-GCST90016997	rs9648214	C	T	0.8817	|| id:ebi-a-GCST90016997	TRUE	reported	igd	25.4382
	chr.exposure	pos.exposure	beta.exposure	se.exposure	pval.exposure	samplesize.exposure	id.exposure	SNP	effect_allele.exposure	other_allele.exposure	eaf.exposure	exposure	mr_keep.exposure	pval_origin.exposure	data_source.exposure	F Value
	4	42836822	0.0877679	0.0197674	5.93636e-06	14306	ebi-a-GCST90016998	rs11730852	C	A	0.1839	|| id:ebi-a-GCST90016998	TRUE	reported	igd	19.7139
	7	51365152	0.0916626	0.0208183	7.11771e-06	14306	ebi-a-GCST90016998	rs12719051	A	G	0.1004	|| id:ebi-a-GCST90016998	TRUE	reported	igd	19.3863
	14	77619186	0.0915271	0.0190611	9.74182e-06	14306	ebi-a-GCST90016998	rs158115	G	C	0.0924	|| id:ebi-a-GCST90016998	TRUE	reported	igd	23.057
	11	31098691	0.0824941	0.0195615	8.39827e-06	14306	ebi-a-GCST90016998	rs182318	A	G	0.9225	|| id:ebi-a-GCST90016998	TRUE	reported	igd	17.7845
	13	107563458	0.0888825	0.0198479	5.29724e-06	14306	ebi-a-GCST90016998	rs2200429	G	A	0.9264	|| id:ebi-a-GCST90016998	TRUE	reported	igd	20.0541
genus Eubacterium eligens group id.14372	10	83092007	0.0563756	0.0120127	2.26757e-06	14306	ebi-a-GCST90016998	rs265534	G	T	0.5447	|| id:ebi-a-GCST90016998	TRUE	reported	igd	22.0242
	16	81820486	0.0670205	0.0128122	2.83851e-07	14306	ebi-a-GCST90016998	rs4583233	A	C	0.334	|| id:ebi-a-GCST90016998	TRUE	reported	igd	27.3633
	2	110260993	0.123093	0.0282743	9.14282e-06	14306	ebi-a-GCST90016998	rs56080211	C	T	0.0557	|| id:ebi-a-GCST90016998	TRUE	reported	igd	18.9532
	6	70956815	0.103268	0.0229525	4.87405e-06	14306	ebi-a-GCST90016998	rs6923695	T	G	0.0567	|| id:ebi-a-GCST90016998	TRUE	reported	igd	20.2428
	2	115197171	0.155659	0.0375612	3.13914e-06	14306	ebi-a-GCST90016998	rs72839198	C	G	0.0557	|| id:ebi-a-GCST90016998	TRUE	reported	igd	17.1739
	14	39301409	0.196454	0.042565	4.24502e-06	14306	ebi-a-GCST90016998	rs74606150	G	C	0.9543	|| id:ebi-a-GCST90016998	TRUE	reported	igd	21.3018
	chr.exposure	pos.exposure	beta.exposure	se.exposure	pval.exposure	samplesize.exposure	id.exposure	SNP	effect_allele.exposure	other_allele.exposure	eaf.exposure	exposure	mr_keep.exposure	pval_origin.exposure	data_source.exposure	F Value
	14	89484373	0.172263	0.039601	8.27237e-06	14306	ebi-a-GCST90016999	rs10147907	T	G	0.0686	|| id:ebi-a-GCST90016999	TRUE	reported	igd	18.9222
	10	96758467	0.10585	0.0237114	8.20012e-06	14306	ebi-a-GCST90016999	rs11818408	G	A	0.4771	|| id:ebi-a-GCST90016999	TRUE	reported	igd	19.9282
	18	45753272	0.131469	0.0281712	2.66557e-06	14306	ebi-a-GCST90016999	rs11876297	T	C	0.2157	|| id:ebi-a-GCST90016999	TRUE	reported	igd	21.7789
	7	73043561	0.20951	0.0454847	3.09678e-06	14306	ebi-a-GCST90016999	rs151257695	A	G	0.0805	|| id:ebi-a-GCST90016999	TRUE	reported	igd	21.2167
genus Eubacterium fissicatena group id.14373	3	39604954	0.139489	0.0316186	8.70062e-06	14306	ebi-a-GCST90016999	rs1768152	T	C	0.1372	|| id:ebi-a-GCST90016999	TRUE	reported	igd	19.4623
	8	5433699	0.109644	0.0228306	1.49091e-06	14306	ebi-a-GCST90016999	rs2733072	G	A	0.4652	|| id:ebi-a-GCST90016999	TRUE	reported	igd	23.064
	2	71145246	0.130842	0.0266671	7.37904e-07	14306	ebi-a-GCST90016999	rs3771393	C	T	0.2843	|| id:ebi-a-GCST90016999	TRUE	reported	igd	24.0737
	6	39940437	0.111463	0.0252788	9.75326e-06	14306	ebi-a-GCST90016999	rs6934739	A	G	0.2952	|| id:ebi-a-GCST90016999	TRUE	reported	igd	19.4423
	11	115165111	0.138612	0.0291906	2.73149e-06	14306	ebi-a-GCST90016999	rs7104872	G	A	0.1779	|| id:ebi-a-GCST90016999	TRUE	reported	igd	22.5484
	chr.exposure	pos.exposure	beta.exposure	se.exposure	pval.exposure	samplesize.exposure	id.exposure	SNP	effect_allele.exposure	other_allele.exposure	eaf.exposure	exposure	mr_keep.exposure	pval_origin.exposure	data_source.exposure	F Value
	11	58040621	0.115589	0.0252489	5.41914e-06	14306	ebi-a-GCST90017000	rs10501370	T	C	0.9473	|| id:ebi-a-GCST90017000	TRUE	reported	igd	20.9579
	1	34308917	0.0601661	0.0126752	2.60555e-06	14306	ebi-a-GCST90017000	rs10798999	C	T	0.2157	|| id:ebi-a-GCST90017000	TRUE	reported	igd	22.5317
	7	100635375	0.0504747	0.0109922	4.42446e-06	14306	ebi-a-GCST90017000	rs10808115	C	A	0.5219	|| id:ebi-a-GCST90017000	TRUE	reported	igd	21.0852
	11	11771637	0.126582	0.028712	7.85995e-06	14306	ebi-a-GCST90017000	rs117748144	C	T	0.9573	|| id:ebi-a-GCST90017000	TRUE	reported	igd	19.4365
	4	111885431	0.154124	0.0297185	2.9449e-07	14306	ebi-a-GCST90017000	rs13116360	T	C	0.0626	|| id:ebi-a-GCST90017000	TRUE	reported	igd	26.8959
	3	195238086	0.153138	0.0349456	5.43063e-06	14306	ebi-a-GCST90017000	rs138531890	A	G	0.0537	|| id:ebi-a-GCST90017000	TRUE	reported	igd	19.2035
	4	183709536	0.0813986	0.0189272	9.3491e-06	14306	ebi-a-GCST90017000	rs17074066	C	T	0.9085	|| id:ebi-a-GCST90017000	TRUE	reported	igd	18.4953
	1	104524676	0.0810805	0.0184573	9.45453e-06	14306	ebi-a-GCST90017000	rs17474256	G	A	0.1233	|| id:ebi-a-GCST90017000	TRUE	reported	igd	19.2973
genus Eubacterium hallii group id.11338	19	49214274	0.0499523	0.0112153	9.32803e-06	14306	ebi-a-GCST90017000	rs281379	G	A	0.5398	|| id:ebi-a-GCST90017000	TRUE	reported	igd	19.8376
	3	64664456	0.126115	0.0268627	4.43231e-06	14306	ebi-a-GCST90017000	rs28584818	A	G	0.0686	|| id:ebi-a-GCST90017000	TRUE	reported	igd	22.0411
	7	148856720	0.0522832	0.0111865	2.69675e-06	14306	ebi-a-GCST90017000	rs60254196	G	A	0.4592	|| id:ebi-a-GCST90017000	TRUE	reported	igd	21.8442
	18	48384463	0.0508914	0.0114352	9.15756e-06	14306	ebi-a-GCST90017000	rs630939	T	C	0.6004	|| id:ebi-a-GCST90017000	TRUE	reported	igd	19.8062
	3	23663416	0.198087	0.0443545	4.82303e-06	14306	ebi-a-GCST90017000	rs6550770	C	T	0.9483	|| id:ebi-a-GCST90017000	TRUE	reported	igd	19.9451
	15	62014160	0.208943	0.043822	3.70254e-06	14306	ebi-a-GCST90017000	rs74018587	C	T	0.0368	|| id:ebi-a-GCST90017000	TRUE	reported	igd	22.7338
	11	123789877	0.0507411	0.0113758	8.2882e-06	14306	ebi-a-GCST90017000	rs78056098	T	G	0.6392	|| id:ebi-a-GCST90017000	TRUE	reported	igd	19.8955
	3	110283389	0.0540164	0.0116101	3.29003e-06	14306	ebi-a-GCST90017000	rs949971	G	T	0.6163	|| id:ebi-a-GCST90017000	TRUE	reported	igd	21.6461
	chr.exposure	pos.exposure	beta.exposure	se.exposure	pval.exposure	samplesize.exposure	id.exposure	SNP	effect_allele.exposure	other_allele.exposure	eaf.exposure	exposure	mr_keep.exposure	pval_origin.exposure	data_source.exposure	F Value
	7	64894137	0.193496	0.0439023	8.90697e-06	14306	ebi-a-GCST90017001	rs10263623	C	T	0.1044	|| id:ebi-a-GCST90017001	TRUE	reported	igd	19.4254
	7	135052348	0.187753	0.041969	8.3672e-06	14306	ebi-a-GCST90017001	rs10458299	C	T	0.9195	|| id:ebi-a-GCST90017001	TRUE	reported	igd	20.0132
	10	61322015	0.110167	0.024593	7.98656e-06	14306	ebi-a-GCST90017001	rs11006576	G	A	0.4871	|| id:ebi-a-GCST90017001	TRUE	reported	igd	20.0669
	9	28245518	0.185107	0.0403573	5.75705e-06	14306	ebi-a-GCST90017001	rs113893692	T	C	0.9016	|| id:ebi-a-GCST90017001	TRUE	reported	igd	21.0379
	14	52185888	0.186907	0.0341475	6.59781e-08	14306	ebi-a-GCST90017001	rs34297067	G	A	0.8608	|| id:ebi-a-GCST90017001	TRUE	reported	igd	29.9594
genus Eubacterium nodatum group id.11297	10	9659749	0.160621	0.0341609	3.56139e-06	14306	ebi-a-GCST90017001	rs61841040	G	T	0.166	|| id:ebi-a-GCST90017001	TRUE	reported	igd	22.1078
	4	94712747	0.110081	0.0245964	7.82546e-06	14306	ebi-a-GCST90017001	rs6818880	G	A	0.5447	|| id:ebi-a-GCST90017001	TRUE	reported	igd	20.03
	9	96597985	0.201788	0.0413568	9.05378e-07	14306	ebi-a-GCST90017001	rs77910827	C	T	0.1034	|| id:ebi-a-GCST90017001	TRUE	reported	igd	23.8066
	8	4954912	0.1223	0.0271331	7.17348e-06	14306	ebi-a-GCST90017001	rs7827125	C	T	0.2823	|| id:ebi-a-GCST90017001	TRUE	reported	igd	20.3167
	1	171060821	0.125454	0.0275303	6.8388e-06	14306	ebi-a-GCST90017001	rs7880204	C	T	0.7525	|| id:ebi-a-GCST90017001	TRUE	reported	igd	20.7657
	1	34529736	0.130234	0.0292347	7.20676e-06	14306	ebi-a-GCST90017001	rs9425984	C	T	0.7614	|| id:ebi-a-GCST90017001	TRUE	reported	igd	19.845
	chr.exposure	pos.exposure	beta.exposure	se.exposure	pval.exposure	samplesize.exposure	id.exposure	SNP	effect_allele.exposure	other_allele.exposure	eaf.exposure	exposure	mr_keep.exposure	pval_origin.exposure	data_source.exposure	F Value
	1	195064019	0.0893273	0.0198333	5.79522e-06	14306	ebi-a-GCST90017002	rs12129908	C	A	0.4473	|| id:ebi-a-GCST90017002	TRUE	reported	igd	20.2852
	12	94515340	0.14098	0.0295029	2.62924e-06	14306	ebi-a-GCST90017002	rs12423772	G	T	0.1501	|| id:ebi-a-GCST90017002	TRUE	reported	igd	22.8342
genus Eubacterium oxidoreducens group id.11339	4	187905399	0.0906104	0.0200612	7.32285e-06	14306	ebi-a-GCST90017002	rs1425962	G	C	0.3429	|| id:ebi-a-GCST90017002	TRUE	reported	igd	20.4006
	4	37526679	0.0923559	0.0195439	2.38836e-06	14306	ebi-a-GCST90017002	rs2973294	G	T	0.4205	|| id:ebi-a-GCST90017002	TRUE	reported	igd	22.3309
	16	86480355	0.216145	0.045992	2.51166e-06	14306	ebi-a-GCST90017002	rs34561138	G	A	0.0586	|| id:ebi-a-GCST90017002	TRUE	reported	igd	22.0864
	5	106882394	0.0932766	0.0195294	1.65406e-06	14306	ebi-a-GCST90017002	rs440215	C	T	0.4622	|| id:ebi-a-GCST90017002	TRUE	reported	igd	22.8122
	chr.exposure	pos.exposure	beta.exposure	se.exposure	pval.exposure	samplesize.exposure	id.exposure	SNP	effect_allele.exposure	other_allele.exposure	eaf.exposure	exposure	mr_keep.exposure	pval_origin.exposure	data_source.exposure	F Value
	7	121281238	0.0527827	0.0113464	4.20678e-06	14306	ebi-a-GCST90017003	rs10248854	A	C	0.6402	|| id:ebi-a-GCST90017003	TRUE	reported	igd	21.6405
	1	234530370	0.0503179	0.0108389	3.53387e-06	14306	ebi-a-GCST90017003	rs10797540	A	G	0.4344	|| id:ebi-a-GCST90017003	TRUE	reported	igd	21.5514
	11	98523638	0.0635522	0.0140072	6.21828e-06	14306	ebi-a-GCST90017003	rs10892089	G	C	0.8032	|| id:ebi-a-GCST90017003	TRUE	reported	igd	20.5854
	12	20066025	0.113141	0.0243541	1.84434e-06	14306	ebi-a-GCST90017003	rs117151453	C	G	0.9493	|| id:ebi-a-GCST90017003	TRUE	reported	igd	21.5822
genus Eubacterium rectale group id.14374	1	116082909	0.0870025	0.019779	9.75371e-06	14306	ebi-a-GCST90017003	rs143694765	T	C	0.0944	|| id:ebi-a-GCST90017003	TRUE	reported	igd	19.3488
	18	37703874	0.156596	0.0336234	4.10129e-06	14306	ebi-a-GCST90017003	rs16960159	G	C	0.9523	|| id:ebi-a-GCST90017003	TRUE	reported	igd	21.6909
	11	8129537	0.129364	0.0289021	6.44421e-06	14306	ebi-a-GCST90017003	rs2884897	G	A	0.9473	|| id:ebi-a-GCST90017003	TRUE	reported	igd	20.034
	2	125553155	0.0528824	0.0109486	1.37965e-06	14306	ebi-a-GCST90017003	rs314726	T	C	0.4573	|| id:ebi-a-GCST90017003	TRUE	reported	igd	23.3295
	15	93006765	0.0901402	0.0174602	5.39946e-07	14306	ebi-a-GCST90017003	rs35398954	G	A	0.8787	|| id:ebi-a-GCST90017003	TRUE	reported	igd	26.6525
	1	170900221	0.0622701	0.0140572	6.8552e-06	14306	ebi-a-GCST90017003	rs3980709	T	A	0.839	|| id:ebi-a-GCST90017003	TRUE	reported	igd	19.6228
	15	87881513	0.0517316	0.0118196	9.68412e-06	14306	ebi-a-GCST90017003	rs58498416	T	C	0.7157	|| id:ebi-a-GCST90017003	TRUE	reported	igd	19.1561
	9	129425745	0.0576035	0.0130853	5.36908e-06	14306	ebi-a-GCST90017003	rs59427698	G	A	0.7972	|| id:ebi-a-GCST90017003	TRUE	reported	igd	19.379
	9	92013419	0.0536319	0.0120201	9.89829e-06	14306	ebi-a-GCST90017003	rs62547233	A	G	0.3072	|| id:ebi-a-GCST90017003	TRUE	reported	igd	19.9081
	chr.exposure	pos.exposure	beta.exposure	se.exposure	pval.exposure	samplesize.exposure	id.exposure	SNP	effect_allele.exposure	other_allele.exposure	eaf.exposure	exposure	mr_keep.exposure	pval_origin.exposure	data_source.exposure	F Value
	14	52219066	0.199832	0.0414577	2.38666e-06	14306	ebi-a-GCST90017004	rs10131724	C	A	0.9364	|| id:ebi-a-GCST90017004	TRUE	reported	igd	23.2338
	1	88523399	0.0726438	0.0160924	6.79548e-06	14306	ebi-a-GCST90017004	rs10923018	G	A	0.4722	|| id:ebi-a-GCST90017004	TRUE	reported	igd	20.3777
	22	48749548	0.143141	0.0293757	5.8217e-06	14306	ebi-a-GCST90017004	rs112375806	T	A	0.1074	|| id:ebi-a-GCST90017004	TRUE	reported	igd	23.7439
	15	61289622	0.073258	0.0160888	5.43676e-06	14306	ebi-a-GCST90017004	rs11637981	T	G	0.5159	|| id:ebi-a-GCST90017004	TRUE	reported	igd	20.733
	2	201610645	0.0737077	0.0163786	6.96835e-06	14306	ebi-a-GCST90017004	rs13025464	C	T	0.6173	|| id:ebi-a-GCST90017004	TRUE	reported	igd	20.2522
	22	25303055	0.0845439	0.0171791	8.58836e-07	14306	ebi-a-GCST90017004	rs139749	T	C	0.6581	|| id:ebi-a-GCST90017004	TRUE	reported	igd	24.2194
	5	33897589	0.174787	0.0390573	2.38122e-06	14306	ebi-a-GCST90017004	rs16891896	A	G	0.9414	|| id:ebi-a-GCST90017004	TRUE	reported	igd	20.0269
	12	30360954	0.107804	0.0233984	4.7036e-06	14306	ebi-a-GCST90017004	rs17519472	C	T	0.1541	|| id:ebi-a-GCST90017004	TRUE	reported	igd	21.2274
genus Eubacterium ruminantium group id.11340	6	11953633	0.103488	0.0236391	9.23145e-06	14306	ebi-a-GCST90017004	rs209813	A	G	0.834	|| id:ebi-a-GCST90017004	TRUE	reported	igd	19.1654
	5	121182996	0.0911461	0.0182353	4.67369e-07	14306	ebi-a-GCST90017004	rs2116427	A	G	0.2565	|| id:ebi-a-GCST90017004	TRUE	reported	igd	24.9833
	9	130980937	0.153538	0.0323922	2.15894e-06	14306	ebi-a-GCST90017004	rs2229917	A	G	0.0666	|| id:ebi-a-GCST90017004	TRUE	reported	igd	22.4673
	2	71247578	0.0748879	0.0165852	6.17248e-06	14306	ebi-a-GCST90017004	rs2418654	T	C	0.5219	|| id:ebi-a-GCST90017004	TRUE	reported	igd	20.3883
	1	3044181	0.0734306	0.0163687	7.86955e-06	14306	ebi-a-GCST90017004	rs2817174	T	C	0.5706	|| id:ebi-a-GCST90017004	TRUE	reported	igd	20.1245
	6	130030114	0.0979429	0.0212166	4.93276e-06	14306	ebi-a-GCST90017004	rs57340348	C	T	0.7853	|| id:ebi-a-GCST90017004	TRUE	reported	igd	21.3105
	9	2539358	0.0833243	0.018056	4.81637e-06	14306	ebi-a-GCST90017004	rs606117	A	G	0.332	|| id:ebi-a-GCST90017004	TRUE	reported	igd	21.2961
	1	197978281	0.0888124	0.0196447	6.37984e-06	14306	ebi-a-GCST90017004	rs6676699	T	G	0.7783	|| id:ebi-a-GCST90017004	TRUE	reported	igd	20.4388
	8	138626268	0.0762282	0.016523	4.06846e-06	14306	ebi-a-GCST90017004	rs7000472	G	A	0.6382	|| id:ebi-a-GCST90017004	TRUE	reported	igd	21.284
	10	129037453	0.139825	0.030069	2.62126e-06	14306	ebi-a-GCST90017004	rs72836424	T	C	0.9046	|| id:ebi-a-GCST90017004	TRUE	reported	igd	21.6238
	12	63306003	0.115098	0.0247909	5.36204e-06	14306	ebi-a-GCST90017004	rs73139629	C	A	0.8678	|| id:ebi-a-GCST90017004	TRUE	reported	igd	21.5551
	chr.exposure	pos.exposure	beta.exposure	se.exposure	pval.exposure	samplesize.exposure	id.exposure	SNP	effect_allele.exposure	other_allele.exposure	eaf.exposure	exposure	mr_keep.exposure	pval_origin.exposure	data_source.exposure	F Value
	13	98785900	0.143349	0.0286241	7.21755e-07	14306	ebi-a-GCST90017005	rs11617697	G	A	0.9523	|| id:ebi-a-GCST90017005	TRUE	reported	igd	25.0799
	18	22460785	0.0587198	0.0123453	2.07501e-06	14306	ebi-a-GCST90017005	rs12964517	G	A	0.3161	|| id:ebi-a-GCST90017005	TRUE	reported	igd	22.6238
	3	107736434	0.0715522	0.016137	9.55983e-06	14306	ebi-a-GCST90017005	rs13082419	T	C	0.83	|| id:ebi-a-GCST90017005	TRUE	reported	igd	19.6608
	8	114445055	0.0906428	0.0191909	1.73968e-06	14306	ebi-a-GCST90017005	rs16884680	T	G	0.8926	|| id:ebi-a-GCST90017005	TRUE	reported	igd	22.3088
	14	51960625	0.0627263	0.013786	5.75798e-06	14306	ebi-a-GCST90017005	rs35179274	T	C	0.7565	|| id:ebi-a-GCST90017005	TRUE	reported	igd	20.7025
	14	44975510	0.0548171	0.0118426	3.5532e-06	14306	ebi-a-GCST90017005	rs3809430	C	T	0.6521	|| id:ebi-a-GCST90017005	TRUE	reported	igd	21.4258
	3	190223732	0.0783394	0.0160257	7.9704e-07	14306	ebi-a-GCST90017005	rs57199565	T	C	0.2406	|| id:ebi-a-GCST90017005	TRUE	reported	igd	23.8961
	20	2308307	0.0603594	0.011658	2.50323e-07	14306	ebi-a-GCST90017005	rs6048195	T	A	0.5209	|| id:ebi-a-GCST90017005	TRUE	reported	igd	26.8066
	1	109398264	0.0751501	0.0164978	6.11139e-06	14306	ebi-a-GCST90017005	rs66746423	C	T	0.1561	|| id:ebi-a-GCST90017005	TRUE	reported	igd	20.7495
genus Eubacterium ventriosum group id.11341	3	171895485	0.0528752	0.0117972	6.8691e-06	14306	ebi-a-GCST90017005	rs66830358	T	A	0.4175	|| id:ebi-a-GCST90017005	TRUE	reported	igd	20.0884
	2	203661779	0.0739179	0.0166705	6.62232e-06	14306	ebi-a-GCST90017005	rs6704822	A	G	0.1163	|| id:ebi-a-GCST90017005	TRUE	reported	igd	19.6608
	16	60348381	0.0658926	0.0143747	6.54757e-06	14306	ebi-a-GCST90017005	rs72783037	C	A	0.1869	|| id:ebi-a-GCST90017005	TRUE	reported	igd	21.0124
	20	50140919	0.0956303	0.0193428	9.53608e-07	14306	ebi-a-GCST90017005	rs73615400	C	T	0.9095	|| id:ebi-a-GCST90017005	TRUE	reported	igd	24.4429
	4	126371814	0.0975711	0.0224388	5.20907e-06	14306	ebi-a-GCST90017005	rs73849225	T	C	0.0795	|| id:ebi-a-GCST90017005	TRUE	reported	igd	18.9079
	1	147291928	0.0749762	0.0164404	3.35792e-06	14306	ebi-a-GCST90017005	rs78250280	G	A	0.1491	|| id:ebi-a-GCST90017005	TRUE	reported	igd	20.798
	12	52423996	0.0618696	0.0132532	2.88908e-06	14306	ebi-a-GCST90017005	rs876734	T	C	0.7107	|| id:ebi-a-GCST90017005	TRUE	reported	igd	21.7928
	13	51938576	0.0817111	0.0183121	7.8352e-06	14306	ebi-a-GCST90017005	rs9316536	G	T	0.8638	|| id:ebi-a-GCST90017005	TRUE	reported	igd	19.9107
	chr.exposure	pos.exposure	beta.exposure	se.exposure	pval.exposure	samplesize.exposure	id.exposure	SNP	effect_allele.exposure	other_allele.exposure	eaf.exposure	exposure	mr_keep.exposure	pval_origin.exposure	data_source.exposure	F Value
	14	73181783	0.0576795	0.012599	4.95861e-06	14306	ebi-a-GCST90017006	rs10140184	A	C	0.4125	|| id:ebi-a-GCST90017006	TRUE	reported	igd	20.959
	1	22627266	0.0612633	0.0130917	3.15152e-06	14306	ebi-a-GCST90017006	rs10917203	A	C	0.335	|| id:ebi-a-GCST90017006	TRUE	reported	igd	21.8982
	16	73696771	0.113455	0.0245762	3.32767e-06	14306	ebi-a-GCST90017006	rs112176119	T	C	0.9354	|| id:ebi-a-GCST90017006	TRUE	reported	igd	21.3117
	19	8255478	0.108274	0.0238257	5.01938e-06	14306	ebi-a-GCST90017006	rs12980122	G	C	0.9155	|| id:ebi-a-GCST90017006	TRUE	reported	igd	20.6518
	7	43566344	0.0687427	0.0142728	1.81782e-06	14306	ebi-a-GCST90017006	rs13239072	G	A	0.2753	|| id:ebi-a-GCST90017006	TRUE	reported	igd	23.1972
genus Eubacterium xylanophilum group id.14375	20	57995506	0.160597	0.0310515	2.38891e-07	14306	ebi-a-GCST90017006	rs17830032	A	G	0.9463	|| id:ebi-a-GCST90017006	TRUE	reported	igd	26.7491
	9	130498120	0.0949051	0.0203503	3.75491e-06	14306	ebi-a-GCST90017006	rs1999224	T	G	0.9115	|| id:ebi-a-GCST90017006	TRUE	reported	igd	21.7489
	16	84790559	0.0573202	0.0126905	6.52544e-06	14306	ebi-a-GCST90017006	rs2012708	A	G	0.3638	|| id:ebi-a-GCST90017006	TRUE	reported	igd	20.4013
	11	131009660	0.0877797	0.0189012	4.21328e-06	14306	ebi-a-GCST90017006	rs2213117	T	G	0.161	|| id:ebi-a-GCST90017006	TRUE	reported	igd	21.568
	1	246780557	0.0553508	0.0123588	7.19615e-06	14306	ebi-a-GCST90017006	rs4654122	C	G	0.4394	|| id:ebi-a-GCST90017006	TRUE	reported	igd	20.0583
	4	87891938	0.114498	0.0263455	9.38707e-06	14306	ebi-a-GCST90017006	rs75586835	G	A	0.9334	|| id:ebi-a-GCST90017006	TRUE	reported	igd	18.8879
	17	66689958	0.0951677	0.0199969	2.40979e-06	14306	ebi-a-GCST90017006	rs79582700	G	C	0.8926	|| id:ebi-a-GCST90017006	TRUE	reported	igd	22.6492
	chr.exposure	pos.exposure	beta.exposure	se.exposure	pval.exposure	samplesize.exposure	id.exposure	SNP	effect_allele.exposure	other_allele.exposure	eaf.exposure	exposure	mr_keep.exposure	pval_origin.exposure	data_source.exposure	F Value
	1	245267339	0.232262	0.0512364	7.01892e-06	14306	ebi-a-GCST90017007	rs10927394	T	G	0.9732	|| id:ebi-a-GCST90017007	TRUE	reported	igd	20.5494
	2	37125235	0.0861565	0.01896	5.69574e-06	14306	ebi-a-GCST90017007	rs114946999	T	C	0.9016	|| id:ebi-a-GCST90017007	TRUE	reported	igd	20.649
	8	38593645	0.078354	0.017183	6.39676e-06	14306	ebi-a-GCST90017007	rs11776390	C	T	0.9105	|| id:ebi-a-GCST90017007	TRUE	reported	igd	20.7933
	12	83502773	0.094833	0.0163962	7.56955e-09	14306	ebi-a-GCST90017007	rs12320842	C	G	0.1322	|| id:ebi-a-GCST90017007	TRUE	reported	igd	33.4528
	14	64044097	0.0576251	0.0119649	1.3017e-06	14306	ebi-a-GCST90017007	rs1271565	T	C	0.7276	|| id:ebi-a-GCST90017007	TRUE	reported	igd	23.1956
	1	14201546	0.0641305	0.0149933	8.80278e-06	14306	ebi-a-GCST90017007	rs12753492	A	C	0.1491	|| id:ebi-a-GCST90017007	TRUE	reported	igd	18.2951
genus Faecalibacterium id.2057	21	39027901	0.0866356	0.0196496	7.54397e-06	14306	ebi-a-GCST90017007	rs2835874	C	T	0.9304	|| id:ebi-a-GCST90017007	TRUE	reported	igd	19.4395
	15	47404021	0.0504817	0.0109368	3.66454e-06	14306	ebi-a-GCST90017007	rs28376661	C	G	0.3738	|| id:ebi-a-GCST90017007	TRUE	reported	igd	21.3053
	10	128614990	0.0817953	0.018369	9.18015e-06	14306	ebi-a-GCST90017007	rs61875484	C	G	0.0905	|| id:ebi-a-GCST90017007	TRUE	reported	igd	19.8283
	6	131587157	0.134864	0.0277032	1.37848e-06	14306	ebi-a-GCST90017007	rs6910935	A	G	0.0537	|| id:ebi-a-GCST90017007	TRUE	reported	igd	23.6991
	16	6099863	0.227585	0.0465522	1.76449e-06	14306	ebi-a-GCST90017007	rs75499067	C	T	0.0636	|| id:ebi-a-GCST90017007	TRUE	reported	igd	23.9005
	1	111036827	0.145631	0.0323019	8.13561e-06	14306	ebi-a-GCST90017007	rs79656633	T	C	0.1054	|| id:ebi-a-GCST90017007	TRUE	reported	igd	20.326
	13	53567017	0.048317	0.010797	5.33261e-06	14306	ebi-a-GCST90017007	rs9536330	C	T	0.5915	|| id:ebi-a-GCST90017007	TRUE	reported	igd	20.026
	chr.exposure	pos.exposure	beta.exposure	se.exposure	pval.exposure	samplesize.exposure	id.exposure	SNP	effect_allele.exposure	other_allele.exposure	eaf.exposure	exposure	mr_keep.exposure	pval_origin.exposure	data_source.exposure	F Value
	2	74195551	0.0904399	0.0196301	5.91248e-06	14306	ebi-a-GCST90017008	rs11126423	C	T	0.1133	|| id:ebi-a-GCST90017008	TRUE	reported	igd	21.2263
	4	38917830	0.0759493	0.0172101	9.02049e-06	14306	ebi-a-GCST90017008	rs11736617	A	G	0.8797	|| id:ebi-a-GCST90017008	TRUE	reported	igd	19.4751
	12	18127597	0.096065	0.020828	2.55806e-06	14306	ebi-a-GCST90017008	rs12812672	C	T	0.9264	|| id:ebi-a-GCST90017008	TRUE	reported	igd	21.2733
	15	40047706	0.0811976	0.0183335	6.90828e-06	14306	ebi-a-GCST90017008	rs12911842	T	A	0.8757	|| id:ebi-a-GCST90017008	TRUE	reported	igd	19.6153
	5	14159925	0.0645635	0.0143225	7.48187e-06	14306	ebi-a-GCST90017008	rs149302	C	T	0.7873	|| id:ebi-a-GCST90017008	TRUE	reported	igd	20.3206
genus Family XIII AD3011 group id.11293	1	240694163	0.0608052	0.0122149	6.75118e-07	14306	ebi-a-GCST90017008	rs16840310	G	A	0.6282	|| id:ebi-a-GCST90017008	TRUE	reported	igd	24.78
	15	58683697	0.0732552	0.0159898	3.90841e-06	14306	ebi-a-GCST90017008	rs16940167	C	T	0.169	|| id:ebi-a-GCST90017008	TRUE	reported	igd	20.989
	7	28603985	0.112891	0.0245292	4.1917e-06	14306	ebi-a-GCST90017008	rs17156849	A	G	0.9374	|| id:ebi-a-GCST90017008	TRUE	reported	igd	21.1813
	16	16006242	0.128753	0.0276002	3.89081e-06	14306	ebi-a-GCST90017008	rs62029761	A	G	0.0676	|| id:ebi-a-GCST90017008	TRUE	reported	igd	21.7616
	20	4618639	0.0800851	0.0163834	5.80216e-07	14306	ebi-a-GCST90017008	rs62200412	T	C	0.829	|| id:ebi-a-GCST90017008	TRUE	reported	igd	23.8944
	1	192019835	0.0899559	0.0177107	6.88763e-07	14306	ebi-a-GCST90017008	rs72730932	A	C	0.836	|| id:ebi-a-GCST90017008	TRUE	reported	igd	25.7981
	9	136678954	0.0649589	0.0147534	7.87807e-06	14306	ebi-a-GCST90017008	rs739451	C	T	0.1759	|| id:ebi-a-GCST90017008	TRUE	reported	igd	19.3862
	3	29811865	0.10752	0.0240482	8.70803e-06	14306	ebi-a-GCST90017008	rs9837139	A	G	0.0815	|| id:ebi-a-GCST90017008	TRUE	reported	igd	19.99
	3	3556826	0.0657834	0.0129056	3.87543e-07	14306	ebi-a-GCST90017008	rs9852893	C	G	0.2565	|| id:ebi-a-GCST90017008	TRUE	reported	igd	25.9822
	chr.exposure	pos.exposure	beta.exposure	se.exposure	pval.exposure	samplesize.exposure	id.exposure	SNP	effect_allele.exposure	other_allele.exposure	eaf.exposure	exposure	mr_keep.exposure	pval_origin.exposure	data_source.exposure	F Value
	17	33761027	0.149047	0.0333271	7.87771e-06	14306	ebi-a-GCST90017009	rs112362903	G	A	0.9573	|| id:ebi-a-GCST90017009	TRUE	reported	igd	20.001
	15	25151194	0.121679	0.0260821	3.04635e-06	14306	ebi-a-GCST90017009	rs116979587	A	T	0.9294	|| id:ebi-a-GCST90017009	TRUE	reported	igd	21.7644
	1	85228325	0.0647298	0.0134065	1.17379e-06	14306	ebi-a-GCST90017009	rs12049454	C	T	0.6988	|| id:ebi-a-GCST90017009	TRUE	reported	igd	23.3119
	3	188224096	0.0665521	0.0137151	1.24934e-06	14306	ebi-a-GCST90017009	rs1426266	C	T	0.7038	|| id:ebi-a-GCST90017009	TRUE	reported	igd	23.5465
	21	45153079	0.0759406	0.0165099	5.35673e-06	14306	ebi-a-GCST90017009	rs2276529	G	C	0.8141	|| id:ebi-a-GCST90017009	TRUE	reported	igd	21.1572
	1	183503664	0.112639	0.0242751	5.19709e-06	14306	ebi-a-GCST90017009	rs3842897	A	G	0.9354	|| id:ebi-a-GCST90017009	TRUE	reported	igd	21.5306
genus Family XIII UCG001 id.11294	6	76598635	0.0611904	0.013457	4.29181e-06	14306	ebi-a-GCST90017009	rs62414802	T	C	0.7018	|| id:ebi-a-GCST90017009	TRUE	reported	igd	20.6762
	11	94681786	0.0809085	0.0174782	3.52493e-06	14306	ebi-a-GCST90017009	rs7119679	A	G	0.8499	|| id:ebi-a-GCST90017009	TRUE	reported	igd	21.4287
	3	45479090	0.19313	0.0419866	3.77477e-06	14306	ebi-a-GCST90017009	rs76463770	A	G	0.0517	|| id:ebi-a-GCST90017009	TRUE	reported	igd	21.1582
	17	78223817	0.088655	0.0198094	8.01826e-06	14306	ebi-a-GCST90017009	rs8076666	A	G	0.1362	|| id:ebi-a-GCST90017009	TRUE	reported	igd	20.0292
	chr.exposure	pos.exposure	beta.exposure	se.exposure	pval.exposure	samplesize.exposure	id.exposure	SNP	effect_allele.exposure	other_allele.exposure	eaf.exposure	exposure	mr_keep.exposure	pval_origin.exposure	data_source.exposure	F Value
	5	168218403	0.130067	0.0294087	7.12525e-06	14306	ebi-a-GCST90017010	rs114873521	T	C	0.9235	|| id:ebi-a-GCST90017010	TRUE	reported	igd	19.5606
	16	6696929	0.14686	0.0325191	6.6489e-06	14306	ebi-a-GCST90017010	rs11642826	G	C	0.0636	|| id:ebi-a-GCST90017010	TRUE	reported	igd	20.3953
genus Flavonifractor id.2059	1	237351354	0.116063	0.0241012	2.07348e-06	14306	ebi-a-GCST90017010	rs11811696	C	T	0.8897	|| id:ebi-a-GCST90017010	TRUE	reported	igd	23.1905
	1	77887835	0.0692276	0.0137467	5.60841e-07	14306	ebi-a-GCST90017010	rs12030302	G	A	0.5089	|| id:ebi-a-GCST90017010	TRUE	reported	igd	25.3607
	1	102287083	0.0942719	0.0211646	9.37195e-06	14306	ebi-a-GCST90017010	rs12038887	C	G	0.1093	|| id:ebi-a-GCST90017010	TRUE	reported	igd	19.8401
	11	44849689	0.0764294	0.0159789	1.52086e-06	14306	ebi-a-GCST90017010	rs34066017	A	G	0.2455	|| id:ebi-a-GCST90017010	TRUE	reported	igd	22.8785
	2	50201547	0.0833919	0.0184596	8.10905e-06	14306	ebi-a-GCST90017010	rs6761463	C	G	0.835	|| id:ebi-a-GCST90017010	TRUE	reported	igd	20.4081
	16	96987	0.0637125	0.0141608	7.02231e-06	14306	ebi-a-GCST90017010	rs798674	G	C	0.4155	|| id:ebi-a-GCST90017010	TRUE	reported	igd	20.2429
	10	32381186	0.0667272	0.0136557	1.17972e-06	14306	ebi-a-GCST90017010	rs806808	T	C	0.4761	|| id:ebi-a-GCST90017010	TRUE	reported	igd	23.8769
	chr.exposure	pos.exposure	beta.exposure	se.exposure	pval.exposure	samplesize.exposure	id.exposure	SNP	effect_allele.exposure	other_allele.exposure	eaf.exposure	exposure	mr_keep.exposure	pval_origin.exposure	data_source.exposure	F Value
	21	42681392	0.0572129	0.0130007	7.68493e-06	14306	ebi-a-GCST90017011	rs10439674	G	A	0.7982	|| id:ebi-a-GCST90017011	TRUE	reported	igd	19.3666
	20	55937366	0.0659543	0.0148763	5.86894e-06	14306	ebi-a-GCST90017011	rs167879	T	C	0.833	|| id:ebi-a-GCST90017011	TRUE	reported	igd	19.6561
	17	70721782	0.0494799	0.0108105	4.96158e-06	14306	ebi-a-GCST90017011	rs1864685	C	A	0.5348	|| id:ebi-a-GCST90017011	TRUE	reported	igd	20.9491
	10	112177119	0.0967298	0.0205426	2.98834e-06	14306	ebi-a-GCST90017011	rs2025938	A	G	0.9235	|| id:ebi-a-GCST90017011	TRUE	reported	igd	22.1722
	9	130371107	0.0497415	0.0107941	3.94176e-06	14306	ebi-a-GCST90017011	rs2039204	A	T	0.5686	|| id:ebi-a-GCST90017011	TRUE	reported	igd	21.2356
	18	10370596	0.0568339	0.0127894	8.95757e-06	14306	ebi-a-GCST90017011	rs206581	G	A	0.7913	|| id:ebi-a-GCST90017011	TRUE	reported	igd	19.7476
	8	15360718	0.0771914	0.0160344	1.07686e-06	14306	ebi-a-GCST90017011	rs2132128	A	G	0.835	|| id:ebi-a-GCST90017011	TRUE	reported	igd	23.1757
genus Fusicatenibacter id.11305	10	120447429	0.0953657	0.020407	3.93895e-06	14306	ebi-a-GCST90017011	rs3303	C	T	0.9235	|| id:ebi-a-GCST90017011	TRUE	reported	igd	21.8387
	1	24927625	0.0616691	0.0125259	7.20444e-07	14306	ebi-a-GCST90017011	rs4378146	C	A	0.7584	|| id:ebi-a-GCST90017011	TRUE	reported	igd	24.2391
	7	148856720	0.0492427	0.0109365	5.46739e-06	14306	ebi-a-GCST90017011	rs60254196	G	A	0.4592	|| id:ebi-a-GCST90017011	TRUE	reported	igd	20.2734
	2	226649570	0.0710571	0.015924	4.54527e-06	14306	ebi-a-GCST90017011	rs62187631	C	T	0.8598	|| id:ebi-a-GCST90017011	TRUE	reported	igd	19.9118
	5	29595000	0.0701397	0.0145589	1.56769e-06	14306	ebi-a-GCST90017011	rs62353480	G	A	0.829	|| id:ebi-a-GCST90017011	TRUE	reported	igd	23.2098
	20	25257001	0.141575	0.0313559	7.28652e-06	14306	ebi-a-GCST90017011	rs6515626	G	A	0.0616	|| id:ebi-a-GCST90017011	TRUE	reported	igd	20.3861
	3	64252803	0.0739124	0.0151073	7.77428e-07	14306	ebi-a-GCST90017011	rs704418	T	C	0.1859	|| id:ebi-a-GCST90017011	TRUE	reported	igd	23.9365
	10	125464544	0.0509014	0.0111381	5.41627e-06	14306	ebi-a-GCST90017011	rs7069626	T	C	0.34	|| id:ebi-a-GCST90017011	TRUE	reported	igd	20.8851
	12	58658311	0.0597324	0.0134458	8.29564e-06	14306	ebi-a-GCST90017011	rs73103914	G	A	0.8221	|| id:ebi-a-GCST90017011	TRUE	reported	igd	19.7354
	2	5532793	0.0508345	0.0113843	8.49533e-06	14306	ebi-a-GCST90017011	rs792108	C	T	0.6461	|| id:ebi-a-GCST90017011	TRUE	reported	igd	19.939
	15	88353215	0.0792146	0.0180505	8.06325e-06	14306	ebi-a-GCST90017011	rs8028026	G	A	0.9085	|| id:ebi-a-GCST90017011	TRUE	reported	igd	19.2589
	16	73821805	0.104026	0.022217	4.9289e-06	14306	ebi-a-GCST90017011	rs8063430	C	T	0.9404	|| id:ebi-a-GCST90017011	TRUE	reported	igd	21.9237
	17	70697344	0.061617	0.0136576	7.30988e-06	14306	ebi-a-GCST90017011	rs9905659	A	G	0.8121	|| id:ebi-a-GCST90017011	TRUE	reported	igd	20.3541
	chr.exposure	pos.exposure	beta.exposure	se.exposure	pval.exposure	samplesize.exposure	id.exposure	SNP	effect_allele.exposure	other_allele.exposure	eaf.exposure	exposure	mr_keep.exposure	pval_origin.exposure	data_source.exposure	F Value
	7	129433205	0.128261	0.0285123	9.16706e-06	14306	ebi-a-GCST90017012	rs117347059	C	G	0.7932	|| id:ebi-a-GCST90017012	TRUE	reported	igd	20.236
	2	30158494	0.107597	0.0239228	8.61133e-06	14306	ebi-a-GCST90017012	rs13412653	A	C	0.3539	|| id:ebi-a-GCST90017012	TRUE	reported	igd	20.2291
	17	52957210	0.196423	0.0433538	6.37016e-06	14306	ebi-a-GCST90017012	rs16955299	A	G	0.9165	|| id:ebi-a-GCST90017012	TRUE	reported	igd	20.5272
	7	136937189	0.17869	0.037722	4.0242e-06	14306	ebi-a-GCST90017012	rs322296	G	A	0.1193	|| id:ebi-a-GCST90017012	TRUE	reported	igd	22.4394
	4	8142607	0.180293	0.0403296	8.10849e-06	14306	ebi-a-GCST90017012	rs35042269	A	C	0.8111	|| id:ebi-a-GCST90017012	TRUE	reported	igd	19.9853
	1	210628449	0.190729	0.0433608	7.16902e-06	14306	ebi-a-GCST90017012	rs3765837	G	T	0.9215	|| id:ebi-a-GCST90017012	TRUE	reported	igd	19.3481
	9	88787144	0.102908	0.0231571	9.0567e-06	14306	ebi-a-GCST90017012	rs4596722	A	G	0.4761	|| id:ebi-a-GCST90017012	TRUE	reported	igd	19.7483
genus Gordonibacter id.821	12	131024079	0.172495	0.0388567	8.36681e-06	14306	ebi-a-GCST90017012	rs61934597	T	C	0.9245	|| id:ebi-a-GCST90017012	TRUE	reported	igd	19.707
	7	47144505	0.153972	0.0338918	7.03947e-06	14306	ebi-a-GCST90017012	rs71545975	G	A	0.827	|| id:ebi-a-GCST90017012	TRUE	reported	igd	20.6393
	17	10148653	0.116884	0.0234834	6.70641e-07	14306	ebi-a-GCST90017012	rs7220558	A	T	0.4324	|| id:ebi-a-GCST90017012	TRUE	reported	igd	24.7735
	4	136768501	0.181405	0.0377102	1.42889e-06	14306	ebi-a-GCST90017012	rs72714787	C	A	0.1044	|| id:ebi-a-GCST90017012	TRUE	reported	igd	23.1409
	1	83136096	0.21399	0.0490592	7.98197e-06	14306	ebi-a-GCST90017012	rs72939513	G	A	0.9463	|| id:ebi-a-GCST90017012	TRUE	reported	igd	19.0259
	12	29024534	0.12867	0.0249946	3.43764e-07	14306	ebi-a-GCST90017012	rs7294633	C	T	0.3509	|| id:ebi-a-GCST90017012	TRUE	reported	igd	26.501
	3	187450354	0.242965	0.0466177	1.67487e-07	14306	ebi-a-GCST90017012	rs76287110	T	A	0.9294	|| id:ebi-a-GCST90017012	TRUE	reported	igd	27.1635
	7	18970607	0.149852	0.0333315	7.75586e-06	14306	ebi-a-GCST90017012	rs768830	G	A	0.1292	|| id:ebi-a-GCST90017012	TRUE	reported	igd	20.2123
	chr.exposure	pos.exposure	beta.exposure	se.exposure	pval.exposure	samplesize.exposure	id.exposure	SNP	effect_allele.exposure	other_allele.exposure	eaf.exposure	exposure	mr_keep.exposure	pval_origin.exposure	data_source.exposure	F Value
	9	78752170	0.0948915	0.0203221	4.32265e-06	14306	ebi-a-GCST90017013	rs10781340	G	A	0.166	|| id:ebi-a-GCST90017013	TRUE	reported	igd	21.8031
	11	9951672	0.0677384	0.0151463	7.36529e-06	14306	ebi-a-GCST90017013	rs10840326	G	C	0.5567	|| id:ebi-a-GCST90017013	TRUE	reported	igd	20.0012
	16	48742489	0.124265	0.026016	1.27347e-06	14306	ebi-a-GCST90017013	rs111582866	A	G	0.8986	|| id:ebi-a-GCST90017013	TRUE	reported	igd	22.8148
	6	129224488	0.106544	0.0200323	1.46913e-07	14306	ebi-a-GCST90017013	rs12191680	C	G	0.165	|| id:ebi-a-GCST90017013	TRUE	reported	igd	28.2876
	13	85114550	0.0749201	0.016711	9.62498e-06	14306	ebi-a-GCST90017013	rs12876183	T	A	0.2753	|| id:ebi-a-GCST90017013	TRUE	reported	igd	20.0998
	12	115493337	0.128249	0.0268779	2.00951e-06	14306	ebi-a-GCST90017013	rs35509	G	A	0.0785	|| id:ebi-a-GCST90017013	TRUE	reported	igd	22.7676
	22	26891808	0.0705861	0.0151388	3.47848e-06	14306	ebi-a-GCST90017013	rs4822728	T	C	0.4374	|| id:ebi-a-GCST90017013	TRUE	reported	igd	21.7398
	7	24360361	0.108393	0.0247052	7.23236e-06	14306	ebi-a-GCST90017013	rs56310940	C	G	0.9175	|| id:ebi-a-GCST90017013	TRUE	reported	igd	19.2498
genus Haemophilus id.3698	10	94306385	0.244638	0.0505504	1.83033e-06	14306	ebi-a-GCST90017013	rs76022354	C	T	0.0328	|| id:ebi-a-GCST90017013	TRUE	reported	igd	23.4206
	9	105650242	0.246256	0.0503924	1.66744e-06	14306	ebi-a-GCST90017013	rs78909003	C	T	0.9503	|| id:ebi-a-GCST90017013	TRUE	reported	igd	23.8805
	6	8350917	0.0723095	0.0148799	1.42269e-06	14306	ebi-a-GCST90017013	rs9328464	T	C	0.492	|| id:ebi-a-GCST90017013	TRUE	reported	igd	23.6151
	6	55448491	0.093521	0.0172649	7.12049e-08	14306	ebi-a-GCST90017013	rs9382510	T	C	0.7545	|| id:ebi-a-GCST90017013	TRUE	reported	igd	29.342
	13	36104947	0.0736375	0.0155227	2.18022e-06	14306	ebi-a-GCST90017013	rs9574096	T	A	0.6382	|| id:ebi-a-GCST90017013	TRUE	reported	igd	22.5042
	17	64535013	0.192957	0.0416755	2.14062e-06	14306	ebi-a-GCST90017013	rs9895850	C	T	0.9503	|| id:ebi-a-GCST90017013	TRUE	reported	igd	21.4368
	chr.exposure	pos.exposure	beta.exposure	se.exposure	pval.exposure	samplesize.exposure	id.exposure	SNP	effect_allele.exposure	other_allele.exposure	eaf.exposure	exposure	mr_keep.exposure	pval_origin.exposure	data_source.exposure	F Value
	10	125021315	0.0839384	0.0190567	7.87989e-06	14306	ebi-a-GCST90017014	rs12415649	G	C	0.2376	|| id:ebi-a-GCST90017014	TRUE	reported	igd	19.4011
	4	71000791	0.0903906	0.0195276	4.65479e-06	14306	ebi-a-GCST90017014	rs12513188	G	A	0.2217	|| id:ebi-a-GCST90017014	TRUE	reported	igd	21.4264
	13	50932063	0.227285	0.0510135	7.71951e-06	14306	ebi-a-GCST90017014	rs17586763	C	T	0.9821	|| id:ebi-a-GCST90017014	TRUE	reported	igd	19.8505
	7	14728950	0.0954096	0.021093	5.34724e-06	14306	ebi-a-GCST90017014	rs1830029	G	C	0.8201	|| id:ebi-a-GCST90017014	TRUE	reported	igd	20.4601
	1	65153340	0.107972	0.0231421	7.50136e-06	14306	ebi-a-GCST90017014	rs1926302	A	G	0.8469	|| id:ebi-a-GCST90017014	TRUE	reported	igd	21.7679
genus Holdemanella id.11393	8	138623633	0.104505	0.022601	5.13499e-06	14306	ebi-a-GCST90017014	rs34187114	A	C	0.834	|| id:ebi-a-GCST90017014	TRUE	reported	igd	21.3805
	3	85392882	0.0934832	0.0202886	7.29844e-06	14306	ebi-a-GCST90017014	rs35228298	G	A	0.2465	|| id:ebi-a-GCST90017014	TRUE	reported	igd	21.2306
	9	105004835	0.0927334	0.0194435	2.10092e-06	14306	ebi-a-GCST90017014	rs4541991	C	T	0.7644	|| id:ebi-a-GCST90017014	TRUE	reported	igd	22.747
	6	4148609	0.0854214	0.0172515	7.19449e-07	14306	ebi-a-GCST90017014	rs607782	C	T	0.6183	|| id:ebi-a-GCST90017014	TRUE	reported	igd	24.5177
	19	7668225	0.105447	0.0232029	5.53886e-06	14306	ebi-a-GCST90017014	rs62113381	C	T	0.841	|| id:ebi-a-GCST90017014	TRUE	reported	igd	20.653
	19	15020095	0.0961669	0.0199336	1.36044e-06	14306	ebi-a-GCST90017014	rs73011279	C	T	0.7922	|| id:ebi-a-GCST90017014	TRUE	reported	igd	23.2745
	10	4494630	0.283103	0.0598999	1.94272e-06	14306	ebi-a-GCST90017014	rs75764681	C	T	0.9374	|| id:ebi-a-GCST90017014	TRUE	reported	igd	22.3376
	6	163603171	0.0959801	0.0179537	1.37775e-07	14306	ebi-a-GCST90017014	rs761624	C	G	0.3082	|| id:ebi-a-GCST90017014	TRUE	reported	igd	28.5795
	19	43851935	0.078999	0.01734	4.62392e-06	14306	ebi-a-GCST90017014	rs8113760	G	A	0.3519	|| id:ebi-a-GCST90017014	TRUE	reported	igd	20.7561
	chr.exposure	pos.exposure	beta.exposure	se.exposure	pval.exposure	samplesize.exposure	id.exposure	SNP	effect_allele.exposure	other_allele.exposure	eaf.exposure	exposure	mr_keep.exposure	pval_origin.exposure	data_source.exposure	F Value
	10	115332413	0.135137	0.0301894	8.59825e-06	14306	ebi-a-GCST90017015	rs10885477	C	T	0.9384	|| id:ebi-a-GCST90017015	TRUE	reported	igd	20.0373
	17	26789271	0.0665238	0.0149837	6.66884e-06	14306	ebi-a-GCST90017015	rs11080063	A	G	0.5338	|| id:ebi-a-GCST90017015	TRUE	reported	igd	19.7113
	15	93110222	0.120677	0.0265781	3.70775e-06	14306	ebi-a-GCST90017015	rs111745969	A	G	0.0795	|| id:ebi-a-GCST90017015	TRUE	reported	igd	20.6158
	8	123973840	0.128935	0.0282526	9.35729e-06	14306	ebi-a-GCST90017015	rs113593397	G	A	0.8976	|| id:ebi-a-GCST90017015	TRUE	reported	igd	20.8269
	13	81685543	0.13755	0.0293386	2.34477e-06	14306	ebi-a-GCST90017015	rs116500994	T	G	0.9483	|| id:ebi-a-GCST90017015	TRUE	reported	igd	21.9807
	7	38292857	0.0660617	0.0149427	9.51853e-06	14306	ebi-a-GCST90017015	rs12701617	G	A	0.5417	|| id:ebi-a-GCST90017015	TRUE	reported	igd	19.5453
	12	39589195	0.162139	0.0332089	2.37766e-06	14306	ebi-a-GCST90017015	rs150096134	T	A	0.0626	|| id:ebi-a-GCST90017015	TRUE	reported	igd	23.8378
	11	18768068	0.0842919	0.0162192	2.7388e-07	14306	ebi-a-GCST90017015	rs1867876	T	C	0.2942	|| id:ebi-a-GCST90017015	TRUE	reported	igd	27.0093
genus Holdemania id.2157	14	102553414	0.124871	0.0270129	2.44433e-06	14306	ebi-a-GCST90017015	rs41438744	G	C	0.9274	|| id:ebi-a-GCST90017015	TRUE	reported	igd	21.3688
	5	106209093	0.079488	0.0177002	7.2297e-06	14306	ebi-a-GCST90017015	rs4146507	C	T	0.2217	|| id:ebi-a-GCST90017015	TRUE	reported	igd	20.1673
	17	76443497	0.128671	0.0282795	5.89196e-06	14306	ebi-a-GCST90017015	rs55888180	C	G	0.0875	|| id:ebi-a-GCST90017015	TRUE	reported	igd	20.7023
	20	3839754	0.0910829	0.0178561	5.16928e-07	14306	ebi-a-GCST90017015	rs6133067	T	C	0.3111	|| id:ebi-a-GCST90017015	TRUE	reported	igd	26.0196
	7	63323145	0.148594	0.0327469	7.77177e-06	14306	ebi-a-GCST90017015	rs73139538	A	G	0.9473	|| id:ebi-a-GCST90017015	TRUE	reported	igd	20.5903
	5	77388406	0.164556	0.0341775	1.77468e-06	14306	ebi-a-GCST90017015	rs77293403	A	G	0.0457	|| id:ebi-a-GCST90017015	TRUE	reported	igd	23.1818
	10	129908282	0.232987	0.0519183	6.04213e-06	14306	ebi-a-GCST90017015	rs80149660	T	C	0.9414	|| id:ebi-a-GCST90017015	TRUE	reported	igd	20.1383
	6	105737322	0.0926764	0.0178886	4.08517e-07	14306	ebi-a-GCST90017015	rs9500080	C	T	0.2346	|| id:ebi-a-GCST90017015	TRUE	reported	igd	26.8402
	13	70856516	0.074038	0.0160494	5.96664e-06	14306	ebi-a-GCST90017015	rs9529719	T	C	0.325	|| id:ebi-a-GCST90017015	TRUE	reported	igd	21.281
	3	60615680	0.0788638	0.0176744	8.38147e-06	14306	ebi-a-GCST90017015	rs967319	T	C	0.2465	|| id:ebi-a-GCST90017015	TRUE	reported	igd	19.9098
	chr.exposure	pos.exposure	beta.exposure	se.exposure	pval.exposure	samplesize.exposure	id.exposure	SNP	effect_allele.exposure	other_allele.exposure	eaf.exposure	exposure	mr_keep.exposure	pval_origin.exposure	data_source.exposure	F Value
	15	98476920	0.147352	0.0336531	8.58875e-06	14306	ebi-a-GCST90017016	rs10048062	T	C	0.8926	|| id:ebi-a-GCST90017016	TRUE	reported	igd	19.1718
	17	17253288	0.105833	0.0228941	3.80391e-06	14306	ebi-a-GCST90017016	rs12452946	G	A	0.499	|| id:ebi-a-GCST90017016	TRUE	reported	igd	21.3695
	18	43206985	0.227831	0.046335	2.55918e-06	14306	ebi-a-GCST90017016	rs1484873	G	A	0.9314	|| id:ebi-a-GCST90017016	TRUE	reported	igd	24.1773
	7	133154356	0.169366	0.0352068	1.12323e-06	14306	ebi-a-GCST90017016	rs17167098	A	G	0.8867	|| id:ebi-a-GCST90017016	TRUE	reported	igd	23.1419
	14	95452797	0.192557	0.0420093	9.97034e-06	14306	ebi-a-GCST90017016	rs2154047	A	C	0.9324	|| id:ebi-a-GCST90017016	TRUE	reported	igd	21.0101
genus Howardella id.2000	7	93527414	0.18123	0.0402987	4.70046e-06	14306	ebi-a-GCST90017016	rs36081916	C	T	0.8887	|| id:ebi-a-GCST90017016	TRUE	reported	igd	20.2245
	2	218819396	0.147035	0.034023	9.49708e-06	14306	ebi-a-GCST90017016	rs3791893	A	G	0.1233	|| id:ebi-a-GCST90017016	TRUE	reported	igd	18.6765
	4	169178315	0.112045	0.0239328	3.34488e-06	14306	ebi-a-GCST90017016	rs609430	G	T	0.661	|| id:ebi-a-GCST90017016	TRUE	reported	igd	21.9178
	1	72972799	0.136779	0.0296811	4.02736e-06	14306	ebi-a-GCST90017016	rs61771805	T	A	0.8131	|| id:ebi-a-GCST90017016	TRUE	reported	igd	21.2363
	18	60125134	0.164146	0.0349993	3.52468e-06	14306	ebi-a-GCST90017016	rs672217	G	A	0.1412	|| id:ebi-a-GCST90017016	TRUE	reported	igd	21.9959
	11	77901287	0.12718	0.0250924	6.5286e-07	14306	ebi-a-GCST90017016	rs901099	G	T	0.6879	|| id:ebi-a-GCST90017016	TRUE	reported	igd	25.6894
	chr.exposure	pos.exposure	beta.exposure	se.exposure	pval.exposure	samplesize.exposure	id.exposure	SNP	effect_allele.exposure	other_allele.exposure	eaf.exposure	exposure	mr_keep.exposure	pval_origin.exposure	data_source.exposure	F Value
	5	58424440	0.139547	0.0316748	8.06659e-06	14306	ebi-a-GCST90017017	rs10044993	C	A	0.1173	|| id:ebi-a-GCST90017017	TRUE	reported	igd	19.4095
genus Hungatella id.11306	4	166058998	0.149725	0.0312777	1.74997e-06	14306	ebi-a-GCST90017017	rs13128780	C	T	0.8549	|| id:ebi-a-GCST90017017	TRUE	reported	igd	22.915
	8	14853525	0.100023	0.0225883	9.6917e-06	14306	ebi-a-GCST90017017	rs13249325	G	T	0.6332	|| id:ebi-a-GCST90017017	TRUE	reported	igd	19.608
	14	95973619	0.152235	0.0337867	7.37683e-06	14306	ebi-a-GCST90017017	rs17092615	G	A	0.1243	|| id:ebi-a-GCST90017017	TRUE	reported	igd	20.3019
	15	89577376	0.126025	0.0282242	3.86091e-06	14306	ebi-a-GCST90017017	rs72759041	T	G	0.7654	|| id:ebi-a-GCST90017017	TRUE	reported	igd	19.9375
	chr.exposure	pos.exposure	beta.exposure	se.exposure	pval.exposure	samplesize.exposure	id.exposure	SNP	effect_allele.exposure	other_allele.exposure	eaf.exposure	exposure	mr_keep.exposure	pval_origin.exposure	data_source.exposure	F Value
	4	14324623	0.0775151	0.0139665	3.54544e-08	14306	ebi-a-GCST90017018	rs10805326	G	A	0.2783	|| id:ebi-a-GCST90017018	TRUE	reported	igd	30.8033
	12	97928437	0.0624272	0.0138539	5.4949e-06	14306	ebi-a-GCST90017018	rs11109097	C	T	0.3121	|| id:ebi-a-GCST90017018	TRUE	reported	igd	20.305
	16	5993076	0.151829	0.0324471	2.67436e-06	14306	ebi-a-GCST90017018	rs118030283	A	G	0.9622	|| id:ebi-a-GCST90017018	TRUE	reported	igd	21.8956
	9	21502923	0.112189	0.0235439	1.80098e-06	14306	ebi-a-GCST90017018	rs16938435	C	T	0.9394	|| id:ebi-a-GCST90017018	TRUE	reported	igd	22.7062
	11	127703160	0.0575295	0.0128416	6.78875e-06	14306	ebi-a-GCST90017018	rs2098844	T	C	0.5755	|| id:ebi-a-GCST90017018	TRUE	reported	igd	20.0698
genus Intestinibacter id.11345	4	179361262	0.0608559	0.0132145	4.25991e-06	14306	ebi-a-GCST90017018	rs2702387	A	G	0.3519	|| id:ebi-a-GCST90017018	TRUE	reported	igd	21.2082
	15	92446683	0.0810346	0.0154397	1.64327e-07	14306	ebi-a-GCST90017018	rs4327025	A	G	0.8052	|| id:ebi-a-GCST90017018	TRUE	reported	igd	27.5463
	5	148846426	0.0628342	0.0136652	5.6391e-06	14306	ebi-a-GCST90017018	rs447950	A	G	0.2992	|| id:ebi-a-GCST90017018	TRUE	reported	igd	21.1427
	11	125663184	0.142681	0.0297116	1.81991e-06	14306	ebi-a-GCST90017018	rs478972	C	T	0.9404	|| id:ebi-a-GCST90017018	TRUE	reported	igd	23.0611
	20	61325223	0.0924508	0.0204658	6.6799e-06	14306	ebi-a-GCST90017018	rs6062862	A	G	0.0944	|| id:ebi-a-GCST90017018	TRUE	reported	igd	20.4063
	6	170918194	0.151096	0.0351476	6.84227e-06	14306	ebi-a-GCST90017018	rs62430350	T	C	0.0577	|| id:ebi-a-GCST90017018	TRUE	reported	igd	18.4805
	3	70657785	0.0662258	0.0149877	9.25763e-06	14306	ebi-a-GCST90017018	rs68093214	C	T	0.2575	|| id:ebi-a-GCST90017018	TRUE	reported	igd	19.5247
	5	159686256	0.0890455	0.0193905	3.05781e-06	14306	ebi-a-GCST90017018	rs6875660	C	T	0.1233	|| id:ebi-a-GCST90017018	TRUE	reported	igd	21.0885
	2	20054971	0.0583322	0.0130729	7.85037e-06	14306	ebi-a-GCST90017018	rs893394	G	A	0.4195	|| id:ebi-a-GCST90017018	TRUE	reported	igd	19.9101
	6	10303945	0.099082	0.0221625	6.25936e-06	14306	ebi-a-GCST90017018	rs9348442	C	T	0.0875	|| id:ebi-a-GCST90017018	TRUE	reported	igd	19.9872
	chr.exposure	pos.exposure	beta.exposure	se.exposure	pval.exposure	samplesize.exposure	id.exposure	SNP	effect_allele.exposure	other_allele.exposure	eaf.exposure	exposure	mr_keep.exposure	pval_origin.exposure	data_source.exposure	F Value
	13	23343542	0.0585038	0.013219	9.71292e-06	14306	ebi-a-GCST90017019	rs1000888	G	C	0.6044	|| id:ebi-a-GCST90017019	TRUE	reported	igd	19.5871
	7	66890843	0.0918017	0.0194885	2.06072e-06	14306	ebi-a-GCST90017019	rs10262702	T	C	0.1292	|| id:ebi-a-GCST90017019	TRUE	reported	igd	22.1894
	10	13124513	0.0660742	0.0134139	6.982e-07	14306	ebi-a-GCST90017019	rs11258178	A	G	0.4145	|| id:ebi-a-GCST90017019	TRUE	reported	igd	24.2635
	3	17187915	0.0607331	0.0132035	4.20572e-06	14306	ebi-a-GCST90017019	rs11928843	A	G	0.5408	|| id:ebi-a-GCST90017019	TRUE	reported	igd	21.1579
	11	94364293	0.151142	0.0306922	5.12165e-07	14306	ebi-a-GCST90017019	rs12226153	G	A	0.9384	|| id:ebi-a-GCST90017019	TRUE	reported	igd	24.2501
	1	43767569	0.0637084	0.0135355	2.19053e-06	14306	ebi-a-GCST90017019	rs12566247	T	A	0.3479	|| id:ebi-a-GCST90017019	TRUE	reported	igd	22.1536
	8	3763540	0.107194	0.0250013	6.37926e-06	14306	ebi-a-GCST90017019	rs17067892	C	T	0.0765	|| id:ebi-a-GCST90017019	TRUE	reported	igd	18.383
	7	22007303	0.060368	0.0131793	4.1223e-06	14306	ebi-a-GCST90017019	rs1859797	G	A	0.504	|| id:ebi-a-GCST90017019	TRUE	reported	igd	20.9811
	3	150620956	0.0685233	0.0152546	7.84061e-06	14306	ebi-a-GCST90017019	rs2276760	G	A	0.7803	|| id:ebi-a-GCST90017019	TRUE	reported	igd	20.1779
genus Intestinimonas id.2062	5	17209391	0.120632	0.0257529	1.91743e-06	14306	ebi-a-GCST90017019	rs2731794	C	T	0.0596	|| id:ebi-a-GCST90017019	TRUE	reported	igd	21.9418
	16	85327902	0.0729524	0.0152948	1.34623e-06	14306	ebi-a-GCST90017019	rs2930225	G	T	0.2584	|| id:ebi-a-GCST90017019	TRUE	reported	igd	22.7505
	20	6218922	0.218507	0.0490152	7.41635e-06	14306	ebi-a-GCST90017019	rs4113676	C	A	0.9384	|| id:ebi-a-GCST90017019	TRUE	reported	igd	19.8733
	16	58818770	0.175324	0.038599	8.71806e-07	14306	ebi-a-GCST90017019	rs4784055	C	T	0.9443	|| id:ebi-a-GCST90017019	TRUE	reported	igd	20.6315
	3	10611142	0.130074	0.0267179	2.20308e-06	14306	ebi-a-GCST90017019	rs62240188	G	A	0.0686	|| id:ebi-a-GCST90017019	TRUE	reported	igd	23.7015
	6	155737906	0.162658	0.0367647	9.40503e-06	14306	ebi-a-GCST90017019	rs62427239	C	A	0.0457	|| id:ebi-a-GCST90017019	TRUE	reported	igd	19.5744
	6	67200802	0.0692373	0.0151154	8.56959e-06	14306	ebi-a-GCST90017019	rs6934519	C	T	0.2753	|| id:ebi-a-GCST90017019	TRUE	reported	igd	20.9817
	2	6514088	0.0818068	0.0165992	8.56624e-07	14306	ebi-a-GCST90017019	rs716604	A	G	0.1879	|| id:ebi-a-GCST90017019	TRUE	reported	igd	24.2887
	15	93819735	0.0658116	0.0140767	2.98353e-06	14306	ebi-a-GCST90017019	rs7170984	C	T	0.7097	|| id:ebi-a-GCST90017019	TRUE	reported	igd	21.8576
	2	140898088	0.183158	0.0402743	4.91157e-06	14306	ebi-a-GCST90017019	rs72982915	C	T	0.0457	|| id:ebi-a-GCST90017019	TRUE	reported	igd	20.6822
	4	114608814	0.141905	0.0315074	7.305e-06	14306	ebi-a-GCST90017019	rs994794	C	G	0.9602	|| id:ebi-a-GCST90017019	TRUE	reported	igd	20.2848
	chr.exposure	pos.exposure	beta.exposure	se.exposure	pval.exposure	samplesize.exposure	id.exposure	SNP	effect_allele.exposure	other_allele.exposure	eaf.exposure	exposure	mr_keep.exposure	pval_origin.exposure	data_source.exposure	F Value
	3	66725825	0.078627	0.0175644	6.31379e-06	14306	ebi-a-GCST90017020	rs1031599	T	G	0.9155	|| id:ebi-a-GCST90017020	TRUE	reported	igd	20.039
	1	185091351	0.0468097	0.0105787	9.57194e-06	14306	ebi-a-GCST90017020	rs12566975	C	T	0.507	|| id:ebi-a-GCST90017020	TRUE	reported	igd	19.5797
	2	167244051	0.0497799	0.0111919	9.63984e-06	14306	ebi-a-GCST90017020	rs1528479	A	G	0.6302	|| id:ebi-a-GCST90017020	TRUE	reported	igd	19.7834
	12	102046595	0.108075	0.0242022	5.97077e-06	14306	ebi-a-GCST90017020	rs1997204	C	T	0.9473	|| id:ebi-a-GCST90017020	TRUE	reported	igd	19.9407
	18	19743455	0.0746186	0.0180734	7.13724e-06	14306	ebi-a-GCST90017020	rs2385421	A	G	0.1044	|| id:ebi-a-GCST90017020	TRUE	reported	igd	17.0457
genus Lachnoclostridium id.11308	4	38694566	0.0864066	0.0192519	6.72048e-06	14306	ebi-a-GCST90017020	rs3821998	A	C	0.9115	|| id:ebi-a-GCST90017020	TRUE	reported	igd	20.144
	8	59370320	0.0520267	0.011404	4.41754e-06	14306	ebi-a-GCST90017020	rs4738679	A	G	0.6352	|| id:ebi-a-GCST90017020	TRUE	reported	igd	20.8132
	20	19300846	0.0561715	0.0108174	2.43215e-07	14306	ebi-a-GCST90017020	rs6112314	C	A	0.6034	|| id:ebi-a-GCST90017020	TRUE	reported	igd	26.9641
	3	23037786	0.0511752	0.0106491	2.0268e-06	14306	ebi-a-GCST90017020	rs615997	T	C	0.499	|| id:ebi-a-GCST90017020	TRUE	reported	igd	23.0937
	16	27217620	0.0469989	0.0105971	9.17044e-06	14306	ebi-a-GCST90017020	rs62028349	G	C	0.505	|| id:ebi-a-GCST90017020	TRUE	reported	igd	19.6699
	3	177470032	0.0864203	0.0181565	1.58332e-06	14306	ebi-a-GCST90017020	rs62285313	A	G	0.0855	|| id:ebi-a-GCST90017020	TRUE	reported	igd	22.6552
	17	46694541	0.117472	0.0268103	5.57763e-06	14306	ebi-a-GCST90017020	rs72829893	G	T	0.0656	|| id:ebi-a-GCST90017020	TRUE	reported	igd	19.1984
	17	13816159	0.0886199	0.0194248	3.66522e-06	14306	ebi-a-GCST90017020	rs78068103	A	G	0.0915	|| id:ebi-a-GCST90017020	TRUE	reported	igd	20.8137
	18	1053252	0.0641288	0.0137974	3.75327e-06	14306	ebi-a-GCST90017020	rs789029	T	C	0.8111	|| id:ebi-a-GCST90017020	TRUE	reported	igd	21.6029
	chr.exposure	pos.exposure	beta.exposure	se.exposure	pval.exposure	samplesize.exposure	id.exposure	SNP	effect_allele.exposure	other_allele.exposure	eaf.exposure	exposure	mr_keep.exposure	pval_origin.exposure	data_source.exposure	F Value
	8	121244406	0.0568869	0.0121152	3.05626e-06	14306	ebi-a-GCST90017021	rs10093861	A	G	0.502	|| id:ebi-a-GCST90017021	TRUE	reported	igd	22.0477
	5	109403564	0.108906	0.0242055	2.55452e-06	14306	ebi-a-GCST90017021	rs113859143	C	G	0.9155	|| id:ebi-a-GCST90017021	TRUE	reported	igd	20.243
	1	35328576	0.106101	0.0222904	2.15432e-06	14306	ebi-a-GCST90017021	rs12078956	C	G	0.1213	|| id:ebi-a-GCST90017021	TRUE	reported	igd	22.657
	10	44346094	0.105963	0.0232501	5.59667e-06	14306	ebi-a-GCST90017021	rs1254846	G	A	0.0915	|| id:ebi-a-GCST90017021	TRUE	reported	igd	20.7711
	19	17865305	0.200628	0.0449372	1.58161e-06	14306	ebi-a-GCST90017021	rs1363769	C	T	0.9672	|| id:ebi-a-GCST90017021	TRUE	reported	igd	19.9329
	4	166588085	0.0666305	0.0141577	5.20811e-06	14306	ebi-a-GCST90017021	rs2322265	T	C	0.7445	|| id:ebi-a-GCST90017021	TRUE	reported	igd	22.1493
	3	165996415	0.0564927	0.0121736	3.91913e-06	14306	ebi-a-GCST90017021	rs2862811	T	C	0.4543	|| id:ebi-a-GCST90017021	TRUE	reported	igd	21.5351
	11	3248876	0.190615	0.0414403	2.62029e-06	14306	ebi-a-GCST90017021	rs35035870	C	T	0.9642	|| id:ebi-a-GCST90017021	TRUE	reported	igd	21.1577
	16	23631307	0.125481	0.0259008	3.14826e-06	14306	ebi-a-GCST90017021	rs369444	C	G	0.0636	|| id:ebi-a-GCST90017021	TRUE	reported	igd	23.4709
genus Lachnospiraceae FCS020 group id.11314	10	65563647	0.0550587	0.0121847	6.55043e-06	14306	ebi-a-GCST90017021	rs3999074	T	G	0.5219	|| id:ebi-a-GCST90017021	TRUE	reported	igd	20.4184
	6	71966268	0.0604208	0.0135965	8.98194e-06	14306	ebi-a-GCST90017021	rs4452603	T	G	0.2863	|| id:ebi-a-GCST90017021	TRUE	reported	igd	19.7478
	2	53523566	0.0613709	0.0131055	2.37941e-06	14306	ebi-a-GCST90017021	rs62140927	C	T	0.2843	|| id:ebi-a-GCST90017021	TRUE	reported	igd	21.9289
	19	2571232	0.0679483	0.0133496	3.721e-07	14306	ebi-a-GCST90017021	rs7249113	G	A	0.2813	|| id:ebi-a-GCST90017021	TRUE	reported	igd	25.9072
	2	53946431	0.116881	0.0246589	1.63422e-06	14306	ebi-a-GCST90017021	rs72793667	G	A	0.9165	|| id:ebi-a-GCST90017021	TRUE	reported	igd	22.4668
	4	165786478	0.055381	0.0123659	7.47291e-06	14306	ebi-a-GCST90017021	rs9308097	A	G	0.4523	|| id:ebi-a-GCST90017021	TRUE	reported	igd	20.0572
	13	40419314	0.062804	0.0130744	1.38618e-06	14306	ebi-a-GCST90017021	rs9788306	T	C	0.7157	|| id:ebi-a-GCST90017021	TRUE	reported	igd	23.0744
	1	118425334	0.0553339	0.0120621	4.90671e-06	14306	ebi-a-GCST90017021	rs9919338	C	G	0.5636	|| id:ebi-a-GCST90017021	TRUE	reported	igd	21.0444
	chr.exposure	pos.exposure	beta.exposure	se.exposure	pval.exposure	samplesize.exposure	id.exposure	SNP	effect_allele.exposure	other_allele.exposure	eaf.exposure	exposure	mr_keep.exposure	pval_origin.exposure	data_source.exposure	F Value
	17	21157406	0.169687	0.0383169	9.13314e-06	14306	ebi-a-GCST90017022	rs117467633	C	T	0.9374	|| id:ebi-a-GCST90017022	TRUE	reported	igd	19.6118
	1	234157721	0.115182	0.0246006	3.10592e-06	14306	ebi-a-GCST90017022	rs12127733	G	A	0.1779	|| id:ebi-a-GCST90017022	TRUE	reported	igd	21.9219
	6	22725908	0.154739	0.0340372	9.74833e-06	14306	ebi-a-GCST90017022	rs12208226	A	C	0.8936	|| id:ebi-a-GCST90017022	TRUE	reported	igd	20.6677
	13	47512191	0.156365	0.0345372	6.03976e-06	14306	ebi-a-GCST90017022	rs12863463	A	G	0.9453	|| id:ebi-a-GCST90017022	TRUE	reported	igd	20.4977
genus Lachnospiraceae NC2004 group id.11316	9	122239986	0.0948806	0.0208369	5.34355e-06	14306	ebi-a-GCST90017022	rs1331592	C	G	0.2286	|| id:ebi-a-GCST90017022	TRUE	reported	igd	20.7343
	18	58229086	0.154631	0.0352194	5.61203e-06	14306	ebi-a-GCST90017022	rs17067076	A	G	0.9235	|| id:ebi-a-GCST90017022	TRUE	reported	igd	19.2765
	9	29334137	0.102522	0.0226445	6.17234e-06	14306	ebi-a-GCST90017022	rs1928659	T	C	0.2495	|| id:ebi-a-GCST90017022	TRUE	reported	igd	20.4979
	13	76829562	0.0837206	0.0190318	9.05503e-06	14306	ebi-a-GCST90017022	rs1929743	T	C	0.3121	|| id:ebi-a-GCST90017022	TRUE	reported	igd	19.3511
	5	149544722	0.0883469	0.0188397	3.32583e-06	14306	ebi-a-GCST90017022	rs3756315	G	A	0.661	|| id:ebi-a-GCST90017022	TRUE	reported	igd	21.9905
	20	5330700	0.0994748	0.0209139	2.92247e-06	14306	ebi-a-GCST90017022	rs6116753	G	A	0.2396	|| id:ebi-a-GCST90017022	TRUE	reported	igd	22.6233
	chr.exposure	pos.exposure	beta.exposure	se.exposure	pval.exposure	samplesize.exposure	id.exposure	SNP	effect_allele.exposure	other_allele.exposure	eaf.exposure	exposure	mr_keep.exposure	pval_origin.exposure	data_source.exposure	F Value
	4	7678735	0.0636978	0.0142041	4.47806e-06	14306	ebi-a-GCST90017023	rs13110238	G	C	0.7555	|| id:ebi-a-GCST90017023	TRUE	reported	igd	20.1104
genus Lachnospiraceae ND3007 group id.11317	3	172950553	0.0572304	0.0127279	7.36936e-06	14306	ebi-a-GCST90017023	rs2861203	G	A	0.3191	|| id:ebi-a-GCST90017023	TRUE	reported	igd	20.2181
	10	14137663	0.0647067	0.014797	8.71686e-06	14306	ebi-a-GCST90017023	rs72776675	C	T	0.825	|| id:ebi-a-GCST90017023	TRUE	reported	igd	19.1228
	16	1100633	0.0561864	0.0115984	1.24882e-06	14306	ebi-a-GCST90017023	rs9932954	G	A	0.5716	|| id:ebi-a-GCST90017023	TRUE	reported	igd	23.4675
	chr.exposure	pos.exposure	beta.exposure	se.exposure	pval.exposure	samplesize.exposure	id.exposure	SNP	effect_allele.exposure	other_allele.exposure	eaf.exposure	exposure	mr_keep.exposure	pval_origin.exposure	data_source.exposure	F Value
	7	8497922	0.0487709	0.0109614	9.08113e-06	14306	ebi-a-GCST90017024	rs10952110	G	T	0.4483	|| id:ebi-a-GCST90017024	TRUE	reported	igd	19.7965
	17	35240097	0.0524615	0.0116758	5.06512e-06	14306	ebi-a-GCST90017024	rs11263806	G	A	0.7217	|| id:ebi-a-GCST90017024	TRUE	reported	igd	20.1887
	11	3922055	0.0573168	0.0115466	8.0423e-07	14306	ebi-a-GCST90017024	rs12362320	G	C	0.336	|| id:ebi-a-GCST90017024	TRUE	reported	igd	24.6408
	19	21806125	0.0902532	0.0199652	5.83042e-06	14306	ebi-a-GCST90017024	rs12611395	G	A	0.9105	|| id:ebi-a-GCST90017024	TRUE	reported	igd	20.4352
genus Lachnospiraceae NK4A136 group id.11319	5	6116659	0.0513831	0.0108094	2.12197e-06	14306	ebi-a-GCST90017024	rs160061	A	G	0.4682	|| id:ebi-a-GCST90017024	TRUE	reported	igd	22.5963
	8	84735080	0.0508285	0.0110591	9.34329e-06	14306	ebi-a-GCST90017024	rs28540839	A	C	0.4871	|| id:ebi-a-GCST90017024	TRUE	reported	igd	21.1239
	17	30016653	0.0599578	0.0134693	5.61423e-06	14306	ebi-a-GCST90017024	rs2880566	T	C	0.1879	|| id:ebi-a-GCST90017024	TRUE	reported	igd	19.8153
	3	55181375	0.0492283	0.0109388	7.05424e-06	14306	ebi-a-GCST90017024	rs4955932	C	T	0.6044	|| id:ebi-a-GCST90017024	TRUE	reported	igd	20.253
	5	90289997	0.0936162	0.0207982	9.45388e-06	14306	ebi-a-GCST90017024	rs59805249	T	C	0.0905	|| id:ebi-a-GCST90017024	TRUE	reported	igd	20.2605
	14	100177681	0.0549104	0.0115385	2.36777e-06	14306	ebi-a-GCST90017024	rs68104925	C	T	0.6292	|| id:ebi-a-GCST90017024	TRUE	reported	igd	22.647
	10	62175024	0.0499621	0.0109693	5.26914e-06	14306	ebi-a-GCST90017024	rs7073658	G	T	0.5954	|| id:ebi-a-GCST90017024	TRUE	reported	igd	20.7455
	19	51256120	0.10758	0.0229884	3.57256e-06	14306	ebi-a-GCST90017024	rs73044693	G	A	0.9334	|| id:ebi-a-GCST90017024	TRUE	reported	igd	21.9001
	3	190415145	0.230542	0.0483465	2.77389e-06	14306	ebi-a-GCST90017024	rs7616165	T	G	0.9632	|| id:ebi-a-GCST90017024	TRUE	reported	igd	22.7389
	3	161749981	0.22973	0.0499776	2.93089e-06	14306	ebi-a-GCST90017024	rs76193507	G	A	0.9433	|| id:ebi-a-GCST90017024	TRUE	reported	igd	21.1293
	8	4842929	0.0714756	0.0151703	3.57084e-06	14306	ebi-a-GCST90017024	rs7832116	G	A	0.8539	|| id:ebi-a-GCST90017024	TRUE	reported	igd	22.1987
	1	54578401	0.0520656	0.0109082	1.78201e-06	14306	ebi-a-GCST90017024	rs954878	G	A	0.5497	|| id:ebi-a-GCST90017024	TRUE	reported	igd	22.7822
	chr.exposure	pos.exposure	beta.exposure	se.exposure	pval.exposure	samplesize.exposure	id.exposure	SNP	effect_allele.exposure	other_allele.exposure	eaf.exposure	exposure	mr_keep.exposure	pval_origin.exposure	data_source.exposure	F Value
	9	7273249	0.0683706	0.0143691	1.71502e-06	14306	ebi-a-GCST90017025	rs10815577	G	C	0.6133	|| id:ebi-a-GCST90017025	TRUE	reported	igd	22.6402
	1	166199362	0.117095	0.02591	7.39861e-06	14306	ebi-a-GCST90017025	rs12131224	C	T	0.1163	|| id:ebi-a-GCST90017025	TRUE	reported	igd	20.4241
	1	82384407	0.0751466	0.0153934	1.10647e-06	14306	ebi-a-GCST90017025	rs2050911	G	A	0.3042	|| id:ebi-a-GCST90017025	TRUE	reported	igd	23.8314
genus Lachnospiraceae UCG001 id.11321	12	56256262	0.0761893	0.0170127	7.55962e-06	14306	ebi-a-GCST90017025	rs2371284	C	T	0.7773	|| id:ebi-a-GCST90017025	TRUE	reported	igd	20.0559
	3	42568440	0.0784637	0.0144768	7.16556e-08	14306	ebi-a-GCST90017025	rs437876	T	C	0.3728	|| id:ebi-a-GCST90017025	TRUE	reported	igd	29.376
	14	21455973	0.0681973	0.0149831	6.08597e-06	14306	ebi-a-GCST90017025	rs4981345	C	T	0.6491	|| id:ebi-a-GCST90017025	TRUE	reported	igd	20.7172
	9	14477851	0.107898	0.0232346	3.10506e-06	14306	ebi-a-GCST90017025	rs573933	C	T	0.8976	|| id:ebi-a-GCST90017025	TRUE	reported	igd	21.5653
	7	96965504	0.0748504	0.0165681	5.87503e-06	14306	ebi-a-GCST90017025	rs62496417	G	T	0.7286	|| id:ebi-a-GCST90017025	TRUE	reported	igd	20.41
	17	36155074	0.0816269	0.01838	9.01675e-06	14306	ebi-a-GCST90017025	rs7213933	A	T	0.8052	|| id:ebi-a-GCST90017025	TRUE	reported	igd	19.7231
	8	56839500	0.0784757	0.0177648	9.48135e-06	14306	ebi-a-GCST90017025	rs7341608	C	T	0.8101	|| id:ebi-a-GCST90017025	TRUE	reported	igd	19.5142
	16	79092359	0.168045	0.0382637	3.3335e-06	14306	ebi-a-GCST90017025	rs74034332	G	A	0.0457	|| id:ebi-a-GCST90017025	TRUE	reported	igd	19.2876
	1	53773248	0.118868	0.0259753	3.38174e-06	14306	ebi-a-GCST90017025	rs78848836	G	A	0.9165	|| id:ebi-a-GCST90017025	TRUE	reported	igd	20.9415
	1	108102470	0.087088	0.0197008	8.27428e-06	14306	ebi-a-GCST90017025	rs79476906	A	T	0.8559	|| id:ebi-a-GCST90017025	TRUE	reported	igd	19.5411
	19	13962924	0.0892098	0.0197665	8.04211e-06	14306	ebi-a-GCST90017025	rs8104225	A	G	0.1491	|| id:ebi-a-GCST90017025	TRUE	reported	igd	20.3688
	6	145006780	0.107801	0.0229777	3.46785e-06	14306	ebi-a-GCST90017025	rs9403580	C	T	0.1093	|| id:ebi-a-GCST90017025	TRUE	reported	igd	22.0106
	3	148269083	0.0970258	0.0181807	1.45589e-07	14306	ebi-a-GCST90017025	rs985416	C	T	0.2058	|| id:ebi-a-GCST90017025	TRUE	reported	igd	28.4809
	chr.exposure	pos.exposure	beta.exposure	se.exposure	pval.exposure	samplesize.exposure	id.exposure	SNP	effect_allele.exposure	other_allele.exposure	eaf.exposure	exposure	mr_keep.exposure	pval_origin.exposure	data_source.exposure	F Value
	3	70592215	0.0648288	0.0140126	4.51742e-06	14306	ebi-a-GCST90017026	rs11128180	A	G	0.2237	|| id:ebi-a-GCST90017026	TRUE	reported	igd	21.4042
	1	105287469	0.133104	0.0303566	7.07375e-06	14306	ebi-a-GCST90017026	rs12072562	T	C	0.0517	|| id:ebi-a-GCST90017026	TRUE	reported	igd	19.2254
	6	78609654	0.0550876	0.0124186	7.02878e-06	14306	ebi-a-GCST90017026	rs12202257	A	G	0.5994	|| id:ebi-a-GCST90017026	TRUE	reported	igd	19.6772
	7	71303007	0.0554351	0.0118375	2.98078e-06	14306	ebi-a-GCST90017026	rs12673420	G	A	0.4414	|| id:ebi-a-GCST90017026	TRUE	reported	igd	21.9306
	1	240359089	0.062197	0.0125685	8.64868e-07	14306	ebi-a-GCST90017026	rs12747809	A	G	0.66	|| id:ebi-a-GCST90017026	TRUE	reported	igd	24.4891
	14	40536481	0.0579792	0.0125229	4.3395e-06	14306	ebi-a-GCST90017026	rs12894272	A	G	0.3002	|| id:ebi-a-GCST90017026	TRUE	reported	igd	21.4355
genus Lachnospiraceae UCG004 id.11324	6	14817584	0.0799088	0.017766	6.28463e-06	14306	ebi-a-GCST90017026	rs233486	G	A	0.8757	|| id:ebi-a-GCST90017026	TRUE	reported	igd	20.2307
	6	81318836	0.0542433	0.0118188	4.77079e-06	14306	ebi-a-GCST90017026	rs2444793	T	C	0.5298	|| id:ebi-a-GCST90017026	TRUE	reported	igd	21.0642
	13	51292902	0.0901399	0.0199712	9.83853e-06	14306	ebi-a-GCST90017026	rs2706242	C	G	0.9066	|| id:ebi-a-GCST90017026	TRUE	reported	igd	20.3716
	4	183247601	0.0548397	0.0120844	6.30406e-06	14306	ebi-a-GCST90017026	rs2726805	A	G	0.4085	|| id:ebi-a-GCST90017026	TRUE	reported	igd	20.594
	2	49904589	0.0577091	0.0118338	1.20812e-06	14306	ebi-a-GCST90017026	rs2882478	A	G	0.5447	|| id:ebi-a-GCST90017026	TRUE	reported	igd	23.7815
	12	24572337	0.109724	0.024221	4.86508e-06	14306	ebi-a-GCST90017026	rs35182105	G	A	0.9274	|| id:ebi-a-GCST90017026	TRUE	reported	igd	20.522
	3	70324294	0.0592366	0.0132222	9.8451e-06	14306	ebi-a-GCST90017026	rs62256516	G	A	0.3181	|| id:ebi-a-GCST90017026	TRUE	reported	igd	20.0712
	1	65990422	0.05436	0.011947	5.56775e-06	14306	ebi-a-GCST90017026	rs6656451	T	C	0.5606	|| id:ebi-a-GCST90017026	TRUE	reported	igd	20.7034
	3	154242406	0.108441	0.023825	5.77218e-06	14306	ebi-a-GCST90017026	rs7629954	A	G	0.0686	|| id:ebi-a-GCST90017026	TRUE	reported	igd	20.7167
genus Lachnospira id.2004	chr.exposure	pos.exposure	beta.exposure	se.exposure	pval.exposure	samplesize.exposure	id.exposure	SNP	effect_allele.exposure	other_allele.exposure	eaf.exposure	exposure	mr_keep.exposure	pval_origin.exposure	data_source.exposure	F Value
	2	57701660	0.051823	0.0110697	2.9282e-06	14306	ebi-a-GCST90017029	rs56791201	T	C	0.4573	|| id:ebi-a-GCST90017029	TRUE	reported	igd	21.9166
	chr.exposure	pos.exposure	beta.exposure	se.exposure	pval.exposure	samplesize.exposure	id.exposure	SNP	effect_allele.exposure	other_allele.exposure	eaf.exposure	exposure	mr_keep.exposure	pval_origin.exposure	data_source.exposure	F Value
	11	19572557	0.0973842	0.0194791	7.68652e-07	14306	ebi-a-GCST90017027	rs10741777	C	T	0.7386	|| id:ebi-a-GCST90017027	TRUE	reported	igd	24.9942
	11	74391775	0.0974344	0.0181279	9.34932e-08	14306	ebi-a-GCST90017027	rs10793103	C	T	0.3042	|| id:ebi-a-GCST90017027	TRUE	reported	igd	28.8888
	1	90818872	0.117029	0.0243085	1.4003e-06	14306	ebi-a-GCST90017027	rs10801803	A	G	0.838	|| id:ebi-a-GCST90017027	TRUE	reported	igd	23.1777
	2	168628871	0.0798769	0.0168846	2.29166e-06	14306	ebi-a-GCST90017027	rs13024781	C	T	0.497	|| id:ebi-a-GCST90017027	TRUE	reported	igd	22.38
	6	81214803	0.110443	0.0235801	2.85825e-06	14306	ebi-a-GCST90017027	rs57091572	G	A	0.8598	|| id:ebi-a-GCST90017027	TRUE	reported	igd	21.9374
genus Lachnospiraceae UCG008 id.11328	8	23071054	0.0886512	0.0199045	6.92054e-06	14306	ebi-a-GCST90017027	rs57254474	G	A	0.2406	|| id:ebi-a-GCST90017027	TRUE	reported	igd	19.8366
	12	129539818	0.179838	0.0393797	6.34118e-06	14306	ebi-a-GCST90017027	rs61944774	A	G	0.0577	|| id:ebi-a-GCST90017027	TRUE	reported	igd	20.8554
	2	228100140	0.102292	0.0212319	1.58891e-06	14306	ebi-a-GCST90017027	rs62277846	C	T	0.2356	|| id:ebi-a-GCST90017027	TRUE	reported	igd	23.2116
	4	114220647	0.0845848	0.0170693	7.68192e-07	14306	ebi-a-GCST90017027	rs67078837	C	T	0.5417	|| id:ebi-a-GCST90017027	TRUE	reported	igd	24.5558
	15	31697284	0.136523	0.0303128	9.83196e-06	14306	ebi-a-GCST90017027	rs75356640	G	A	0.0885	|| id:ebi-a-GCST90017027	TRUE	reported	igd	20.2843
	16	84992314	0.112064	0.0228369	1.80992e-06	14306	ebi-a-GCST90017027	rs955844	A	C	0.1998	|| id:ebi-a-GCST90017027	TRUE	reported	igd	24.0801
	3	100496680	0.121162	0.0233467	2.4134e-07	14306	ebi-a-GCST90017027	rs9873555	C	G	0.8429	|| id:ebi-a-GCST90017027	TRUE	reported	igd	26.9328
	chr.exposure	pos.exposure	beta.exposure	se.exposure	pval.exposure	samplesize.exposure	id.exposure	SNP	effect_allele.exposure	other_allele.exposure	eaf.exposure	exposure	mr_keep.exposure	pval_origin.exposure	data_source.exposure	F Value
	19	42586245	0.10453	0.0230253	4.23975e-06	14306	ebi-a-GCST90017028	rs10414815	T	C	0.1193	|| id:ebi-a-GCST90017028	TRUE	reported	igd	20.6097
	10	83848397	0.126592	0.024345	4.68954e-07	14306	ebi-a-GCST90017028	rs11192447	A	G	0.0746	|| id:ebi-a-GCST90017028	TRUE	reported	igd	27.0391
	9	92267239	0.0657686	0.0139569	2.70321e-06	14306	ebi-a-GCST90017028	rs12346653	C	T	0.2744	|| id:ebi-a-GCST90017028	TRUE	reported	igd	22.2054
	6	84772845	0.0702357	0.015706	7.84603e-06	14306	ebi-a-GCST90017028	rs17730011	A	G	0.7813	|| id:ebi-a-GCST90017028	TRUE	reported	igd	19.9979
genus Lachnospiraceae UCG010 id.11330	9	85576178	0.0684038	0.0156562	9.17318e-06	14306	ebi-a-GCST90017028	rs2153460	T	A	0.8161	|| id:ebi-a-GCST90017028	TRUE	reported	igd	19.0892
	21	33193567	0.0562148	0.0127763	9.91996e-06	14306	ebi-a-GCST90017028	rs2833528	T	C	0.6392	|| id:ebi-a-GCST90017028	TRUE	reported	igd	19.3594
	5	8146371	0.0779543	0.0171865	7.48411e-06	14306	ebi-a-GCST90017028	rs336138	G	T	0.163	|| id:ebi-a-GCST90017028	TRUE	reported	igd	20.5734
	7	81410263	0.0572001	0.0127043	7.63062e-06	14306	ebi-a-GCST90017028	rs4576377	C	A	0.6163	|| id:ebi-a-GCST90017028	TRUE	reported	igd	20.2718
	1	224897491	0.111884	0.0238893	2.5765e-06	14306	ebi-a-GCST90017028	rs72761829	A	T	0.0716	|| id:ebi-a-GCST90017028	TRUE	reported	igd	21.9346
	2	185862591	0.222263	0.0486425	5.68434e-06	14306	ebi-a-GCST90017028	rs72894957	G	A	0.0477	|| id:ebi-a-GCST90017028	TRUE	reported	igd	20.8787
	14	29872341	0.0867262	0.0183477	3.19007e-06	14306	ebi-a-GCST90017028	rs74315802	G	T	0.1213	|| id:ebi-a-GCST90017028	TRUE	reported	igd	22.3428
	21	44079875	0.0655062	0.0131994	9.96369e-07	14306	ebi-a-GCST90017028	rs9981767	A	C	0.3161	|| id:ebi-a-GCST90017028	TRUE	reported	igd	24.6295
	chr.exposure	pos.exposure	beta.exposure	se.exposure	pval.exposure	samplesize.exposure	id.exposure	SNP	effect_allele.exposure	other_allele.exposure	eaf.exposure	exposure	mr_keep.exposure	pval_origin.exposure	data_source.exposure	F Value
	2	28903275	0.0852686	0.0176504	1.59199e-06	14306	ebi-a-GCST90017030	rs11674854	T	C	0.5726	|| id:ebi-a-GCST90017030	TRUE	reported	igd	23.3383
	2	199312684	0.0805447	0.0177429	8.96314e-06	14306	ebi-a-GCST90017030	rs12693845	T	C	0.6431	|| id:ebi-a-GCST90017030	TRUE	reported	igd	20.6075
	2	135755629	0.0804001	0.0178207	4.93106e-06	14306	ebi-a-GCST90017030	rs1530559	G	A	0.5676	|| id:ebi-a-GCST90017030	TRUE	reported	igd	20.3547
	1	18501459	0.183147	0.038148	1.27809e-06	14306	ebi-a-GCST90017030	rs16861661	A	G	0.9503	|| id:ebi-a-GCST90017030	TRUE	reported	igd	23.0492
	16	73890910	0.0815092	0.0169441	1.40618e-06	14306	ebi-a-GCST90017030	rs328312	T	A	0.4473	|| id:ebi-a-GCST90017030	TRUE	reported	igd	23.1407
genus Lactobacillus id.1837	20	54192992	0.0801344	0.017149	3.29041e-06	14306	ebi-a-GCST90017030	rs6092149	T	A	0.5567	|| id:ebi-a-GCST90017030	TRUE	reported	igd	21.8354
	4	109896462	0.187692	0.0394585	2.24383e-06	14306	ebi-a-GCST90017030	rs62314653	C	A	0.0626	|| id:ebi-a-GCST90017030	TRUE	reported	igd	22.6261
	13	23834968	0.107134	0.0221883	3.12097e-06	14306	ebi-a-GCST90017030	rs7399658	A	G	0.7843	|| id:ebi-a-GCST90017030	TRUE	reported	igd	23.3135
	6	151027636	0.139784	0.0310414	6.83439e-06	14306	ebi-a-GCST90017030	rs75127669	C	A	0.0706	|| id:ebi-a-GCST90017030	TRUE	reported	igd	20.2783
	8	69010103	0.079195	0.0171791	4.24766e-06	14306	ebi-a-GCST90017030	rs768253	G	T	0.6093	|| id:ebi-a-GCST90017030	TRUE	reported	igd	21.2518
	3	173151665	0.219886	0.0475759	7.32706e-06	14306	ebi-a-GCST90017030	rs77478751	G	A	0.9463	|| id:ebi-a-GCST90017030	TRUE	reported	igd	21.361
	19	6928017	0.0985077	0.0203229	9.71673e-07	14306	ebi-a-GCST90017030	rs921925	A	C	0.2624	|| id:ebi-a-GCST90017030	TRUE	reported	igd	23.4947
	chr.exposure	pos.exposure	beta.exposure	se.exposure	pval.exposure	samplesize.exposure	id.exposure	SNP	effect_allele.exposure	other_allele.exposure	eaf.exposure	exposure	mr_keep.exposure	pval_origin.exposure	data_source.exposure	F Value
	19	28767353	0.118306	0.024522	1.28677e-06	14306	ebi-a-GCST90017031	rs10417872	T	G	0.2584	|| id:ebi-a-GCST90017031	TRUE	reported	igd	23.2756
	17	2699935	0.13671	0.0274694	1.26561e-06	14306	ebi-a-GCST90017031	rs123059	C	T	0.7783	|| id:ebi-a-GCST90017031	TRUE	reported	igd	24.7686
	2	31266049	0.108423	0.0239978	6.6083e-06	14306	ebi-a-GCST90017031	rs12621813	G	A	0.2823	|| id:ebi-a-GCST90017031	TRUE	reported	igd	20.4127
	7	14650221	0.191857	0.0424761	6.28608e-06	14306	ebi-a-GCST90017031	rs17168302	G	A	0.0656	|| id:ebi-a-GCST90017031	TRUE	reported	igd	20.4017
	2	54114864	0.199221	0.0430969	1.39592e-06	14306	ebi-a-GCST90017031	rs2293361	T	C	0.9354	|| id:ebi-a-GCST90017031	TRUE	reported	igd	21.3687
	18	64699550	0.122294	0.0228976	8.95035e-08	14306	ebi-a-GCST90017031	rs34757988	G	C	0.326	|| id:ebi-a-GCST90017031	TRUE	reported	igd	28.5253
genus Lactococcus id.1851	12	113161438	0.114599	0.023839	2.06144e-06	14306	ebi-a-GCST90017031	rs4766997	C	T	0.2962	|| id:ebi-a-GCST90017031	TRUE	reported	igd	23.1092
	10	71518643	0.146426	0.0307367	2.36211e-06	14306	ebi-a-GCST90017031	rs55910161	C	T	0.1352	|| id:ebi-a-GCST90017031	TRUE	reported	igd	22.6946
	1	116887742	0.200758	0.0442121	6.1776e-06	14306	ebi-a-GCST90017031	rs6674304	C	T	0.0686	|| id:ebi-a-GCST90017031	TRUE	reported	igd	20.6188
	22	31532568	0.140799	0.027582	4.36878e-07	14306	ebi-a-GCST90017031	rs757872	G	C	0.2058	|| id:ebi-a-GCST90017031	TRUE	reported	igd	26.0584
	13	113472525	0.104232	0.0230786	4.44723e-06	14306	ebi-a-GCST90017031	rs7992246	T	C	0.3469	|| id:ebi-a-GCST90017031	TRUE	reported	igd	20.3978
	chr.exposure	pos.exposure	beta.exposure	se.exposure	pval.exposure	samplesize.exposure	id.exposure	SNP	effect_allele.exposure	other_allele.exposure	eaf.exposure	exposure	mr_keep.exposure	pval_origin.exposure	data_source.exposure	F Value
	13	86079090	0.119479	0.0271688	7.80171e-06	14306	ebi-a-GCST90017032	rs11620597	T	C	0.0527	|| id:ebi-a-GCST90017032	TRUE	reported	igd	19.3394
	16	5938448	0.060618	0.0131551	4.14753e-06	14306	ebi-a-GCST90017032	rs11645029	C	G	0.5477	|| id:ebi-a-GCST90017032	TRUE	reported	igd	21.2332
	1	58441860	0.0935456	0.0193174	2.02428e-06	14306	ebi-a-GCST90017032	rs1187983	T	C	0.8777	|| id:ebi-a-GCST90017032	TRUE	reported	igd	23.4504
	18	46255637	0.059681	0.0132289	6.60374e-06	14306	ebi-a-GCST90017032	rs12963345	C	G	0.5417	|| id:ebi-a-GCST90017032	TRUE	reported	igd	20.3528
	19	4542097	0.118845	0.0268423	6.86294e-06	14306	ebi-a-GCST90017032	rs146541147	G	A	0.0706	|| id:ebi-a-GCST90017032	TRUE	reported	igd	19.603
	10	12516924	0.0840769	0.0167551	6.28449e-07	14306	ebi-a-GCST90017032	rs2724813	G	A	0.7992	|| id:ebi-a-GCST90017032	TRUE	reported	igd	25.1802
genus Marvinbryantia id.2005	6	132881664	0.0649396	0.0131146	7.25371e-07	14306	ebi-a-GCST90017032	rs2842896	T	C	0.4722	|| id:ebi-a-GCST90017032	TRUE	reported	igd	24.5194
	3	166039765	0.0634861	0.0136323	3.11279e-06	14306	ebi-a-GCST90017032	rs2863363	A	G	0.3678	|| id:ebi-a-GCST90017032	TRUE	reported	igd	21.688
	1	211400180	0.0679323	0.015012	5.02736e-06	14306	ebi-a-GCST90017032	rs3125832	A	C	0.2624	|| id:ebi-a-GCST90017032	TRUE	reported	igd	20.4774
	11	45826561	0.124426	0.0248431	1.01163e-06	14306	ebi-a-GCST90017032	rs61884471	G	A	0.0845	|| id:ebi-a-GCST90017032	TRUE	reported	igd	25.0848
	11	79518683	0.126354	0.0272212	3.25912e-06	14306	ebi-a-GCST90017032	rs72948274	C	A	0.9423	|| id:ebi-a-GCST90017032	TRUE	reported	igd	21.5458
	14	21577837	0.0952415	0.0216699	6.58082e-06	14306	ebi-a-GCST90017032	rs8006832	T	G	0.8887	|| id:ebi-a-GCST90017032	TRUE	reported	igd	19.317
	chr.exposure	pos.exposure	beta.exposure	se.exposure	pval.exposure	samplesize.exposure	id.exposure	SNP	effect_allele.exposure	other_allele.exposure	eaf.exposure	exposure	mr_keep.exposure	pval_origin.exposure	data_source.exposure	F Value
	2	125440268	0.112811	0.0239106	3.08546e-06	14306	ebi-a-GCST90017033	rs10202904	G	T	0.5328	|| id:ebi-a-GCST90017033	TRUE	reported	igd	22.2598
	11	89349287	0.113013	0.0254343	7.03105e-06	14306	ebi-a-GCST90017033	rs11018665	A	T	0.341	|| id:ebi-a-GCST90017033	TRUE	reported	igd	19.7432
	10	112266046	0.115197	0.0255492	7.61377e-06	14306	ebi-a-GCST90017033	rs1334944	T	C	0.2853	|| id:ebi-a-GCST90017033	TRUE	reported	igd	20.3295
genus Methanobrevibacter id.123	15	31516919	0.109639	0.0247979	9.28282e-06	14306	ebi-a-GCST90017033	rs4779844	G	C	0.3241	|| id:ebi-a-GCST90017033	TRUE	reported	igd	19.5479
	19	52925820	0.135628	0.0308139	9.73823e-06	14306	ebi-a-GCST90017033	rs4802933	G	A	0.8221	|| id:ebi-a-GCST90017033	TRUE	reported	igd	19.3734
	3	15053083	0.188956	0.0419905	8.04896e-06	14306	ebi-a-GCST90017033	rs6776814	C	T	0.9105	|| id:ebi-a-GCST90017033	TRUE	reported	igd	20.2497
	13	41963791	0.222849	0.0454319	1.07552e-06	14306	ebi-a-GCST90017033	rs76029318	T	C	0.0646	|| id:ebi-a-GCST90017033	TRUE	reported	igd	24.0602
	4	104418307	0.214213	0.0456045	3.81566e-06	14306	ebi-a-GCST90017033	rs894996	C	A	0.0716	|| id:ebi-a-GCST90017033	TRUE	reported	igd	22.0636
	chr.exposure	pos.exposure	beta.exposure	se.exposure	pval.exposure	samplesize.exposure	id.exposure	SNP	effect_allele.exposure	other_allele.exposure	eaf.exposure	exposure	mr_keep.exposure	pval_origin.exposure	data_source.exposure	F Value
	8	1266824	0.0577795	0.0125389	3.67443e-06	14306	ebi-a-GCST90017034	rs10093869	G	A	0.6243	|| id:ebi-a-GCST90017034	TRUE	reported	igd	21.2338
	19	49523088	0.0550695	0.0121164	6.5793e-06	14306	ebi-a-GCST90017034	rs10423795	C	T	0.4066	|| id:ebi-a-GCST90017034	TRUE	reported	igd	20.6574
	11	6848360	0.0999781	0.0223785	8.85054e-06	14306	ebi-a-GCST90017034	rs16918425	A	T	0.0746	|| id:ebi-a-GCST90017034	TRUE	reported	igd	19.9594
	14	70944224	0.0726896	0.0161372	3.68036e-06	14306	ebi-a-GCST90017034	rs28417404	G	A	0.831	|| id:ebi-a-GCST90017034	TRUE	reported	igd	20.2903
genus Odoribacter id.952	17	46763962	0.0576329	0.0129154	6.02698e-06	14306	ebi-a-GCST90017034	rs4793970	G	A	0.6988	|| id:ebi-a-GCST90017034	TRUE	reported	igd	19.9125
	15	58063881	0.0618294	0.0118887	2.07625e-07	14306	ebi-a-GCST90017034	rs503751	C	G	0.5199	|| id:ebi-a-GCST90017034	TRUE	reported	igd	27.0471
	4	11907559	0.0881922	0.0194146	6.05954e-06	14306	ebi-a-GCST90017034	rs6856150	G	A	0.1183	|| id:ebi-a-GCST90017034	TRUE	reported	igd	20.635
	8	69677480	0.121449	0.0264106	9.48681e-06	14306	ebi-a-GCST90017034	rs74553962	T	G	0.0626	|| id:ebi-a-GCST90017034	TRUE	reported	igd	21.1462
	12	67655943	0.133489	0.0268526	6.56251e-07	14306	ebi-a-GCST90017034	rs77779484	A	G	0.9414	|| id:ebi-a-GCST90017034	TRUE	reported	igd	24.7126
	chr.exposure	pos.exposure	beta.exposure	se.exposure	pval.exposure	samplesize.exposure	id.exposure	SNP	effect_allele.exposure	other_allele.exposure	eaf.exposure	exposure	mr_keep.exposure	pval_origin.exposure	data_source.exposure	F Value
	2	150077190	0.108148	0.0236848	4.85501e-06	14306	ebi-a-GCST90017035	rs1035588	G	A	0.6173	|| id:ebi-a-GCST90017035	TRUE	reported	igd	20.8496
	10	10777085	0.140434	0.0295602	2.19842e-06	14306	ebi-a-GCST90017035	rs17148768	G	A	0.2117	|| id:ebi-a-GCST90017035	TRUE	reported	igd	22.5699
	1	231960352	0.111131	0.0237218	3.43202e-06	14306	ebi-a-GCST90017035	rs2759329	A	G	0.66	|| id:ebi-a-GCST90017035	TRUE	reported	igd	21.947
	1	247642270	0.223604	0.0482391	3.87044e-06	14306	ebi-a-GCST90017035	rs35225860	G	A	0.9433	|| id:ebi-a-GCST90017035	TRUE	reported	igd	21.4863
	20	19969568	0.122938	0.0269928	4.48456e-06	14306	ebi-a-GCST90017035	rs6046522	C	T	0.2863	|| id:ebi-a-GCST90017035	TRUE	reported	igd	20.7432
genus Olsenella id.822	4	174810498	0.104783	0.0231343	6.43724e-06	14306	ebi-a-GCST90017035	rs61090148	G	A	0.5775	|| id:ebi-a-GCST90017035	TRUE	reported	igd	20.5149
	19	4925018	0.19943	0.0407033	1.1882e-06	14306	ebi-a-GCST90017035	rs62112538	T	C	0.9195	|| id:ebi-a-GCST90017035	TRUE	reported	igd	24.0061
	9	21884425	0.249079	0.0520814	2.95291e-06	14306	ebi-a-GCST90017035	rs72691585	A	C	0.9314	|| id:ebi-a-GCST90017035	TRUE	reported	igd	22.8723
	1	179629191	0.108044	0.023638	5.32023e-06	14306	ebi-a-GCST90017035	rs7540303	C	T	0.4215	|| id:ebi-a-GCST90017035	TRUE	reported	igd	20.892
	17	59632873	0.106529	0.0240379	9.70085e-06	14306	ebi-a-GCST90017035	rs8066522	A	G	0.6531	|| id:ebi-a-GCST90017035	TRUE	reported	igd	19.6401
	6	10422207	0.119966	0.0268645	7.2835e-06	14306	ebi-a-GCST90017035	rs9460691	C	A	0.2167	|| id:ebi-a-GCST90017035	TRUE	reported	igd	19.9415
	chr.exposure	pos.exposure	beta.exposure	se.exposure	pval.exposure	samplesize.exposure	id.exposure	SNP	effect_allele.exposure	other_allele.exposure	eaf.exposure	exposure	mr_keep.exposure	pval_origin.exposure	data_source.exposure	F Value
	14	21479605	0.143961	0.0290223	1.00921e-06	14306	ebi-a-GCST90017036	rs11627628	T	C	0.0726	|| id:ebi-a-GCST90017036	TRUE	reported	igd	24.6052
	8	11116314	0.0824934	0.0180457	4.94299e-06	14306	ebi-a-GCST90017036	rs11990279	C	T	0.7604	|| id:ebi-a-GCST90017036	TRUE	reported	igd	20.8973
	11	25973451	0.0785431	0.0174075	6.02629e-06	14306	ebi-a-GCST90017036	rs12417956	C	G	0.2445	|| id:ebi-a-GCST90017036	TRUE	reported	igd	20.3584
	4	3656291	0.121589	0.0259612	4.09383e-06	14306	ebi-a-GCST90017036	rs12649930	T	G	0.0944	|| id:ebi-a-GCST90017036	TRUE	reported	igd	21.9351
	22	44834707	0.0795527	0.0162411	1.1472e-06	14306	ebi-a-GCST90017036	rs133832	C	A	0.6869	|| id:ebi-a-GCST90017036	TRUE	reported	igd	23.9927
	12	82366390	0.174992	0.0388394	4.61987e-06	14306	ebi-a-GCST90017036	rs137917150	A	T	0.9384	|| id:ebi-a-GCST90017036	TRUE	reported	igd	20.2998
	2	179457147	0.0988765	0.0208795	3.07822e-06	14306	ebi-a-GCST90017036	rs16866406	A	G	0.1392	|| id:ebi-a-GCST90017036	TRUE	reported	igd	22.4257
genus Oscillibacter id.2063	9	1798324	0.129568	0.028157	4.38036e-06	14306	ebi-a-GCST90017036	rs16934185	G	A	0.8956	|| id:ebi-a-GCST90017036	TRUE	reported	igd	21.175
	1	184942671	0.0749553	0.0152632	9.16326e-07	14306	ebi-a-GCST90017036	rs234108	A	G	0.4801	|| id:ebi-a-GCST90017036	TRUE	reported	igd	24.1165
	14	32270129	0.0752368	0.0156861	1.39627e-06	14306	ebi-a-GCST90017036	rs36095275	T	C	0.6382	|| id:ebi-a-GCST90017036	TRUE	reported	igd	23.0054
	8	21598077	0.0711323	0.0152261	3.20826e-06	14306	ebi-a-GCST90017036	rs4506202	G	A	0.4841	|| id:ebi-a-GCST90017036	TRUE	reported	igd	21.8251
	11	79013843	0.101351	0.0221016	3.38712e-06	14306	ebi-a-GCST90017036	rs61883564	G	A	0.8757	|| id:ebi-a-GCST90017036	TRUE	reported	igd	21.0285
	20	18003390	0.0681423	0.0151349	6.59888e-06	14306	ebi-a-GCST90017036	rs62206502	A	C	0.5408	|| id:ebi-a-GCST90017036	TRUE	reported	igd	20.271
	6	36931994	0.0855032	0.018693	6.20955e-06	14306	ebi-a-GCST90017036	rs6901560	C	G	0.1988	|| id:ebi-a-GCST90017036	TRUE	reported	igd	20.9222
	10	116469806	0.12212	0.0268629	5.34737e-06	14306	ebi-a-GCST90017036	rs75453768	G	T	0.0865	|| id:ebi-a-GCST90017036	TRUE	reported	igd	20.6665
	20	49507892	0.17664	0.0388812	2.0384e-06	14306	ebi-a-GCST90017036	rs761240	G	T	0.9334	|| id:ebi-a-GCST90017036	TRUE	reported	igd	20.6395
	chr.exposure	pos.exposure	beta.exposure	se.exposure	pval.exposure	samplesize.exposure	id.exposure	SNP	effect_allele.exposure	other_allele.exposure	eaf.exposure	exposure	mr_keep.exposure	pval_origin.exposure	data_source.exposure	F Value
	6	18093691	0.133016	0.0269733	1.04222e-06	14306	ebi-a-GCST90017037	rs12206468	A	G	0.9364	|| id:ebi-a-GCST90017037	TRUE	reported	igd	24.3187
	16	89792856	0.13559	0.030678	9.31022e-06	14306	ebi-a-GCST90017037	rs12925026	T	C	0.0726	|| id:ebi-a-GCST90017037	TRUE	reported	igd	19.5345
	14	28151415	0.0826246	0.0175252	2.26772e-06	14306	ebi-a-GCST90017037	rs1954532	C	T	0.7913	|| id:ebi-a-GCST90017037	TRUE	reported	igd	22.2276
genus Oscillospira id.2064	4	89483300	0.114051	0.0252838	3.36589e-06	14306	ebi-a-GCST90017037	rs28889936	A	C	0.1083	|| id:ebi-a-GCST90017037	TRUE	reported	igd	20.3476
	6	170474630	0.0898456	0.0198088	6.46755e-06	14306	ebi-a-GCST90017037	rs62422654	C	T	0.1471	|| id:ebi-a-GCST90017037	TRUE	reported	igd	20.572
	6	56160483	0.130569	0.0281674	5.62704e-06	14306	ebi-a-GCST90017037	rs72866977	C	A	0.9304	|| id:ebi-a-GCST90017037	TRUE	reported	igd	21.4875
	3	172373615	0.08321	0.0168666	1.09428e-06	14306	ebi-a-GCST90017037	rs73038677	A	T	0.8181	|| id:ebi-a-GCST90017037	TRUE	reported	igd	24.3386
	1	76803093	0.0774322	0.0172216	6.85125e-06	14306	ebi-a-GCST90017037	rs751183	C	T	0.7545	|| id:ebi-a-GCST90017037	TRUE	reported	igd	20.216
	17	14881860	0.0715392	0.0156539	5.61319e-06	14306	ebi-a-GCST90017037	rs8076323	A	G	0.2575	|| id:ebi-a-GCST90017037	TRUE	reported	igd	20.8854
	chr.exposure	pos.exposure	beta.exposure	se.exposure	pval.exposure	samplesize.exposure	id.exposure	SNP	effect_allele.exposure	other_allele.exposure	eaf.exposure	exposure	mr_keep.exposure	pval_origin.exposure	data_source.exposure	F Value
	8	20902693	0.137691	0.0294804	3.29754e-06	14306	ebi-a-GCST90017038	rs10464997	G	A	0.1531	|| id:ebi-a-GCST90017038	TRUE	reported	igd	21.8145
	12	96819204	0.199099	0.0427327	3.74283e-06	14306	ebi-a-GCST90017038	rs11108500	G	A	0.9235	|| id:ebi-a-GCST90017038	TRUE	reported	igd	21.7079
	15	93941937	0.213114	0.047162	7.29861e-06	14306	ebi-a-GCST90017038	rs111966731	T	C	0.0716	|| id:ebi-a-GCST90017038	TRUE	reported	igd	20.4192
	9	19682558	0.217122	0.0466317	1.41504e-06	14306	ebi-a-GCST90017038	rs12002250	A	C	0.0596	|| id:ebi-a-GCST90017038	TRUE	reported	igd	21.6793
	6	38550301	0.138078	0.0296981	3.64502e-06	14306	ebi-a-GCST90017038	rs1569853	C	T	0.8618	|| id:ebi-a-GCST90017038	TRUE	reported	igd	21.6168
	4	189935314	0.207847	0.0421439	8.79812e-07	14306	ebi-a-GCST90017038	rs36057338	G	T	0.0755	|| id:ebi-a-GCST90017038	TRUE	reported	igd	24.3231
genus Oxalobacter id.2978	11	126582578	0.172142	0.0394026	9.18692e-06	14306	ebi-a-GCST90017038	rs3862635	T	C	0.9215	|| id:ebi-a-GCST90017038	TRUE	reported	igd	19.0864
	3	171947435	0.130293	0.0242237	7.51069e-08	14306	ebi-a-GCST90017038	rs4428215	G	A	0.2604	|| id:ebi-a-GCST90017038	TRUE	reported	igd	28.9309
	22	37421469	0.130992	0.0253804	2.06054e-07	14306	ebi-a-GCST90017038	rs6000536	T	C	0.7893	|| id:ebi-a-GCST90017038	TRUE	reported	igd	26.6374
	20	59502888	0.105512	0.021489	1.07431e-06	14306	ebi-a-GCST90017038	rs6071435	A	T	0.6362	|| id:ebi-a-GCST90017038	TRUE	reported	igd	24.1086
	8	115560689	0.127217	0.0278855	7.12771e-06	14306	ebi-a-GCST90017038	rs6993398	G	A	0.1531	|| id:ebi-a-GCST90017038	TRUE	reported	igd	20.8129
	9	87514407	0.117882	0.0211262	2.57472e-08	14306	ebi-a-GCST90017038	rs736744	C	T	0.4155	|| id:ebi-a-GCST90017038	TRUE	reported	igd	31.1352
	chr.exposure	pos.exposure	beta.exposure	se.exposure	pval.exposure	samplesize.exposure	id.exposure	SNP	effect_allele.exposure	other_allele.exposure	eaf.exposure	exposure	mr_keep.exposure	pval_origin.exposure	data_source.exposure	F Value
	3	52354847	0.186478	0.0405199	5.65484e-06	14306	ebi-a-GCST90017039	rs114567323	T	C	0.0467	|| id:ebi-a-GCST90017039	TRUE	reported	igd	21.1796
	3	191572365	0.10308	0.0222736	1.93059e-06	14306	ebi-a-GCST90017039	rs115602804	G	A	0.0666	|| id:ebi-a-GCST90017039	TRUE	reported	igd	21.4175
	6	165969505	0.162824	0.0381863	8.86584e-06	14306	ebi-a-GCST90017039	rs11965579	G	C	0.0348	|| id:ebi-a-GCST90017039	TRUE	reported	igd	18.1812
	16	7045276	0.0500303	0.0111459	7.27411e-06	14306	ebi-a-GCST90017039	rs17141986	G	C	0.4274	|| id:ebi-a-GCST90017039	TRUE	reported	igd	20.1482
	5	169360155	0.0558784	0.0116625	1.71325e-06	14306	ebi-a-GCST90017039	rs3860755	G	C	0.3082	|| id:ebi-a-GCST90017039	TRUE	reported	igd	22.9564
genus Parabacteroides id.954	6	47368687	0.0761961	0.0157042	1.93143e-06	14306	ebi-a-GCST90017039	rs4236095	G	A	0.1252	|| id:ebi-a-GCST90017039	TRUE	reported	igd	23.5415
	9	2217340	0.0702667	0.0142249	5.7069e-07	14306	ebi-a-GCST90017039	rs60884758	T	C	0.835	|| id:ebi-a-GCST90017039	TRUE	reported	igd	24.4006
	1	85585609	0.10452	0.0225521	9.75708e-06	14306	ebi-a-GCST90017039	rs6657302	C	T	0.9483	|| id:ebi-a-GCST90017039	TRUE	reported	igd	21.4795
	2	38037203	0.0715594	0.0156668	8.83385e-06	14306	ebi-a-GCST90017039	rs72893646	T	A	0.8718	|| id:ebi-a-GCST90017039	TRUE	reported	igd	20.8628
	12	56396953	0.0888832	0.0200902	8.53631e-06	14306	ebi-a-GCST90017039	rs7298818	C	T	0.0765	|| id:ebi-a-GCST90017039	TRUE	reported	igd	19.5736
	chr.exposure	pos.exposure	beta.exposure	se.exposure	pval.exposure	samplesize.exposure	id.exposure	SNP	effect_allele.exposure	other_allele.exposure	eaf.exposure	exposure	mr_keep.exposure	pval_origin.exposure	data_source.exposure	F Value
	12	25249743	0.0758215	0.0172568	6.59721e-06	14306	ebi-a-GCST90017040	rs10842464	C	T	0.5815	|| id:ebi-a-GCST90017040	TRUE	reported	igd	19.3048
	3	149298792	0.162376	0.0354178	2.1112e-06	14306	ebi-a-GCST90017040	rs140997932	C	T	0.9354	|| id:ebi-a-GCST90017040	TRUE	reported	igd	21.0184
	11	114526679	0.12465	0.0262323	4.03005e-06	14306	ebi-a-GCST90017040	rs145020347	G	A	0.8608	|| id:ebi-a-GCST90017040	TRUE	reported	igd	22.5794
	12	71978728	0.0988335	0.0216172	6.75274e-06	14306	ebi-a-GCST90017040	rs17109926	G	A	0.8121	|| id:ebi-a-GCST90017040	TRUE	reported	igd	20.903
	6	83459314	0.248065	0.0524304	1.92659e-06	14306	ebi-a-GCST90017040	rs17785622	A	G	0.0596	|| id:ebi-a-GCST90017040	TRUE	reported	igd	22.3854
	5	174606261	0.122561	0.0236507	2.63797e-07	14306	ebi-a-GCST90017040	rs2081023	G	A	0.8976	|| id:ebi-a-GCST90017040	TRUE	reported	igd	26.8545
genus Paraprevotella id.962	1	195971173	0.10572	0.0227246	4.35993e-06	14306	ebi-a-GCST90017040	rs3008582	T	C	0.1322	|| id:ebi-a-GCST90017040	TRUE	reported	igd	21.6432
	7	81759508	0.0779721	0.0171691	5.20176e-06	14306	ebi-a-GCST90017040	rs3801748	G	A	0.3459	|| id:ebi-a-GCST90017040	TRUE	reported	igd	20.6245
	11	41079703	0.138905	0.0289897	3.81751e-06	14306	ebi-a-GCST90017040	rs4756632	T	G	0.9066	|| id:ebi-a-GCST90017040	TRUE	reported	igd	22.9588
	12	114131978	0.0882466	0.018382	2.14358e-06	14306	ebi-a-GCST90017040	rs4767113	C	T	0.2873	|| id:ebi-a-GCST90017040	TRUE	reported	igd	23.0468
	18	69623804	0.10229	0.0226948	5.95895e-06	14306	ebi-a-GCST90017040	rs7240324	G	T	0.8091	|| id:ebi-a-GCST90017040	TRUE	reported	igd	20.3149
	13	86162420	0.106692	0.0220264	6.9274e-07	14306	ebi-a-GCST90017040	rs9602779	C	A	0.827	|| id:ebi-a-GCST90017040	TRUE	reported	igd	23.4626
	17	69135631	0.0852967	0.0175212	1.14067e-06	14306	ebi-a-GCST90017040	rs9900242	G	A	0.6392	|| id:ebi-a-GCST90017040	TRUE	reported	igd	23.6994
	chr.exposure	pos.exposure	beta.exposure	se.exposure	pval.exposure	samplesize.exposure	id.exposure	SNP	effect_allele.exposure	other_allele.exposure	eaf.exposure	exposure	mr_keep.exposure	pval_origin.exposure	data_source.exposure	F Value
	10	44293839	0.0717102	0.0148151	1.15271e-06	14306	ebi-a-GCST90017041	rs10899911	G	A	0.7276	|| id:ebi-a-GCST90017041	TRUE	reported	igd	23.4289
	3	30163689	0.0662952	0.0146114	6.22917e-06	14306	ebi-a-GCST90017041	rs11715853	A	G	0.6859	|| id:ebi-a-GCST90017041	TRUE	reported	igd	20.5864
	12	126498824	0.0756729	0.0159035	2.75518e-06	14306	ebi-a-GCST90017041	rs1403396	T	A	0.7853	|| id:ebi-a-GCST90017041	TRUE	reported	igd	22.641
	6	137615592	0.0840967	0.0177315	2.89714e-06	14306	ebi-a-GCST90017041	rs2090816	A	C	0.1571	|| id:ebi-a-GCST90017041	TRUE	reported	igd	22.494
	20	25599776	0.0681778	0.0134756	5.38481e-07	14306	ebi-a-GCST90017041	rs2387977	C	T	0.5417	|| id:ebi-a-GCST90017041	TRUE	reported	igd	25.597
	8	114804024	0.109554	0.0235433	3.3485e-06	14306	ebi-a-GCST90017041	rs35055552	T	C	0.0775	|| id:ebi-a-GCST90017041	TRUE	reported	igd	21.6532
	4	15565736	0.0684946	0.0142143	1.51206e-06	14306	ebi-a-GCST90017041	rs35414597	A	T	0.661	|| id:ebi-a-GCST90017041	TRUE	reported	igd	23.22
genus Parasutterella id.2892	17	14692867	0.104458	0.0228089	2.87071e-06	14306	ebi-a-GCST90017041	rs55877868	C	A	0.9036	|| id:ebi-a-GCST90017041	TRUE	reported	igd	20.9737
	3	156550415	0.229468	0.0502262	5.88383e-06	14306	ebi-a-GCST90017041	rs62273907	A	G	0.0497	|| id:ebi-a-GCST90017041	TRUE	reported	igd	20.8729
	3	193896709	0.0684957	0.0150892	8.13355e-06	14306	ebi-a-GCST90017041	rs6809952	A	G	0.7266	|| id:ebi-a-GCST90017041	TRUE	reported	igd	20.606
	4	65556925	0.0636852	0.0132645	1.78328e-06	14306	ebi-a-GCST90017041	rs6828768	C	T	0.5	|| id:ebi-a-GCST90017041	TRUE	reported	igd	23.0513
	12	5275540	0.0646859	0.0134256	1.32776e-06	14306	ebi-a-GCST90017041	rs7303158	C	T	0.4423	|| id:ebi-a-GCST90017041	TRUE	reported	igd	23.2141
	12	53260710	0.0617522	0.0136438	5.92052e-06	14306	ebi-a-GCST90017041	rs7311004	C	T	0.6243	|| id:ebi-a-GCST90017041	TRUE	reported	igd	20.4849
	2	72235444	0.066273	0.0132736	6.31699e-07	14306	ebi-a-GCST90017041	rs7572229	G	A	0.4901	|| id:ebi-a-GCST90017041	TRUE	reported	igd	24.9285
	2	178954708	0.146315	0.0297119	1.57438e-06	14306	ebi-a-GCST90017041	rs78383039	C	T	0.9334	|| id:ebi-a-GCST90017041	TRUE	reported	igd	24.2503
	15	67316307	0.0618345	0.0133	3.62093e-06	14306	ebi-a-GCST90017041	rs8039785	T	G	0.4523	|| id:ebi-a-GCST90017041	TRUE	reported	igd	21.6152
	8	16674526	0.0713448	0.0156958	4.95291e-06	14306	ebi-a-GCST90017041	rs823424	A	G	0.7903	|| id:ebi-a-GCST90017041	TRUE	reported	igd	20.6613
	chr.exposure	pos.exposure	beta.exposure	se.exposure	pval.exposure	samplesize.exposure	id.exposure	SNP	effect_allele.exposure	other_allele.exposure	eaf.exposure	exposure	mr_keep.exposure	pval_origin.exposure	data_source.exposure	F Value
	4	35358594	0.121167	0.0225844	1.23637e-07	14306	ebi-a-GCST90017042	rs10031059	C	T	0.7793	|| id:ebi-a-GCST90017042	TRUE	reported	igd	28.784
	10	78716030	0.195611	0.0392217	1.32859e-06	14306	ebi-a-GCST90017042	rs11001941	A	G	0.9324	|| id:ebi-a-GCST90017042	TRUE	reported	igd	24.8733
	11	4019788	0.17402	0.0374133	3.1299e-06	14306	ebi-a-GCST90017042	rs11030569	T	A	0.9225	|| id:ebi-a-GCST90017042	TRUE	reported	igd	21.6345
	1	216223782	0.16763	0.0379501	9.28346e-06	14306	ebi-a-GCST90017042	rs12069354	C	T	0.0666	|| id:ebi-a-GCST90017042	TRUE	reported	igd	19.5109
	2	33691809	0.0895433	0.0188332	2.14166e-06	14306	ebi-a-GCST90017042	rs2054133	G	A	0.4742	|| id:ebi-a-GCST90017042	TRUE	reported	igd	22.6057
	15	75073172	0.191797	0.0399832	1.83535e-06	14306	ebi-a-GCST90017042	rs34282744	G	C	0.0616	|| id:ebi-a-GCST90017042	TRUE	reported	igd	23.0106
	20	43118017	0.14067	0.030628	6.98715e-06	14306	ebi-a-GCST90017042	rs36121075	G	A	0.8718	|| id:ebi-a-GCST90017042	TRUE	reported	igd	21.0943
	14	57985112	0.110229	0.0237523	3.30088e-06	14306	ebi-a-GCST90017042	rs413827	G	A	0.2127	|| id:ebi-a-GCST90017042	TRUE	reported	igd	21.5368
genus Peptococcus id.2037	22	50973113	0.162018	0.0356813	3.21959e-06	14306	ebi-a-GCST90017042	rs5770862	T	C	0.0666	|| id:ebi-a-GCST90017042	TRUE	reported	igd	20.6179
	6	99020289	0.135311	0.0289742	1.14731e-06	14306	ebi-a-GCST90017042	rs6918730	G	A	0.0974	|| id:ebi-a-GCST90017042	TRUE	reported	igd	21.8094
	9	104595848	0.090152	0.018995	2.21958e-06	14306	ebi-a-GCST90017042	rs7033353	T	G	0.4195	|| id:ebi-a-GCST90017042	TRUE	reported	igd	22.5254
	11	968356	0.134304	0.0300423	5.74156e-06	14306	ebi-a-GCST90017042	rs72850165	C	T	0.8917	|| id:ebi-a-GCST90017042	TRUE	reported	igd	19.9853
	1	75971700	0.137957	0.0302965	8.55342e-06	14306	ebi-a-GCST90017042	rs74592222	G	A	0.1173	|| id:ebi-a-GCST90017042	TRUE	reported	igd	20.7349
	3	17793504	0.181434	0.0319429	1.09883e-08	14306	ebi-a-GCST90017042	rs75754569	C	G	0.1103	|| id:ebi-a-GCST90017042	TRUE	reported	igd	32.2618
	13	89245906	0.175864	0.0387523	5.68316e-06	14306	ebi-a-GCST90017042	rs77614201	C	T	0.9404	|| id:ebi-a-GCST90017042	TRUE	reported	igd	20.5949
	6	162239191	0.0976832	0.0214155	3.50768e-06	14306	ebi-a-GCST90017042	rs7766680	G	C	0.2485	|| id:ebi-a-GCST90017042	TRUE	reported	igd	20.8057
	13	91182556	0.200307	0.0387328	2.68838e-07	14306	ebi-a-GCST90017042	rs77681628	C	T	0.0586	|| id:ebi-a-GCST90017042	TRUE	reported	igd	26.7445
	chr.exposure	pos.exposure	beta.exposure	se.exposure	pval.exposure	samplesize.exposure	id.exposure	SNP	effect_allele.exposure	other_allele.exposure	eaf.exposure	exposure	mr_keep.exposure	pval_origin.exposure	data_source.exposure	F Value
	4	17051156	0.0697199	0.0157969	8.88423e-06	14306	ebi-a-GCST90017043	rs11929846	C	T	0.7903	|| id:ebi-a-GCST90017043	TRUE	reported	igd	19.4791
	2	174436533	0.0641657	0.0138202	3.37699e-06	14306	ebi-a-GCST90017043	rs12618201	A	G	0.3469	|| id:ebi-a-GCST90017043	TRUE	reported	igd	21.5564
	8	102434276	0.0767335	0.0166041	4.29566e-06	14306	ebi-a-GCST90017043	rs1264476	T	G	0.1998	|| id:ebi-a-GCST90017043	TRUE	reported	igd	21.357
	22	47942612	0.0655056	0.0143596	6.79266e-06	14306	ebi-a-GCST90017043	rs130483	A	G	0.3479	|| id:ebi-a-GCST90017043	TRUE	reported	igd	20.81
	3	168339417	0.111306	0.0230694	1.87176e-06	14306	ebi-a-GCST90017043	rs56069061	A	G	0.8986	|| id:ebi-a-GCST90017043	TRUE	reported	igd	23.279
genus Phascolarctobacterium id.2168	4	183252836	0.0954864	0.0193976	1.08505e-06	14306	ebi-a-GCST90017043	rs56157888	A	C	0.17	|| id:ebi-a-GCST90017043	TRUE	reported	igd	24.2319
	1	203102563	0.0652458	0.0137508	2.08612e-06	14306	ebi-a-GCST90017043	rs6427992	C	G	0.6074	|| id:ebi-a-GCST90017043	TRUE	reported	igd	22.5138
	3	186553389	0.121014	0.0258621	3.60272e-06	14306	ebi-a-GCST90017043	rs74540770	A	G	0.9354	|| id:ebi-a-GCST90017043	TRUE	reported	igd	21.8949
	22	47841258	0.104889	0.0230998	5.73099e-06	14306	ebi-a-GCST90017043	rs74847270	G	A	0.9125	|| id:ebi-a-GCST90017043	TRUE	reported	igd	20.6179
	12	53098742	0.0968661	0.0190575	3.18985e-07	14306	ebi-a-GCST90017043	rs75882962	T	C	0.167	|| id:ebi-a-GCST90017043	TRUE	reported	igd	25.8352
	17	73584441	0.159361	0.0344532	2.66968e-06	14306	ebi-a-GCST90017043	rs76124218	G	C	0.9483	|| id:ebi-a-GCST90017043	TRUE	reported	igd	21.3946
	13	71376322	0.0726921	0.0163201	9.72165e-06	14306	ebi-a-GCST90017043	rs7982713	G	A	0.2286	|| id:ebi-a-GCST90017043	TRUE	reported	igd	19.8394
	chr.exposure	pos.exposure	beta.exposure	se.exposure	pval.exposure	samplesize.exposure	id.exposure	SNP	effect_allele.exposure	other_allele.exposure	eaf.exposure	exposure	mr_keep.exposure	pval_origin.exposure	data_source.exposure	F Value
	16	47237609	0.205676	0.0468917	7.85416e-06	14306	ebi-a-GCST90017044	rs118038478	A	G	0.0755	|| id:ebi-a-GCST90017044	TRUE	reported	igd	19.2387
	1	3343802	0.121281	0.0275017	9.48986e-06	14306	ebi-a-GCST90017044	rs12124567	G	A	0.7376	|| id:ebi-a-GCST90017044	TRUE	reported	igd	19.4476
	6	91019654	0.196528	0.0442322	8.72811e-06	14306	ebi-a-GCST90017044	rs12195431	T	C	0.0785	|| id:ebi-a-GCST90017044	TRUE	reported	igd	19.7411
	11	19943115	0.146098	0.0351529	9.63696e-06	14306	ebi-a-GCST90017044	rs16937247	G	C	0.1402	|| id:ebi-a-GCST90017044	TRUE	reported	igd	17.2729
	2	242066314	0.12085	0.0261776	4.8415e-06	14306	ebi-a-GCST90017044	rs2240542	C	T	0.2575	|| id:ebi-a-GCST90017044	TRUE	reported	igd	21.3125
genus Prevotella7 id.11182	10	133000320	0.114648	0.0254916	6.42407e-06	14306	ebi-a-GCST90017044	rs2918132	T	C	0.6322	|| id:ebi-a-GCST90017044	TRUE	reported	igd	20.2273
	3	60474379	0.139155	0.0297055	2.86847e-06	14306	ebi-a-GCST90017044	rs430270	A	C	0.2008	|| id:ebi-a-GCST90017044	TRUE	reported	igd	21.9444
	2	12101762	0.155486	0.0316057	6.2157e-07	14306	ebi-a-GCST90017044	rs57404562	C	A	0.1799	|| id:ebi-a-GCST90017044	TRUE	reported	igd	24.202
	11	39821773	0.143982	0.031501	7.51052e-06	14306	ebi-a-GCST90017044	rs79263163	C	A	0.8151	|| id:ebi-a-GCST90017044	TRUE	reported	igd	20.8914
	1	29736216	0.123657	0.0278514	9.71717e-06	14306	ebi-a-GCST90017044	rs9426434	C	T	0.7266	|| id:ebi-a-GCST90017044	TRUE	reported	igd	19.7126
	22	24613952	0.158213	0.0336317	2.06685e-06	14306	ebi-a-GCST90017044	rs9608249	G	A	0.829	|| id:ebi-a-GCST90017044	TRUE	reported	igd	22.1303
	18	71442664	0.133012	0.0275361	1.9006e-06	14306	ebi-a-GCST90017044	rs9959718	G	A	0.2495	|| id:ebi-a-GCST90017044	TRUE	reported	igd	23.3333
	chr.exposure	pos.exposure	beta.exposure	se.exposure	pval.exposure	samplesize.exposure	id.exposure	SNP	effect_allele.exposure	other_allele.exposure	eaf.exposure	exposure	mr_keep.exposure	pval_origin.exposure	data_source.exposure	F Value
	9	109009495	0.247373	0.0544087	3.19323e-06	14306	ebi-a-GCST90017045	rs10512344	C	G	0.0328	|| id:ebi-a-GCST90017045	TRUE	reported	igd	20.6713
	19	639161	0.171131	0.0347624	1.24388e-06	14306	ebi-a-GCST90017045	rs111509883	T	C	0.0845	|| id:ebi-a-GCST90017045	TRUE	reported	igd	24.2347
	10	122819400	0.0770209	0.0169462	7.00293e-06	14306	ebi-a-GCST90017045	rs11199734	A	T	0.2177	|| id:ebi-a-GCST90017045	TRUE	reported	igd	20.6573
	2	11232685	0.141357	0.0295665	2.02554e-06	14306	ebi-a-GCST90017045	rs11685699	T	C	0.9175	|| id:ebi-a-GCST90017045	TRUE	reported	igd	22.8578
	22	44236460	0.208089	0.0440393	2.81722e-06	14306	ebi-a-GCST90017045	rs117271932	A	G	0.0467	|| id:ebi-a-GCST90017045	TRUE	reported	igd	22.3263
	4	161115744	0.0785902	0.0177676	7.39078e-06	14306	ebi-a-GCST90017045	rs12648235	T	C	0.1571	|| id:ebi-a-GCST90017045	TRUE	reported	igd	19.565
	5	63736025	0.0761593	0.0165885	5.29078e-06	14306	ebi-a-GCST90017045	rs1304512	G	A	0.2187	|| id:ebi-a-GCST90017045	TRUE	reported	igd	21.0781
	15	38513730	0.0743348	0.0165291	9.33211e-06	14306	ebi-a-GCST90017045	rs16966465	G	C	0.2346	|| id:ebi-a-GCST90017045	TRUE	reported	igd	20.2249
	10	12497581	0.105558	0.023773	8.1298e-06	14306	ebi-a-GCST90017045	rs2104588	T	C	0.1193	|| id:ebi-a-GCST90017045	TRUE	reported	igd	19.7158
genus Prevotella9 id.11183	1	14161251	0.0838978	0.0188523	8.9714e-06	14306	ebi-a-GCST90017045	rs2495052	A	G	0.1789	|| id:ebi-a-GCST90017045	TRUE	reported	igd	19.8049
	8	19115604	0.0724576	0.0151603	1.68896e-06	14306	ebi-a-GCST90017045	rs2683313	G	A	0.6918	|| id:ebi-a-GCST90017045	TRUE	reported	igd	22.843
	22	37758730	0.0636957	0.0143983	9.94878e-06	14306	ebi-a-GCST90017045	rs4821647	G	C	0.3638	|| id:ebi-a-GCST90017045	TRUE	reported	igd	19.5703
	17	59421778	0.0640113	0.0144162	8.5844e-06	14306	ebi-a-GCST90017045	rs4968431	G	T	0.3638	|| id:ebi-a-GCST90017045	TRUE	reported	igd	19.7157
	18	19993452	0.0671292	0.014423	3.76011e-06	14306	ebi-a-GCST90017045	rs7232121	G	C	0.4791	|| id:ebi-a-GCST90017045	TRUE	reported	igd	21.6627
	18	71992502	0.0823764	0.0182126	8.93305e-06	14306	ebi-a-GCST90017045	rs7237249	T	C	0.8648	|| id:ebi-a-GCST90017045	TRUE	reported	igd	20.4579
	2	91954502	0.176186	0.0393068	8.78294e-06	14306	ebi-a-GCST90017045	rs72815774	C	T	0.9294	|| id:ebi-a-GCST90017045	TRUE	reported	igd	20.0913
	20	21470713	0.0915771	0.0193245	2.04e-06	14306	ebi-a-GCST90017045	rs746764	C	T	0.827	|| id:ebi-a-GCST90017045	TRUE	reported	igd	22.4573
	12	1794470	0.0870786	0.0197951	7.2835e-06	14306	ebi-a-GCST90017045	rs7976209	C	T	0.833	|| id:ebi-a-GCST90017045	TRUE	reported	igd	19.3512
	1	118852817	0.0778845	0.0176068	4.61732e-06	14306	ebi-a-GCST90017045	rs9428102	G	A	0.7634	|| id:ebi-a-GCST90017045	TRUE	reported	igd	19.5678
	22	26152738	0.0917591	0.0202697	6.10408e-06	14306	ebi-a-GCST90017045	rs9613013	G	A	0.1451	|| id:ebi-a-GCST90017045	TRUE	reported	igd	20.4929
	chr.exposure	pos.exposure	beta.exposure	se.exposure	pval.exposure	samplesize.exposure	id.exposure	SNP	effect_allele.exposure	other_allele.exposure	eaf.exposure	exposure	mr_keep.exposure	pval_origin.exposure	data_source.exposure	F Value
	4	163830516	0.116395	0.0262253	6.28985e-06	14306	ebi-a-GCST90017046	rs12501673	A	G	0.325	|| id:ebi-a-GCST90017046	TRUE	reported	igd	19.6983
	4	155865671	0.169579	0.0368251	6.60998e-06	14306	ebi-a-GCST90017046	rs17032291	C	T	0.8588	|| id:ebi-a-GCST90017046	TRUE	reported	igd	21.2059
	4	149562638	0.157739	0.0339924	3.55378e-06	14306	ebi-a-GCST90017046	rs17582787	G	A	0.8708	|| id:ebi-a-GCST90017046	TRUE	reported	igd	21.5335
	19	1970021	0.142236	0.032391	9.44778e-06	14306	ebi-a-GCST90017046	rs2074881	C	T	0.8211	|| id:ebi-a-GCST90017046	TRUE	reported	igd	19.2828
	9	112657543	0.172329	0.0326671	1.55282e-07	14306	ebi-a-GCST90017046	rs2900503	T	G	0.829	|| id:ebi-a-GCST90017046	TRUE	reported	igd	27.8289
genus Rikenellaceae RC9 gut group id.11191	10	135010198	0.136346	0.0293073	4.42374e-06	14306	ebi-a-GCST90017046	rs2998141	C	T	0.7783	|| id:ebi-a-GCST90017046	TRUE	reported	igd	21.6438
	4	84698188	0.118021	0.0271041	5.45645e-06	14306	ebi-a-GCST90017046	rs4270579	A	G	0.6958	|| id:ebi-a-GCST90017046	TRUE	reported	igd	18.9604
	7	73334987	0.119376	0.0260548	4.71726e-06	14306	ebi-a-GCST90017046	rs4717843	T	G	0.6382	|| id:ebi-a-GCST90017046	TRUE	reported	igd	20.9922
	11	102429543	0.114423	0.0247798	5.26478e-06	14306	ebi-a-GCST90017046	rs7113155	G	C	0.4523	|| id:ebi-a-GCST90017046	TRUE	reported	igd	21.3222
	16	76605358	0.124153	0.027741	6.18771e-06	14306	ebi-a-GCST90017046	rs7193937	G	C	0.2893	|| id:ebi-a-GCST90017046	TRUE	reported	igd	20.0295
	5	31406285	0.156284	0.0350462	7.9704e-06	14306	ebi-a-GCST90017046	rs7712231	A	G	0.165	|| id:ebi-a-GCST90017046	TRUE	reported	igd	19.886
	6	165668732	0.17405	0.0383423	4.55638e-06	14306	ebi-a-GCST90017046	rs80309088	G	A	0.1292	|| id:ebi-a-GCST90017046	TRUE	reported	igd	20.6059
	1	164800873	0.114849	0.0249013	4.80806e-06	14306	ebi-a-GCST90017046	rs9887954	A	G	0.5636	|| id:ebi-a-GCST90017046	TRUE	reported	igd	21.2721
	chr.exposure	pos.exposure	beta.exposure	se.exposure	pval.exposure	samplesize.exposure	id.exposure	SNP	effect_allele.exposure	other_allele.exposure	eaf.exposure	exposure	mr_keep.exposure	pval_origin.exposure	data_source.exposure	F Value
	8	3391361	0.0649918	0.0145501	6.61592e-06	14306	ebi-a-GCST90017047	rs10091895	C	T	0.7863	|| id:ebi-a-GCST90017047	TRUE	reported	igd	19.9519
	7	5319387	0.0622202	0.0127675	1.17009e-06	14306	ebi-a-GCST90017047	rs10279978	G	A	0.6521	|| id:ebi-a-GCST90017047	TRUE	reported	igd	23.7493
	11	99665050	0.0726779	0.0158263	6.48649e-06	14306	ebi-a-GCST90017047	rs11221428	C	T	0.8449	|| id:ebi-a-GCST90017047	TRUE	reported	igd	21.0885
	5	57229635	0.131039	0.0293815	7.95848e-06	14306	ebi-a-GCST90017047	rs114398731	C	G	0.9642	|| id:ebi-a-GCST90017047	TRUE	reported	igd	19.8908
	1	171903885	0.0875276	0.0196779	5.08124e-06	14306	ebi-a-GCST90017047	rs16843578	T	C	0.9175	|| id:ebi-a-GCST90017047	TRUE	reported	igd	19.7848
	7	106406824	0.214911	0.0474739	8.52236e-06	14306	ebi-a-GCST90017047	rs28603357	C	T	0.9364	|| id:ebi-a-GCST90017047	TRUE	reported	igd	20.4931
	7	78136725	0.0550261	0.0120835	5.87665e-06	14306	ebi-a-GCST90017047	rs34302036	A	G	0.4145	|| id:ebi-a-GCST90017047	TRUE	reported	igd	20.7373
	10	17019559	0.092888	0.0171454	3.99595e-08	14306	ebi-a-GCST90017047	rs61841503	G	A	0.1372	|| id:ebi-a-GCST90017047	TRUE	reported	igd	29.3511
	7	145760298	0.0710048	0.0156654	4.65833e-06	14306	ebi-a-GCST90017047	rs62504452	G	A	0.834	|| id:ebi-a-GCST90017047	TRUE	reported	igd	20.5444
genus Romboutsia id.11347	11	133834657	0.0919112	0.0205738	6.98361e-06	14306	ebi-a-GCST90017047	rs7109293	A	G	0.0924	|| id:ebi-a-GCST90017047	TRUE	reported	igd	19.9576
	8	5088054	0.190644	0.0421065	5.06559e-06	14306	ebi-a-GCST90017047	rs75200530	G	T	0.9533	|| id:ebi-a-GCST90017047	TRUE	reported	igd	20.4997
	2	16066705	0.129578	0.0280454	6.70795e-06	14306	ebi-a-GCST90017047	rs75987356	A	G	0.9314	|| id:ebi-a-GCST90017047	TRUE	reported	igd	21.3471
	13	88725540	0.094406	0.0208544	7.3697e-06	14306	ebi-a-GCST90017047	rs77702691	G	A	0.8976	|| id:ebi-a-GCST90017047	TRUE	reported	igd	20.4929
	6	135411737	0.0722815	0.0162353	9.38469e-06	14306	ebi-a-GCST90017047	rs9389266	T	G	0.169	|| id:ebi-a-GCST90017047	TRUE	reported	igd	19.8214
	13	32720756	0.0580018	0.0127495	5.75692e-06	14306	ebi-a-GCST90017047	rs9567264	C	T	0.3201	|| id:ebi-a-GCST90017047	TRUE	reported	igd	20.6965
	chr.exposure	pos.exposure	beta.exposure	se.exposure	pval.exposure	samplesize.exposure	id.exposure	SNP	effect_allele.exposure	other_allele.exposure	eaf.exposure	exposure	mr_keep.exposure	pval_origin.exposure	data_source.exposure	F Value
	4	119349	0.153844	0.0329324	1.19525e-06	14306	ebi-a-GCST90017048	rs116270582	A	T	0.9513	|| id:ebi-a-GCST90017048	TRUE	reported	igd	21.823
	1	95178974	0.0697527	0.0153607	7.3426e-06	14306	ebi-a-GCST90017048	rs12740451	T	C	0.1252	|| id:ebi-a-GCST90017048	TRUE	reported	igd	20.6205
	11	12009569	0.0980434	0.020957	2.91112e-06	14306	ebi-a-GCST90017048	rs16910295	C	T	0.9394	|| id:ebi-a-GCST90017048	TRUE	reported	igd	21.8866
	16	8307948	0.0629765	0.0123489	5.01164e-07	14306	ebi-a-GCST90017048	rs2034589	G	C	0.2276	|| id:ebi-a-GCST90017048	TRUE	reported	igd	26.0076
	12	50650057	0.0550687	0.0112481	9.6984e-07	14306	ebi-a-GCST90017048	rs2160994	T	C	0.3797	|| id:ebi-a-GCST90017048	TRUE	reported	igd	23.9691
	5	96018066	0.0565693	0.0126792	9.26147e-06	14306	ebi-a-GCST90017048	rs28040	G	C	0.2127	|| id:ebi-a-GCST90017048	TRUE	reported	igd	19.9057
	5	89598914	0.0493786	0.0106763	4.11405e-06	14306	ebi-a-GCST90017048	rs2943022	T	C	0.4602	|| id:ebi-a-GCST90017048	TRUE	reported	igd	21.3912
genus Roseburia id.2012	1	194183650	0.0777312	0.0172985	8.12587e-06	14306	ebi-a-GCST90017048	rs302266	C	T	0.8797	|| id:ebi-a-GCST90017048	TRUE	reported	igd	20.1917
	5	125076494	0.0690327	0.0152884	5.90147e-06	14306	ebi-a-GCST90017048	rs329182	T	C	0.1571	|| id:ebi-a-GCST90017048	TRUE	reported	igd	20.3885
	10	16051097	0.0488326	0.0106404	4.67218e-06	14306	ebi-a-GCST90017048	rs4748237	G	C	0.4046	|| id:ebi-a-GCST90017048	TRUE	reported	igd	21.0622
	15	86512809	0.179284	0.0404954	9.98964e-06	14306	ebi-a-GCST90017048	rs55858165	A	C	0.0775	|| id:ebi-a-GCST90017048	TRUE	reported	igd	19.6007
	15	37859065	0.0741405	0.0171601	8.30099e-06	14306	ebi-a-GCST90017048	rs57466170	C	T	0.0865	|| id:ebi-a-GCST90017048	TRUE	reported	igd	18.6669
	3	57116228	0.0497336	0.0108158	3.5272e-06	14306	ebi-a-GCST90017048	rs6445851	A	G	0.5994	|| id:ebi-a-GCST90017048	TRUE	reported	igd	21.1438
	6	12774611	0.0961587	0.0204975	2.47942e-06	14306	ebi-a-GCST90017048	rs6930661	T	C	0.9245	|| id:ebi-a-GCST90017048	TRUE	reported	igd	22.0077
	6	166170836	0.104628	0.0230897	7.50205e-06	14306	ebi-a-GCST90017048	rs75326254	T	C	0.9364	|| id:ebi-a-GCST90017048	TRUE	reported	igd	20.5333
	10	79277321	0.232125	0.0481562	1.47798e-07	14306	ebi-a-GCST90017048	rs75820970	G	C	0.9374	|| id:ebi-a-GCST90017048	TRUE	reported	igd	23.2348
	5	144135655	0.0968739	0.0214067	9.98321e-06	14306	ebi-a-GCST90017048	rs78753150	A	C	0.0586	|| id:ebi-a-GCST90017048	TRUE	reported	igd	20.4793
	13	103117486	0.0588452	0.0126228	4.75116e-06	14306	ebi-a-GCST90017048	rs9300744	T	C	0.7614	|| id:ebi-a-GCST90017048	TRUE	reported	igd	21.7325
	chr.exposure	pos.exposure	beta.exposure	se.exposure	pval.exposure	samplesize.exposure	id.exposure	SNP	effect_allele.exposure	other_allele.exposure	eaf.exposure	exposure	mr_keep.exposure	pval_origin.exposure	data_source.exposure	F Value
	10	35262588	0.0547387	0.0115163	2.1918e-06	14306	ebi-a-GCST90017049	rs10827477	G	A	0.6849	|| id:ebi-a-GCST90017049	TRUE	reported	igd	22.5924
	5	32477664	0.0820689	0.0174463	3.98896e-06	14306	ebi-a-GCST90017049	rs113753996	T	C	0.1372	|| id:ebi-a-GCST90017049	TRUE	reported	igd	22.1284
	13	108775162	0.0484169	0.0108254	8.16188e-06	14306	ebi-a-GCST90017049	rs1223978	T	C	0.4801	|| id:ebi-a-GCST90017049	TRUE	reported	igd	20.0035
	6	50405920	0.0830505	0.0180073	3.52574e-06	14306	ebi-a-GCST90017049	rs1492620	C	T	0.9195	|| id:ebi-a-GCST90017049	TRUE	reported	igd	21.271
	12	1891043	0.0518814	0.0107482	1.43857e-06	14306	ebi-a-GCST90017049	rs2286384	C	G	0.499	|| id:ebi-a-GCST90017049	TRUE	reported	igd	23.2998
	21	19151940	0.0585939	0.0121017	1.32681e-06	14306	ebi-a-GCST90017049	rs243585	G	C	0.6988	|| id:ebi-a-GCST90017049	TRUE	reported	igd	23.4429
genus Ruminiclostridium5 id.11355	10	12835085	0.0518991	0.0108777	1.70314e-06	14306	ebi-a-GCST90017049	rs2482038	C	A	0.4384	|| id:ebi-a-GCST90017049	TRUE	reported	igd	22.7638
	8	131316030	0.051717	0.0113369	5.53962e-06	14306	ebi-a-GCST90017049	rs2791343	T	C	0.34	|| id:ebi-a-GCST90017049	TRUE	reported	igd	20.8103
	1	41878680	0.0520975	0.0115111	6.20869e-06	14306	ebi-a-GCST90017049	rs2801960	C	G	0.3181	|| id:ebi-a-GCST90017049	TRUE	reported	igd	20.4833
	21	33811886	0.0489617	0.0108702	6.81648e-06	14306	ebi-a-GCST90017049	rs2833828	G	A	0.4533	|| id:ebi-a-GCST90017049	TRUE	reported	igd	20.2879
	3	55243531	0.0713749	0.0165826	9.9552e-06	14306	ebi-a-GCST90017049	rs4955951	G	A	0.9076	|| id:ebi-a-GCST90017049	TRUE	reported	igd	18.5262
	20	60293505	0.0932955	0.0199206	2.64107e-06	14306	ebi-a-GCST90017049	rs6121460	G	A	0.0805	|| id:ebi-a-GCST90017049	TRUE	reported	igd	21.9339
	2	103755970	0.181548	0.0414078	8.82226e-06	14306	ebi-a-GCST90017049	rs73002572	G	C	0.0547	|| id:ebi-a-GCST90017049	TRUE	reported	igd	19.2229
	20	41177956	0.0950311	0.0193507	1.14623e-06	14306	ebi-a-GCST90017049	rs79968837	G	A	0.9314	|| id:ebi-a-GCST90017049	TRUE	reported	igd	24.1178
	16	86769909	0.0740543	0.0159151	5.89807e-06	14306	ebi-a-GCST90017049	rs8053158	G	A	0.8797	|| id:ebi-a-GCST90017049	TRUE	reported	igd	21.6512
	chr.exposure	pos.exposure	beta.exposure	se.exposure	pval.exposure	samplesize.exposure	id.exposure	SNP	effect_allele.exposure	other_allele.exposure	eaf.exposure	exposure	mr_keep.exposure	pval_origin.exposure	data_source.exposure	F Value
	10	132651293	0.097606	0.0216072	3.47144e-06	14306	ebi-a-GCST90017050	rs10829821	C	T	0.9145	|| id:ebi-a-GCST90017050	TRUE	reported	igd	20.4059
	10	128214403	0.166823	0.0376681	9.15946e-06	14306	ebi-a-GCST90017050	rs116969552	G	A	0.9642	|| id:ebi-a-GCST90017050	TRUE	reported	igd	19.6139
	8	79766499	0.0625299	0.0137876	4.64836e-06	14306	ebi-a-GCST90017050	rs11992182	A	C	0.2883	|| id:ebi-a-GCST90017050	TRUE	reported	igd	20.5683
	14	20954661	0.0999189	0.0197169	2.53653e-07	14306	ebi-a-GCST90017050	rs1756364	G	T	0.1213	|| id:ebi-a-GCST90017050	TRUE	reported	igd	25.6814
	15	61047117	0.105422	0.0237274	9.11612e-06	14306	ebi-a-GCST90017050	rs1871858	G	C	0.9205	|| id:ebi-a-GCST90017050	TRUE	reported	igd	19.7407
	19	49209339	0.0554866	0.0122755	6.40206e-06	14306	ebi-a-GCST90017050	rs2548459	C	T	0.4702	|| id:ebi-a-GCST90017050	TRUE	reported	igd	20.4314
genus Ruminiclostridium6 id.11356	4	36478011	0.0720077	0.0165387	8.99146e-06	14306	ebi-a-GCST90017050	rs35362464	C	A	0.1511	|| id:ebi-a-GCST90017050	TRUE	reported	igd	18.9564
	16	72136154	0.15913	0.0322283	1.08648e-06	14306	ebi-a-GCST90017050	rs61060922	T	G	0.0447	|| id:ebi-a-GCST90017050	TRUE	reported	igd	24.3798
	11	86179076	0.13498	0.0310715	3.39414e-06	14306	ebi-a-GCST90017050	rs663262	C	T	0.9483	|| id:ebi-a-GCST90017050	TRUE	reported	igd	18.8718
	19	10115515	0.118994	0.026487	9.30208e-06	14306	ebi-a-GCST90017050	rs67479537	T	C	0.0795	|| id:ebi-a-GCST90017050	TRUE	reported	igd	20.1829
	14	56938952	0.200894	0.0406434	1.07696e-06	14306	ebi-a-GCST90017050	rs71414120	T	G	0.0765	|| id:ebi-a-GCST90017050	TRUE	reported	igd	24.4317
	18	76018244	0.135604	0.0295174	4.9537e-06	14306	ebi-a-GCST90017050	rs72991535	T	G	0.0596	|| id:ebi-a-GCST90017050	TRUE	reported	igd	21.1052
	7	101271282	0.058665	0.013208	7.28887e-06	14306	ebi-a-GCST90017050	rs73176030	T	C	0.3181	|| id:ebi-a-GCST90017050	TRUE	reported	igd	19.728
	11	40289063	0.0736533	0.0153163	1.29587e-06	14306	ebi-a-GCST90017050	rs77193512	A	G	0.167	|| id:ebi-a-GCST90017050	TRUE	reported	igd	23.1247
	2	5548605	0.0554234	0.0125423	8.57946e-06	14306	ebi-a-GCST90017050	rs792058	G	A	0.4274	|| id:ebi-a-GCST90017050	TRUE	reported	igd	19.5268
	1	240503826	0.11614	0.0243083	1.66054e-06	14306	ebi-a-GCST90017050	rs79968172	G	A	0.0557	|| id:ebi-a-GCST90017050	TRUE	reported	igd	22.8273
	13	111703249	0.0804138	0.0176692	7.10133e-06	14306	ebi-a-GCST90017050	rs9555756	C	A	0.8757	|| id:ebi-a-GCST90017050	TRUE	reported	igd	20.7123
	chr.exposure	pos.exposure	beta.exposure	se.exposure	pval.exposure	samplesize.exposure	id.exposure	SNP	effect_allele.exposure	other_allele.exposure	eaf.exposure	exposure	mr_keep.exposure	pval_origin.exposure	data_source.exposure	F Value
	9	74214419	0.0600735	0.0132737	4.10355e-06	14306	ebi-a-GCST90017051	rs113048721	C	G	0.2386	|| id:ebi-a-GCST90017051	TRUE	reported	igd	20.4824
	7	47013498	0.0980026	0.0202616	2.37203e-06	14306	ebi-a-GCST90017051	rs115044523	A	G	0.9085	|| id:ebi-a-GCST90017051	TRUE	reported	igd	23.3953
	1	247710285	0.0570422	0.0122359	3.14869e-06	14306	ebi-a-GCST90017051	rs12040548	G	T	0.3111	|| id:ebi-a-GCST90017051	TRUE	reported	igd	21.7331
	11	68886460	0.0727975	0.0155594	3.17995e-06	14306	ebi-a-GCST90017051	rs12419854	A	T	0.8221	|| id:ebi-a-GCST90017051	TRUE	reported	igd	21.8901
	2	204706865	0.0511195	0.0111418	5.68054e-06	14306	ebi-a-GCST90017051	rs13033315	T	A	0.4503	|| id:ebi-a-GCST90017051	TRUE	reported	igd	21.0505
	3	157841287	0.0641507	0.0123339	2.07272e-07	14306	ebi-a-GCST90017051	rs57665991	G	C	0.7614	|| id:ebi-a-GCST90017051	TRUE	reported	igd	27.0522
genus Ruminiclostridium9 id.11357	20	2210530	0.0586425	0.0131004	4.86598e-06	14306	ebi-a-GCST90017051	rs6082461	A	C	0.2068	|| id:ebi-a-GCST90017051	TRUE	reported	igd	20.0381
	12	10702414	0.050797	0.0112182	7.06903e-06	14306	ebi-a-GCST90017051	rs7137760	C	T	0.4145	|| id:ebi-a-GCST90017051	TRUE	reported	igd	20.5036
	6	128568828	0.081629	0.0169515	2.13974e-06	14306	ebi-a-GCST90017051	rs73592673	T	A	0.8529	|| id:ebi-a-GCST90017051	TRUE	reported	igd	23.1885
	8	14697544	0.0532742	0.0119274	7.91571e-06	14306	ebi-a-GCST90017051	rs74303178	T	C	0.3201	|| id:ebi-a-GCST90017051	TRUE	reported	igd	19.95
	6	67655320	0.0944998	0.0210206	7.58281e-06	14306	ebi-a-GCST90017051	rs78191726	T	C	0.0905	|| id:ebi-a-GCST90017051	TRUE	reported	igd	20.2102
	7	155701010	0.0928576	0.0204871	6.46934e-06	14306	ebi-a-GCST90017051	rs79082720	C	G	0.0954	|| id:ebi-a-GCST90017051	TRUE	reported	igd	20.5435
	19	34371198	0.0950908	0.0197177	2.55994e-06	14306	ebi-a-GCST90017051	rs918449	G	A	0.9304	|| id:ebi-a-GCST90017051	TRUE	reported	igd	23.2576
	13	90441578	0.0699728	0.0154939	4.65961e-06	14306	ebi-a-GCST90017051	rs9522712	T	C	0.1451	|| id:ebi-a-GCST90017051	TRUE	reported	igd	20.3956
	3	29179983	0.0717454	0.0159673	8.71967e-06	14306	ebi-a-GCST90017051	rs9809789	T	C	0.832	|| id:ebi-a-GCST90017051	TRUE	reported	igd	20.1895
	chr.exposure	pos.exposure	beta.exposure	se.exposure	pval.exposure	samplesize.exposure	id.exposure	SNP	effect_allele.exposure	other_allele.exposure	eaf.exposure	exposure	mr_keep.exposure	pval_origin.exposure	data_source.exposure	F Value
	10	44293839	0.0717102	0.0148151	1.15271e-06	14306	ebi-a-GCST90017041	rs10899911	G	A	0.7276	|| id:ebi-a-GCST90017041	TRUE	reported	igd	23.4289
	3	30163689	0.0662952	0.0146114	6.22917e-06	14306	ebi-a-GCST90017041	rs11715853	A	G	0.6859	|| id:ebi-a-GCST90017041	TRUE	reported	igd	20.5864
	12	126498824	0.0756729	0.0159035	2.75518e-06	14306	ebi-a-GCST90017041	rs1403396	T	A	0.7853	|| id:ebi-a-GCST90017041	TRUE	reported	igd	22.641
	6	137615592	0.0840967	0.0177315	2.89714e-06	14306	ebi-a-GCST90017041	rs2090816	A	C	0.1571	|| id:ebi-a-GCST90017041	TRUE	reported	igd	22.494
	20	25599776	0.0681778	0.0134756	5.38481e-07	14306	ebi-a-GCST90017041	rs2387977	C	T	0.5417	|| id:ebi-a-GCST90017041	TRUE	reported	igd	25.597
	8	114804024	0.109554	0.0235433	3.3485e-06	14306	ebi-a-GCST90017041	rs35055552	T	C	0.0775	|| id:ebi-a-GCST90017041	TRUE	reported	igd	21.6532
	4	15565736	0.0684946	0.0142143	1.51206e-06	14306	ebi-a-GCST90017041	rs35414597	A	T	0.661	|| id:ebi-a-GCST90017041	TRUE	reported	igd	23.22
genus Parasutterella id.2892	17	14692867	0.104458	0.0228089	2.87071e-06	14306	ebi-a-GCST90017041	rs55877868	C	A	0.9036	|| id:ebi-a-GCST90017041	TRUE	reported	igd	20.9737
	3	156550415	0.229468	0.0502262	5.88383e-06	14306	ebi-a-GCST90017041	rs62273907	A	G	0.0497	|| id:ebi-a-GCST90017041	TRUE	reported	igd	20.8729
	3	193896709	0.0684957	0.0150892	8.13355e-06	14306	ebi-a-GCST90017041	rs6809952	A	G	0.7266	|| id:ebi-a-GCST90017041	TRUE	reported	igd	20.606
	4	65556925	0.0636852	0.0132645	1.78328e-06	14306	ebi-a-GCST90017041	rs6828768	C	T	0.5	|| id:ebi-a-GCST90017041	TRUE	reported	igd	23.0513
	12	5275540	0.0646859	0.0134256	1.32776e-06	14306	ebi-a-GCST90017041	rs7303158	C	T	0.4423	|| id:ebi-a-GCST90017041	TRUE	reported	igd	23.2141
	12	53260710	0.0617522	0.0136438	5.92052e-06	14306	ebi-a-GCST90017041	rs7311004	C	T	0.6243	|| id:ebi-a-GCST90017041	TRUE	reported	igd	20.4849
	2	72235444	0.066273	0.0132736	6.31699e-07	14306	ebi-a-GCST90017041	rs7572229	G	A	0.4901	|| id:ebi-a-GCST90017041	TRUE	reported	igd	24.9285
	2	178954708	0.146315	0.0297119	1.57438e-06	14306	ebi-a-GCST90017041	rs78383039	C	T	0.9334	|| id:ebi-a-GCST90017041	TRUE	reported	igd	24.2503
	15	67316307	0.0618345	0.0133	3.62093e-06	14306	ebi-a-GCST90017041	rs8039785	T	G	0.4523	|| id:ebi-a-GCST90017041	TRUE	reported	igd	21.6152
	8	16674526	0.0713448	0.0156958	4.95291e-06	14306	ebi-a-GCST90017041	rs823424	A	G	0.7903	|| id:ebi-a-GCST90017041	TRUE	reported	igd	20.6613
	chr.exposure	pos.exposure	beta.exposure	se.exposure	pval.exposure	samplesize.exposure	id.exposure	SNP	effect_allele.exposure	other_allele.exposure	eaf.exposure	exposure	mr_keep.exposure	pval_origin.exposure	data_source.exposure	F Value
	4	35358594	0.121167	0.0225844	1.23637e-07	14306	ebi-a-GCST90017042	rs10031059	C	T	0.7793	|| id:ebi-a-GCST90017042	TRUE	reported	igd	28.784
	10	78716030	0.195611	0.0392217	1.32859e-06	14306	ebi-a-GCST90017042	rs11001941	A	G	0.9324	|| id:ebi-a-GCST90017042	TRUE	reported	igd	24.8733
[truncated: 1,137 more rows]
