# Supplementary material for: Exploring causality in the association between gut microbiota and irritable bowel syndrome risk: a large Mendelian randomization study
Source: Aging (Albany NY). 2024 Apr 25;16(8):7448–59. doi: 10.18632/aging.205771 (PMC11087118; doi:10.18632/aging.205771)
Supplement: Supplementary Table 2 [file aging-16-205771-s003.xlsx]

## Sheet: Sheet1
Supplementary Table 2. Original MR Results.
method	nsnp	b	se	pval	lo_ci	up_ci	or	or_lci95	or_uci95
MR Egger	7	0.500063	0.547086	0.402618	-0.572225	1.57235	1.64883	0.564268	4.81796
Weighted median	7	0.242083	0.167583	0.148584	-0.0863807	0.570546	1.2739	0.917245	1.76923
Inverse variance weighted	7	0.294306	0.135873	0.0303087	0.0279944	0.560618	1.34219	1.02839	1.75175
Simple mode	7	0.194708	0.268402	0.495495	-0.33136	0.720776	1.21496	0.717946	2.05603
Weighted mode	7	0.171301	0.225544	0.476324	-0.270766	0.613368	1.18685	0.762795	1.84664
Family Alcaligenaceae
b	se	pval	lo_ci	up_ci	or	or_lci95	or_uci95
-0.0438998	0.40142	0.914886	-0.830684	0.742884	0.95705	0.435751	2.10199
-0.180769	0.124628	0.146928	-0.425041	0.063502	0.834628	0.653743	1.06556
-0.190621	0.0890126	0.0322338	-0.365085	-0.0161557	0.826446	0.694137	0.983974
-0.289784	0.212739	0.19817	-0.706752	0.127185	0.748425	0.493243	1.13563
-0.237462	0.203948	0.26692	-0.6372	0.162277	0.788627	0.528771	1.17619
Family XIII
method	nsnp	b	se	pval	lo_ci	up_ci	or	or_lci95	or_uci95
MR Egger	7	0.500063	0.547086	0.402618	-0.572225	1.57235	1.64883	0.564268	4.81796
Weighted median	7	0.242083	0.167583	0.148584	-0.0863807	0.570546	1.2739	0.917245	1.76923
Inverse variance weighted	7	0.294306	0.135873	0.0303087	0.0279944	0.560618	1.34219	1.02839	1.75175
Simple mode	7	0.194708	0.268402	0.495495	-0.33136	0.720776	1.21496	0.717946	2.05603
Weighted mode	7	0.171301	0.225544	0.476324	-0.270766	0.613368	1.18685	0.762795	1.84664
Family Prevotellaceae
id.outcome	outcome	exposure	method	nsnp	b	se	pval	lo_ci	up_ci	or	or_lci95	or_uci95
uDf6S8	Irritable bowel syndrome_R8	|| id:ebi-a-GCST90016948	MR Egger	16	0.110255	0.26065	0.678722	-0.400619	0.621129	1.11656	0.669905	1.86103
uDf6S8	Irritable bowel syndrome_R8	|| id:ebi-a-GCST90016948	Weighted median	16	0.171512	0.0957534	0.0732628	-0.0161641	0.359189	1.1871	0.983966	1.43217
uDf6S8	Irritable bowel syndrome_R8	|| id:ebi-a-GCST90016948	Inverse variance weighted	16	0.217683	0.0718365	0.00244345	0.0768836	0.358483	1.24319	1.07992	1.43116
uDf6S8	Irritable bowel syndrome_R8	|| id:ebi-a-GCST90016948	Simple mode	16	0.182199	0.16496	0.286775	-0.141121	0.50552	1.19985	0.868384	1.65785
uDf6S8	Irritable bowel syndrome_R8	|| id:ebi-a-GCST90016948	Weighted mode	16	0.17385	0.159975	0.294311	-0.139701	0.487401	1.18988	0.869618	1.62808
genus Coprobacter
method	nsnp	b	se	pval	lo_ci	up_ci	or	or_lci95	or_uci95
MR Egger	11	-0.315737	0.255884	0.248488	-0.817271	0.185796	0.729251	0.441635	1.20418
Weighted median	11	-0.110715	0.0851075	0.193298	-0.277526	0.0560956	0.895194	0.757656	1.0577
Inverse variance weighted	11	-0.15276	0.0637074	0.0164925	-0.277626	-0.0278931	0.858336	0.75758	0.972492
Simple mode	11	-0.0437282	0.145678	0.770195	-0.329258	0.241802	0.957214	0.719457	1.27354
Weighted mode	11	-0.0411719	0.1372	0.770256	-0.310084	0.22774	0.959664	0.733385	1.25576
Lachnospiraceae UCG004
id.exposure	id.outcome	outcome	exposure	method	nsnp	b	se	pval	lo_ci	up_ci	or	or_lci95	or_uci95
ebi-a-GCST90017026	uDf6S8	Irritable bowel syndrome_R8	|| id:ebi-a-GCST90017026	MR Egger	13	0.138197	0.395726	0.733515	-0.637426	0.91382	1.1482	0.528651	2.49383
ebi-a-GCST90017026	uDf6S8	Irritable bowel syndrome_R8	|| id:ebi-a-GCST90017026	Weighted median	13	0.201606	0.117101	0.0851345	-0.027912	0.431123	1.22337	0.972474	1.53899
ebi-a-GCST90017026	uDf6S8	Irritable bowel syndrome_R8	|| id:ebi-a-GCST90017026	Inverse variance weighted	13	0.172958	0.088187	0.0498481	0.000111574	0.345805	1.18882	1.00011	1.41313
ebi-a-GCST90017026	uDf6S8	Irritable bowel syndrome_R8	|| id:ebi-a-GCST90017026	Simple mode	13	0.310063	0.221564	0.187	-0.124202	0.744328	1.36351	0.883201	2.10503
ebi-a-GCST90017026	uDf6S8	Irritable bowel syndrome_R8	|| id:ebi-a-GCST90017026	Weighted mode	13	0.286517	0.217329	0.211994	-0.139447	0.712482	1.33178	0.869839	2.03904
