# Supplementary material for: Exploring causality in the association between gut microbiota and irritable bowel syndrome risk: a large Mendelian randomization study
Source: Aging (Albany NY). 2024 Apr 25;16(8):7448–59. doi: 10.18632/aging.205771 (PMC11087118; doi:10.18632/aging.205771)
Supplement: Supplementary Table 3 [file aging-16-205771-s004.xlsx]

## Sheet: Sheet1
Supplementary Table 3. MR analysis results of other gut microbiota and IBS.
Exposure ID outcome method beta se p
ebi-a-GCST90016908 uDf6S8 Irritable bowel syndrome_R8 || id:ebi-a-GCST90016908 MR Egger 15 -0.226332746422646 0.347121367919319 0.52574432277489
ebi-a-GCST90016908 uDf6S8 Irritable bowel syndrome_R8 || id:ebi-a-GCST90016908 Weighted median 15 -0.0817420695933693 0.129266317946405 0.527155603384612
ebi-a-GCST90016908 uDf6S8 Irritable bowel syndrome_R8 || id:ebi-a-GCST90016908 Inverse variance weighted 15 -0.0280403850644731 0.11690982819407 0.810449443060901
ebi-a-GCST90016908 uDf6S8 Irritable bowel syndrome_R8 || id:ebi-a-GCST90016908 Simple mode 15 0.308116224296788 0.316432590974707 0.346721226589905
ebi-a-GCST90016908 uDf6S8 Irritable bowel syndrome_R8 || id:ebi-a-GCST90016908 Weighted mode 15 -0.399889167172687 0.179376061566376 0.0426832539375662
ebi-a-GCST90016909 uDf6S8 Irritable bowel syndrome_R8 || id:ebi-a-GCST90016909 MR Egger 6 -0.35033917940601 0.542936067728335 0.553901059018196
ebi-a-GCST90016909 uDf6S8 Irritable bowel syndrome_R8 || id:ebi-a-GCST90016909 Weighted median 6 -0.0145007391010032 0.124712972950981 0.907436262146768
ebi-a-GCST90016909 uDf6S8 Irritable bowel syndrome_R8 || id:ebi-a-GCST90016909 Inverse variance weighted 6 0.0397984758482473 0.147979272317966 0.787971016846254
ebi-a-GCST90016909 uDf6S8 Irritable bowel syndrome_R8 || id:ebi-a-GCST90016909 Simple mode 6 -0.0154475094040464 0.172439343619402 0.932096884462438
ebi-a-GCST90016909 uDf6S8 Irritable bowel syndrome_R8 || id:ebi-a-GCST90016909 Weighted mode 6 -0.00117715931612494 0.15003852292961 0.994043502409107
ebi-a-GCST90016910 uDf6S8 Irritable bowel syndrome_R8 || id:ebi-a-GCST90016910 MR Egger 18 -0.0611874408115364 0.274537289268008 0.826453319635466
ebi-a-GCST90016910 uDf6S8 Irritable bowel syndrome_R8 || id:ebi-a-GCST90016910 Weighted median 18 -0.0461720744018254 0.113505665725558 0.684168026100643
ebi-a-GCST90016910 uDf6S8 Irritable bowel syndrome_R8 || id:ebi-a-GCST90016910 Inverse variance weighted 18 0.00756300998985127 0.0970693600545624 0.937896890068178
ebi-a-GCST90016910 uDf6S8 Irritable bowel syndrome_R8 || id:ebi-a-GCST90016910 Simple mode 18 -0.013005479907175 0.242323456051425 0.957823817173354
ebi-a-GCST90016910 uDf6S8 Irritable bowel syndrome_R8 || id:ebi-a-GCST90016910 Weighted mode 18 -0.10504947154823 0.215334157289567 0.631892458325722
ebi-a-GCST90016911 uDf6S8 Irritable bowel syndrome_R8 || id:ebi-a-GCST90016911 MR Egger 13 -0.160472491208372 0.184416747713395 0.402801393129191
ebi-a-GCST90016911 uDf6S8 Irritable bowel syndrome_R8 || id:ebi-a-GCST90016911 Weighted median 13 -0.096447519991944 0.11866219669559 0.41633811645671
ebi-a-GCST90016911 uDf6S8 Irritable bowel syndrome_R8 || id:ebi-a-GCST90016911 Inverse variance weighted 13 0.0463165826799466 0.0943234524652524 0.623398197349929
ebi-a-GCST90016911 uDf6S8 Irritable bowel syndrome_R8 || id:ebi-a-GCST90016911 Simple mode 13 -0.0882956226987267 0.183415504723013 0.638893782397316
ebi-a-GCST90016911 uDf6S8 Irritable bowel syndrome_R8 || id:ebi-a-GCST90016911 Weighted mode 13 -0.123330247845793 0.153352227188736 0.436907995695437
ebi-a-GCST90016912 uDf6S8 Irritable bowel syndrome_R8 || id:ebi-a-GCST90016912 MR Egger 10 -0.230740377051934 0.436443750351329 0.611374297518684
ebi-a-GCST90016912 uDf6S8 Irritable bowel syndrome_R8 || id:ebi-a-GCST90016912 Weighted median 10 -0.15028351606918 0.144674920677128 0.298913167863443
ebi-a-GCST90016912 uDf6S8 Irritable bowel syndrome_R8 || id:ebi-a-GCST90016912 Inverse variance weighted 10 -0.224514628344509 0.130314226371599 0.0849118184246365
ebi-a-GCST90016912 uDf6S8 Irritable bowel syndrome_R8 || id:ebi-a-GCST90016912 Simple mode 10 -0.167571181708913 0.235014552943204 0.493901941223975
ebi-a-GCST90016912 uDf6S8 Irritable bowel syndrome_R8 || id:ebi-a-GCST90016912 Weighted mode 10 -0.167571181708913 0.245574858256179 0.512187583287589
ebi-a-GCST90016913 uDf6S8 Irritable bowel syndrome_R8 || id:ebi-a-GCST90016913 MR Egger 11 -0.236028365247628 0.270505245920645 0.405587066480549
ebi-a-GCST90016913 uDf6S8 Irritable bowel syndrome_R8 || id:ebi-a-GCST90016913 Weighted median 11 0.0501656108383795 0.121637857023667 0.680033258136014
ebi-a-GCST90016913 uDf6S8 Irritable bowel syndrome_R8 || id:ebi-a-GCST90016913 Inverse variance weighted 11 -0.0569497998031335 0.100818574843031 0.572159414355415
ebi-a-GCST90016913 uDf6S8 Irritable bowel syndrome_R8 || id:ebi-a-GCST90016913 Simple mode 11 0.118598087862803 0.18490670193805 0.535689835628744
ebi-a-GCST90016913 uDf6S8 Irritable bowel syndrome_R8 || id:ebi-a-GCST90016913 Weighted mode 11 0.109878936995324 0.1835242911333 0.562678088797087
ebi-a-GCST90016914 uDf6S8 Irritable bowel syndrome_R8 || id:ebi-a-GCST90016914 MR Egger 18 0.357562839844443 0.309100528469144 0.264340006591704
ebi-a-GCST90016914 uDf6S8 Irritable bowel syndrome_R8 || id:ebi-a-GCST90016914 Weighted median 18 0.0121502563793913 0.102209585869973 0.905373676368639
ebi-a-GCST90016914 uDf6S8 Irritable bowel syndrome_R8 || id:ebi-a-GCST90016914 Inverse variance weighted 18 -0.00710662108424573 0.0750388614562878 0.924548450840757
ebi-a-GCST90016914 uDf6S8 Irritable bowel syndrome_R8 || id:ebi-a-GCST90016914 Simple mode 18 -0.210409586318463 0.183498567779788 0.267407710851888
ebi-a-GCST90016914 uDf6S8 Irritable bowel syndrome_R8 || id:ebi-a-GCST90016914 Weighted mode 18 -0.207625975711028 0.176337788708145 0.255244508264874
ebi-a-GCST90016915 uDf6S8 Irritable bowel syndrome_R8 || id:ebi-a-GCST90016915 MR Egger 12 0.455539292377575 0.410376296573015 0.292955463347842
ebi-a-GCST90016915 uDf6S8 Irritable bowel syndrome_R8 || id:ebi-a-GCST90016915 Weighted median 12 -0.0470358988869623 0.120832121775012 0.697079004229417
ebi-a-GCST90016915 uDf6S8 Irritable bowel syndrome_R8 || id:ebi-a-GCST90016915 Inverse variance weighted 12 0.0345326378671632 0.0909044203559068 0.704035582972578
ebi-a-GCST90016915 uDf6S8 Irritable bowel syndrome_R8 || id:ebi-a-GCST90016915 Simple mode 12 0.0128798873151048 0.208825489515634 0.951925864805903
ebi-a-GCST90016915 uDf6S8 Irritable bowel syndrome_R8 || id:ebi-a-GCST90016915 Weighted mode 12 -0.0289060132364418 0.197795290598767 0.886453796077255
ebi-a-GCST90016916 uDf6S8 Irritable bowel syndrome_R8 || id:ebi-a-GCST90016916 MR Egger 13 0.158082919524912 0.420787488479685 0.714296258880057
ebi-a-GCST90016916 uDf6S8 Irritable bowel syndrome_R8 || id:ebi-a-GCST90016916 Weighted median 13 -0.0167230887831046 0.136997066319919 0.902844407952792
ebi-a-GCST90016916 uDf6S8 Irritable bowel syndrome_R8 || id:ebi-a-GCST90016916 Inverse variance weighted 13 -0.089960789304941 0.0946065315174068 0.341658155065944
ebi-a-GCST90016916 uDf6S8 Irritable bowel syndrome_R8 || id:ebi-a-GCST90016916 Simple mode 13 0.124458360719411 0.238972176395887 0.611976584416681
ebi-a-GCST90016916 uDf6S8 Irritable bowel syndrome_R8 || id:ebi-a-GCST90016916 Weighted mode 13 0.111697675126595 0.247268659688024 0.659522400946625
ebi-a-GCST90016918 uDf6S8 Irritable bowel syndrome_R8 || id:ebi-a-GCST90016918 MR Egger 8 0.0687789398659038 0.245245569944396 0.788551731692387
ebi-a-GCST90016918 uDf6S8 Irritable bowel syndrome_R8 || id:ebi-a-GCST90016918 Weighted median 8 0.0442077722137443 0.0782100881589456 0.57190790711665
ebi-a-GCST90016918 uDf6S8 Irritable bowel syndrome_R8 || id:ebi-a-GCST90016918 Inverse variance weighted 8 0.0365990593449033 0.0637672677603842 0.566003376961007
ebi-a-GCST90016918 uDf6S8 Irritable bowel syndrome_R8 || id:ebi-a-GCST90016918 Simple mode 8 0.0811825138744892 0.13059079249383 0.553866643726376
ebi-a-GCST90016918 uDf6S8 Irritable bowel syndrome_R8 || id:ebi-a-GCST90016918 Weighted mode 8 0.0965467397841766 0.135424159445459 0.498964230776064
ebi-a-GCST90016919 uDf6S8 Irritable bowel syndrome_R8 || id:ebi-a-GCST90016919 MR Egger 10 0.0798425746898325 0.217869538742712 0.723517452428961
ebi-a-GCST90016919 uDf6S8 Irritable bowel syndrome_R8 || id:ebi-a-GCST90016919 Weighted median 10 0.011790270536943 0.0810254171154024 0.884305667188379
ebi-a-GCST90016919 uDf6S8 Irritable bowel syndrome_R8 || id:ebi-a-GCST90016919 Inverse variance weighted 10 0.00988941112124769 0.0681651437099483 0.884647569074614
ebi-a-GCST90016919 uDf6S8 Irritable bowel syndrome_R8 || id:ebi-a-GCST90016919 Simple mode 10 0.0206542544727449 0.114991651000227 0.861433474166671
ebi-a-GCST90016919 uDf6S8 Irritable bowel syndrome_R8 || id:ebi-a-GCST90016919 Weighted mode 10 0.0584040534427323 0.110882298114044 0.611120868816783
ebi-a-GCST90016920 uDf6S8 Irritable bowel syndrome_R8 || id:ebi-a-GCST90016920 MR Egger 9 -0.248906234690882 0.200909705085821 0.255311717562041
ebi-a-GCST90016920 uDf6S8 Irritable bowel syndrome_R8 || id:ebi-a-GCST90016920 Weighted median 9 0.0404645756869728 0.070622684305502 0.566666001364073
ebi-a-GCST90016920 uDf6S8 Irritable bowel syndrome_R8 || id:ebi-a-GCST90016920 Inverse variance weighted 9 0.0129277694908227 0.0519000888233277 0.803291516806253
ebi-a-GCST90016920 uDf6S8 Irritable bowel syndrome_R8 || id:ebi-a-GCST90016920 Simple mode 9 0.0444035773910018 0.101018610946372 0.671888908198905
ebi-a-GCST90016920 uDf6S8 Irritable bowel syndrome_R8 || id:ebi-a-GCST90016920 Weighted mode 9 0.0382070604775883 0.10291033031136 0.720079396404094
ebi-a-GCST90016921 uDf6S8 Irritable bowel syndrome_R8 || id:ebi-a-GCST90016921 MR Egger 12 0.121372235820735 0.247567868193096 0.634529150098296
ebi-a-GCST90016921 uDf6S8 Irritable bowel syndrome_R8 || id:ebi-a-GCST90016921 Weighted median 12 0.0305642201648841 0.0981257527966836 0.755435662141179
ebi-a-GCST90016921 uDf6S8 Irritable bowel syndrome_R8 || id:ebi-a-GCST90016921 Inverse variance weighted 12 -0.0508711961595357 0.0729033858920447 0.485309026979658
ebi-a-GCST90016921 uDf6S8 Irritable bowel syndrome_R8 || id:ebi-a-GCST90016921 Simple mode 12 0.0785399557367198 0.165143014371659 0.643672652026345
ebi-a-GCST90016921 uDf6S8 Irritable bowel syndrome_R8 || id:ebi-a-GCST90016921 Weighted mode 12 0.0656117583469307 0.144624001765914 0.658885057519664
ebi-a-GCST90016922 uDf6S8 Irritable bowel syndrome_R8 || id:ebi-a-GCST90016922 MR Egger 12 -0.161194807724445 0.334174029479196 0.639928926065661
ebi-a-GCST90016922 uDf6S8 Irritable bowel syndrome_R8 || id:ebi-a-GCST90016922 Weighted median 12 0.132303360576982 0.12679916563758 0.296759016683678
ebi-a-GCST90016922 uDf6S8 Irritable bowel syndrome_R8 || id:ebi-a-GCST90016922 Inverse variance weighted 12 0.0351052757950451 0.09443457019935 0.710085110190389
ebi-a-GCST90016922 uDf6S8 Irritable bowel syndrome_R8 || id:ebi-a-GCST90016922 Simple mode 12 0.278487490255986 0.249391016877547 0.28793337015658
ebi-a-GCST90016922 uDf6S8 Irritable bowel syndrome_R8 || id:ebi-a-GCST90016922 Weighted mode 12 0.285834591469519 0.264476910948464 0.30293168411183
ebi-a-GCST90016923 uDf6S8 Irritable bowel syndrome_R8 || id:ebi-a-GCST90016923 MR Egger 12 -0.310713436636855 0.333130448478606 0.372942769032606
ebi-a-GCST90016923 uDf6S8 Irritable bowel syndrome_R8 || id:ebi-a-GCST90016923 Weighted median 12 -0.135603399958016 0.112998567355848 0.230121746648085
ebi-a-GCST90016923 uDf6S8 Irritable bowel syndrome_R8 || id:ebi-a-GCST90016923 Inverse variance weighted 12 -0.0566101565210153 0.0939055819932894 0.546614315866236
ebi-a-GCST90016923 uDf6S8 Irritable bowel syndrome_R8 || id:ebi-a-GCST90016923 Simple mode 12 -0.190015676685274 0.238506130091085 0.442486528007955
ebi-a-GCST90016923 uDf6S8 Irritable bowel syndrome_R8 || id:ebi-a-GCST90016923 Weighted mode 12 -0.197944672152269 0.203027616708825 0.350531335986213
ebi-a-GCST90016924 uDf6S8 Irritable bowel syndrome_R8 || id:ebi-a-GCST90016924 MR Egger 7 -0.354412330050524 0.269625053444781 0.245754839072866
ebi-a-GCST90016924 uDf6S8 Irritable bowel syndrome_R8 || id:ebi-a-GCST90016924 Weighted median 7 -0.026451154969478 0.130171943212368 0.838977415269986
ebi-a-GCST90016924 uDf6S8 Irritable bowel syndrome_R8 || id:ebi-a-GCST90016924 Inverse variance weighted 7 -0.0167813422588559 0.0930110178474213 0.856820369361138
ebi-a-GCST90016924 uDf6S8 Irritable bowel syndrome_R8 || id:ebi-a-GCST90016924 Simple mode 7 0.00802872760800721 0.208172744284817 0.970486350408393
ebi-a-GCST90016924 uDf6S8 Irritable bowel syndrome_R8 || id:ebi-a-GCST90016924 Weighted mode 7 -0.20714096062716 0.243958172194367 0.428405445945312
ebi-a-GCST90016925 uDf6S8 Irritable bowel syndrome_R8 || id:ebi-a-GCST90016925 MR Egger 4 0.162144397883807 0.2117766900524 0.523906186918532
ebi-a-GCST90016925 uDf6S8 Irritable bowel syndrome_R8 || id:ebi-a-GCST90016925 Weighted median 4 0.129822672622081 0.109897583625712 0.237481192939214
ebi-a-GCST90016925 uDf6S8 Irritable bowel syndrome_R8 || id:ebi-a-GCST90016925 Inverse variance weighted 4 0.106975636704628 0.0970821904508473 0.270501695398001
ebi-a-GCST90016925 uDf6S8 Irritable bowel syndrome_R8 || id:ebi-a-GCST90016925 Simple mode 4 0.127808618984599 0.154435165668368 0.468590527184608
ebi-a-GCST90016925 uDf6S8 Irritable bowel syndrome_R8 || id:ebi-a-GCST90016925 Weighted mode 4 0.133521554357402 0.125134996146363 0.364207419390027
ebi-a-GCST90016927 uDf6S8 Irritable bowel syndrome_R8 || id:ebi-a-GCST90016927 MR Egger 8 0.129623670539829 0.5714618378126 0.828087979185215
ebi-a-GCST90016927 uDf6S8 Irritable bowel syndrome_R8 || id:ebi-a-GCST90016927 Weighted median 8 0.0718751381542404 0.136526788737335 0.598572478631397
ebi-a-GCST90016927 uDf6S8 Irritable bowel syndrome_R8 || id:ebi-a-GCST90016927 Inverse variance weighted 8 0.0190754069687721 0.108021654263272 0.859831445446225
ebi-a-GCST90016927 uDf6S8 Irritable bowel syndrome_R8 || id:ebi-a-GCST90016927 Simple mode 8 0.0907475837745743 0.216887313204295 0.688186180419205
ebi-a-GCST90016927 uDf6S8 Irritable bowel syndrome_R8 || id:ebi-a-GCST90016927 Weighted mode 8 0.121542045155587 0.197084400257125 0.556949239306603
ebi-a-GCST90016928 uDf6S8 Irritable bowel syndrome_R8 || id:ebi-a-GCST90016928 MR Egger 8 0.504844407032201 0.358567923477346 0.208790780566764
ebi-a-GCST90016928 uDf6S8 Irritable bowel syndrome_R8 || id:ebi-a-GCST90016928 Weighted median 8 0.0179346218076485 0.0956415614875452 0.851253631015153
ebi-a-GCST90016928 uDf6S8 Irritable bowel syndrome_R8 || id:ebi-a-GCST90016928 Inverse variance weighted 8 0.0846526187639223 0.0922562355812928 0.358837985711045
ebi-a-GCST90016928 uDf6S8 Irritable bowel syndrome_R8 || id:ebi-a-GCST90016928 Simple mode 8 -0.0138104736683149 0.134262913812976 0.920957723023414
ebi-a-GCST90016928 uDf6S8 Irritable bowel syndrome_R8 || id:ebi-a-GCST90016928 Weighted mode 8 -0.0138104736683149 0.119562368414718 0.911285789725452
ebi-a-GCST90016929 uDf6S8 Irritable bowel syndrome_R8 || id:ebi-a-GCST90016929 MR Egger 14 -0.600552272108766 0.266023311077947 0.0434048394787576
ebi-a-GCST90016929 uDf6S8 Irritable bowel syndrome_R8 || id:ebi-a-GCST90016929 Weighted median 14 -0.083365283506121 0.116537316419226 0.474391134387884
ebi-a-GCST90016929 uDf6S8 Irritable bowel syndrome_R8 || id:ebi-a-GCST90016929 Inverse variance weighted 14 -0.107774678318605 0.0826721979574222 0.192356792306408
ebi-a-GCST90016929 uDf6S8 Irritable bowel syndrome_R8 || id:ebi-a-GCST90016929 Simple mode 14 0.0447661538200476 0.207079043691081 0.832203359305672
ebi-a-GCST90016929 uDf6S8 Irritable bowel syndrome_R8 || id:ebi-a-GCST90016929 Weighted mode 14 -0.381188128587439 0.161455280010875 0.0345139368027763
ebi-a-GCST90016931 uDf6S8 Irritable bowel syndrome_R8 || id:ebi-a-GCST90016931 MR Egger 10 -0.321489468681913 0.256089187527434 0.244767152921506
ebi-a-GCST90016931 uDf6S8 Irritable bowel syndrome_R8 || id:ebi-a-GCST90016931 Weighted median 10 -0.0663831839455179 0.114253949526205 0.561230783752862
ebi-a-GCST90016931 uDf6S8 Irritable bowel syndrome_R8 || id:ebi-a-GCST90016931 Inverse variance weighted 10 -0.113902445348162 0.0879686024315381 0.195386490499231
ebi-a-GCST90016931 uDf6S8 Irritable bowel syndrome_R8 || id:ebi-a-GCST90016931 Simple mode 10 0.0169720056766299 0.187599809045361 0.929895822837368
ebi-a-GCST90016931 uDf6S8 Irritable bowel syndrome_R8 || id:ebi-a-GCST90016931 Weighted mode 10 -0.021965054266074 0.185427592151766 0.90830790388881
ebi-a-GCST90016932 uDf6S8 Irritable bowel syndrome_R8 || id:ebi-a-GCST90016932 MR Egger 15 0.0513714224019752 0.204253040465316 0.8053528521122
ebi-a-GCST90016932 uDf6S8 Irritable bowel syndrome_R8 || id:ebi-a-GCST90016932 Weighted median 15 0.0952824580765783 0.0880670932066514 0.279283492394469
ebi-a-GCST90016932 uDf6S8 Irritable bowel syndrome_R8 || id:ebi-a-GCST90016932 Inverse variance weighted 15 0.0218850498176638 0.0719588629276421 0.761026725762462
ebi-a-GCST90016932 uDf6S8 Irritable bowel syndrome_R8 || id:ebi-a-GCST90016932 Simple mode 15 0.0926236814644568 0.130091531106876 0.488167806064393
ebi-a-GCST90016932 uDf6S8 Irritable bowel syndrome_R8 || id:ebi-a-GCST90016932 Weighted mode 15 0.0891686081608483 0.112806190171797 0.44244474854732
ebi-a-GCST90016933 uDf6S8 Irritable bowel syndrome_R8 || id:ebi-a-GCST90016933 MR Egger 18 0.357562839844443 0.309100528469144 0.264340006591704
ebi-a-GCST90016933 uDf6S8 Irritable bowel syndrome_R8 || id:ebi-a-GCST90016933 Weighted median 18 0.0121502563793913 0.104785039423684 0.907688908334445
ebi-a-GCST90016933 uDf6S8 Irritable bowel syndrome_R8 || id:ebi-a-GCST90016933 Inverse variance weighted 18 -0.00710662108424573 0.0750388614562878 0.924548450840757
ebi-a-GCST90016933 uDf6S8 Irritable bowel syndrome_R8 || id:ebi-a-GCST90016933 Simple mode 18 -0.210409586318463 0.19619137203911 0.298497653338193
ebi-a-GCST90016933 uDf6S8 Irritable bowel syndrome_R8 || id:ebi-a-GCST90016933 Weighted mode 18 -0.207625975711028 0.182552656264344 0.271169956757338
ebi-a-GCST90016934 uDf6S8 Irritable bowel syndrome_R8 || id:ebi-a-GCST90016934 MR Egger 11 0.230374623515233 0.23929433800979 0.360837207585208
ebi-a-GCST90016934 uDf6S8 Irritable bowel syndrome_R8 || id:ebi-a-GCST90016934 Weighted median 11 0.148106083013567 0.0995316984290672 0.136743168171926
ebi-a-GCST90016934 uDf6S8 Irritable bowel syndrome_R8 || id:ebi-a-GCST90016934 Inverse variance weighted 11 0.0649478671044961 0.0684388374704063 0.342624994095301
ebi-a-GCST90016934 uDf6S8 Irritable bowel syndrome_R8 || id:ebi-a-GCST90016934 Simple mode 11 0.155653825052758 0.164906966366856 0.367472325414301
ebi-a-GCST90016934 uDf6S8 Irritable bowel syndrome_R8 || id:ebi-a-GCST90016934 Weighted mode 11 0.167378669700533 0.153584771498759 0.301359898076771
ebi-a-GCST90016935 uDf6S8 Irritable bowel syndrome_R8 || id:ebi-a-GCST90016935 MR Egger 9 0.558374923961471 0.477521440105219 0.280546344346813
ebi-a-GCST90016935 uDf6S8 Irritable bowel syndrome_R8 || id:ebi-a-GCST90016935 Weighted median 9 0.0169604594984845 0.137654878999511 0.901940796369904
ebi-a-GCST90016935 uDf6S8 Irritable bowel syndrome_R8 || id:ebi-a-GCST90016935 Inverse variance weighted 9 0.0342488079959805 0.117976649803332 0.77158552920127
ebi-a-GCST90016935 uDf6S8 Irritable bowel syndrome_R8 || id:ebi-a-GCST90016935 Simple mode 9 0.11542079550335 0.238871685892342 0.641906131031408
ebi-a-GCST90016935 uDf6S8 Irritable bowel syndrome_R8 || id:ebi-a-GCST90016935 Weighted mode 9 -0.0409994970426075 0.226180481916202 0.860664860505931
ebi-a-GCST90016936 uDf6S8 Irritable bowel syndrome_R8 || id:ebi-a-GCST90016936 MR Egger 7 -0.519106148140952 0.660965719969075 0.46779830936978
ebi-a-GCST90016936 uDf6S8 Irritable bowel syndrome_R8 || id:ebi-a-GCST90016936 Weighted median 7 0.0471755621985515 0.140076415704821 0.736279376845227
ebi-a-GCST90016936 uDf6S8 Irritable bowel syndrome_R8 || id:ebi-a-GCST90016936 Inverse variance weighted 7 -0.044462846877275 0.110501615870467 0.687409669466555
ebi-a-GCST90016936 uDf6S8 Irritable bowel syndrome_R8 || id:ebi-a-GCST90016936 Simple mode 7 0.0628263072643906 0.183469942288121 0.743701545030025
ebi-a-GCST90016936 uDf6S8 Irritable bowel syndrome_R8 || id:ebi-a-GCST90016936 Weighted mode 7 0.0615047201591415 0.195747134843101 0.764003542476966
ebi-a-GCST90016937 uDf6S8 Irritable bowel syndrome_R8 || id:ebi-a-GCST90016937 MR Egger 13 0.158082919524912 0.420787488479685 0.714296258880057
ebi-a-GCST90016937 uDf6S8 Irritable bowel syndrome_R8 || id:ebi-a-GCST90016937 Weighted median 13 -0.0167230887831046 0.131411960406953 0.898737011009794
ebi-a-GCST90016937 uDf6S8 Irritable bowel syndrome_R8 || id:ebi-a-GCST90016937 Inverse variance weighted 13 -0.089960789304941 0.0946065315174068 0.341658155065944
ebi-a-GCST90016937 uDf6S8 Irritable bowel syndrome_R8 || id:ebi-a-GCST90016937 Simple mode 13 0.124458360719411 0.251343955409374 0.629421659396284
ebi-a-GCST90016937 uDf6S8 Irritable bowel syndrome_R8 || id:ebi-a-GCST90016937 Weighted mode 13 0.111697675126595 0.238094709768193 0.647384454878772
ebi-a-GCST90016938 uDf6S8 Irritable bowel syndrome_R8 || id:ebi-a-GCST90016938 MR Egger 8 -0.146251093199828 0.4132160993181 0.735494052501155
ebi-a-GCST90016938 uDf6S8 Irritable bowel syndrome_R8 || id:ebi-a-GCST90016938 Weighted median 8 -0.0427694133113613 0.0653541006234316 0.512837480195802
ebi-a-GCST90016938 uDf6S8 Irritable bowel syndrome_R8 || id:ebi-a-GCST90016938 Inverse variance weighted 8 0.0463980640946518 0.0612123140749481 0.448459491075619
ebi-a-GCST90016938 uDf6S8 Irritable bowel syndrome_R8 || id:ebi-a-GCST90016938 Simple mode 8 -0.080519825111363 0.103877333581553 0.463630704382763
ebi-a-GCST90016938 uDf6S8 Irritable bowel syndrome_R8 || id:ebi-a-GCST90016938 Weighted mode 8 -0.0770730813234861 0.108230107442765 0.499429004161989
ebi-a-GCST90016940 uDf6S8 Irritable bowel syndrome_R8 || id:ebi-a-GCST90016940 MR Egger 16 0.315222168091149 0.310237706632733 0.326836499446762
ebi-a-GCST90016940 uDf6S8 Irritable bowel syndrome_R8 || id:ebi-a-GCST90016940 Weighted median 16 0.267173108950804 0.118639911272356 0.024324387394305
ebi-a-GCST90016940 uDf6S8 Irritable bowel syndrome_R8 || id:ebi-a-GCST90016940 Inverse variance weighted 16 0.167659007337821 0.0868900651593406 0.0536622165186574
ebi-a-GCST90016940 uDf6S8 Irritable bowel syndrome_R8 || id:ebi-a-GCST90016940 Simple mode 16 0.324538212264508 0.204347690789139 0.13310017065389
ebi-a-GCST90016940 uDf6S8 Irritable bowel syndrome_R8 || id:ebi-a-GCST90016940 Weighted mode 16 0.315855920249405 0.204708995973442 0.143673772189696
ebi-a-GCST90016941 uDf6S8 Irritable bowel syndrome_R8 || id:ebi-a-GCST90016941 MR Egger 9 0.132537490414932 0.150651407030679 0.408173253605441
ebi-a-GCST90016941 uDf6S8 Irritable bowel syndrome_R8 || id:ebi-a-GCST90016941 Weighted median 9 -0.0283705662440799 0.0836941560561158 0.734625505880099
ebi-a-GCST90016941 uDf6S8 Irritable bowel syndrome_R8 || id:ebi-a-GCST90016941 Inverse variance weighted 9 -0.0163830767865756 0.0611459462376323 0.788750136740844
ebi-a-GCST90016941 uDf6S8 Irritable bowel syndrome_R8 || id:ebi-a-GCST90016941 Simple mode 9 -0.0698843488377956 0.130329992856812 0.606396760480092
ebi-a-GCST90016941 uDf6S8 Irritable bowel syndrome_R8 || id:ebi-a-GCST90016941 Weighted mode 9 0.00281353532681028 0.104284379118451 0.979136992534051
ebi-a-GCST90016942 uDf6S8 Irritable bowel syndrome_R8 || id:ebi-a-GCST90016942 MR Egger 9 -0.248906234690882 0.200909705085821 0.255311717562041
ebi-a-GCST90016942 uDf6S8 Irritable bowel syndrome_R8 || id:ebi-a-GCST90016942 Weighted median 9 0.0404645756869728 0.0673287079556643 0.547839766631149
ebi-a-GCST90016942 uDf6S8 Irritable bowel syndrome_R8 || id:ebi-a-GCST90016942 Inverse variance weighted 9 0.0129277694908227 0.0519000888233277 0.803291516806253
ebi-a-GCST90016942 uDf6S8 Irritable bowel syndrome_R8 || id:ebi-a-GCST90016942 Simple mode 9 0.0444035773910018 0.103987937815397 0.680633922827713
ebi-a-GCST90016942 uDf6S8 Irritable bowel syndrome_R8 || id:ebi-a-GCST90016942 Weighted mode 9 0.0382070604775883 0.102031885497673 0.717791719040232
ebi-a-GCST90016943 uDf6S8 Irritable bowel syndrome_R8 || id:ebi-a-GCST90016943 MR Egger 14 0.0979803423813073 0.172445970995288 0.580389401960219
ebi-a-GCST90016943 uDf6S8 Irritable bowel syndrome_R8 || id:ebi-a-GCST90016943 Weighted median 14 -0.0428007589055533 0.0577772682651298 0.458821447489838
ebi-a-GCST90016943 uDf6S8 Irritable bowel syndrome_R8 || id:ebi-a-GCST90016943 Inverse variance weighted 14 -0.0453988069765893 0.0446271215551809 0.309014613276047
ebi-a-GCST90016943 uDf6S8 Irritable bowel syndrome_R8 || id:ebi-a-GCST90016943 Simple mode 14 -0.0639239018911095 0.096607110789982 0.519727188083091
ebi-a-GCST90016943 uDf6S8 Irritable bowel syndrome_R8 || id:ebi-a-GCST90016943 Weighted mode 14 -0.0586467522611829 0.0880274317631352 0.516911508839736
ebi-a-GCST90016944 uDf6S8 Irritable bowel syndrome_R8 || id:ebi-a-GCST90016944 MR Egger 13 0.240366036814536 0.119913403496424 0.0702604094987495
ebi-a-GCST90016944 uDf6S8 Irritable bowel syndrome_R8 || id:ebi-a-GCST90016944 Weighted median 13 -0.00681154176661719 0.0782831846231124 0.930662325938609
ebi-a-GCST90016944 uDf6S8 Irritable bowel syndrome_R8 || id:ebi-a-GCST90016944 Inverse variance weighted 13 0.0392280179901754 0.055982497480224 0.483478191837225
ebi-a-GCST90016944 uDf6S8 Irritable bowel syndrome_R8 || id:ebi-a-GCST90016944 Simple mode 13 -0.140370175725557 0.170273571482606 0.425806486574676
ebi-a-GCST90016944 uDf6S8 Irritable bowel syndrome_R8 || id:ebi-a-GCST90016944 Weighted mode 13 0.200810250114595 0.117578935886006 0.11337486687885
ebi-a-GCST90016945 uDf6S8 Irritable bowel syndrome_R8 || id:ebi-a-GCST90016945 MR Egger 10 -0.180045060462962 0.203705469081617 0.402556948241299
ebi-a-GCST90016945 uDf6S8 Irritable bowel syndrome_R8 || id:ebi-a-GCST90016945 Weighted median 10 -0.0500068052309561 0.0975758953730327 0.608307151949325
ebi-a-GCST90016945 uDf6S8 Irritable bowel syndrome_R8 || id:ebi-a-GCST90016945 Inverse variance weighted 10 -0.0945635876005574 0.0725448455679091 0.192397619706745
ebi-a-GCST90016945 uDf6S8 Irritable bowel syndrome_R8 || id:ebi-a-GCST90016945 Simple mode 10 0.00782635124676945 0.160808918952881 0.962246297659817
ebi-a-GCST90016945 uDf6S8 Irritable bowel syndrome_R8 || id:ebi-a-GCST90016945 Weighted mode 10 -0.00290329267357947 0.15237738687588 0.985214299843911
ebi-a-GCST90016946 uDf6S8 Irritable bowel syndrome_R8 || id:ebi-a-GCST90016946 MR Egger 13 -0.210411384599405 0.165190862593044 0.229008776830086
ebi-a-GCST90016946 uDf6S8 Irritable bowel syndrome_R8 || id:ebi-a-GCST90016946 Weighted median 13 -0.0414601051105354 0.102162886291667 0.684872254313602
ebi-a-GCST90016946 uDf6S8 Irritable bowel syndrome_R8 || id:ebi-a-GCST90016946 Inverse variance weighted 13 0.0577545352262978 0.0737357574515538 0.433472330598554
ebi-a-GCST90016946 uDf6S8 Irritable bowel syndrome_R8 || id:ebi-a-GCST90016946 Simple mode 13 -0.0704053160470609 0.168628037227193 0.683672367279306
ebi-a-GCST90016946 uDf6S8 Irritable bowel syndrome_R8 || id:ebi-a-GCST90016946 Weighted mode 13 -0.0811563455465925 0.136698941222014 0.563745463400459
ebi-a-GCST90016949 uDf6S8 Irritable bowel syndrome_R8 || id:ebi-a-GCST90016949 MR Egger 14 0.116530482668471 0.236365862811219 0.630904235320831
ebi-a-GCST90016949 uDf6S8 Irritable bowel syndrome_R8 || id:ebi-a-GCST90016949 Weighted median 14 0.0374507974737662 0.0738616183184096 0.612126728768816
ebi-a-GCST90016949 uDf6S8 Irritable bowel syndrome_R8 || id:ebi-a-GCST90016949 Inverse variance weighted 14 -0.00861543973401752 0.0578202028891995 0.881550500913865
ebi-a-GCST90016949 uDf6S8 Irritable bowel syndrome_R8 || id:ebi-a-GCST90016949 Simple mode 14 0.0553040184519366 0.120253359929254 0.653188045507996
ebi-a-GCST90016949 uDf6S8 Irritable bowel syndrome_R8 || id:ebi-a-GCST90016949 Weighted mode 14 0.0498361172877324 0.116977218425865 0.677053201696663
ebi-a-GCST90016950 uDf6S8 Irritable bowel syndrome_R8 || id:ebi-a-GCST90016950 MR Egger 18 -0.220204251875647 0.233106145052681 0.358884276626516
ebi-a-GCST90016950 uDf6S8 Irritable bowel syndrome_R8 || id:ebi-a-GCST90016950 Weighted median 18 0.0406950876102205 0.104866993858772 0.697968795668038
ebi-a-GCST90016950 uDf6S8 Irritable bowel syndrome_R8 || id:ebi-a-GCST90016950 Inverse variance weighted 18 0.0209930028854845 0.0750488177455256 0.779688779238694
ebi-a-GCST90016950 uDf6S8 Irritable bowel syndrome_R8 || id:ebi-a-GCST90016950 Simple mode 18 0.169562882735654 0.207249344914494 0.424586576045377
ebi-a-GCST90016950 uDf6S8 Irritable bowel syndrome_R8 || id:ebi-a-GCST90016950 Weighted mode 18 0.17786138566576 0.186639506544918 0.353961024582476
ebi-a-GCST90016951 uDf6S8 Irritable bowel syndrome_R8 || id:ebi-a-GCST90016951 MR Egger 10 -0.0383661496312416 0.191969943573052 0.84658066056507
ebi-a-GCST90016951 uDf6S8 Irritable bowel syndrome_R8 || id:ebi-a-GCST90016951 Weighted median 10 -0.0981635946109398 0.114834469551889 0.392646979087873
ebi-a-GCST90016951 uDf6S8 Irritable bowel syndrome_R8 || id:ebi-a-GCST90016951 Inverse variance weighted 10 -0.131100921534219 0.0888049027305178 0.139868681295343
ebi-a-GCST90016951 uDf6S8 Irritable bowel syndrome_R8 || id:ebi-a-GCST90016951 Simple mode 10 -0.0271038453637984 0.169934843208791 0.876800504429516
ebi-a-GCST90016951 uDf6S8 Irritable bowel syndrome_R8 || id:ebi-a-GCST90016951 Weighted mode 10 -0.0682101585573499 0.154526573237702 0.669327960317175
ebi-a-GCST90016952 uDf6S8 Irritable bowel syndrome_R8 || id:ebi-a-GCST90016952 MR Egger 13 -0.627486787218556 0.479034218571164 0.216925539510938
ebi-a-GCST90016952 uDf6S8 Irritable bowel syndrome_R8 || id:ebi-a-GCST90016952 Weighted median 13 -0.0519136134193049 0.138261575810256 0.707308051951743
ebi-a-GCST90016952 uDf6S8 Irritable bowel syndrome_R8 || id:ebi-a-GCST90016952 Inverse variance weighted 13 -0.0252053938856633 0.120022301187048 0.833663051895522
ebi-a-GCST90016952 uDf6S8 Irritable bowel syndrome_R8 || id:ebi-a-GCST90016952 Simple mode 13 -0.250884126575299 0.296154334657606 0.413493806345704
ebi-a-GCST90016952 uDf6S8 Irritable bowel syndrome_R8 || id:ebi-a-GCST90016952 Weighted mode 13 -0.190787410295142 0.293740293204828 0.528245412995333
ebi-a-GCST90016953 uDf6S8 Irritable bowel syndrome_R8 || id:ebi-a-GCST90016953 MR Egger 9 -0.112612674245742 0.227213422737452 0.63533811432346
ebi-a-GCST90016953 uDf6S8 Irritable bowel syndrome_R8 || id:ebi-a-GCST90016953 Weighted median 9 0.110229737263031 0.0803018569166142 0.16984803713661
ebi-a-GCST90016953 uDf6S8 Irritable bowel syndrome_R8 || id:ebi-a-GCST90016953 Inverse variance weighted 9 0.0877646330614612 0.0754253182296949 0.244587587900429
ebi-a-GCST90016953 uDf6S8 Irritable bowel syndrome_R8 || id:ebi-a-GCST90016953 Simple mode 9 0.0475885467144047 0.121977383279867 0.706613448929234
ebi-a-GCST90016953 uDf6S8 Irritable bowel syndrome_R8 || id:ebi-a-GCST90016953 Weighted mode 9 0.0747535298826735 0.100769908225279 0.479403645144409
ebi-a-GCST90016954 uDf6S8 Irritable bowel syndrome_R8 || id:ebi-a-GCST90016954 MR Egger 12 0.0357679281862583 0.21245952417205 0.869662879469293
ebi-a-GCST90016954 uDf6S8 Irritable bowel syndrome_R8 || id:ebi-a-GCST90016954 Weighted median 12 0.0511470056764351 0.090165395208993 0.570539179415191
ebi-a-GCST90016954 uDf6S8 Irritable bowel syndrome_R8 || id:ebi-a-GCST90016954 Inverse variance weighted 12 0.0315931989359866 0.0697338320726445 0.650509781581688
ebi-a-GCST90016954 uDf6S8 Irritable bowel syndrome_R8 || id:ebi-a-GCST90016954 Simple mode 12 0.0839129842849734 0.143368254639764 0.570160147774417
ebi-a-GCST90016954 uDf6S8 Irritable bowel syndrome_R8 || id:ebi-a-GCST90016954 Weighted mode 12 0.0665799277700365 0.132634713022928 0.625577614636656
ebi-a-GCST90016955 uDf6S8 Irritable bowel syndrome_R8 || id:ebi-a-GCST90016955 MR Egger 12 0.0736629142531808 0.199705478642404 0.719923355573212
ebi-a-GCST90016955 uDf6S8 Irritable bowel syndrome_R8 || id:ebi-a-GCST90016955 Weighted median 12 0.0830016789730922 0.0666225443985462 0.212819568294391
ebi-a-GCST90016955 uDf6S8 Irritable bowel syndrome_R8 || id:ebi-a-GCST90016955 Inverse variance weighted 12 0.0812569601058983 0.0491632606901622 0.098371893633129
ebi-a-GCST90016955 uDf6S8 Irritable bowel syndrome_R8 || id:ebi-a-GCST90016955 Simple mode 12 0.0814433622870309 0.121493914797541 0.516461798952814
ebi-a-GCST90016955 uDf6S8 Irritable bowel syndrome_R8 || id:ebi-a-GCST90016955 Weighted mode 12 0.0832094364385815 0.118883183066992 0.49850887599582
ebi-a-GCST90016956 uDf6S8 Irritable bowel syndrome_R8 || id:ebi-a-GCST90016956 MR Egger 18 0.18588081662298 0.126503732642848 0.161120438623396
ebi-a-GCST90016956 uDf6S8 Irritable bowel syndrome_R8 || id:ebi-a-GCST90016956 Weighted median 18 -0.0825183402557961 0.0928352934474558 0.37407391715471
ebi-a-GCST90016956 uDf6S8 Irritable bowel syndrome_R8 || id:ebi-a-GCST90016956 Inverse variance weighted 18 -0.0395016226982818 0.0687057934854493 0.565332724915299
ebi-a-GCST90016956 uDf6S8 Irritable bowel syndrome_R8 || id:ebi-a-GCST90016956 Simple mode 18 -0.0620281494966222 0.161745947863263 0.706109170946031
ebi-a-GCST90016956 uDf6S8 Irritable bowel syndrome_R8 || id:ebi-a-GCST90016956 Weighted mode 18 -0.0706896013409708 0.141663099504544 0.624176213958876
ebi-a-GCST90016957 uDf6S8 Irritable bowel syndrome_R8 || id:ebi-a-GCST90016957 MR Egger 12 -0.311873264343383 0.333093694593607 0.371182446154595
ebi-a-GCST90016957 uDf6S8 Irritable bowel syndrome_R8 || id:ebi-a-GCST90016957 Weighted median 12 -0.135828490439735 0.111097998010581 0.221480547579248
ebi-a-GCST90016957 uDf6S8 Irritable bowel syndrome_R8 || id:ebi-a-GCST90016957 Inverse variance weighted 12 -0.0567045239642726 0.0939109205564358 0.545968759317985
ebi-a-GCST90016957 uDf6S8 Irritable bowel syndrome_R8 || id:ebi-a-GCST90016957 Simple mode 12 -0.189651429036308 0.239371808925822 0.44494364713309
ebi-a-GCST90016957 uDf6S8 Irritable bowel syndrome_R8 || id:ebi-a-GCST90016957 Weighted mode 12 -0.197583729265897 0.206918948598807 0.360150048653897
ebi-a-GCST90016958 uDf6S8 Irritable bowel syndrome_R8 || id:ebi-a-GCST90016958 MR Egger 11 -0.267050828877773 0.248732416967102 0.310922416363992
ebi-a-GCST90016958 uDf6S8 Irritable bowel syndrome_R8 || id:ebi-a-GCST90016958 Weighted median 11 -0.0296694229496686 0.0647475395645579 0.646785456996508
ebi-a-GCST90016958 uDf6S8 Irritable bowel syndrome_R8 || id:ebi-a-GCST90016958 Inverse variance weighted 11 0.0385712271228295 0.0552412603102204 0.485031987648664
ebi-a-GCST90016958 uDf6S8 Irritable bowel syndrome_R8 || id:ebi-a-GCST90016958 Simple mode 11 -0.0580904501074364 0.0994560189429126 0.572104660283168
ebi-a-GCST90016958 uDf6S8 Irritable bowel syndrome_R8 || id:ebi-a-GCST90016958 Weighted mode 11 -0.0643906773274847 0.0852184608592141 0.467316378814732
ebi-a-GCST90016959 uDf6S8 Irritable bowel syndrome_R8 || id:ebi-a-GCST90016959 MR Egger 7 0.22375338982752 0.343698837504977 0.543765435804177
ebi-a-GCST90016959 uDf6S8 Irritable bowel syndrome_R8 || id:ebi-a-GCST90016959 Weighted median 7 0.123876127556044 0.109034297139785 0.255906031484137
ebi-a-GCST90016959 uDf6S8 Irritable bowel syndrome_R8 || id:ebi-a-GCST90016959 Inverse variance weighted 7 -0.0128084671619897 0.135561560476887 0.924724289288063
ebi-a-GCST90016959 uDf6S8 Irritable bowel syndrome_R8 || id:ebi-a-GCST90016959 Simple mode 7 0.108381218281375 0.136103443409673 0.456191774318746
ebi-a-GCST90016959 uDf6S8 Irritable bowel syndrome_R8 || id:ebi-a-GCST90016959 Weighted mode 7 0.108381218281375 0.121170627192013 0.405528923107964
ebi-a-GCST90016960 uDf6S8 Irritable bowel syndrome_R8 || id:ebi-a-GCST90016960 MR Egger 8 0.490735692728806 0.449940883088487 0.317270679620354
ebi-a-GCST90016960 uDf6S8 Irritable bowel syndrome_R8 || id:ebi-a-GCST90016960 Weighted median 8 -0.0884660986110818 0.104575251969066 0.397577094432109
ebi-a-GCST90016960 uDf6S8 Irritable bowel syndrome_R8 || id:ebi-a-GCST90016960 Inverse variance weighted 8 0.0291162218806921 0.102034093710394 0.775370054425688
ebi-a-GCST90016960 uDf6S8 Irritable bowel syndrome_R8 || id:ebi-a-GCST90016960 Simple mode 8 -0.150531446299702 0.160348743566678 0.379100143374977
ebi-a-GCST90016960 uDf6S8 Irritable bowel syndrome_R8 || id:ebi-a-GCST90016960 Weighted mode 8 -0.153517826687762 0.150111359220225 0.340490196412629
ebi-a-GCST90016961 uDf6S8 Irritable bowel syndrome_R8 || id:ebi-a-GCST90016961 MR Egger 12 -0.314491681809368 0.332519486090162 0.366550655931411
ebi-a-GCST90016961 uDf6S8 Irritable bowel syndrome_R8 || id:ebi-a-GCST90016961 Weighted median 12 -0.136679103520253 0.107692706179371 0.20438457193517
ebi-a-GCST90016961 uDf6S8 Irritable bowel syndrome_R8 || id:ebi-a-GCST90016961 Inverse variance weighted 12 -0.0569473077245115 0.0938773274273202 0.54410706024089
ebi-a-GCST90016961 uDf6S8 Irritable bowel syndrome_R8 || id:ebi-a-GCST90016961 Simple mode 12 -0.188312806580822 0.235188607848014 0.440263318569539
ebi-a-GCST90016961 uDf6S8 Irritable bowel syndrome_R8 || id:ebi-a-GCST90016961 Weighted mode 12 -0.196245931424028 0.206388002431979 0.362100921485683
ebi-a-GCST90016962 uDf6S8 Irritable bowel syndrome_R8 || id:ebi-a-GCST90016962 MR Egger 12 -0.00779904666444101 0.476337413133772 0.987258925191596
ebi-a-GCST90016962 uDf6S8 Irritable bowel syndrome_R8 || id:ebi-a-GCST90016962 Weighted median 12 0.0142906170683153 0.131251505781616 0.913297953320296
ebi-a-GCST90016962 uDf6S8 Irritable bowel syndrome_R8 || id:ebi-a-GCST90016962 Inverse variance weighted 12 0.0514761586248665 0.0999751268301761 0.606630129828727
ebi-a-GCST90016962 uDf6S8 Irritable bowel syndrome_R8 || id:ebi-a-GCST90016962 Simple mode 12 0.0247146325637536 0.21373148381521 0.910026537059338
ebi-a-GCST90016962 uDf6S8 Irritable bowel syndrome_R8 || id:ebi-a-GCST90016962 Weighted mode 12 0.0175005317525934 0.207965479276134 0.934448230655906
ebi-a-GCST90016963 uDf6S8 Irritable bowel syndrome_R8 || id:ebi-a-GCST90016963 MR Egger 8 -0.0369186004227728 0.334538487508796 0.915725158171874
ebi-a-GCST90016963 uDf6S8 Irritable bowel syndrome_R8 || id:ebi-a-GCST90016963 Weighted median 8 0.0330832937773757 0.0632371915111543 0.600861542855715
ebi-a-GCST90016963 uDf6S8 Irritable bowel syndrome_R8 || id:ebi-a-GCST90016963 Inverse variance weighted 8 0.0334409463095885 0.0471241007518466 0.477930047863944
ebi-a-GCST90016963 uDf6S8 Irritable bowel syndrome_R8 || id:ebi-a-GCST90016963 Simple mode 8 0.0430909952847874 0.099421267175901 0.677753509002975
ebi-a-GCST90016963 uDf6S8 Irritable bowel syndrome_R8 || id:ebi-a-GCST90016963 Weighted mode 8 0.0269577761732179 0.0875984689303338 0.767232889413549
ebi-a-GCST90016964 uDf6S8 Irritable bowel syndrome_R8 || id:ebi-a-GCST90016964 MR Egger 5 -0.207799001503642 0.575151904602949 0.741825178988079
ebi-a-GCST90016964 uDf6S8 Irritable bowel syndrome_R8 || id:ebi-a-GCST90016964 Weighted median 5 0.0309074557810141 0.0820575347734695 0.706429329209181
ebi-a-GCST90016964 uDf6S8 Irritable bowel syndrome_R8 || id:ebi-a-GCST90016964 Inverse variance weighted 5 -0.0103174770025724 0.0598822322024654 0.863204724855119
ebi-a-GCST90016964 uDf6S8 Irritable bowel syndrome_R8 || id:ebi-a-GCST90016964 Simple mode 5 0.0373552191224725 0.109769344551959 0.75074644801796
ebi-a-GCST90016964 uDf6S8 Irritable bowel syndrome_R8 || id:ebi-a-GCST90016964 Weighted mode 5 0.035775221848055 0.109849998267108 0.760996018817678
ebi-a-GCST90016965 uDf6S8 Irritable bowel syndrome_R8 || id:ebi-a-GCST90016965 MR Egger 10 0.0524814351124572 0.305519114674166 0.867877884530647
ebi-a-GCST90016965 uDf6S8 Irritable bowel syndrome_R8 || id:ebi-a-GCST90016965 Weighted median 10 -0.014684182309525 0.0722054231825925 0.838848385710792
ebi-a-GCST90016965 uDf6S8 Irritable bowel syndrome_R8 || id:ebi-a-GCST90016965 Inverse variance weighted 10 -0.0312346985973126 0.0544305652501018 0.566072807593365
ebi-a-GCST90016965 uDf6S8 Irritable bowel syndrome_R8 || id:ebi-a-GCST90016965 Simple mode 10 0.0591412607654234 0.141885516085467 0.68657319749845
ebi-a-GCST90016965 uDf6S8 Irritable bowel syndrome_R8 || id:ebi-a-GCST90016965 Weighted mode 10 0.0374718456175792 0.127977836075611 0.776313857808035
ebi-a-GCST90016966 uDf6S8 Irritable bowel syndrome_R8 || id:ebi-a-GCST90016966 MR Egger 13 -0.00763179674447858 0.35723921068893 0.983338471724559
ebi-a-GCST90016966 uDf6S8 Irritable bowel syndrome_R8 || id:ebi-a-GCST90016966 Weighted median 13 0.078430206099413 0.127502243480004 0.538470160622018
ebi-a-GCST90016966 uDf6S8 Irritable bowel syndrome_R8 || id:ebi-a-GCST90016966 Inverse variance weighted 13 0.0292478165373151 0.094530163896701 0.757015791304718
ebi-a-GCST90016966 uDf6S8 Irritable bowel syndrome_R8 || id:ebi-a-GCST90016966 Simple mode 13 0.120104467561623 0.223747026337911 0.601225556962032
ebi-a-GCST90016966 uDf6S8 Irritable bowel syndrome_R8 || id:ebi-a-GCST90016966 Weighted mode 13 0.115746473552812 0.233017108944527 0.628354576972819
ebi-a-GCST90016967 uDf6S8 Irritable bowel syndrome_R8 || id:ebi-a-GCST90016967 MR Egger 13 -0.0593198489327114 0.250149507129208 0.816908569702435
ebi-a-GCST90016967 uDf6S8 Irritable bowel syndrome_R8 || id:ebi-a-GCST90016967 Weighted median 13 -0.150579283598932 0.12104030423248 0.213483918775548
ebi-a-GCST90016967 uDf6S8 Irritable bowel syndrome_R8 || id:ebi-a-GCST90016967 Inverse variance weighted 13 -0.146960066673389 0.0855849697398386 0.0859563875250872
ebi-a-GCST90016967 uDf6S8 Irritable bowel syndrome_R8 || id:ebi-a-GCST90016967 Simple mode 13 -0.183864975546788 0.187472763274608 0.346073377433092
ebi-a-GCST90016967 uDf6S8 Irritable bowel syndrome_R8 || id:ebi-a-GCST90016967 Weighted mode 13 -0.133012258407188 0.169611593807561 0.448117005541893
ebi-a-GCST90016968 uDf6S8 Irritable bowel syndrome_R8 || id:ebi-a-GCST90016968 MR Egger 8 0.129623670539829 0.5714618378126 0.828087979185215
ebi-a-GCST90016968 uDf6S8 Irritable bowel syndrome_R8 || id:ebi-a-GCST90016968 Weighted median 8 0.0718751381542404 0.136879330223863 0.599514682378986
ebi-a-GCST90016968 uDf6S8 Irritable bowel syndrome_R8 || id:ebi-a-GCST90016968 Inverse variance weighted 8 0.0190754069687721 0.108021654263272 0.859831445446225
ebi-a-GCST90016968 uDf6S8 Irritable bowel syndrome_R8 || id:ebi-a-GCST90016968 Simple mode 8 0.0907475837745743 0.207481904299845 0.675015126612158
ebi-a-GCST90016968 uDf6S8 Irritable bowel syndrome_R8 || id:ebi-a-GCST90016968 Weighted mode 8 0.121542045155587 0.18839374829535 0.53939211968776
ebi-a-GCST90016969 uDf6S8 Irritable bowel syndrome_R8 || id:ebi-a-GCST90016969 MR Egger 12 -0.451296955187083 0.340936721094376 0.215065475542724
ebi-a-GCST90016969 uDf6S8 Irritable bowel syndrome_R8 || id:ebi-a-GCST90016969 Weighted median 12 0.0333980236467406 0.113233547730296 0.76803350077056
ebi-a-GCST90016969 uDf6S8 Irritable bowel syndrome_R8 || id:ebi-a-GCST90016969 Inverse variance weighted 12 0.069218901686564 0.0873909692042087 0.428325621155065
ebi-a-GCST90016969 uDf6S8 Irritable bowel syndrome_R8 || id:ebi-a-GCST90016969 Simple mode 12 -0.0212970081523202 0.202921946007172 0.918303402537533
ebi-a-GCST90016969 uDf6S8 Irritable bowel syndrome_R8 || id:ebi-a-GCST90016969 Weighted mode 12 -0.0292948596036019 0.190129170372328 0.880338150326484
ebi-a-GCST90016970 uDf6S8 Irritable bowel syndrome_R8 || id:ebi-a-GCST90016970 MR Egger 14 -0.28740515590703 0.210331646920226 0.196859609985603
ebi-a-GCST90016970 uDf6S8 Irritable bowel syndrome_R8 || id:ebi-a-GCST90016970 Weighted median 14 -0.0558746117827947 0.10443025449895 0.592620553040245
ebi-a-GCST90016970 uDf6S8 Irritable bowel syndrome_R8 || id:ebi-a-GCST90016970 Inverse variance weighted 14 -0.0707120335641141 0.0829357223052627 0.393874228167041
ebi-a-GCST90016970 uDf6S8 Irritable bowel syndrome_R8 || id:ebi-a-GCST90016970 Simple mode 14 0.00821683600127443 0.17843589555924 0.963970888285275
ebi-a-GCST90016970 uDf6S8 Irritable bowel syndrome_R8 || id:ebi-a-GCST90016970 Weighted mode 14 -0.00896172393210626 0.171461203960887 0.959110742416473
ebi-a-GCST90016971 uDf6S8 Irritable bowel syndrome_R8 || id:ebi-a-GCST90016971 MR Egger 13 0.199077999924253 0.595903248040984 0.744603350105371
ebi-a-GCST90016971 uDf6S8 Irritable bowel syndrome_R8 || id:ebi-a-GCST90016971 Weighted median 13 0.0149247573764788 0.112540194869577 0.894496186250582
ebi-a-GCST90016971 uDf6S8 Irritable bowel syndrome_R8 || id:ebi-a-GCST90016971 Inverse variance weighted 13 0.054704672940805 0.116258334319074 0.637966336829195
ebi-a-GCST90016971 uDf6S8 Irritable bowel syndrome_R8 || id:ebi-a-GCST90016971 Simple mode 13 -0.118160306804894 0.193090075818513 0.551993262915221
ebi-a-GCST90016971 uDf6S8 Irritable bowel syndrome_R8 || id:ebi-a-GCST90016971 Weighted mode 13 -0.0725490138939533 0.178872815078236 0.692182189731974
ebi-a-GCST90016972 uDf6S8 Irritable bowel syndrome_R8 || id:ebi-a-GCST90016972 Inverse variance weighted 2 0.267352657743572 0.231464544426272 0.248070773144491
ebi-a-GCST90016973 uDf6S8 Irritable bowel syndrome_R8 || id:ebi-a-GCST90016973 MR Egger 8 -0.16982546124314 0.190356080726153 0.406668640167548
ebi-a-GCST90016973 uDf6S8 Irritable bowel syndrome_R8 || id:ebi-a-GCST90016973 Weighted median 8 -0.142886230992691 0.129324798498622 0.269218802326355
ebi-a-GCST90016973 uDf6S8 Irritable bowel syndrome_R8 || id:ebi-a-GCST90016973 Inverse variance weighted 8 -0.0589737634527203 0.0973179946249058 0.54452117605818
ebi-a-GCST90016973 uDf6S8 Irritable bowel syndrome_R8 || id:ebi-a-GCST90016973 Simple mode 8 -0.162569265224927 0.170175240388881 0.371242077480252
ebi-a-GCST90016973 uDf6S8 Irritable bowel syndrome_R8 || id:ebi-a-GCST90016973 Weighted mode 8 -0.155845056992527 0.149452076029474 0.331721016305098
ebi-a-GCST90016974 uDf6S8 Irritable bowel syndrome_R8 || id:ebi-a-GCST90016974 MR Egger 13 0.175451997104675 0.261047201638173 0.515383472717097
ebi-a-GCST90016974 uDf6S8 Irritable bowel syndrome_R8 || id:ebi-a-GCST90016974 Weighted median 13 0.158617870812468 0.101927490098373 0.119664481216707
ebi-a-GCST90016974 uDf6S8 Irritable bowel syndrome_R8 || id:ebi-a-GCST90016974 Inverse variance weighted 13 0.108268542273839 0.0736541172302307 0.141572822692587
ebi-a-GCST90016974 uDf6S8 Irritable bowel syndrome_R8 || id:ebi-a-GCST90016974 Simple mode 13 0.22293301640968 0.178174744175957 0.234703442033375
ebi-a-GCST90016974 uDf6S8 Irritable bowel syndrome_R8 || id:ebi-a-GCST90016974 Weighted mode 13 0.215935073047496 0.166610774160587 0.219332870062871
ebi-a-GCST90016975 uDf6S8 Irritable bowel syndrome_R8 || id:ebi-a-GCST90016975 MR Egger 15 0.0914761045188132 0.164912371858919 0.588519916769028
ebi-a-GCST90016975 uDf6S8 Irritable bowel syndrome_R8 || id:ebi-a-GCST90016975 Weighted median 15 0.0233419497017314 0.0507546317171279 0.645589491216821
ebi-a-GCST90016975 uDf6S8 Irritable bowel syndrome_R8 || id:ebi-a-GCST90016975 Inverse variance weighted 15 0.014384347090379 0.0372552689974772 0.699420865904538
ebi-a-GCST90016975 uDf6S8 Irritable bowel syndrome_R8 || id:ebi-a-GCST90016975 Simple mode 15 0.0348880225992693 0.0966816144548733 0.723594904022383
ebi-a-GCST90016975 uDf6S8 Irritable bowel syndrome_R8 || id:ebi-a-GCST90016975 Weighted mode 15 0.0348880225992693 0.0970191938414686 0.724513216801866
ebi-a-GCST90016976 uDf6S8 Irritable bowel syndrome_R8 || id:ebi-a-GCST90016976 MR Egger 9 0.679356887573936 0.660303568916876 0.337780214583894
ebi-a-GCST90016976 uDf6S8 Irritable bowel syndrome_R8 || id:ebi-a-GCST90016976 Weighted median 9 0.0810828796420457 0.088084828954713 0.357306821228091
ebi-a-GCST90016976 uDf6S8 Irritable bowel syndrome_R8 || id:ebi-a-GCST90016976 Inverse variance weighted 9 0.00131331742624196 0.0650201833803498 0.983884935492635
ebi-a-GCST90016976 uDf6S8 Irritable bowel syndrome_R8 || id:ebi-a-GCST90016976 Simple mode 9 0.120335087984649 0.114896032632032 0.325552204744533
ebi-a-GCST90016976 uDf6S8 Irritable bowel syndrome_R8 || id:ebi-a-GCST90016976 Weighted mode 9 0.116350899992444 0.120213628139876 0.361456091162582
ebi-a-GCST90016977 uDf6S8 Irritable bowel syndrome_R8 || id:ebi-a-GCST90016977 MR Egger 4 -1.29123981144277 0.888541135362212 0.283342171240651
ebi-a-GCST90016977 uDf6S8 Irritable bowel syndrome_R8 || id:ebi-a-GCST90016977 Weighted median 4 -0.0555047557829615 0.0860973696277679 0.519138317309827
ebi-a-GCST90016977 uDf6S8 Irritable bowel syndrome_R8 || id:ebi-a-GCST90016977 Inverse variance weighted 4 -0.0484460004930449 0.0709902723303941 0.494966121290476
ebi-a-GCST90016977 uDf6S8 Irritable bowel syndrome_R8 || id:ebi-a-GCST90016977 Simple mode 4 -0.0739581370409323 0.126186142663631 0.598985170404617
ebi-a-GCST90016977 uDf6S8 Irritable bowel syndrome_R8 || id:ebi-a-GCST90016977 Weighted mode 4 -0.0706986879937433 0.128670367229218 0.620950032515846
ebi-a-GCST90016978 uDf6S8 Irritable bowel syndrome_R8 || id:ebi-a-GCST90016978 MR Egger 8 0.0150736825672905 0.403650191241603 0.971422639871799
ebi-a-GCST90016978 uDf6S8 Irritable bowel syndrome_R8 || id:ebi-a-GCST90016978 Weighted median 8 0.0668028874171515 0.147409133014717 0.650419052099617
ebi-a-GCST90016978 uDf6S8 Irritable bowel syndrome_R8 || id:ebi-a-GCST90016978 Inverse variance weighted 8 0.00448211380931285 0.114923326758235 0.968889666661277
ebi-a-GCST90016978 uDf6S8 Irritable bowel syndrome_R8 || id:ebi-a-GCST90016978 Simple mode 8 0.116281425581853 0.219496031031192 0.612655281404181
ebi-a-GCST90016978 uDf6S8 Irritable bowel syndrome_R8 || id:ebi-a-GCST90016978 Weighted mode 8 0.086973604768237 0.204480832226491 0.683360235570334
ebi-a-GCST90016979 uDf6S8 Irritable bowel syndrome_R8 || id:ebi-a-GCST90016979 MR Egger 8 -0.0780110264219636 0.424123959770926 0.860123695409429
ebi-a-GCST90016979 uDf6S8 Irritable bowel syndrome_R8 || id:ebi-a-GCST90016979 Weighted median 8 -0.119653645714366 0.0782700792898881 0.12633193883759
ebi-a-GCST90016979 uDf6S8 Irritable bowel syndrome_R8 || id:ebi-a-GCST90016979 Inverse variance weighted 8 -0.0434737966282867 0.0782471388446958 0.57848707286869
ebi-a-GCST90016979 uDf6S8 Irritable bowel syndrome_R8 || id:ebi-a-GCST90016979 Simple mode 8 -0.125568753868 0.145073570768451 0.41541247952769
ebi-a-GCST90016979 uDf6S8 Irritable bowel syndrome_R8 || id:ebi-a-GCST90016979 Weighted mode 8 -0.136928506482605 0.117323078193628 0.281381943800918
ebi-a-GCST90016980 uDf6S8 Irritable bowel syndrome_R8 || id:ebi-a-GCST90016980 MR Egger 6 -0.0462245419106344 0.258756289533764 0.866902447546312
ebi-a-GCST90016980 uDf6S8 Irritable bowel syndrome_R8 || id:ebi-a-GCST90016980 Weighted median 6 -0.0215913083491401 0.124771479675475 0.8626146221258
ebi-a-GCST90016980 uDf6S8 Irritable bowel syndrome_R8 || id:ebi-a-GCST90016980 Inverse variance weighted 6 -0.0668125959313478 0.0954136503840875 0.48377650989313
ebi-a-GCST90016980 uDf6S8 Irritable bowel syndrome_R8 || id:ebi-a-GCST90016980 Simple mode 6 -0.0176098582992241 0.185080255918967 0.927893521465174
ebi-a-GCST90016980 uDf6S8 Irritable bowel syndrome_R8 || id:ebi-a-GCST90016980 Weighted mode 6 -0.0176098582992241 0.186678112304591 0.928508510256713
ebi-a-GCST90016981 uDf6S8 Irritable bowel syndrome_R8 || id:ebi-a-GCST90016981 MR Egger 9 -0.313015861505648 0.571538295611934 0.600935154102685
ebi-a-GCST90016981 uDf6S8 Irritable bowel syndrome_R8 || id:ebi-a-GCST90016981 Weighted median 9 0.155929941617744 0.15138470551707 0.30299854812813
ebi-a-GCST90016981 uDf6S8 Irritable bowel syndrome_R8 || id:ebi-a-GCST90016981 Inverse variance weighted 9 -0.0829192137111989 0.144969449154509 0.567337448753111
ebi-a-GCST90016981 uDf6S8 Irritable bowel syndrome_R8 || id:ebi-a-GCST90016981 Simple mode 9 0.201672052634945 0.218484869896812 0.382977336935623
ebi-a-GCST90016981 uDf6S8 Irritable bowel syndrome_R8 || id:ebi-a-GCST90016981 Weighted mode 9 0.198505342461574 0.193972006362415 0.336078730341633
ebi-a-GCST90016983 uDf6S8 Irritable bowel syndrome_R8 || id:ebi-a-GCST90016983 MR Egger 11 -0.160409893234974 0.269955475689933 0.567007027491246
ebi-a-GCST90016983 uDf6S8 Irritable bowel syndrome_R8 || id:ebi-a-GCST90016983 Weighted median 11 -0.149546644238941 0.13061133720657 0.252219740609755
ebi-a-GCST90016983 uDf6S8 Irritable bowel syndrome_R8 || id:ebi-a-GCST90016983 Inverse variance weighted 11 -0.110480028162102 0.104015778156065 0.288169037079217
ebi-a-GCST90016983 uDf6S8 Irritable bowel syndrome_R8 || id:ebi-a-GCST90016983 Simple mode 11 -0.375257240490009 0.205233678197395 0.0974241442633535
ebi-a-GCST90016983 uDf6S8 Irritable bowel syndrome_R8 || id:ebi-a-GCST90016983 Weighted mode 11 -0.22377049757683 0.191523832755315 0.269757307233757
ebi-a-GCST90016984 uDf6S8 Irritable bowel syndrome_R8 || id:ebi-a-GCST90016984 MR Egger 9 -0.0942454487634426 0.483076883048515 0.85086113223384
ebi-a-GCST90016984 uDf6S8 Irritable bowel syndrome_R8 || id:ebi-a-GCST90016984 Weighted median 9 -0.163202440560401 0.114702632173166 0.154785203706152
ebi-a-GCST90016984 uDf6S8 Irritable bowel syndrome_R8 || id:ebi-a-GCST90016984 Inverse variance weighted 9 -0.0111643975672692 0.085972240579397 0.896676801365851
ebi-a-GCST90016984 uDf6S8 Irritable bowel syndrome_R8 || id:ebi-a-GCST90016984 Simple mode 9 -0.180074177051655 0.191673256871327 0.374977538006744
ebi-a-GCST90016984 uDf6S8 Irritable bowel syndrome_R8 || id:ebi-a-GCST90016984 Weighted mode 9 -0.180074177051655 0.172448876758832 0.326908347103952
ebi-a-GCST90016985 uDf6S8 Irritable bowel syndrome_R8 || id:ebi-a-GCST90016985 MR Egger 9 -0.419960077352601 0.621058936005265 0.520621917930087
ebi-a-GCST90016985 uDf6S8 Irritable bowel syndrome_R8 || id:ebi-a-GCST90016985 Weighted median 9 0.169457266431619 0.137335599276767 0.217243234627845
ebi-a-GCST90016985 uDf6S8 Irritable bowel syndrome_R8 || id:ebi-a-GCST90016985 Inverse variance weighted 9 0.120882607489278 0.105145982640419 0.250282065768495
ebi-a-GCST90016985 uDf6S8 Irritable bowel syndrome_R8 || id:ebi-a-GCST90016985 Simple mode 9 0.222622203847227 0.201289863464753 0.300882551795757
ebi-a-GCST90016985 uDf6S8 Irritable bowel syndrome_R8 || id:ebi-a-GCST90016985 Weighted mode 9 0.222622203847227 0.214055754513694 0.328739287694425
ebi-a-GCST90016986 uDf6S8 Irritable bowel syndrome_R8 || id:ebi-a-GCST90016986 MR Egger 9 0.178672686616526 0.274489436480753 0.535867836962113
ebi-a-GCST90016986 uDf6S8 Irritable bowel syndrome_R8 || id:ebi-a-GCST90016986 Weighted median 9 0.0581714810919624 0.101655521522427 0.567158555957066
ebi-a-GCST90016986 uDf6S8 Irritable bowel syndrome_R8 || id:ebi-a-GCST90016986 Inverse variance weighted 9 -0.0186560782659901 0.0761218905319867 0.806393213613019
ebi-a-GCST90016986 uDf6S8 Irritable bowel syndrome_R8 || id:ebi-a-GCST90016986 Simple mode 9 0.10689233109655 0.177932052788572 0.56463560094997
ebi-a-GCST90016986 uDf6S8 Irritable bowel syndrome_R8 || id:ebi-a-GCST90016986 Weighted mode 9 0.117408418489169 0.169205880313279 0.507402042345991
ebi-a-GCST90016987 uDf6S8 Irritable bowel syndrome_R8 || id:ebi-a-GCST90016987 MR Egger 9 0.364999747861701 0.331313551650385 0.307035422826886
ebi-a-GCST90016987 uDf6S8 Irritable bowel syndrome_R8 || id:ebi-a-GCST90016987 Weighted median 9 0.055179347460399 0.113458295224509 0.626725872428641
ebi-a-GCST90016987 uDf6S8 Irritable bowel syndrome_R8 || id:ebi-a-GCST90016987 Inverse variance weighted 9 0.0326188121132942 0.112639103500201 0.772132267565943
ebi-a-GCST90016987 uDf6S8 Irritable bowel syndrome_R8 || id:ebi-a-GCST90016987 Simple mode 9 0.0741251721650358 0.201035429036793 0.72190557922603
ebi-a-GCST90016987 uDf6S8 Irritable bowel syndrome_R8 || id:ebi-a-GCST90016987 Weighted mode 9 0.0650506022330051 0.150355167415555 0.676698370143247
ebi-a-GCST90016988 uDf6S8 Irritable bowel syndrome_R8 || id:ebi-a-GCST90016988 MR Egger 11 0.154758788961391 0.327268698604713 0.647556680104697
ebi-a-GCST90016988 uDf6S8 Irritable bowel syndrome_R8 || id:ebi-a-GCST90016988 Weighted median 11 -0.149452700727057 0.106129029726163 0.159066832601103
ebi-a-GCST90016988 uDf6S8 Irritable bowel syndrome_R8 || id:ebi-a-GCST90016988 Inverse variance weighted 11 -0.129719249418675 0.0800169695633816 0.104986171767293
ebi-a-GCST90016988 uDf6S8 Irritable bowel syndrome_R8 || id:ebi-a-GCST90016988 Simple mode 11 -0.202995658639902 0.178373188504202 0.281635228894877
ebi-a-GCST90016988 uDf6S8 Irritable bowel syndrome_R8 || id:ebi-a-GCST90016988 Weighted mode 11 -0.18689588840923 0.170453390479427 0.298578102500638
ebi-a-GCST90016989 uDf6S8 Irritable bowel syndrome_R8 || id:ebi-a-GCST90016989 MR Egger 10 -0.189039446801418 0.356001840917371 0.609835334907642
ebi-a-GCST90016989 uDf6S8 Irritable bowel syndrome_R8 || id:ebi-a-GCST90016989 Weighted median 10 0.0552778260123017 0.139964195977999 0.692885236550756
ebi-a-GCST90016989 uDf6S8 Irritable bowel syndrome_R8 || id:ebi-a-GCST90016989 Inverse variance weighted 10 0.00861997426827684 0.123294416813511 0.944262313932797
ebi-a-GCST90016989 uDf6S8 Irritable bowel syndrome_R8 || id:ebi-a-GCST90016989 Simple mode 10 -0.0573916108365828 0.236680033876945 0.813839163630557
ebi-a-GCST90016989 uDf6S8 Irritable bowel syndrome_R8 || id:ebi-a-GCST90016989 Weighted mode 10 0.0483094940405067 0.205511009427948 0.819415572530642
ebi-a-GCST90016990 uDf6S8 Irritable bowel syndrome_R8 || id:ebi-a-GCST90016990 MR Egger 9 -0.0188416942842778 0.303870039069178 0.952291555981495
ebi-a-GCST90016990 uDf6S8 Irritable bowel syndrome_R8 || id:ebi-a-GCST90016990 Weighted median 9 0.0037781612851612 0.0818513778185189 0.963183681195982
ebi-a-GCST90016990 uDf6S8 Irritable bowel syndrome_R8 || id:ebi-a-GCST90016990 Inverse variance weighted 9 -0.0385528669856519 0.0632317641159773 0.542055730392782
ebi-a-GCST90016990 uDf6S8 Irritable bowel syndrome_R8 || id:ebi-a-GCST90016990 Simple mode 9 0.0176436911832901 0.131977517580662 0.89695186398564
ebi-a-GCST90016990 uDf6S8 Irritable bowel syndrome_R8 || id:ebi-a-GCST90016990 Weighted mode 9 0.0113906908110599 0.1272905996263 0.930895660862583
ebi-a-GCST90016991 uDf6S8 Irritable bowel syndrome_R8 || id:ebi-a-GCST90016991 MR Egger 11 -0.36073059125599 0.405644043186263 0.396999670424484
ebi-a-GCST90016991 uDf6S8 Irritable bowel syndrome_R8 || id:ebi-a-GCST90016991 Weighted median 11 0.0229405945786893 0.0764234115971376 0.764041707229785
ebi-a-GCST90016991 uDf6S8 Irritable bowel syndrome_R8 || id:ebi-a-GCST90016991 Inverse variance weighted 11 -0.0143310711901482 0.0547673986133679 0.79357466070456
ebi-a-GCST90016991 uDf6S8 Irritable bowel syndrome_R8 || id:ebi-a-GCST90016991 Simple mode 11 0.0581584176418694 0.123673333652253 0.648258806271149
ebi-a-GCST90016991 uDf6S8 Irritable bowel syndrome_R8 || id:ebi-a-GCST90016991 Weighted mode 11 0.0521431497757513 0.120483511280165 0.674357880429365
ebi-a-GCST90016992 uDf6S8 Irritable bowel syndrome_R8 || id:ebi-a-GCST90016992 MR Egger 6 0.249989732143258 0.347066038091141 0.511188781854571
ebi-a-GCST90016992 uDf6S8 Irritable bowel syndrome_R8 || id:ebi-a-GCST90016992 Weighted median 6 0.0966948063134993 0.122562508738305 0.43014545085203
ebi-a-GCST90016992 uDf6S8 Irritable bowel syndrome_R8 || id:ebi-a-GCST90016992 Inverse variance weighted 6 0.0515396597716069 0.123479392577493 0.676389637604999
ebi-a-GCST90016992 uDf6S8 Irritable bowel syndrome_R8 || id:ebi-a-GCST90016992 Simple mode 6 0.142710385816113 0.181616539606509 0.467582367796784
ebi-a-GCST90016992 uDf6S8 Irritable bowel syndrome_R8 || id:ebi-a-GCST90016992 Weighted mode 6 0.103176891908874 0.145570904973821 0.510133621166576
ebi-a-GCST90016993 uDf6S8 Irritable bowel syndrome_R8 || id:ebi-a-GCST90016993 MR Egger 15 -0.229911883746345 0.238095453381759 0.351850713956159
ebi-a-GCST90016993 uDf6S8 Irritable bowel syndrome_R8 || id:ebi-a-GCST90016993 Weighted median 15 0.00916834644138138 0.0808727327733318 0.909739137086436
ebi-a-GCST90016993 uDf6S8 Irritable bowel syndrome_R8 || id:ebi-a-GCST90016993 Inverse variance weighted 15 -0.00724666692859196 0.0607038372239158 0.904976356677068
ebi-a-GCST90016993 uDf6S8 Irritable bowel syndrome_R8 || id:ebi-a-GCST90016993 Simple mode 15 -0.0376048132173902 0.142124305745982 0.795180076242535
ebi-a-GCST90016993 uDf6S8 Irritable bowel syndrome_R8 || id:ebi-a-GCST90016993 Weighted mode 15 -0.0354012143913671 0.144366465351548 0.809845881665345
ebi-a-GCST90016994 uDf6S8 Irritable bowel syndrome_R8 || id:ebi-a-GCST90016994 Wald ratio 1 0.000669216759888487 0.238608568548981 0.997762205172419
ebi-a-GCST90016995 uDf6S8 Irritable bowel syndrome_R8 || id:ebi-a-GCST90016995 MR Egger 10 -0.0651508269929773 0.275472356833636 0.81898329554696
ebi-a-GCST90016995 uDf6S8 Irritable bowel syndrome_R8 || id:ebi-a-GCST90016995 Weighted median 10 -0.0201646284100609 0.12134302490496 0.868016306541888
ebi-a-GCST90016995 uDf6S8 Irritable bowel syndrome_R8 || id:ebi-a-GCST90016995 Inverse variance weighted 10 -0.0314128032263067 0.0884121273126911 0.72236507242749
ebi-a-GCST90016995 uDf6S8 Irritable bowel syndrome_R8 || id:ebi-a-GCST90016995 Simple mode 10 -0.0177228508396059 0.196986744048153 0.930281676460967
ebi-a-GCST90016995 uDf6S8 Irritable bowel syndrome_R8 || id:ebi-a-GCST90016995 Weighted mode 10 0.00851043649233918 0.182307944525623 0.963786390419483
ebi-a-GCST90016996 uDf6S8 Irritable bowel syndrome_R8 || id:ebi-a-GCST90016996 MR Egger 10 -0.0792204621690541 0.216880852697662 0.724377202507249
ebi-a-GCST90016996 uDf6S8 Irritable bowel syndrome_R8 || id:ebi-a-GCST90016996 Weighted median 10 -0.028058944520602 0.0691642881859729 0.684973743486232
ebi-a-GCST90016996 uDf6S8 Irritable bowel syndrome_R8 || id:ebi-a-GCST90016996 Inverse variance weighted 10 -0.0368586869715783 0.0510075262706252 0.469917855161265
ebi-a-GCST90016996 uDf6S8 Irritable bowel syndrome_R8 || id:ebi-a-GCST90016996 Simple mode 10 -0.155672270494077 0.128292819056456 0.255854972999617
ebi-a-GCST90016996 uDf6S8 Irritable bowel syndrome_R8 || id:ebi-a-GCST90016996 Weighted mode 10 -0.0137100021713455 0.114061214378896 0.906966326321492
ebi-a-GCST90016997 uDf6S8 Irritable bowel syndrome_R8 || id:ebi-a-GCST90016997 MR Egger 12 -0.470026678113356 0.39431378509054 0.260776237002296
ebi-a-GCST90016997 uDf6S8 Irritable bowel syndrome_R8 || id:ebi-a-GCST90016997 Weighted median 12 -0.131759644874773 0.13258107629742 0.320318148066288
ebi-a-GCST90016997 uDf6S8 Irritable bowel syndrome_R8 || id:ebi-a-GCST90016997 Inverse variance weighted 12 -0.164569761581563 0.104290910439818 0.114568462685397
ebi-a-GCST90016997 uDf6S8 Irritable bowel syndrome_R8 || id:ebi-a-GCST90016997 Simple mode 12 -0.115755947401454 0.220086587692169 0.609358456802427
ebi-a-GCST90016997 uDf6S8 Irritable bowel syndrome_R8 || id:ebi-a-GCST90016997 Weighted mode 12 -0.101250563839966 0.235458535103219 0.675488251368089
ebi-a-GCST90016998 uDf6S8 Irritable bowel syndrome_R8 || id:ebi-a-GCST90016998 MR Egger 6 0.0186286565724328 0.44008668844324 0.968264708200985
ebi-a-GCST90016998 uDf6S8 Irritable bowel syndrome_R8 || id:ebi-a-GCST90016998 Weighted median 6 -0.0986574230180185 0.138903115803984 0.477542491267873
ebi-a-GCST90016998 uDf6S8 Irritable bowel syndrome_R8 || id:ebi-a-GCST90016998 Inverse variance weighted 6 -0.0790102561580151 0.117674840772964 0.50194751658182
ebi-a-GCST90016998 uDf6S8 Irritable bowel syndrome_R8 || id:ebi-a-GCST90016998 Simple mode 6 -0.12409666298275 0.190328507365651 0.543172554410813
ebi-a-GCST90016998 uDf6S8 Irritable bowel syndrome_R8 || id:ebi-a-GCST90016998 Weighted mode 6 -0.112575917233068 0.187142290234064 0.573703993152997
ebi-a-GCST90016999 uDf6S8 Irritable bowel syndrome_R8 || id:ebi-a-GCST90016999 MR Egger 9 -0.246428614742126 0.272793832944942 0.396360918678675
ebi-a-GCST90016999 uDf6S8 Irritable bowel syndrome_R8 || id:ebi-a-GCST90016999 Weighted median 9 -0.0256997013637888 0.0714039550244025 0.718907066203213
ebi-a-GCST90016999 uDf6S8 Irritable bowel syndrome_R8 || id:ebi-a-GCST90016999 Inverse variance weighted 9 0.0138135217032862 0.0526878127474325 0.793185145342749
ebi-a-GCST90016999 uDf6S8 Irritable bowel syndrome_R8 || id:ebi-a-GCST90016999 Simple mode 9 -0.101100899389236 0.121896977985664 0.430930611012591
ebi-a-GCST90016999 uDf6S8 Irritable bowel syndrome_R8 || id:ebi-a-GCST90016999 Weighted mode 9 -0.0944385473145813 0.124679177210695 0.470498409199915
ebi-a-GCST90017000 uDf6S8 Irritable bowel syndrome_R8 || id:ebi-a-GCST90017000 MR Egger 14 0.135929101530529 0.197502478212171 0.504389322895888
ebi-a-GCST90017000 uDf6S8 Irritable bowel syndrome_R8 || id:ebi-a-GCST90017000 Weighted median 14 0.0834591466416838 0.102019576514558 0.413317264462319
ebi-a-GCST90017000 uDf6S8 Irritable bowel syndrome_R8 || id:ebi-a-GCST90017000 Inverse variance weighted 14 0.0580761670845451 0.0919467262382231 0.527629699413357
ebi-a-GCST90017000 uDf6S8 Irritable bowel syndrome_R8 || id:ebi-a-GCST90017000 Simple mode 14 0.142324232411495 0.158790120024749 0.386387183242348
ebi-a-GCST90017000 uDf6S8 Irritable bowel syndrome_R8 || id:ebi-a-GCST90017000 Weighted mode 14 0.113992294451194 0.124243540835252 0.375593657123752
ebi-a-GCST90017001 uDf6S8 Irritable bowel syndrome_R8 || id:ebi-a-GCST90017001 MR Egger 11 0.12385348953742 0.191251880938739 0.533416842143776
ebi-a-GCST90017001 uDf6S8 Irritable bowel syndrome_R8 || id:ebi-a-GCST90017001 Weighted median 11 -0.0138664499149027 0.0542512960482129 0.798262299907267
ebi-a-GCST90017001 uDf6S8 Irritable bowel syndrome_R8 || id:ebi-a-GCST90017001 Inverse variance weighted 11 -0.0262128728776882 0.0429426757079685 0.541586633679122
ebi-a-GCST90017001 uDf6S8 Irritable bowel syndrome_R8 || id:ebi-a-GCST90017001 Simple mode 11 0.00100832482618135 0.0916284588899395 0.991436308371975
ebi-a-GCST90017001 uDf6S8 Irritable bowel syndrome_R8 || id:ebi-a-GCST90017001 Weighted mode 11 -0.0026127718150693 0.0889999826257838 0.977157505384863
ebi-a-GCST90017002 uDf6S8 Irritable bowel syndrome_R8 || id:ebi-a-GCST90017002 MR Egger 5 0.453879754204195 0.423430709881577 0.362323184880154
ebi-a-GCST90017002 uDf6S8 Irritable bowel syndrome_R8 || id:ebi-a-GCST90017002 Weighted median 5 0.120335455573919 0.114827214582526 0.294652511220116
ebi-a-GCST90017002 uDf6S8 Irritable bowel syndrome_R8 || id:ebi-a-GCST90017002 Inverse variance weighted 5 -0.0189296584142398 0.119019535409824 0.87363212003709
ebi-a-GCST90017002 uDf6S8 Irritable bowel syndrome_R8 || id:ebi-a-GCST90017002 Simple mode 5 0.151106555688433 0.138198630203283 0.335648666237672
ebi-a-GCST90017002 uDf6S8 Irritable bowel syndrome_R8 || id:ebi-a-GCST90017002 Weighted mode 5 0.155017897039632 0.136174312210457 0.318516231451862
ebi-a-GCST90017003 uDf6S8 Irritable bowel syndrome_R8 || id:ebi-a-GCST90017003 MR Egger 9 0.210613191164153 0.389002998038021 0.605014707949394
ebi-a-GCST90017003 uDf6S8 Irritable bowel syndrome_R8 || id:ebi-a-GCST90017003 Weighted median 9 -0.0943925609228216 0.137612947939707 0.49275857309657
ebi-a-GCST90017003 uDf6S8 Irritable bowel syndrome_R8 || id:ebi-a-GCST90017003 Inverse variance weighted 9 -0.182446061063862 0.103190326643831 0.0770518906691887
ebi-a-GCST90017003 uDf6S8 Irritable bowel syndrome_R8 || id:ebi-a-GCST90017003 Simple mode 9 0.021589195165574 0.259957414482748 0.935853035156897
ebi-a-GCST90017003 uDf6S8 Irritable bowel syndrome_R8 || id:ebi-a-GCST90017003 Weighted mode 9 0.0581415616723711 0.243054885272676 0.816955961589087
ebi-a-GCST90017004 uDf6S8 Irritable bowel syndrome_R8 || id:ebi-a-GCST90017004 MR Egger 18 0.0562529942617062 0.15968533225764 0.729230029121326
ebi-a-GCST90017004 uDf6S8 Irritable bowel syndrome_R8 || id:ebi-a-GCST90017004 Weighted median 18 0.0892122395925272 0.0660267829235445 0.176646650960883
ebi-a-GCST90017004 uDf6S8 Irritable bowel syndrome_R8 || id:ebi-a-GCST90017004 Inverse variance weighted 18 0.0855948591996259 0.0477095579278204 0.0728000812980353
ebi-a-GCST90017004 uDf6S8 Irritable bowel syndrome_R8 || id:ebi-a-GCST90017004 Simple mode 18 0.117010169897385 0.108291631535874 0.295006330270499
ebi-a-GCST90017004 uDf6S8 Irritable bowel syndrome_R8 || id:ebi-a-GCST90017004 Weighted mode 18 0.0939635978711162 0.105566924537852 0.385843233251274
ebi-a-GCST90017005 uDf6S8 Irritable bowel syndrome_R8 || id:ebi-a-GCST90017005 MR Egger 15 -0.149628794927689 0.368481578949231 0.691297064292607
ebi-a-GCST90017005 uDf6S8 Irritable bowel syndrome_R8 || id:ebi-a-GCST90017005 Weighted median 15 -0.0971583657544048 0.108744488677416 0.371613271703372
ebi-a-GCST90017005 uDf6S8 Irritable bowel syndrome_R8 || id:ebi-a-GCST90017005 Inverse variance weighted 15 -0.111161886538406 0.0797251379244491 0.16322276503466
ebi-a-GCST90017005 uDf6S8 Irritable bowel syndrome_R8 || id:ebi-a-GCST90017005 Simple mode 15 -0.0915526108843128 0.189681637725052 0.636793754363608
ebi-a-GCST90017005 uDf6S8 Irritable bowel syndrome_R8 || id:ebi-a-GCST90017005 Weighted mode 15 -0.0718427942113871 0.172248957240233 0.682939826755636
ebi-a-GCST90017006 uDf6S8 Irritable bowel syndrome_R8 || id:ebi-a-GCST90017006 MR Egger 9 0.164567410946594 0.252031169342106 0.534628748408376
ebi-a-GCST90017006 uDf6S8 Irritable bowel syndrome_R8 || id:ebi-a-GCST90017006 Weighted median 9 -0.0815882323366753 0.115293476845064 0.47915830595415
ebi-a-GCST90017006 uDf6S8 Irritable bowel syndrome_R8 || id:ebi-a-GCST90017006 Inverse variance weighted 9 -0.0783612109059358 0.0843112452883553 0.352667452742844
ebi-a-GCST90017006 uDf6S8 Irritable bowel syndrome_R8 || id:ebi-a-GCST90017006 Simple mode 9 -0.118332717114902 0.161402961136712 0.48439285349378
ebi-a-GCST90017006 uDf6S8 Irritable bowel syndrome_R8 || id:ebi-a-GCST90017006 Weighted mode 9 -0.0965280694301345 0.151886541397191 0.542831791368336
ebi-a-GCST90017007 uDf6S8 Irritable bowel syndrome_R8 || id:ebi-a-GCST90017007 MR Egger 10 0.00840809690137507 0.159079797651055 0.959143765840836
ebi-a-GCST90017007 uDf6S8 Irritable bowel syndrome_R8 || id:ebi-a-GCST90017007 Weighted median 10 0.0820491357322753 0.1073381664479 0.444629789573826
ebi-a-GCST90017007 uDf6S8 Irritable bowel syndrome_R8 || id:ebi-a-GCST90017007 Inverse variance weighted 10 0.0204597674824475 0.0780888518588978 0.793316621296339
ebi-a-GCST90017007 uDf6S8 Irritable bowel syndrome_R8 || id:ebi-a-GCST90017007 Simple mode 10 -0.0323153766892299 0.181977174522677 0.862985822312585
ebi-a-GCST90017007 uDf6S8 Irritable bowel syndrome_R8 || id:ebi-a-GCST90017007 Weighted mode 10 0.0408897577307537 0.132413692469843 0.764499990486479
ebi-a-GCST90017008 uDf6S8 Irritable bowel syndrome_R8 || id:ebi-a-GCST90017008 MR Egger 12 -0.289970590350131 0.397578762769242 0.482526087158465
ebi-a-GCST90017008 uDf6S8 Irritable bowel syndrome_R8 || id:ebi-a-GCST90017008 Weighted median 12 -0.148908371205444 0.112959144134202 0.187420033575797
ebi-a-GCST90017008 uDf6S8 Irritable bowel syndrome_R8 || id:ebi-a-GCST90017008 Inverse variance weighted 12 -0.0390485282784333 0.0859806779665755 0.649717491261852
ebi-a-GCST90017008 uDf6S8 Irritable bowel syndrome_R8 || id:ebi-a-GCST90017008 Simple mode 12 -0.192670917980104 0.198377037032708 0.352303122075415
ebi-a-GCST90017008 uDf6S8 Irritable bowel syndrome_R8 || id:ebi-a-GCST90017008 Weighted mode 12 -0.200607163796069 0.19048996948506 0.314873534916294
ebi-a-GCST90017009 uDf6S8 Irritable bowel syndrome_R8 || id:ebi-a-GCST90017009 MR Egger 8 0.0894216197826644 0.364776300210864 0.81451641102227
ebi-a-GCST90017009 uDf6S8 Irritable bowel syndrome_R8 || id:ebi-a-GCST90017009 Weighted median 8 0.125996816946008 0.12559708585074 0.315772744395889
ebi-a-GCST90017009 uDf6S8 Irritable bowel syndrome_R8 || id:ebi-a-GCST90017009 Inverse variance weighted 8 0.0703495660113137 0.109590067357856 0.520916181059348
ebi-a-GCST90017009 uDf6S8 Irritable bowel syndrome_R8 || id:ebi-a-GCST90017009 Simple mode 8 0.21454265393914 0.210671519833751 0.342399091366173
ebi-a-GCST90017009 uDf6S8 Irritable bowel syndrome_R8 || id:ebi-a-GCST90017009 Weighted mode 8 0.19824876869451 0.180163829878511 0.30756144872735
ebi-a-GCST90017010 uDf6S8 Irritable bowel syndrome_R8 || id:ebi-a-GCST90017010 MR Egger 5 0.0778298530561528 0.437122136559698 0.870027483524599
ebi-a-GCST90017010 uDf6S8 Irritable bowel syndrome_R8 || id:ebi-a-GCST90017010 Weighted median 5 -0.132925906259551 0.134288872686591 0.322247202654505
ebi-a-GCST90017010 uDf6S8 Irritable bowel syndrome_R8 || id:ebi-a-GCST90017010 Inverse variance weighted 5 -0.0557714137808113 0.109490738705203 0.610492156652319
ebi-a-GCST90017010 uDf6S8 Irritable bowel syndrome_R8 || id:ebi-a-GCST90017010 Simple mode 5 -0.149609669167795 0.169661490742185 0.427681097708466
ebi-a-GCST90017010 uDf6S8 Irritable bowel syndrome_R8 || id:ebi-a-GCST90017010 Weighted mode 5 -0.149609669167795 0.18214968005901 0.45757718694795
ebi-a-GCST90017011 uDf6S8 Irritable bowel syndrome_R8 || id:ebi-a-GCST90017011 MR Egger 19 0.128130683181764 0.276466193567301 0.64891404367129
ebi-a-GCST90017011 uDf6S8 Irritable bowel syndrome_R8 || id:ebi-a-GCST90017011 Weighted median 19 -0.0109173502404822 0.101214011214098 0.914103557568859
ebi-a-GCST90017011 uDf6S8 Irritable bowel syndrome_R8 || id:ebi-a-GCST90017011 Inverse variance weighted 19 0.0182306475655993 0.073895496084984 0.805133821856154
ebi-a-GCST90017011 uDf6S8 Irritable bowel syndrome_R8 || id:ebi-a-GCST90017011 Simple mode 19 -0.105816694861246 0.163374308868018 0.525358197467362
ebi-a-GCST90017011 uDf6S8 Irritable bowel syndrome_R8 || id:ebi-a-GCST90017011 Weighted mode 19 -0.102236042318372 0.169965290074846 0.55500034917598
ebi-a-GCST90017012 uDf6S8 Irritable bowel syndrome_R8 || id:ebi-a-GCST90017012 MR Egger 11 -0.0546461505826046 0.189206365057269 0.779262812291691
ebi-a-GCST90017012 uDf6S8 Irritable bowel syndrome_R8 || id:ebi-a-GCST90017012 Weighted median 11 0.0604093616170661 0.0619240188809058 0.329292436322698
ebi-a-GCST90017012 uDf6S8 Irritable bowel syndrome_R8 || id:ebi-a-GCST90017012 Inverse variance weighted 11 0.0246554877403947 0.0446514329712418 0.580827191480277
ebi-a-GCST90017012 uDf6S8 Irritable bowel syndrome_R8 || id:ebi-a-GCST90017012 Simple mode 11 0.0913240923791122 0.107680755345886 0.41622024493069
ebi-a-GCST90017012 uDf6S8 Irritable bowel syndrome_R8 || id:ebi-a-GCST90017012 Weighted mode 11 0.102714658253017 0.107494240004589 0.361835090964759
ebi-a-GCST90017013 uDf6S8 Irritable bowel syndrome_R8 || id:ebi-a-GCST90017013 MR Egger 9 0.240776449290002 0.147976075603033 0.147734834477019
ebi-a-GCST90017013 uDf6S8 Irritable bowel syndrome_R8 || id:ebi-a-GCST90017013 Weighted median 9 -0.029374275697603 0.0929975919881474 0.752108314647313
ebi-a-GCST90017013 uDf6S8 Irritable bowel syndrome_R8 || id:ebi-a-GCST90017013 Inverse variance weighted 9 0.017581283161127 0.0662553711300942 0.790734962153306
ebi-a-GCST90017013 uDf6S8 Irritable bowel syndrome_R8 || id:ebi-a-GCST90017013 Simple mode 9 -0.124544763663707 0.155992988952966 0.447689271285465
ebi-a-GCST90017013 uDf6S8 Irritable bowel syndrome_R8 || id:ebi-a-GCST90017013 Weighted mode 9 -0.124544763663707 0.145255296531035 0.416158341837217
ebi-a-GCST90017014 uDf6S8 Irritable bowel syndrome_R8 || id:ebi-a-GCST90017014 MR Egger 11 -0.217467581517466 0.171718997090457 0.237157882906996
ebi-a-GCST90017014 uDf6S8 Irritable bowel syndrome_R8 || id:ebi-a-GCST90017014 Weighted median 11 0.0763984010825214 0.0808015945465902 0.34440055459069
ebi-a-GCST90017014 uDf6S8 Irritable bowel syndrome_R8 || id:ebi-a-GCST90017014 Inverse variance weighted 11 0.0512398669690287 0.0651751912079356 0.431758130472748
ebi-a-GCST90017014 uDf6S8 Irritable bowel syndrome_R8 || id:ebi-a-GCST90017014 Simple mode 11 0.13003356536375 0.119194342715924 0.300888148912374
ebi-a-GCST90017014 uDf6S8 Irritable bowel syndrome_R8 || id:ebi-a-GCST90017014 Weighted mode 11 0.0956223868686594 0.116572937454969 0.431175054894833
ebi-a-GCST90017015 uDf6S8 Irritable bowel syndrome_R8 || id:ebi-a-GCST90017015 MR Egger 14 0.037433337999024 0.224228524667429 0.870195170437514
ebi-a-GCST90017015 uDf6S8 Irritable bowel syndrome_R8 || id:ebi-a-GCST90017015 Weighted median 14 -0.0423636099811158 0.0902363293495194 0.638730869037313
ebi-a-GCST90017015 uDf6S8 Irritable bowel syndrome_R8 || id:ebi-a-GCST90017015 Inverse variance weighted 14 -0.0779412578141232 0.0740147900609796 0.292318181262915
ebi-a-GCST90017015 uDf6S8 Irritable bowel syndrome_R8 || id:ebi-a-GCST90017015 Simple mode 14 0.0141980970963165 0.156483700554638 0.92908856943139
ebi-a-GCST90017015 uDf6S8 Irritable bowel syndrome_R8 || id:ebi-a-GCST90017015 Weighted mode 14 0.0250678082301168 0.151434431595567 0.871068897694109
ebi-a-GCST90017016 uDf6S8 Irritable bowel syndrome_R8 || id:ebi-a-GCST90017016 MR Egger 9 0.485203509887739 0.184360226942012 0.0338228859501458
ebi-a-GCST90017016 uDf6S8 Irritable bowel syndrome_R8 || id:ebi-a-GCST90017016 Weighted median 9 0.0409590666287889 0.0666748380665405 0.539010031391309
ebi-a-GCST90017016 uDf6S8 Irritable bowel syndrome_R8 || id:ebi-a-GCST90017016 Inverse variance weighted 9 0.0189176769072499 0.05808380649603 0.744654195468624
ebi-a-GCST90017016 uDf6S8 Irritable bowel syndrome_R8 || id:ebi-a-GCST90017016 Simple mode 9 -0.0620806323126389 0.121863414172292 0.624203784362861
ebi-a-GCST90017016 uDf6S8 Irritable bowel syndrome_R8 || id:ebi-a-GCST90017016 Weighted mode 9 0.0754139692935196 0.098754610487624 0.466997352436008
ebi-a-GCST90017017 uDf6S8 Irritable bowel syndrome_R8 || id:ebi-a-GCST90017017 MR Egger 5 0.542642956229463 0.430758184154087 0.296850603061511
ebi-a-GCST90017017 uDf6S8 Irritable bowel syndrome_R8 || id:ebi-a-GCST90017017 Weighted median 5 0.01349201011088 0.0847343646974823 0.873489926091344
ebi-a-GCST90017017 uDf6S8 Irritable bowel syndrome_R8 || id:ebi-a-GCST90017017 Inverse variance weighted 5 0.00631092836696494 0.0709790292055958 0.929151388506753
ebi-a-GCST90017017 uDf6S8 Irritable bowel syndrome_R8 || id:ebi-a-GCST90017017 Simple mode 5 -0.101869238176929 0.122474624460337 0.452317217380614
ebi-a-GCST90017017 uDf6S8 Irritable bowel syndrome_R8 || id:ebi-a-GCST90017017 Weighted mode 5 0.0921148615697108 0.128650893540841 0.513563692812845
ebi-a-GCST90017018 uDf6S8 Irritable bowel syndrome_R8 || id:ebi-a-GCST90017018 MR Egger 15 -0.135435501958852 0.331457891151601 0.6894801361368
ebi-a-GCST90017018 uDf6S8 Irritable bowel syndrome_R8 || id:ebi-a-GCST90017018 Weighted median 15 0.130834878165097 0.0998913900716788 0.190273207008656
ebi-a-GCST90017018 uDf6S8 Irritable bowel syndrome_R8 || id:ebi-a-GCST90017018 Inverse variance weighted 15 0.0449160013307843 0.0994511202622713 0.651529092426447
ebi-a-GCST90017018 uDf6S8 Irritable bowel syndrome_R8 || id:ebi-a-GCST90017018 Simple mode 15 0.182199386624312 0.182860387715988 0.335973685191507
ebi-a-GCST90017018 uDf6S8 Irritable bowel syndrome_R8 || id:ebi-a-GCST90017018 Weighted mode 15 0.182199386624312 0.153839034696146 0.255992153882811
ebi-a-GCST90017019 uDf6S8 Irritable bowel syndrome_R8 || id:ebi-a-GCST90017019 MR Egger 16 0.110392139608983 0.181880858559676 0.553602247327337
ebi-a-GCST90017019 uDf6S8 Irritable bowel syndrome_R8 || id:ebi-a-GCST90017019 Weighted median 16 0.0910338127236352 0.0909204599312561 0.316707542156323
ebi-a-GCST90017019 uDf6S8 Irritable bowel syndrome_R8 || id:ebi-a-GCST90017019 Inverse variance weighted 16 0.0357444250259064 0.0642092564958103 0.577741655381212
ebi-a-GCST90017019 uDf6S8 Irritable bowel syndrome_R8 || id:ebi-a-GCST90017019 Simple mode 16 0.118588281255611 0.162133484944658 0.475792473304291
ebi-a-GCST90017019 uDf6S8 Irritable bowel syndrome_R8 || id:ebi-a-GCST90017019 Weighted mode 16 0.112813828797163 0.167412563890976 0.510647253690743
ebi-a-GCST90017020 uDf6S8 Irritable bowel syndrome_R8 || id:ebi-a-GCST90017020 MR Egger 13 0.0146764322652797 0.332228538971359 0.965556070671235
ebi-a-GCST90017020 uDf6S8 Irritable bowel syndrome_R8 || id:ebi-a-GCST90017020 Weighted median 13 0.00548596944327157 0.119138893745611 0.963272917459918
ebi-a-GCST90017020 uDf6S8 Irritable bowel syndrome_R8 || id:ebi-a-GCST90017020 Inverse variance weighted 13 0.0287860861167893 0.0934928844764837 0.758161461781321
ebi-a-GCST90017020 uDf6S8 Irritable bowel syndrome_R8 || id:ebi-a-GCST90017020 Simple mode 13 0.0433263186073907 0.190238209016614 0.823676649074455
ebi-a-GCST90017020 uDf6S8 Irritable bowel syndrome_R8 || id:ebi-a-GCST90017020 Weighted mode 13 -0.00731518280228749 0.175805720872382 0.967494332638783
ebi-a-GCST90017021 uDf6S8 Irritable bowel syndrome_R8 || id:ebi-a-GCST90017021 MR Egger 13 0.0712234436504828 0.202813521591457 0.732089404002572
ebi-a-GCST90017021 uDf6S8 Irritable bowel syndrome_R8 || id:ebi-a-GCST90017021 Weighted median 13 -0.0991430313528828 0.0958075514118283 0.300755608719331
ebi-a-GCST90017021 uDf6S8 Irritable bowel syndrome_R8 || id:ebi-a-GCST90017021 Inverse variance weighted 13 -0.083724509326185 0.0741618065059919 0.258921555477665
ebi-a-GCST90017021 uDf6S8 Irritable bowel syndrome_R8 || id:ebi-a-GCST90017021 Simple mode 13 -0.149473698613943 0.149417310875239 0.336873810884186
ebi-a-GCST90017021 uDf6S8 Irritable bowel syndrome_R8 || id:ebi-a-GCST90017021 Weighted mode 13 0.0240218259137266 0.140703106310856 0.867283219323801
ebi-a-GCST90017022 uDf6S8 Irritable bowel syndrome_R8 || id:ebi-a-GCST90017022 MR Egger 9 0.185474663748449 0.258948998530884 0.497024700510854
ebi-a-GCST90017022 uDf6S8 Irritable bowel syndrome_R8 || id:ebi-a-GCST90017022 Weighted median 9 -0.0197581317932868 0.0839104858171109 0.813846460788708
ebi-a-GCST90017022 uDf6S8 Irritable bowel syndrome_R8 || id:ebi-a-GCST90017022 Inverse variance weighted 9 -0.0644909512185909 0.0636910595815455 0.311270884742744
ebi-a-GCST90017022 uDf6S8 Irritable bowel syndrome_R8 || id:ebi-a-GCST90017022 Simple mode 9 0.00419172810181268 0.123256325720486 0.973703812450079
ebi-a-GCST90017022 uDf6S8 Irritable bowel syndrome_R8 || id:ebi-a-GCST90017022 Weighted mode 9 0.0127695742688504 0.120852345735073 0.918451419120937
ebi-a-GCST90017023 uDf6S8 Irritable bowel syndrome_R8 || id:ebi-a-GCST90017023 MR Egger 3 -3.10477353629151 5.44871271874054 0.670274882327231
ebi-a-GCST90017023 uDf6S8 Irritable bowel syndrome_R8 || id:ebi-a-GCST90017023 Weighted median 3 -0.230408307717493 0.253588630051206 0.363566140753821
ebi-a-GCST90017023 uDf6S8 Irritable bowel syndrome_R8 || id:ebi-a-GCST90017023 Inverse variance weighted 3 -0.0666818990582927 0.261774181284141 0.798931166148668
ebi-a-GCST90017023 uDf6S8 Irritable bowel syndrome_R8 || id:ebi-a-GCST90017023 Simple mode 3 -0.335570753785845 0.318251526946757 0.402266396456054
ebi-a-GCST90017023 uDf6S8 Irritable bowel syndrome_R8 || id:ebi-a-GCST90017023 Weighted mode 3 -0.328783350508623 0.315082550158181 0.406273341888105
ebi-a-GCST90017024 uDf6S8 Irritable bowel syndrome_R8 || id:ebi-a-GCST90017024 MR Egger 15 0.306768210182052 0.144709305986462 0.0538309941241856
ebi-a-GCST90017024 uDf6S8 Irritable bowel syndrome_R8 || id:ebi-a-GCST90017024 Weighted median 15 0.0526466092678407 0.109008632837624 0.629125441096931
ebi-a-GCST90017024 uDf6S8 Irritable bowel syndrome_R8 || id:ebi-a-GCST90017024 Inverse variance weighted 15 -0.00144348131116371 0.0847361122371621 0.986408678423516
ebi-a-GCST90017024 uDf6S8 Irritable bowel syndrome_R8 || id:ebi-a-GCST90017024 Simple mode 15 0.010922192646061 0.193901833826465 0.955876162159482
ebi-a-GCST90017024 uDf6S8 Irritable bowel syndrome_R8 || id:ebi-a-GCST90017024 Weighted mode 15 0.180977491008533 0.124089857384345 0.166787771288416
ebi-a-GCST90017025 uDf6S8 Irritable bowel syndrome_R8 || id:ebi-a-GCST90017025 MR Egger 13 -0.278012888645205 0.289703464632696 0.357852076628087
ebi-a-GCST90017025 uDf6S8 Irritable bowel syndrome_R8 || id:ebi-a-GCST90017025 Weighted median 13 0.0511010987619232 0.0867685793037407 0.555904526000063
ebi-a-GCST90017025 uDf6S8 Irritable bowel syndrome_R8 || id:ebi-a-GCST90017025 Inverse variance weighted 13 0.000455747736570638 0.0668941425630328 0.994564079071633
ebi-a-GCST90017025 uDf6S8 Irritable bowel syndrome_R8 || id:ebi-a-GCST90017025 Simple mode 13 0.157012803016735 0.161639377829388 0.350533744477541
ebi-a-GCST90017025 uDf6S8 Irritable bowel syndrome_R8 || id:ebi-a-GCST90017025 Weighted mode 13 0.136132821361902 0.159715678367113 0.410711702036439
ebi-a-GCST90017027 uDf6S8 Irritable bowel syndrome_R8 || id:ebi-a-GCST90017027 MR Egger 10 -0.288556514207648 0.307744699401115 0.375865005995837
ebi-a-GCST90017027 uDf6S8 Irritable bowel syndrome_R8 || id:ebi-a-GCST90017027 Weighted median 10 -0.100707485487086 0.0794972447274419 0.205225121104337
ebi-a-GCST90017027 uDf6S8 Irritable bowel syndrome_R8 || id:ebi-a-GCST90017027 Inverse variance weighted 10 -0.0889296102860609 0.0605690705102304 0.142040485135305
ebi-a-GCST90017027 uDf6S8 Irritable bowel syndrome_R8 || id:ebi-a-GCST90017027 Simple mode 10 -0.110114237323539 0.123986598005578 0.39759319152609
ebi-a-GCST90017027 uDf6S8 Irritable bowel syndrome_R8 || id:ebi-a-GCST90017027 Weighted mode 10 -0.107275046897895 0.126761551462827 0.419331477650486
ebi-a-GCST90017028 uDf6S8 Irritable bowel syndrome_R8 || id:ebi-a-GCST90017028 MR Egger 10 0.202441884960576 0.312353416874545 0.535063596343299
ebi-a-GCST90017028 uDf6S8 Irritable bowel syndrome_R8 || id:ebi-a-GCST90017028 Weighted median 10 -0.0896054961495656 0.126994702277048 0.480446553235383
ebi-a-GCST90017028 uDf6S8 Irritable bowel syndrome_R8 || id:ebi-a-GCST90017028 Inverse variance weighted 10 -0.116371950340956 0.103139442711321 0.259194401361613
ebi-a-GCST90017028 uDf6S8 Irritable bowel syndrome_R8 || id:ebi-a-GCST90017028 Simple mode 10 -0.0605012217402745 0.222460359988154 0.791785674134069
ebi-a-GCST90017028 uDf6S8 Irritable bowel syndrome_R8 || id:ebi-a-GCST90017028 Weighted mode 10 -0.069268132983145 0.180636203117825 0.710274241901803
ebi-a-GCST90017029 uDf6S8 Irritable bowel syndrome_R8 || id:ebi-a-GCST90017029 Wald ratio 1 0.0230804854987168 0.321559925129769 0.942779677016404
ebi-a-GCST90017030 uDf6S8 Irritable bowel syndrome_R8 || id:ebi-a-GCST90017030 MR Egger 8 0.0797331031389689 0.158449544414551 0.632753136214318
ebi-a-GCST90017030 uDf6S8 Irritable bowel syndrome_R8 || id:ebi-a-GCST90017030 Weighted median 8 -0.00356714310907503 0.0781768028090687 0.963605814150832
ebi-a-GCST90017030 uDf6S8 Irritable bowel syndrome_R8 || id:ebi-a-GCST90017030 Inverse variance weighted 8 0.0173882734736512 0.0616109473664617 0.777769448610079
ebi-a-GCST90017030 uDf6S8 Irritable bowel syndrome_R8 || id:ebi-a-GCST90017030 Simple mode 8 -0.0290785450523959 0.126075642474415 0.824187525513767
ebi-a-GCST90017030 uDf6S8 Irritable bowel syndrome_R8 || id:ebi-a-GCST90017030 Weighted mode 8 0.027695087188585 0.10899375387654 0.806722245251721
ebi-a-GCST90017031 uDf6S8 Irritable bowel syndrome_R8 || id:ebi-a-GCST90017031 MR Egger 8 0.0322230057909288 0.264685280820054 0.907079249536923
ebi-a-GCST90017031 uDf6S8 Irritable bowel syndrome_R8 || id:ebi-a-GCST90017031 Weighted median 8 -0.0479481414557373 0.0730725108706583 0.511713410891034
ebi-a-GCST90017031 uDf6S8 Irritable bowel syndrome_R8 || id:ebi-a-GCST90017031 Inverse variance weighted 8 -0.0339540931112705 0.0558282249776028 0.543062357546733
ebi-a-GCST90017031 uDf6S8 Irritable bowel syndrome_R8 || id:ebi-a-GCST90017031 Simple mode 8 -0.0665936144563833 0.107602706346654 0.555589515703789
ebi-a-GCST90017031 uDf6S8 Irritable bowel syndrome_R8 || id:ebi-a-GCST90017031 Weighted mode 8 -0.0414630818619161 0.0979081579587329 0.684646436816276
ebi-a-GCST90017032 uDf6S8 Irritable bowel syndrome_R8 || id:ebi-a-GCST90017032 MR Egger 10 0.183169499822858 0.337380111735549 0.601980625651914
ebi-a-GCST90017032 uDf6S8 Irritable bowel syndrome_R8 || id:ebi-a-GCST90017032 Weighted median 10 0.0455260302156578 0.109576368481973 0.677795625312052
ebi-a-GCST90017032 uDf6S8 Irritable bowel syndrome_R8 || id:ebi-a-GCST90017032 Inverse variance weighted 10 0.0756564054235824 0.0860493667228914 0.379281490724056
ebi-a-GCST90017032 uDf6S8 Irritable bowel syndrome_R8 || id:ebi-a-GCST90017032 Simple mode 10 0.161484685829468 0.178132534816998 0.388275313011112
ebi-a-GCST90017032 uDf6S8 Irritable bowel syndrome_R8 || id:ebi-a-GCST90017032 Weighted mode 10 -0.0133569177246426 0.145514741136465 0.928874875182005
ebi-a-GCST90017033 uDf6S8 Irritable bowel syndrome_R8 || id:ebi-a-GCST90017033 MR Egger 6 0.206422482262743 0.239688788355236 0.437686123338227
ebi-a-GCST90017033 uDf6S8 Irritable bowel syndrome_R8 || id:ebi-a-GCST90017033 Weighted median 6 -0.0302492281293328 0.0832270898635902 0.716265685007994
ebi-a-GCST90017033 uDf6S8 Irritable bowel syndrome_R8 || id:ebi-a-GCST90017033 Inverse variance weighted 6 -0.0373311965377196 0.0640191907474612 0.559809092844334
ebi-a-GCST90017033 uDf6S8 Irritable bowel syndrome_R8 || id:ebi-a-GCST90017033 Simple mode 6 -0.0250673975259625 0.114159809946689 0.834879908544697
ebi-a-GCST90017033 uDf6S8 Irritable bowel syndrome_R8 || id:ebi-a-GCST90017033 Weighted mode 6 -0.0250673975259625 0.105636363556617 0.821841404868328
ebi-a-GCST90017034 uDf6S8 Irritable bowel syndrome_R8 || id:ebi-a-GCST90017034 MR Egger 7 0.0938751110738674 0.334946824197377 0.790497246156205
ebi-a-GCST90017034 uDf6S8 Irritable bowel syndrome_R8 || id:ebi-a-GCST90017034 Weighted median 7 0.108284969652539 0.137018434361434 0.429355565537679
ebi-a-GCST90017034 uDf6S8 Irritable bowel syndrome_R8 || id:ebi-a-GCST90017034 Inverse variance weighted 7 0.0215431671385735 0.106787980438336 0.840121747325853
ebi-a-GCST90017034 uDf6S8 Irritable bowel syndrome_R8 || id:ebi-a-GCST90017034 Simple mode 7 0.166042719100197 0.215258686663516 0.469769616851423
ebi-a-GCST90017034 uDf6S8 Irritable bowel syndrome_R8 || id:ebi-a-GCST90017034 Weighted mode 7 0.171389287451566 0.201702586462651 0.428081882769882
ebi-a-GCST90017035 uDf6S8 Irritable bowel syndrome_R8 || id:ebi-a-GCST90017035 MR Egger 10 -0.102878162910532 0.144971944148359 0.498084800037566
ebi-a-GCST90017035 uDf6S8 Irritable bowel syndrome_R8 || id:ebi-a-GCST90017035 Weighted median 10 -0.0980516722014257 0.0594716246341589 0.0992063369129394
ebi-a-GCST90017035 uDf6S8 Irritable bowel syndrome_R8 || id:ebi-a-GCST90017035 Inverse variance weighted 10 -0.0539187282852451 0.045233271411069 0.233255448127784
ebi-a-GCST90017035 uDf6S8 Irritable bowel syndrome_R8 || id:ebi-a-GCST90017035 Simple mode 10 -0.0928330656443956 0.0935531670629007 0.346977328069843
ebi-a-GCST90017035 uDf6S8 Irritable bowel syndrome_R8 || id:ebi-a-GCST90017035 Weighted mode 10 -0.095761267580731 0.0800691101392406 0.262261020755612
ebi-a-GCST90017036 uDf6S8 Irritable bowel syndrome_R8 || id:ebi-a-GCST90017036 MR Egger 12 -0.299117567087396 0.241151327028257 0.243151360980615
ebi-a-GCST90017036 uDf6S8 Irritable bowel syndrome_R8 || id:ebi-a-GCST90017036 Weighted median 12 -0.105131549353123 0.080862729955825 0.193558585776124
ebi-a-GCST90017036 uDf6S8 Irritable bowel syndrome_R8 || id:ebi-a-GCST90017036 Inverse variance weighted 12 -0.0971414120976174 0.0636513813922255 0.126973074085475
ebi-a-GCST90017036 uDf6S8 Irritable bowel syndrome_R8 || id:ebi-a-GCST90017036 Simple mode 12 -0.111290223906075 0.141804913671682 0.449136010948723
ebi-a-GCST90017036 uDf6S8 Irritable bowel syndrome_R8 || id:ebi-a-GCST90017036 Weighted mode 12 -0.111290223906075 0.136847358315264 0.433328523792662
ebi-a-GCST90017037 uDf6S8 Irritable bowel syndrome_R8 || id:ebi-a-GCST90017037 MR Egger 8 0.133238338450451 0.356092969552452 0.721146364712435
ebi-a-GCST90017037 uDf6S8 Irritable bowel syndrome_R8 || id:ebi-a-GCST90017037 Weighted median 8 -0.0837549849480576 0.10442888946282 0.42253625434262
ebi-a-GCST90017037 uDf6S8 Irritable bowel syndrome_R8 || id:ebi-a-GCST90017037 Inverse variance weighted 8 -0.0423150497786373 0.08433893615484 0.615860166894053
ebi-a-GCST90017037 uDf6S8 Irritable bowel syndrome_R8 || id:ebi-a-GCST90017037 Simple mode 8 -0.133947734307459 0.163584044176665 0.439865062284873
ebi-a-GCST90017037 uDf6S8 Irritable bowel syndrome_R8 || id:ebi-a-GCST90017037 Weighted mode 8 -0.133947734307459 0.159093197781113 0.427643105130007
ebi-a-GCST90017038 uDf6S8 Irritable bowel syndrome_R8 || id:ebi-a-GCST90017038 MR Egger 11 0.251136860997239 0.222758654955941 0.288734343518738
ebi-a-GCST90017038 uDf6S8 Irritable bowel syndrome_R8 || id:ebi-a-GCST90017038 Weighted median 11 -0.0138200893877277 0.0593375181566018 0.815834067037432
ebi-a-GCST90017038 uDf6S8 Irritable bowel syndrome_R8 || id:ebi-a-GCST90017038 Inverse variance weighted 11 0.0192409956017448 0.0473236608140929 0.684314291134559
ebi-a-GCST90017038 uDf6S8 Irritable bowel syndrome_R8 || id:ebi-a-GCST90017038 Simple mode 11 -0.0333745867850865 0.0916857165477565 0.723428562606022
ebi-a-GCST90017038 uDf6S8 Irritable bowel syndrome_R8 || id:ebi-a-GCST90017038 Weighted mode 11 -0.0243555967105617 0.085919273548983 0.78259801911874
ebi-a-GCST90017039 uDf6S8 Irritable bowel syndrome_R8 || id:ebi-a-GCST90017039 MR Egger 5 0.567250730760664 0.831490379523104 0.544059186618119
ebi-a-GCST90017039 uDf6S8 Irritable bowel syndrome_R8 || id:ebi-a-GCST90017039 Weighted median 5 -0.00229899704942876 0.166462869017536 0.988980870328387
ebi-a-GCST90017039 uDf6S8 Irritable bowel syndrome_R8 || id:ebi-a-GCST90017039 Inverse variance weighted 5 -0.0205671086176493 0.13340043386449 0.877471181900398
ebi-a-GCST90017039 uDf6S8 Irritable bowel syndrome_R8 || id:ebi-a-GCST90017039 Simple mode 5 -0.000594823557379276 0.230326861161324 0.998063113238622
ebi-a-GCST90017039 uDf6S8 Irritable bowel syndrome_R8 || id:ebi-a-GCST90017039 Weighted mode 5 0.0236594910421728 0.244203209068955 0.927478417195587
ebi-a-GCST90017040 uDf6S8 Irritable bowel syndrome_R8 || id:ebi-a-GCST90017040 MR Egger 13 -0.398942564326231 0.198580526180045 0.0697234458384132
ebi-a-GCST90017040 uDf6S8 Irritable bowel syndrome_R8 || id:ebi-a-GCST90017040 Weighted median 13 -0.116076520872211 0.0707243616990491 0.100745054523966
ebi-a-GCST90017040 uDf6S8 Irritable bowel syndrome_R8 || id:ebi-a-GCST90017040 Inverse variance weighted 13 -0.0897181249694809 0.0526023593527086 0.0880842056434515
ebi-a-GCST90017040 uDf6S8 Irritable bowel syndrome_R8 || id:ebi-a-GCST90017040 Simple mode 13 -0.179720193457987 0.124300166375587 0.173825059891093
ebi-a-GCST90017040 uDf6S8 Irritable bowel syndrome_R8 || id:ebi-a-GCST90017040 Weighted mode 13 -0.179720193457987 0.123141826193303 0.170116780997284
ebi-a-GCST90017041 uDf6S8 Irritable bowel syndrome_R8 || id:ebi-a-GCST90017041 MR Egger 14 -0.32753680413543 0.202864938646037 0.132377503791392
ebi-a-GCST90017041 uDf6S8 Irritable bowel syndrome_R8 || id:ebi-a-GCST90017041 Weighted median 14 0.0851910676009489 0.0958523595260072 0.374124649273425
ebi-a-GCST90017041 uDf6S8 Irritable bowel syndrome_R8 || id:ebi-a-GCST90017041 Inverse variance weighted 14 0.00315050073881699 0.0776468903296159 0.967634939050093
ebi-a-GCST90017041 uDf6S8 Irritable bowel syndrome_R8 || id:ebi-a-GCST90017041 Simple mode 14 0.143170267999237 0.159248717346948 0.384983811770432
ebi-a-GCST90017041 uDf6S8 Irritable bowel syndrome_R8 || id:ebi-a-GCST90017041 Weighted mode 14 0.128152735191806 0.198122335064331 0.528993774091929
ebi-a-GCST90017042 uDf6S8 Irritable bowel syndrome_R8 || id:ebi-a-GCST90017042 MR Egger 13 0.0134723058062672 0.220445207496215 0.952364617480914
ebi-a-GCST90017042 uDf6S8 Irritable bowel syndrome_R8 || id:ebi-a-GCST90017042 Weighted median 13 -0.0698341553418059 0.0712184029923323 0.326808118475887
ebi-a-GCST90017042 uDf6S8 Irritable bowel syndrome_R8 || id:ebi-a-GCST90017042 Inverse variance weighted 13 -0.109582608756103 0.0559561589889381 0.0501871452819678
ebi-a-GCST90017042 uDf6S8 Irritable bowel syndrome_R8 || id:ebi-a-GCST90017042 Simple mode 13 -0.0173720741751939 0.13967482535196 0.903077411987769
ebi-a-GCST90017042 uDf6S8 Irritable bowel syndrome_R8 || id:ebi-a-GCST90017042 Weighted mode 13 -0.0332570522660405 0.129801366490925 0.802124418102308
ebi-a-GCST90017043 uDf6S8 Irritable bowel syndrome_R8 || id:ebi-a-GCST90017043 MR Egger 8 -0.0917394469082337 0.410491907777378 0.830571633160189
ebi-a-GCST90017043 uDf6S8 Irritable bowel syndrome_R8 || id:ebi-a-GCST90017043 Weighted median 8 0.0370737198441596 0.106616551444983 0.728043341811604
ebi-a-GCST90017043 uDf6S8 Irritable bowel syndrome_R8 || id:ebi-a-GCST90017043 Inverse variance weighted 8 0.0239923210406844 0.0872548044126217 0.783340453660774
ebi-a-GCST90017043 uDf6S8 Irritable bowel syndrome_R8 || id:ebi-a-GCST90017043 Simple mode 8 0.0818648719149698 0.15561519170665 0.615087702454018
ebi-a-GCST90017043 uDf6S8 Irritable bowel syndrome_R8 || id:ebi-a-GCST90017043 Weighted mode 8 0.0845966897421621 0.157185586957938 0.607121951025608
ebi-a-GCST90017044 uDf6S8 Irritable bowel syndrome_R8 || id:ebi-a-GCST90017044 MR Egger 11 -0.0778317525660365 0.267950922525446 0.778038521864859
ebi-a-GCST90017044 uDf6S8 Irritable bowel syndrome_R8 || id:ebi-a-GCST90017044 Weighted median 11 -0.0501240390503213 0.0648719347563491 0.439722804515518
ebi-a-GCST90017044 uDf6S8 Irritable bowel syndrome_R8 || id:ebi-a-GCST90017044 Inverse variance weighted 11 -0.0305012165841583 0.0446580621515122 0.494610236536156
ebi-a-GCST90017044 uDf6S8 Irritable bowel syndrome_R8 || id:ebi-a-GCST90017044 Simple mode 11 -0.120033153582974 0.112287691624557 0.310203655654543
ebi-a-GCST90017044 uDf6S8 Irritable bowel syndrome_R8 || id:ebi-a-GCST90017044 Weighted mode 11 -0.121823928261162 0.100961760175585 0.255342198809894
ebi-a-GCST90017045 uDf6S8 Irritable bowel syndrome_R8 || id:ebi-a-GCST90017045 MR Egger 15 0.383280119744814 0.169514273673335 0.0415505767042624
ebi-a-GCST90017045 uDf6S8 Irritable bowel syndrome_R8 || id:ebi-a-GCST90017045 Weighted median 15 0.0189837383697681 0.0788108835729667 0.809650358537213
ebi-a-GCST90017045 uDf6S8 Irritable bowel syndrome_R8 || id:ebi-a-GCST90017045 Inverse variance weighted 15 0.0858012915836314 0.0630433168714163 0.173517011308094
ebi-a-GCST90017045 uDf6S8 Irritable bowel syndrome_R8 || id:ebi-a-GCST90017045 Simple mode 15 0.0810847093748347 0.135243615606639 0.558388048163433
ebi-a-GCST90017045 uDf6S8 Irritable bowel syndrome_R8 || id:ebi-a-GCST90017045 Weighted mode 15 0.0843876533875441 0.114447702819754 0.473089107449904
ebi-a-GCST90017046 uDf6S8 Irritable bowel syndrome_R8 || id:ebi-a-GCST90017046 MR Egger 11 0.0744076422656905 0.268270152398607 0.78776858203499
ebi-a-GCST90017046 uDf6S8 Irritable bowel syndrome_R8 || id:ebi-a-GCST90017046 Weighted median 11 -0.0506684051918313 0.0564335180050911 0.369269576927836
ebi-a-GCST90017046 uDf6S8 Irritable bowel syndrome_R8 || id:ebi-a-GCST90017046 Inverse variance weighted 11 -0.0418821528383045 0.0430730911154489 0.330876079829998
ebi-a-GCST90017046 uDf6S8 Irritable bowel syndrome_R8 || id:ebi-a-GCST90017046 Simple mode 11 -0.0576582732890149 0.0912339184701598 0.541576027575388
ebi-a-GCST90017046 uDf6S8 Irritable bowel syndrome_R8 || id:ebi-a-GCST90017046 Weighted mode 11 -0.0593113778861614 0.0910557118656215 0.529488629083461
ebi-a-GCST90017047 uDf6S8 Irritable bowel syndrome_R8 || id:ebi-a-GCST90017047 MR Egger 14 -0.260254411312367 0.26621241590244 0.347560432405412
ebi-a-GCST90017047 uDf6S8 Irritable bowel syndrome_R8 || id:ebi-a-GCST90017047 Weighted median 14 -0.0541692940884812 0.110927261906499 0.625314938714845
ebi-a-GCST90017047 uDf6S8 Irritable bowel syndrome_R8 || id:ebi-a-GCST90017047 Inverse variance weighted 14 -0.100854202378911 0.0877076249103691 0.250188797016962
ebi-a-GCST90017047 uDf6S8 Irritable bowel syndrome_R8 || id:ebi-a-GCST90017047 Simple mode 14 0.0541842933192311 0.185006314806992 0.774237961221907
ebi-a-GCST90017047 uDf6S8 Irritable bowel syndrome_R8 || id:ebi-a-GCST90017047 Weighted mode 14 -0.012201650746863 0.174644067444999 0.945363753150711
ebi-a-GCST90017048 uDf6S8 Irritable bowel syndrome_R8 || id:ebi-a-GCST90017048 MR Egger 13 -0.0861351329915934 0.265378888404607 0.75159213331498
ebi-a-GCST90017048 uDf6S8 Irritable bowel syndrome_R8 || id:ebi-a-GCST90017048 Weighted median 13 0.0339537117463838 0.120911352078247 0.778852358861201
ebi-a-GCST90017048 uDf6S8 Irritable bowel syndrome_R8 || id:ebi-a-GCST90017048 Inverse variance weighted 13 0.0266670851320941 0.0883236340701932 0.762709479743241
ebi-a-GCST90017048 uDf6S8 Irritable bowel syndrome_R8 || id:ebi-a-GCST90017048 Simple mode 13 0.0424975758397941 0.202789381125034 0.837522780080249
ebi-a-GCST90017048 uDf6S8 Irritable bowel syndrome_R8 || id:ebi-a-GCST90017048 Weighted mode 13 -0.0159379450760266 0.188064962788311 0.933859983811108
ebi-a-GCST90017049 uDf6S8 Irritable bowel syndrome_R8 || id:ebi-a-GCST90017049 MR Egger 11 0.141296904635378 0.397738663979394 0.73058515375141
ebi-a-GCST90017049 uDf6S8 Irritable bowel syndrome_R8 || id:ebi-a-GCST90017049 Weighted median 11 0.00199196218011364 0.122929984841785 0.987071613805924
ebi-a-GCST90017049 uDf6S8 Irritable bowel syndrome_R8 || id:ebi-a-GCST90017049 Inverse variance weighted 11 -0.0655136640883302 0.0951836902062846 0.491272281491083
ebi-a-GCST90017049 uDf6S8 Irritable bowel syndrome_R8 || id:ebi-a-GCST90017049 Simple mode 11 0.0376596855637995 0.185871816237842 0.843501920298925
ebi-a-GCST90017049 uDf6S8 Irritable bowel syndrome_R8 || id:ebi-a-GCST90017049 Weighted mode 11 0.0418647482415538 0.179838503324233 0.820619325121714
ebi-a-GCST90017050 uDf6S8 Irritable bowel syndrome_R8 || id:ebi-a-GCST90017050 MR Egger 15 0.242638535844353 0.193038646113562 0.23088923943246
ebi-a-GCST90017050 uDf6S8 Irritable bowel syndrome_R8 || id:ebi-a-GCST90017050 Weighted median 15 0.0963010188749817 0.10149482615629 0.342708670100512
ebi-a-GCST90017050 uDf6S8 Irritable bowel syndrome_R8 || id:ebi-a-GCST90017050 Inverse variance weighted 15 0.0808318541694692 0.0773707182733437 0.296145721858709
ebi-a-GCST90017050 uDf6S8 Irritable bowel syndrome_R8 || id:ebi-a-GCST90017050 Simple mode 15 0.0952131807519696 0.159672824957044 0.560492390983099
ebi-a-GCST90017050 uDf6S8 Irritable bowel syndrome_R8 || id:ebi-a-GCST90017050 Weighted mode 15 0.0952131807519696 0.127895633455631 0.468911022589031
ebi-a-GCST90017051 uDf6S8 Irritable bowel syndrome_R8 || id:ebi-a-GCST90017051 MR Egger 8 -0.268541698766721 0.541415098351332 0.637537409026077
ebi-a-GCST90017051 uDf6S8 Irritable bowel syndrome_R8 || id:ebi-a-GCST90017051 Weighted median 8 0.00525290588373292 0.147964458219507 0.971680143087252
ebi-a-GCST90017051 uDf6S8 Irritable bowel syndrome_R8 || id:ebi-a-GCST90017051 Inverse variance weighted 8 0.0285982305405291 0.113055073454722 0.800300359565014
ebi-a-GCST90017051 uDf6S8 Irritable bowel syndrome_R8 || id:ebi-a-GCST90017051 Simple mode 8 -0.0201705520204127 0.212169612472076 0.926924996851234
ebi-a-GCST90017051 uDf6S8 Irritable bowel syndrome_R8 || id:ebi-a-GCST90017051 Weighted mode 8 -0.0510546452899757 0.218305870876681 0.821780283600925
ebi-a-GCST90017027 uDf6S8 Irritable bowel syndrome_R8 || id:ebi-a-GCST90017027 MR Egger 10 -0.288556514207648 0.307744699401115 0.375865005995837
ebi-a-GCST90017027 uDf6S8 Irritable bowel syndrome_R8 || id:ebi-a-GCST90017027 Weighted median 10 -0.100707485487086 0.0789103170887769 0.20187524992097
ebi-a-GCST90017027 uDf6S8 Irritable bowel syndrome_R8 || id:ebi-a-GCST90017027 Inverse variance weighted 10 -0.0889296102860609 0.0605690705102304 0.142040485135305
ebi-a-GCST90017027 uDf6S8 Irritable bowel syndrome_R8 || id:ebi-a-GCST90017027 Simple mode 10 -0.110114237323539 0.120782137299837 0.385707323468023
ebi-a-GCST90017027 uDf6S8 Irritable bowel syndrome_R8 || id:ebi-a-GCST90017027 Weighted mode 10 -0.107275046897895 0.126993683270151 0.420150680928718
ebi-a-GCST90017028 uDf6S8 Irritable bowel syndrome_R8 || id:ebi-a-GCST90017028 MR Egger 10 0.202441884960576 0.312353416874545 0.535063596343299
ebi-a-GCST90017028 uDf6S8 Irritable bowel syndrome_R8 || id:ebi-a-GCST90017028 Weighted median 10 -0.0896054961495656 0.127309451713696 0.48153236327294
ebi-a-GCST90017028 uDf6S8 Irritable bowel syndrome_R8 || id:ebi-a-GCST90017028 Inverse variance weighted 10 -0.116371950340956 0.103139442711321 0.259194401361613
ebi-a-GCST90017028 uDf6S8 Irritable bowel syndrome_R8 || id:ebi-a-GCST90017028 Simple mode 10 -0.0605012217402745 0.211542271331931 0.781351447191086
ebi-a-GCST90017028 uDf6S8 Irritable bowel syndrome_R8 || id:ebi-a-GCST90017028 Weighted mode 10 -0.069268132983145 0.193437366894849 0.728530388987857
ebi-a-GCST90017029 uDf6S8 Irritable bowel syndrome_R8 || id:ebi-a-GCST90017029 Wald ratio 1 0.0230804854987168 0.321559925129769 0.942779677016404
ebi-a-GCST90017030 uDf6S8 Irritable bowel syndrome_R8 || id:ebi-a-GCST90017030 MR Egger 8 0.0797331031389689 0.158449544414551 0.632753136214318
ebi-a-GCST90017030 uDf6S8 Irritable bowel syndrome_R8 || id:ebi-a-GCST90017030 Weighted median 8 -0.00356714310907503 0.0820032031644102 0.965302927866627
ebi-a-GCST90017030 uDf6S8 Irritable bowel syndrome_R8 || id:ebi-a-GCST90017030 Inverse variance weighted 8 0.0173882734736512 0.0616109473664617 0.777769448610079
ebi-a-GCST90017030 uDf6S8 Irritable bowel syndrome_R8 || id:ebi-a-GCST90017030 Simple mode 8 -0.0290785450523959 0.124626243562986 0.822184454853401
ebi-a-GCST90017030 uDf6S8 Irritable bowel syndrome_R8 || id:ebi-a-GCST90017030 Weighted mode 8 0.027695087188585 0.10672799105979 0.802721607380313
ebi-a-GCST90017031 uDf6S8 Irritable bowel syndrome_R8 || id:ebi-a-GCST90017031 MR Egger 8 0.0322230057909288 0.264685280820054 0.907079249536923
ebi-a-GCST90017031 uDf6S8 Irritable bowel syndrome_R8 || id:ebi-a-GCST90017031 Weighted median 8 -0.0479481414557373 0.0740963702270056 0.517563903914932
ebi-a-GCST90017031 uDf6S8 Irritable bowel syndrome_R8 || id:ebi-a-GCST90017031 Inverse variance weighted 8 -0.0339540931112705 0.0558282249776028 0.543062357546733
ebi-a-GCST90017031 uDf6S8 Irritable bowel syndrome_R8 || id:ebi-a-GCST90017031 Simple mode 8 -0.0665936144563833 0.0990895536449196 0.523103658207516
ebi-a-GCST90017031 uDf6S8 Irritable bowel syndrome_R8 || id:ebi-a-GCST90017031 Weighted mode 8 -0.0414630818619161 0.100510457437632 0.692296021490999
ebi-a-GCST90017032 uDf6S8 Irritable bowel syndrome_R8 || id:ebi-a-GCST90017032 MR Egger 10 0.183169499822858 0.337380111735549 0.601980625651914
ebi-a-GCST90017032 uDf6S8 Irritable bowel syndrome_R8 || id:ebi-a-GCST90017032 Weighted median 10 0.0455260302156578 0.110103003917757 0.679250713685395
ebi-a-GCST90017032 uDf6S8 Irritable bowel syndrome_R8 || id:ebi-a-GCST90017032 Inverse variance weighted 10 0.0756564054235824 0.0860493667228914 0.379281490724056
ebi-a-GCST90017032 uDf6S8 Irritable bowel syndrome_R8 || id:ebi-a-GCST90017032 Simple mode 10 0.161484685829468 0.177597360437118 0.386907418060069
ebi-a-GCST90017032 uDf6S8 Irritable bowel syndrome_R8 || id:ebi-a-GCST90017032 Weighted mode 10 -0.0133569177246426 0.151837354432217 0.931827916510408
ebi-a-GCST90017033 uDf6S8 Irritable bowel syndrome_R8 || id:ebi-a-GCST90017033 MR Egger 6 0.206422482262743 0.239688788355236 0.437686123338227
ebi-a-GCST90017033 uDf6S8 Irritable bowel syndrome_R8 || id:ebi-a-GCST90017033 Weighted median 6 -0.0302492281293328 0.0831339351210255 0.715961527026703
ebi-a-GCST90017033 uDf6S8 Irritable bowel syndrome_R8 || id:ebi-a-GCST90017033 Inverse variance weighted 6 -0.0373311965377196 0.0640191907474612 0.559809092844334
ebi-a-GCST90017033 uDf6S8 Irritable bowel syndrome_R8 || id:ebi-a-GCST90017033 Simple mode 6 -0.0250673975259625 0.109867835894663 0.828559424355966
ebi-a-GCST90017033 uDf6S8 Irritable bowel syndrome_R8 || id:ebi-a-GCST90017033 Weighted mode 6 -0.0250673975259625 0.110001090632564 0.828762851920001
ebi-a-GCST90017034 uDf6S8 Irritable bowel syndrome_R8 || id:ebi-a-GCST90017034 MR Egger 7 0.0938751110738674 0.334946824197377 0.790497246156205
ebi-a-GCST90017034 uDf6S8 Irritable bowel syndrome_R8 || id:ebi-a-GCST90017034 Weighted median 7 0.108284969652539 0.135547739070123 0.424366021237246
ebi-a-GCST90017034 uDf6S8 Irritable bowel syndrome_R8 || id:ebi-a-GCST90017034 Inverse variance weighted 7 0.0215431671385735 0.106787980438336 0.840121747325853
ebi-a-GCST90017034 uDf6S8 Irritable bowel syndrome_R8 || id:ebi-a-GCST90017034 Simple mode 7 0.166042719100197 0.226028224245727 0.490279378271283
ebi-a-GCST90017034 uDf6S8 Irritable bowel syndrome_R8 || id:ebi-a-GCST90017034 Weighted mode 7 0.171389287451566 0.219943347170315 0.465451598478051
ebi-a-GCST90017035 uDf6S8 Irritable bowel syndrome_R8 || id:ebi-a-GCST90017035 MR Egger 10 -0.102878162910532 0.144971944148359 0.498084800037566
ebi-a-GCST90017035 uDf6S8 Irritable bowel syndrome_R8 || id:ebi-a-GCST90017035 Weighted median 10 -0.0980516722014257 0.0602724999607896 0.103778280037017
ebi-a-GCST90017035 uDf6S8 Irritable bowel syndrome_R8 || id:ebi-a-GCST90017035 Inverse variance weighted 10 -0.0539187282852451 0.045233271411069 0.233255448127784
ebi-a-GCST90017035 uDf6S8 Irritable bowel syndrome_R8 || id:ebi-a-GCST90017035 Simple mode 10 -0.0928330656443956 0.090392112414106 0.331228246382987
ebi-a-GCST90017035 uDf6S8 Irritable bowel syndrome_R8 || id:ebi-a-GCST90017035 Weighted mode 10 -0.095761267580731 0.0777192024097706 0.249114108580731
ebi-a-GCST90017036 uDf6S8 Irritable bowel syndrome_R8 || id:ebi-a-GCST90017036 MR Egger 12 -0.299117567087396 0.241151327028257 0.243151360980615
ebi-a-GCST90017036 uDf6S8 Irritable bowel syndrome_R8 || id:ebi-a-GCST90017036 Weighted median 12 -0.105131549353123 0.0807828349317164 0.19311832132282
ebi-a-GCST90017036 uDf6S8 Irritable bowel syndrome_R8 || id:ebi-a-GCST90017036 Inverse variance weighted 12 -0.0971414120976174 0.0636513813922255 0.126973074085475
ebi-a-GCST90017036 uDf6S8 Irritable bowel syndrome_R8 || id:ebi-a-GCST90017036 Simple mode 12 -0.111290223906075 0.13380251436298 0.423238709134017
ebi-a-GCST90017036 uDf6S8 Irritable bowel syndrome_R8 || id:ebi-a-GCST90017036 Weighted mode 12 -0.111290223906075 0.130719713487674 0.412716903204157
ebi-a-GCST90017037 uDf6S8 Irritable bowel syndrome_R8 || id:ebi-a-GCST90017037 MR Egger 8 0.133238338450451 0.356092969552452 0.721146364712435
ebi-a-GCST90017037 uDf6S8 Irritable bowel syndrome_R8 || id:ebi-a-GCST90017037 Weighted median 8 -0.0837549849480576 0.104999327140067 0.425061068502474
ebi-a-GCST90017037 uDf6S8 Irritable bowel syndrome_R8 || id:ebi-a-GCST90017037 Inverse variance weighted 8 -0.0423150497786373 0.08433893615484 0.615860166894053
ebi-a-GCST90017037 uDf6S8 Irritable bowel syndrome_R8 || id:ebi-a-GCST90017037 Simple mode 8 -0.133947734307459 0.155355969917996 0.417134299182114
ebi-a-GCST90017037 uDf6S8 Irritable bowel syndrome_R8 || id:ebi-a-GCST90017037 Weighted mode 8 -0.133947734307459 0.152574171127479 0.409107367622083
ebi-a-GCST90017038 uDf6S8 Irritable bowel syndrome_R8 || id:ebi-a-GCST90017038 MR Egger 11 0.251136860997239 0.222758654955941 0.288734343518738
ebi-a-GCST90017038 uDf6S8 Irritable bowel syndrome_R8 || id:ebi-a-GCST90017038 Weighted median 11 -0.0138200893877277 0.0615413246552982 0.822316913902159
ebi-a-GCST90017038 uDf6S8 Irritable bowel syndrome_R8 || id:ebi-a-GCST90017038 Inverse variance weighted 11 0.0192409956017448 0.0473236608140929 0.684314291134559
ebi-a-GCST90017038 uDf6S8 Irritable bowel syndrome_R8 || id:ebi-a-GCST90017038 Simple mode 11 -0.0333745867850865 0.0886907089519932 0.714552376598713
ebi-a-GCST90017038 uDf6S8 Irritable bowel syndrome_R8 || id:ebi-a-GCST90017038 Weighted mode 11 -0.0243555967105617 0.0901368053202374 0.792495514396536
ebi-a-GCST90017039 uDf6S8 Irritable bowel syndrome_R8 || id:ebi-a-GCST90017039 MR Egger 5 0.567250730760664 0.831490379523104 0.544059186618119
ebi-a-GCST90017039 uDf6S8 Irritable bowel syndrome_R8 || id:ebi-a-GCST90017039 Weighted median 5 -0.00229899704942876 0.163920103810385 0.98880995025318
ebi-a-GCST90017039 uDf6S8 Irritable bowel syndrome_R8 || id:ebi-a-GCST90017039 Inverse variance weighted 5 -0.0205671086176493 0.13340043386449 0.877471181900398
ebi-a-GCST90017039 uDf6S8 Irritable bowel syndrome_R8 || id:ebi-a-GCST90017039 Simple mode 5 -0.000594823557379276 0.226582477889795 0.998031105354343
ebi-a-GCST90017039 uDf6S8 Irritable bowel syndrome_R8 || id:ebi-a-GCST90017039 Weighted mode 5 0.0236594910421728 0.241433368099542 0.926649714584136
ebi-a-GCST90017040 uDf6S8 Irritable bowel syndrome_R8 || id:ebi-a-GCST90017040 MR Egger 13 -0.398942564326231 0.198580526180045 0.0697234458384132
ebi-a-GCST90017040 uDf6S8 Irritable bowel syndrome_R8 || id:ebi-a-GCST90017040 Weighted median 13 -0.116076520872211 0.0742477901732649 0.11796637377467
ebi-a-GCST90017040 uDf6S8 Irritable bowel syndrome_R8 || id:ebi-a-GCST90017040 Inverse variance weighted 13 -0.0897181249694809 0.0526023593527086 0.0880842056434515
ebi-a-GCST90017040 uDf6S8 Irritable bowel syndrome_R8 || id:ebi-a-GCST90017040 Simple mode 13 -0.179720193457987 0.121366862811788 0.164432116270791
ebi-a-GCST90017040 uDf6S8 Irritable bowel syndrome_R8 || id:ebi-a-GCST90017040 Weighted mode 13 -0.179720193457987 0.120662953918795 0.162177680885861
ebi-a-GCST90017041 uDf6S8 Irritable bowel syndrome_R8 || id:ebi-a-GCST90017041 MR Egger 14 -0.32753680413543 0.202864938646037 0.132377503791392
ebi-a-GCST90017041 uDf6S8 Irritable bowel syndrome_R8 || id:ebi-a-GCST90017041 Weighted median 14 0.0851910676009489 0.0951430976618237 0.370573649139462
ebi-a-GCST90017041 uDf6S8 Irritable bowel syndrome_R8 || id:ebi-a-GCST90017041 Inverse variance weighted 14 0.00315050073881699 0.0776468903296159 0.967634939050093
ebi-a-GCST90017041 uDf6S8 Irritable bowel syndrome_R8 || id:ebi-a-GCST90017041 Simple mode 14 0.143170267999237 0.167548436246485 0.408299077648451
ebi-a-GCST90017041 uDf6S8 Irritable bowel syndrome_R8 || id:ebi-a-GCST90017041 Weighted mode 14 0.128152735191806 0.192566121653608 0.517365049675416
ebi-a-GCST90017042 uDf6S8 Irritable bowel syndrome_R8 || id:ebi-a-GCST90017042 MR Egger 13 0.0134723058062672 0.220445207496215 0.952364617480914
ebi-a-GCST90017042 uDf6S8 Irritable bowel syndrome_R8 || id:ebi-a-GCST90017042 Weighted median 13 -0.0698341553418059 0.0702944825661695 0.320490001131457
ebi-a-GCST90017042 uDf6S8 Irritable bowel syndrome_R8 || id:ebi-a-GCST90017042 Inverse variance weighted 13 -0.109582608756103 0.0559561589889381 0.0501871452819678
ebi-a-GCST90017042 uDf6S8 Irritable bowel syndrome_R8 || id:ebi-a-GCST90017042 Simple mode 13 -0.0173720741751939 0.123504220852417 0.890472276670917
ebi-a-GCST90017042 uDf6S8 Irritable bowel syndrome_R8 || id:ebi-a-GCST90017042 Weighted mode 13 -0.0332570522660405 0.13015384950349 0.802647812628587
ebi-a-GCST90017043 uDf6S8 Irritable bowel syndrome_R8 || id:ebi-a-GCST90017043 MR Egger 8 -0.0917394469082337 0.410491907777378 0.830571633160189
ebi-a-GCST90017043 uDf6S8 Irritable bowel syndrome_R8 || id:ebi-a-GCST90017043 Weighted median 8 0.0370737198441596 0.108227169842983 0.731933527034498
ebi-a-GCST90017043 uDf6S8 Irritable bowel syndrome_R8 || id:ebi-a-GCST90017043 Inverse variance weighted 8 0.0239923210406844 0.0872548044126217 0.783340453660774
ebi-a-GCST90017043 uDf6S8 Irritable bowel syndrome_R8 || id:ebi-a-GCST90017043 Simple mode 8 0.0818648719149698 0.15662693067168 0.61733053325219
ebi-a-GCST90017043 uDf6S8 Irritable bowel syndrome_R8 || id:ebi-a-GCST90017043 Weighted mode 8 0.0845966897421621 0.163097018393197 0.619966205233715
ebi-a-GCST90017044 uDf6S8 Irritable bowel syndrome_R8 || id:ebi-a-GCST90017044 MR Egger 11 -0.0778317525660365 0.267950922525446 0.778038521864859
ebi-a-GCST90017044 uDf6S8 Irritable bowel syndrome_R8 || id:ebi-a-GCST90017044 Weighted median 11 -0.0501240390503213 0.0614059482778404 0.414343813625735
ebi-a-GCST90017044 uDf6S8 Irritable bowel syndrome_R8 || id:ebi-a-GCST90017044 Inverse variance weighted 11 -0.0305012165841583 0.0446580621515122 0.494610236536156
ebi-a-GCST90017044 uDf6S8 Irritable bowel syndrome_R8 || id:ebi-a-GCST90017044 Simple mode 11 -0.120033153582974 0.110444830858 0.302620199626075
ebi-a-GCST90017044 uDf6S8 Irritable bowel syndrome_R8 || id:ebi-a-GCST90017044 Weighted mode 11 -0.121823928261162 0.112732146356528 0.305225515858416
ebi-a-GCST90017045 uDf6S8 Irritable bowel syndrome_R8 || id:ebi-a-GCST90017045 MR Egger 15 0.383280119744814 0.169514273673335 0.0415505767042624
ebi-a-GCST90017045 uDf6S8 Irritable bowel syndrome_R8 || id:ebi-a-GCST90017045 Weighted median 15 0.0189837383697681 0.0809634721268891 0.814617886131389
ebi-a-GCST90017045 uDf6S8 Irritable bowel syndrome_R8 || id:ebi-a-GCST90017045 Inverse variance weighted 15 0.0858012915836314 0.0630433168714163 0.173517011308094
ebi-a-GCST90017045 uDf6S8 Irritable bowel syndrome_R8 || id:ebi-a-GCST90017045 Simple mode 15 0.0810847093748347 0.133082163174259 0.552096832092069
ebi-a-GCST90017045 uDf6S8 Irritable bowel syndrome_R8 || id:ebi-a-GCST90017045 Weighted mode 15 0.0843876533875441 0.121112688882336 0.497354017520932
ebi-a-GCST90017046 uDf6S8 Irritable bowel syndrome_R8 || id:ebi-a-GCST90017046 MR Egger 11 0.0744076422656905 0.268270152398607 0.78776858203499
ebi-a-GCST90017046 uDf6S8 Irritable bowel syndrome_R8 || id:ebi-a-GCST90017046 Weighted median 11 -0.0506684051918313 0.0603499923671301 0.401146160403716
ebi-a-GCST90017046 uDf6S8 Irritable bowel syndrome_R8 || id:ebi-a-GCST90017046 Inverse variance weighted 11 -0.0418821528383045 0.0430730911154489 0.330876079829998
ebi-a-GCST90017046 uDf6S8 Irritable bowel syndrome_R8 || id:ebi-a-GCST90017046 Simple mode 11 -0.0576582732890149 0.0946830880053835 0.556130967060049
ebi-a-GCST90017046 uDf6S8 Irritable bowel syndrome_R8 || id:ebi-a-GCST90017046 Weighted mode 11 -0.0593113778861614 0.095325042106122 0.547733050889531
ebi-a-GCST90017047 uDf6S8 Irritable bowel syndrome_R8 || id:ebi-a-GCST90017047 MR Egger 14 -0.260254411312367 0.26621241590244 0.347560432405412
ebi-a-GCST90017047 uDf6S8 Irritable bowel syndrome_R8 || id:ebi-a-GCST90017047 Weighted median 14 -0.0541692940884812 0.110172867530014 0.622948796898773
ebi-a-GCST90017047 uDf6S8 Irritable bowel syndrome_R8 || id:ebi-a-GCST90017047 Inverse variance weighted 14 -0.100854202378911 0.0877076249103691 0.250188797016962
ebi-a-GCST90017047 uDf6S8 Irritable bowel syndrome_R8 || id:ebi-a-GCST90017047 Simple mode 14 0.0541842933192311 0.207298272650739 0.797892319670432
ebi-a-GCST90017047 uDf6S8 Irritable bowel syndrome_R8 || id:ebi-a-GCST90017047 Weighted mode 14 -0.012201650746863 0.172891811470597 0.94481099974021
ebi-a-GCST90017048 uDf6S8 Irritable bowel syndrome_R8 || id:ebi-a-GCST90017048 MR Egger 13 -0.0861351329915934 0.265378888404607 0.75159213331498
ebi-a-GCST90017048 uDf6S8 Irritable bowel syndrome_R8 || id:ebi-a-GCST90017048 Weighted median 13 0.0339537117463838 0.120525590773655 0.778163038374939
ebi-a-GCST90017048 uDf6S8 Irritable bowel syndrome_R8 || id:ebi-a-GCST90017048 Inverse variance weighted 13 0.0266670851320941 0.0883236340701932 0.762709479743241
ebi-a-GCST90017048 uDf6S8 Irritable bowel syndrome_R8 || id:ebi-a-GCST90017048 Simple mode 13 0.0424975758397941 0.200510053897063 0.835705331031056
ebi-a-GCST90017048 uDf6S8 Irritable bowel syndrome_R8 || id:ebi-a-GCST90017048 Weighted mode 13 -0.0159379450760266 0.195906467753702 0.936500904701555
ebi-a-GCST90017049 uDf6S8 Irritable bowel syndrome_R8 || id:ebi-a-GCST90017049 MR Egger 11 0.141296904635378 0.397738663979394 0.73058515375141
ebi-a-GCST90017049 uDf6S8 Irritable bowel syndrome_R8 || id:ebi-a-GCST90017049 Weighted median 11 0.00199196218011364 0.11995143849411 0.986750614731825
ebi-a-GCST90017049 uDf6S8 Irritable bowel syndrome_R8 || id:ebi-a-GCST90017049 Inverse variance weighted 11 -0.0655136640883302 0.0951836902062846 0.491272281491083
ebi-a-GCST90017049 uDf6S8 Irritable bowel syndrome_R8 || id:ebi-a-GCST90017049 Simple mode 11 0.0376596855637995 0.196198800662201 0.851625745209379
ebi-a-GCST90017049 uDf6S8 Irritable bowel syndrome_R8 || id:ebi-a-GCST90017049 Weighted mode 11 0.0418647482415538 0.18180111077356 0.822518357821176
ebi-a-GCST90017050 uDf6S8 Irritable bowel syndrome_R8 || id:ebi-a-GCST90017050 MR Egger 15 0.242638535844353 0.193038646113562 0.23088923943246
ebi-a-GCST90017050 uDf6S8 Irritable bowel syndrome_R8 || id:ebi-a-GCST90017050 Weighted median 15 0.0963010188749817 0.104163026075822 0.355214554247529
ebi-a-GCST90017050 uDf6S8 Irritable bowel syndrome_R8 || id:ebi-a-GCST90017050 Inverse variance weighted 15 0.0808318541694692 0.0773707182733437 0.296145721858709
ebi-a-GCST90017050 uDf6S8 Irritable bowel syndrome_R8 || id:ebi-a-GCST90017050 Simple mode 15 0.0952131807519696 0.161357281796509 0.564542568925965
ebi-a-GCST90017050 uDf6S8 Irritable bowel syndrome_R8 || id:ebi-a-GCST90017050 Weighted mode 15 0.0952131807519696 0.139947046457965 0.507377886339563
ebi-a-GCST90017051 uDf6S8 Irritable bowel syndrome_R8 || id:ebi-a-GCST90017051 MR Egger 8 -0.268541698766721 0.541415098351332 0.637537409026077
ebi-a-GCST90017051 uDf6S8 Irritable bowel syndrome_R8 || id:ebi-a-GCST90017051 Weighted median 8 0.00525290588373292 0.143982229931852 0.97089722159701
ebi-a-GCST90017051 uDf6S8 Irritable bowel syndrome_R8 || id:ebi-a-GCST90017051 Inverse variance weighted 8 0.0285982305405291 0.113055073454722 0.800300359565014
ebi-a-GCST90017051 uDf6S8 Irritable bowel syndrome_R8 || id:ebi-a-GCST90017051 Simple mode 8 -0.0201705520204127 0.229550315263529 0.932441056922448
ebi-a-GCST90017051 uDf6S8 Irritable bowel syndrome_R8 || id:ebi-a-GCST90017051 Weighted mode 8 -0.0510546452899757 0.23048170969013 0.831016457906434
ebi-a-GCST90017052 uDf6S8 Irritable bowel syndrome_R8 || id:ebi-a-GCST90017052 MR Egger 13 0.0405670837239049 0.291044153926943 0.891665449097907
ebi-a-GCST90017052 uDf6S8 Irritable bowel syndrome_R8 || id:ebi-a-GCST90017052 Weighted median 13 -0.0189677731436231 0.115200586211452 0.869219497004863
ebi-a-GCST90017052 uDf6S8 Irritable bowel syndrome_R8 || id:ebi-a-GCST90017052 Inverse variance weighted 13 0.0538819237887249 0.0842985592698914 0.522706067630595
ebi-a-GCST90017052 uDf6S8 Irritable bowel syndrome_R8 || id:ebi-a-GCST90017052 Simple mode 13 -0.0350453626069133 0.193858554877289 0.859559062693414
ebi-a-GCST90017052 uDf6S8 Irritable bowel syndrome_R8 || id:ebi-a-GCST90017052 Weighted mode 13 -0.0496761207454468 0.1643360302351 0.767611022851525
ebi-a-GCST90017053 uDf6S8 Irritable bowel syndrome_R8 || id:ebi-a-GCST90017053 MR Egger 20 -0.166285101354849 0.175189781101378 0.355104354908539
ebi-a-GCST90017053 uDf6S8 Irritable bowel syndrome_R8 || id:ebi-a-GCST90017053 Weighted median 20 -0.12443627451354 0.0924088155473103 0.178114103475196
ebi-a-GCST90017053 uDf6S8 Irritable bowel syndrome_R8 || id:ebi-a-GCST90017053 Inverse variance weighted 20 -0.0953024107339278 0.0659234246469573 0.148274493018666
ebi-a-GCST90017053 uDf6S8 Irritable bowel syndrome_R8 || id:ebi-a-GCST90017053 Simple mode 20 -0.125492271128582 0.172472765889827 0.475726026851148
ebi-a-GCST90017053 uDf6S8 Irritable bowel syndrome_R8 || id:ebi-a-GCST90017053 Weighted mode 20 -0.171775557473208 0.150262755973642 0.267169134465517
ebi-a-GCST90017054 uDf6S8 Irritable bowel syndrome_R8 || id:ebi-a-GCST90017054 MR Egger 12 0.173950317215828 0.282692597140123 0.552079744960256
ebi-a-GCST90017054 uDf6S8 Irritable bowel syndrome_R8 || id:ebi-a-GCST90017054 Weighted median 12 0.0639105510700037 0.11423466218326 0.575842883564442
ebi-a-GCST90017054 uDf6S8 Irritable bowel syndrome_R8 || id:ebi-a-GCST90017054 Inverse variance weighted 12 0.0264136044636589 0.0835498014354828 0.751894700362611
ebi-a-GCST90017054 uDf6S8 Irritable bowel syndrome_R8 || id:ebi-a-GCST90017054 Simple mode 12 0.023874836182628 0.182421494579702 0.898235252544851
ebi-a-GCST90017054 uDf6S8 Irritable bowel syndrome_R8 || id:ebi-a-GCST90017054 Weighted mode 12 0.023874836182628 0.17297977419134 0.892717988019096
ebi-a-GCST90017055 uDf6S8 Irritable bowel syndrome_R8 || id:ebi-a-GCST90017055 MR Egger 11 -0.519538262068233 0.392553944740981 0.21830736318398
ebi-a-GCST90017055 uDf6S8 Irritable bowel syndrome_R8 || id:ebi-a-GCST90017055 Weighted median 11 -0.101108247319423 0.0975281351907488 0.299871726669285
ebi-a-GCST90017055 uDf6S8 Irritable bowel syndrome_R8 || id:ebi-a-GCST90017055 Inverse variance weighted 11 -0.0234445940295509 0.0706945168350478 0.740166832543221
ebi-a-GCST90017055 uDf6S8 Irritable bowel syndrome_R8 || id:ebi-a-GCST90017055 Simple mode 11 -0.145997184376564 0.177184194006489 0.429162396455145
ebi-a-GCST90017055 uDf6S8 Irritable bowel syndrome_R8 || id:ebi-a-GCST90017055 Weighted mode 11 -0.140733187462915 0.167348247737402 0.420024406137937
ebi-a-GCST90017056 uDf6S8 Irritable bowel syndrome_R8 || id:ebi-a-GCST90017056 MR Egger 14 -0.0361120783906069 0.19777196910269 0.858164661049481
ebi-a-GCST90017056 uDf6S8 Irritable bowel syndrome_R8 || id:ebi-a-GCST90017056 Weighted median 14 -0.00389054101211789 0.0976903492841224 0.968232458426474
ebi-a-GCST90017056 uDf6S8 Irritable bowel syndrome_R8 || id:ebi-a-GCST90017056 Inverse variance weighted 14 0.0126947700460869 0.0726711039328102 0.861324794779759
ebi-a-GCST90017056 uDf6S8 Irritable bowel syndrome_R8 || id:ebi-a-GCST90017056 Simple mode 14 -0.0640246170531635 0.153620185482712 0.683644697006246
ebi-a-GCST90017056 uDf6S8 Irritable bowel syndrome_R8 || id:ebi-a-GCST90017056 Weighted mode 14 0.00420141973546162 0.139299542904181 0.976396744965655
ebi-a-GCST90017057 uDf6S8 Irritable bowel syndrome_R8 || id:ebi-a-GCST90017057 MR Egger 11 0.00133480082077765 0.236233336189458 0.995614960522064
ebi-a-GCST90017057 uDf6S8 Irritable bowel syndrome_R8 || id:ebi-a-GCST90017057 Weighted median 11 -0.0302501249009673 0.0827799042898759 0.714791672520259
ebi-a-GCST90017057 uDf6S8 Irritable bowel syndrome_R8 || id:ebi-a-GCST90017057 Inverse variance weighted 11 -0.0171752851019599 0.061481955688968 0.77997248440142
ebi-a-GCST90017057 uDf6S8 Irritable bowel syndrome_R8 || id:ebi-a-GCST90017057 Simple mode 11 -0.129394687757806 0.133415706149643 0.354988503616167
ebi-a-GCST90017057 uDf6S8 Irritable bowel syndrome_R8 || id:ebi-a-GCST90017057 Weighted mode 11 -0.0741663211396627 0.12736361099154 0.573245631223324
ebi-a-GCST90017058 uDf6S8 Irritable bowel syndrome_R8 || id:ebi-a-GCST90017058 MR Egger 6 -0.0138773507548226 0.312536054398621 0.96671187180482
ebi-a-GCST90017058 uDf6S8 Irritable bowel syndrome_R8 || id:ebi-a-GCST90017058 Weighted median 6 -0.145847919117199 0.139477497073864 0.295711813086068
ebi-a-GCST90017058 uDf6S8 Irritable bowel syndrome_R8 || id:ebi-a-GCST90017058 Inverse variance weighted 6 -0.145074016053994 0.104544509910489 0.165235410546425
ebi-a-GCST90017058 uDf6S8 Irritable bowel syndrome_R8 || id:ebi-a-GCST90017058 Simple mode 6 -0.231577492273843 0.196060892109671 0.290659337880752
ebi-a-GCST90017058 uDf6S8 Irritable bowel syndrome_R8 || id:ebi-a-GCST90017058 Weighted mode 6 -0.149135643804238 0.176906259744719 0.437674229307546
ebi-a-GCST90017059 uDf6S8 Irritable bowel syndrome_R8 || id:ebi-a-GCST90017059 MR Egger 8 0.0829582711283322 0.30935928460108 0.797556028184175
ebi-a-GCST90017059 uDf6S8 Irritable bowel syndrome_R8 || id:ebi-a-GCST90017059 Weighted median 8 0.0176325700781104 0.0743660026231298 0.812575135043534
ebi-a-GCST90017059 uDf6S8 Irritable bowel syndrome_R8 || id:ebi-a-GCST90017059 Inverse variance weighted 8 0.0115013453390432 0.0575123516350556 0.841495879372471
ebi-a-GCST90017059 uDf6S8 Irritable bowel syndrome_R8 || id:ebi-a-GCST90017059 Simple mode 8 -0.0100291429234909 0.117420977633408 0.934325578549619
ebi-a-GCST90017059 uDf6S8 Irritable bowel syndrome_R8 || id:ebi-a-GCST90017059 Weighted mode 8 -0.0517594191191858 0.103305958598164 0.631717886185488
ebi-a-GCST90017060 uDf6S8 Irritable bowel syndrome_R8 || id:ebi-a-GCST90017060 MR Egger 11 -0.173450226288368 0.253913576552828 0.511738780333414
ebi-a-GCST90017060 uDf6S8 Irritable bowel syndrome_R8 || id:ebi-a-GCST90017060 Weighted median 11 -0.187650105800631 0.111035478205508 0.0910277002718838
ebi-a-GCST90017060 uDf6S8 Irritable bowel syndrome_R8 || id:ebi-a-GCST90017060 Inverse variance weighted 11 -0.143003795687948 0.0882303751179773 0.10506052952849
ebi-a-GCST90017060 uDf6S8 Irritable bowel syndrome_R8 || id:ebi-a-GCST90017060 Simple mode 11 -0.215777859650286 0.164518834541601 0.218978309922406
ebi-a-GCST90017060 uDf6S8 Irritable bowel syndrome_R8 || id:ebi-a-GCST90017060 Weighted mode 11 -0.209410824889175 0.156576332849121 0.210703312198921
ebi-a-GCST90017061 uDf6S8 Irritable bowel syndrome_R8 || id:ebi-a-GCST90017061 MR Egger 10 -0.0949486464474909 0.185817173429569 0.62316529253044
ebi-a-GCST90017061 uDf6S8 Irritable bowel syndrome_R8 || id:ebi-a-GCST90017061 Weighted median 10 -0.0308049151473628 0.101623686298351 0.761792838643687
ebi-a-GCST90017061 uDf6S8 Irritable bowel syndrome_R8 || id:ebi-a-GCST90017061 Inverse variance weighted 10 -0.010544876293925 0.0803290754099009 0.895560949266095
ebi-a-GCST90017061 uDf6S8 Irritable bowel syndrome_R8 || id:ebi-a-GCST90017061 Simple mode 10 0.0423410111009764 0.157203645192318 0.793742271897588
ebi-a-GCST90017061 uDf6S8 Irritable bowel syndrome_R8 || id:ebi-a-GCST90017061 Weighted mode 10 -0.0899448376113928 0.122315820491019 0.480849476228223
ebi-a-GCST90017062 uDf6S8 Irritable bowel syndrome_R8 || id:ebi-a-GCST90017062 MR Egger 10 0.0249162824869286 0.234255178511599 0.917912497407939
ebi-a-GCST90017062 uDf6S8 Irritable bowel syndrome_R8 || id:ebi-a-GCST90017062 Weighted median 10 0.0317000766011903 0.115144366850178 0.783080210860641
ebi-a-GCST90017062 uDf6S8 Irritable bowel syndrome_R8 || id:ebi-a-GCST90017062 Inverse variance weighted 10 0.0324106253858102 0.0878889278782444 0.712300648046131
ebi-a-GCST90017062 uDf6S8 Irritable bowel syndrome_R8 || id:ebi-a-GCST90017062 Simple mode 10 0.0226413907744395 0.172957312554218 0.89872802573735
ebi-a-GCST90017062 uDf6S8 Irritable bowel syndrome_R8 || id:ebi-a-GCST90017062 Weighted mode 10 0.0315730917532335 0.155478763422379 0.843597052715231
ebi-a-GCST90017063 uDf6S8 Irritable bowel syndrome_R8 || id:ebi-a-GCST90017063 MR Egger 15 0.101565400849751 0.162923176606545 0.543808374514895
ebi-a-GCST90017063 uDf6S8 Irritable bowel syndrome_R8 || id:ebi-a-GCST90017063 Weighted median 15 0.0593842053423837 0.0959378149066702 0.535925299945641
ebi-a-GCST90017063 uDf6S8 Irritable bowel syndrome_R8 || id:ebi-a-GCST90017063 Inverse variance weighted 15 0.099543870094946 0.0675354317862213 0.140494972578812
ebi-a-GCST90017063 uDf6S8 Irritable bowel syndrome_R8 || id:ebi-a-GCST90017063 Simple mode 15 -0.0104312233193052 0.159999497735272 0.948940274049884
ebi-a-GCST90017063 uDf6S8 Irritable bowel syndrome_R8 || id:ebi-a-GCST90017063 Weighted mode 15 0.0166554685853684 0.122797392430585 0.894041743083967
ebi-a-GCST90017064 uDf6S8 Irritable bowel syndrome_R8 || id:ebi-a-GCST90017064 MR Egger 11 -0.258304525624946 0.354005867071274 0.484153721608283
ebi-a-GCST90017064 uDf6S8 Irritable bowel syndrome_R8 || id:ebi-a-GCST90017064 Weighted median 11 -0.080668481730843 0.109638754496608 0.461873038886511
ebi-a-GCST90017064 uDf6S8 Irritable bowel syndrome_R8 || id:ebi-a-GCST90017064 Inverse variance weighted 11 -0.094125117922918 0.0829992392281782 0.2567744309229
ebi-a-GCST90017064 uDf6S8 Irritable bowel syndrome_R8 || id:ebi-a-GCST90017064 Simple mode 11 -0.0147965341851941 0.184951304306752 0.937813813838217
ebi-a-GCST90017064 uDf6S8 Irritable bowel syndrome_R8 || id:ebi-a-GCST90017064 Weighted mode 11 -0.0333650517337891 0.179862768132518 0.856543254926905
ebi-a-GCST90017065 uDf6S8 Irritable bowel syndrome_R8 || id:ebi-a-GCST90017065 MR Egger 11 0.0567312631175862 0.339500971864662 0.870984101434675
ebi-a-GCST90017065 uDf6S8 Irritable bowel syndrome_R8 || id:ebi-a-GCST90017065 Weighted median 11 -0.0983074336584765 0.0797197035049181 0.217514746419339
ebi-a-GCST90017065 uDf6S8 Irritable bowel syndrome_R8 || id:ebi-a-GCST90017065 Inverse variance weighted 11 -0.120454198743018 0.0683740438958305 0.0781208740447084
ebi-a-GCST90017065 uDf6S8 Irritable bowel syndrome_R8 || id:ebi-a-GCST90017065 Simple mode 11 -0.103760121546162 0.123038097108864 0.418766073555428
ebi-a-GCST90017065 uDf6S8 Irritable bowel syndrome_R8 || id:ebi-a-GCST90017065 Weighted mode 11 -0.103760121546162 0.121595214163117 0.413452178118736
ebi-a-GCST90017066 uDf6S8 Irritable bowel syndrome_R8 || id:ebi-a-GCST90017066 MR Egger 8 -0.279708427485064 0.547420302419936 0.627631638595645
ebi-a-GCST90017066 uDf6S8 Irritable bowel syndrome_R8 || id:ebi-a-GCST90017066 Weighted median 8 -0.204701489421664 0.169542037638447 0.227286233766747
ebi-a-GCST90017066 uDf6S8 Irritable bowel syndrome_R8 || id:ebi-a-GCST90017066 Inverse variance weighted 8 -0.0896315503057498 0.160752787892864 0.577135419528306
ebi-a-GCST90017066 uDf6S8 Irritable bowel syndrome_R8 || id:ebi-a-GCST90017066 Simple mode 8 -0.218137565739619 0.253049786202245 0.417218966257502
ebi-a-GCST90017066 uDf6S8 Irritable bowel syndrome_R8 || id:ebi-a-GCST90017066 Weighted mode 8 -0.218137565739619 0.232949161966756 0.380231417992273
ebi-a-GCST90017067 uDf6S8 Irritable bowel syndrome_R8 || id:ebi-a-GCST90017067 MR Egger 9 -0.32308698045547 0.237202668206396 0.21538115204336
ebi-a-GCST90017067 uDf6S8 Irritable bowel syndrome_R8 || id:ebi-a-GCST90017067 Weighted median 9 -0.0111984794839826 0.058998283161847 0.84945781550738
ebi-a-GCST90017067 uDf6S8 Irritable bowel syndrome_R8 || id:ebi-a-GCST90017067 Inverse variance weighted 9 -0.0228407443193662 0.0436881219839496 0.60110397467648
ebi-a-GCST90017067 uDf6S8 Irritable bowel syndrome_R8 || id:ebi-a-GCST90017067 Simple mode 9 -0.0275382206324773 0.0879628839887675 0.762236337875215
ebi-a-GCST90017067 uDf6S8 Irritable bowel syndrome_R8 || id:ebi-a-GCST90017067 Weighted mode 9 0.00101962987290594 0.0853937556524276 0.990765616743964
ebi-a-GCST90017068 uDf6S8 Irritable bowel syndrome_R8 || id:ebi-a-GCST90017068 MR Egger 5 -0.360915337833105 0.405533117537239 0.439040613421788
ebi-a-GCST90017068 uDf6S8 Irritable bowel syndrome_R8 || id:ebi-a-GCST90017068 Weighted median 5 0.010982090638422 0.13056115491167 0.932965369534414
ebi-a-GCST90017068 uDf6S8 Irritable bowel syndrome_R8 || id:ebi-a-GCST90017068 Inverse variance weighted 5 0.0609007686291115 0.107354526390993 0.570519578549121
ebi-a-GCST90017068 uDf6S8 Irritable bowel syndrome_R8 || id:ebi-a-GCST90017068 Simple mode 5 -0.0691228427822349 0.19606110512269 0.742212711242333
ebi-a-GCST90017068 uDf6S8 Irritable bowel syndrome_R8 || id:ebi-a-GCST90017068 Weighted mode 5 -0.074602254088262 0.199426537248471 0.727326981361681
ebi-a-GCST90017069 uDf6S8 Irritable bowel syndrome_R8 || id:ebi-a-GCST90017069 MR Egger 6 0.639058089817009 0.524230209503309 0.289799920357823
ebi-a-GCST90017069 uDf6S8 Irritable bowel syndrome_R8 || id:ebi-a-GCST90017069 Weighted median 6 0.0842230459080399 0.102030953609156 0.409107285082808
ebi-a-GCST90017069 uDf6S8 Irritable bowel syndrome_R8 || id:ebi-a-GCST90017069 Inverse variance weighted 6 0.129994980186032 0.0806299787686596 0.106909445627291
ebi-a-GCST90017069 uDf6S8 Irritable bowel syndrome_R8 || id:ebi-a-GCST90017069 Simple mode 6 0.0791143012302799 0.149849204512931 0.62011017404932
ebi-a-GCST90017069 uDf6S8 Irritable bowel syndrome_R8 || id:ebi-a-GCST90017069 Weighted mode 6 0.0749142416518701 0.14198208818503 0.620321683782806
ebi-a-GCST90017070 uDf6S8 Irritable bowel syndrome_R8 || id:ebi-a-GCST90017070 MR Egger 13 -0.376348314033874 0.479583296846157 0.449176476574783
ebi-a-GCST90017070 uDf6S8 Irritable bowel syndrome_R8 || id:ebi-a-GCST90017070 Weighted median 13 0.0450161507939077 0.13617126167283 0.74095812085189
ebi-a-GCST90017070 uDf6S8 Irritable bowel syndrome_R8 || id:ebi-a-GCST90017070 Inverse variance weighted 13 0.0826799772815187 0.128692020371378 0.520572021611869
ebi-a-GCST90017070 uDf6S8 Irritable bowel syndrome_R8 || id:ebi-a-GCST90017070 Simple mode 13 0.0442648491715103 0.275188781219283 0.874885644268531
ebi-a-GCST90017070 uDf6S8 Irritable bowel syndrome_R8 || id:ebi-a-GCST90017070 Weighted mode 13 0.0250759319310991 0.251887607134263 0.922343727199734
ebi-a-GCST90017071 uDf6S8 Irritable bowel syndrome_R8 || id:ebi-a-GCST90017071 MR Egger 10 -0.0144797011619884 0.274204066886249 0.959181054806848
ebi-a-GCST90017071 uDf6S8 Irritable bowel syndrome_R8 || id:ebi-a-GCST90017071 Weighted median 10 -0.0819881058450541 0.123886751540549 0.508100163188986
ebi-a-GCST90017071 uDf6S8 Irritable bowel syndrome_R8 || id:ebi-a-GCST90017071 Inverse variance weighted 10 -0.0433605246535668 0.101396379780576 0.668917714550748
ebi-a-GCST90017071 uDf6S8 Irritable bowel syndrome_R8 || id:ebi-a-GCST90017071 Simple mode 10 -0.068023772142079 0.187769582762045 0.725509119655572
ebi-a-GCST90017071 uDf6S8 Irritable bowel syndrome_R8 || id:ebi-a-GCST90017071 Weighted mode 10 -0.0858264661392695 0.169090320192119 0.62395394624761
ebi-a-GCST90017072 uDf6S8 Irritable bowel syndrome_R8 || id:ebi-a-GCST90017072 MR Egger 12 0.279191799669335 0.3424585408263 0.433912684426918
ebi-a-GCST90017072 uDf6S8 Irritable bowel syndrome_R8 || id:ebi-a-GCST90017072 Weighted median 12 -0.10286824949556 0.111213073471062 0.354983884458203
ebi-a-GCST90017072 uDf6S8 Irritable bowel syndrome_R8 || id:ebi-a-GCST90017072 Inverse variance weighted 12 -0.116323835695067 0.0795095605864183 0.143462737971393
ebi-a-GCST90017072 uDf6S8 Irritable bowel syndrome_R8 || id:ebi-a-GCST90017072 Simple mode 12 0.0180816130325689 0.194372484391542 0.927555928844641
ebi-a-GCST90017072 uDf6S8 Irritable bowel syndrome_R8 || id:ebi-a-GCST90017072 Weighted mode 12 0.0570195024110204 0.187314960626927 0.766501266380373
ebi-a-GCST90017073 uDf6S8 Irritable bowel syndrome_R8 || id:ebi-a-GCST90017073 MR Egger 5 -0.26713857968884 0.277039130283032 0.406044928936295
ebi-a-GCST90017073 uDf6S8 Irritable bowel syndrome_R8 || id:ebi-a-GCST90017073 Weighted median 5 -0.147476703367115 0.119168235154991 0.215882795856615
ebi-a-GCST90017073 uDf6S8 Irritable bowel syndrome_R8 || id:ebi-a-GCST90017073 Inverse variance weighted 5 -0.161721751192589 0.0918510271904196 0.0782898424410806
ebi-a-GCST90017073 uDf6S8 Irritable bowel syndrome_R8 || id:ebi-a-GCST90017073 Simple mode 5 -0.0644188710232841 0.152322348302888 0.69410554241357
ebi-a-GCST90017073 uDf6S8 Irritable bowel syndrome_R8 || id:ebi-a-GCST90017073 Weighted mode 5 -0.070384179768135 0.164558931098753 0.690880623367233
ebi-a-GCST90017074 uDf6S8 Irritable bowel syndrome_R8 || id:ebi-a-GCST90017074 MR Egger 9 -0.195919483699596 0.461893549998921 0.684175868816815
ebi-a-GCST90017074 uDf6S8 Irritable bowel syndrome_R8 || id:ebi-a-GCST90017074 Weighted median 9 0.0768717643716585 0.113525188763773 0.498320942894334
ebi-a-GCST90017074 uDf6S8 Irritable bowel syndrome_R8 || id:ebi-a-GCST90017074 Inverse variance weighted 9 0.0774691365625161 0.109506572381347 0.479294181638759
ebi-a-GCST90017074 uDf6S8 Irritable bowel syndrome_R8 || id:ebi-a-GCST90017074 Simple mode 9 0.0222109439503055 0.187331520940442 0.908543133759054
ebi-a-GCST90017074 uDf6S8 Irritable bowel syndrome_R8 || id:ebi-a-GCST90017074 Weighted mode 9 0.163817222452367 0.166718467872952 0.354584202703335
ebi-a-GCST90017075 uDf6S8 Irritable bowel syndrome_R8 || id:ebi-a-GCST90017075 MR Egger 12 0.0306198828516211 0.286019162106313 0.916862389504118
ebi-a-GCST90017075 uDf6S8 Irritable bowel syndrome_R8 || id:ebi-a-GCST90017075 Weighted median 12 0.0448659716849366 0.0711926683272238 0.528560503825201
ebi-a-GCST90017075 uDf6S8 Irritable bowel syndrome_R8 || id:ebi-a-GCST90017075 Inverse variance weighted 12 -0.0375726818260767 0.0512468488645352 0.4634543975584
ebi-a-GCST90017075 uDf6S8 Irritable bowel syndrome_R8 || id:ebi-a-GCST90017075 Simple mode 12 0.0676332948829322 0.115524140560621 0.570062518291513
ebi-a-GCST90017075 uDf6S8 Irritable bowel syndrome_R8 || id:ebi-a-GCST90017075 Weighted mode 12 0.0676332948829322 0.104941978402304 0.532471901186574
ebi-a-GCST90017076 uDf6S8 Irritable bowel syndrome_R8 || id:ebi-a-GCST90017076 MR Egger 15 0.0513714224019752 0.204253040465316 0.8053528521122
ebi-a-GCST90017076 uDf6S8 Irritable bowel syndrome_R8 || id:ebi-a-GCST90017076 Weighted median 15 0.0952824580765783 0.0868436620890252 0.272566091619631
ebi-a-GCST90017076 uDf6S8 Irritable bowel syndrome_R8 || id:ebi-a-GCST90017076 Inverse variance weighted 15 0.0218850498176638 0.0719588629276421 0.761026725762462
ebi-a-GCST90017076 uDf6S8 Irritable bowel syndrome_R8 || id:ebi-a-GCST90017076 Simple mode 15 0.0926236814644568 0.131277901993941 0.492039167836006
ebi-a-GCST90017076 uDf6S8 Irritable bowel syndrome_R8 || id:ebi-a-GCST90017076 Weighted mode 15 0.0891686081608483 0.11840547621852 0.463879232043147
ebi-a-GCST90017077 uDf6S8 Irritable bowel syndrome_R8 || id:ebi-a-GCST90017077 MR Egger 9 -0.112612674245742 0.227213422737452 0.63533811432346
ebi-a-GCST90017077 uDf6S8 Irritable bowel syndrome_R8 || id:ebi-a-GCST90017077 Weighted median 9 0.110229737263031 0.0800821371575648 0.168679731530667
ebi-a-GCST90017077 uDf6S8 Irritable bowel syndrome_R8 || id:ebi-a-GCST90017077 Inverse variance weighted 9 0.0877646330614612 0.0754253182296949 0.244587587900429
ebi-a-GCST90017077 uDf6S8 Irritable bowel syndrome_R8 || id:ebi-a-GCST90017077 Simple mode 9 0.0475885467144047 0.116354103974096 0.693271780128532
ebi-a-GCST90017077 uDf6S8 Irritable bowel syndrome_R8 || id:ebi-a-GCST90017077 Weighted mode 9 0.0747535298826735 0.108229014971765 0.509295748535891
ebi-a-GCST90017078 uDf6S8 Irritable bowel syndrome_R8 || id:ebi-a-GCST90017078 MR Egger 12 0.0357679281862583 0.21245952417205 0.869662879469293
ebi-a-GCST90017078 uDf6S8 Irritable bowel syndrome_R8 || id:ebi-a-GCST90017078 Weighted median 12 0.0511470056764351 0.0927712694447021 0.581411749240539
ebi-a-GCST90017078 uDf6S8 Irritable bowel syndrome_R8 || id:ebi-a-GCST90017078 Inverse variance weighted 12 0.0315931989359866 0.0697338320726445 0.650509781581688
ebi-a-GCST90017078 uDf6S8 Irritable bowel syndrome_R8 || id:ebi-a-GCST90017078 Simple mode 12 0.0839129842849734 0.145942453004664 0.57688043280296
ebi-a-GCST90017078 uDf6S8 Irritable bowel syndrome_R8 || id:ebi-a-GCST90017078 Weighted mode 12 0.0665799277700365 0.125319392037604 0.605785092978662
ebi-a-GCST90017079 uDf6S8 Irritable bowel syndrome_R8 || id:ebi-a-GCST90017079 MR Egger 8 0.504844407032201 0.358567923477346 0.208790780566764
ebi-a-GCST90017079 uDf6S8 Irritable bowel syndrome_R8 || id:ebi-a-GCST90017079 Weighted median 8 0.0179346218076485 0.0951124575275206 0.850435898925667
ebi-a-GCST90017079 uDf6S8 Irritable bowel syndrome_R8 || id:ebi-a-GCST90017079 Inverse variance weighted 8 0.0846526187639223 0.0922562355812928 0.358837985711045
ebi-a-GCST90017079 uDf6S8 Irritable bowel syndrome_R8 || id:ebi-a-GCST90017079 Simple mode 8 -0.0138104736683149 0.135452107427286 0.921648916427732
ebi-a-GCST90017079 uDf6S8 Irritable bowel syndrome_R8 || id:ebi-a-GCST90017079 Weighted mode 8 -0.0138104736683149 0.120319597861183 0.911841308907204
ebi-a-GCST90017080 uDf6S8 Irritable bowel syndrome_R8 || id:ebi-a-GCST90017080 MR Egger 12 0.0736629142531808 0.199705478642404 0.719923355573212
ebi-a-GCST90017080 uDf6S8 Irritable bowel syndrome_R8 || id:ebi-a-GCST90017080 Weighted median 12 0.0830016789730922 0.0632324967182148 0.189303354044377
ebi-a-GCST90017080 uDf6S8 Irritable bowel syndrome_R8 || id:ebi-a-GCST90017080 Inverse variance weighted 12 0.0812569601058983 0.0491632606901622 0.098371893633129
ebi-a-GCST90017080 uDf6S8 Irritable bowel syndrome_R8 || id:ebi-a-GCST90017080 Simple mode 12 0.0814433622870309 0.114966472038186 0.493429927359569
ebi-a-GCST90017080 uDf6S8 Irritable bowel syndrome_R8 || id:ebi-a-GCST90017080 Weighted mode 12 0.0832094364385815 0.112281730333305 0.474170382552386
ebi-a-GCST90017081 uDf6S8 Irritable bowel syndrome_R8 || id:ebi-a-GCST90017081 MR Egger 9 0.285439455943745 0.248915855487269 0.289173869220073
ebi-a-GCST90017081 uDf6S8 Irritable bowel syndrome_R8 || id:ebi-a-GCST90017081 Weighted median 9 0.12207255668752 0.105514850143246 0.247303821992564
ebi-a-GCST90017081 uDf6S8 Irritable bowel syndrome_R8 || id:ebi-a-GCST90017081 Inverse variance weighted 9 0.0326817396729824 0.079326841747168 0.680347915757119
ebi-a-GCST90017081 uDf6S8 Irritable bowel syndrome_R8 || id:ebi-a-GCST90017081 Simple mode 9 0.149938828211526 0.181298311846223 0.432195396190238
ebi-a-GCST90017081 uDf6S8 Irritable bowel syndrome_R8 || id:ebi-a-GCST90017081 Weighted mode 9 0.16132974585895 0.170318255209148 0.371253509345377
ebi-a-GCST90017082 uDf6S8 Irritable bowel syndrome_R8 || id:ebi-a-GCST90017082 MR Egger 8 -0.0969843815972476 0.269127223543986 0.73091962362501
ebi-a-GCST90017082 uDf6S8 Irritable bowel syndrome_R8 || id:ebi-a-GCST90017082 Weighted median 8 0.00395215429397669 0.104955976785279 0.969962474339592
ebi-a-GCST90017082 uDf6S8 Irritable bowel syndrome_R8 || id:ebi-a-GCST90017082 Inverse variance weighted 8 0.00494666135667097 0.0953719696485641 0.958634640588728
ebi-a-GCST90017082 uDf6S8 Irritable bowel syndrome_R8 || id:ebi-a-GCST90017082 Simple mode 8 0.0525169072743235 0.194291505352249 0.794725680198537
ebi-a-GCST90017082 uDf6S8 Irritable bowel syndrome_R8 || id:ebi-a-GCST90017082 Weighted mode 8 -0.0484526154481616 0.119591983211766 0.697463632634026
ebi-a-GCST90017083 uDf6S8 Irritable bowel syndrome_R8 || id:ebi-a-GCST90017083 MR Egger 12 -0.100611630025283 0.299452477874888 0.743825161628551
ebi-a-GCST90017083 uDf6S8 Irritable bowel syndrome_R8 || id:ebi-a-GCST90017083 Weighted median 12 -0.174760993872938 0.0904767334745887 0.0534141720648718
ebi-a-GCST90017083 uDf6S8 Irritable bowel syndrome_R8 || id:ebi-a-GCST90017083 Inverse variance weighted 12 -0.0721800702135637 0.0885494076641513 0.414992784830757
ebi-a-GCST90017083 uDf6S8 Irritable bowel syndrome_R8 || id:ebi-a-GCST90017083 Simple mode 12 -0.241512033082981 0.166497796632144 0.174818042927617
ebi-a-GCST90017083 uDf6S8 Irritable bowel syndrome_R8 || id:ebi-a-GCST90017083 Weighted mode 12 -0.237715553176827 0.153096818981987 0.148771443474346
ebi-a-GCST90017084 uDf6S8 Irritable bowel syndrome_R8 || id:ebi-a-GCST90017084 MR Egger 16 0.216171441029771 0.348259087141676 0.544757168186224
ebi-a-GCST90017084 uDf6S8 Irritable bowel syndrome_R8 || id:ebi-a-GCST90017084 Weighted median 16 -0.0512350888782685 0.0956627864991116 0.59224875533753
ebi-a-GCST90017084 uDf6S8 Irritable bowel syndrome_R8 || id:ebi-a-GCST90017084 Inverse variance weighted 16 -0.0516602403665942 0.0712585734196526 0.468471189328062
ebi-a-GCST90017084 uDf6S8 Irritable bowel syndrome_R8 || id:ebi-a-GCST90017084 Simple mode 16 -0.174551479236263 0.162511709376208 0.299759546590319
ebi-a-GCST90017084 uDf6S8 Irritable bowel syndrome_R8 || id:ebi-a-GCST90017084 Weighted mode 16 -0.123550864134595 0.1517526253577 0.42828991180008
ebi-a-GCST90017085 uDf6S8 Irritable bowel syndrome_R8 || id:ebi-a-GCST90017085 MR Egger 12 0.158410415788614 0.213205528949721 0.474578155100734
ebi-a-GCST90017085 uDf6S8 Irritable bowel syndrome_R8 || id:ebi-a-GCST90017085 Weighted median 12 0.0475738175164006 0.0765892407798352 0.534497406763429
ebi-a-GCST90017085 uDf6S8 Irritable bowel syndrome_R8 || id:ebi-a-GCST90017085 Inverse variance weighted 12 -0.00609152064398518 0.0595963666116516 0.918587646270971
ebi-a-GCST90017085 uDf6S8 Irritable bowel syndrome_R8 || id:ebi-a-GCST90017085 Simple mode 12 0.0680425138843462 0.116901649222182 0.57226959675605
ebi-a-GCST90017085 uDf6S8 Irritable bowel syndrome_R8 || id:ebi-a-GCST90017085 Weighted mode 12 0.0564177396459385 0.112397777715092 0.625599775534183
ebi-a-GCST90017086 uDf6S8 Irritable bowel syndrome_R8 || id:ebi-a-GCST90017086 MR Egger 14 -0.0236557863941615 0.192850909719222 0.90440389036867
ebi-a-GCST90017086 uDf6S8 Irritable bowel syndrome_R8 || id:ebi-a-GCST90017086 Weighted median 14 0.081891280605834 0.0939790011284043 0.383547523595964
ebi-a-GCST90017086 uDf6S8 Irritable bowel syndrome_R8 || id:ebi-a-GCST90017086 Inverse variance weighted 14 0.112153371462339 0.0690757508400908 0.104455076623496
ebi-a-GCST90017086 uDf6S8 Irritable bowel syndrome_R8 || id:ebi-a-GCST90017086 Simple mode 14 0.0352306808245548 0.15436630725919 0.823019812090182
ebi-a-GCST90017086 uDf6S8 Irritable bowel syndrome_R8 || id:ebi-a-GCST90017086 Weighted mode 14 0.0614378959785784 0.133008205128011 0.651780247536533
ebi-a-GCST90017087 uDf6S8 Irritable bowel syndrome_R8 || id:ebi-a-GCST90017087 MR Egger 12 -0.29453386919787 0.252189505285259 0.269935226226731
ebi-a-GCST90017087 uDf6S8 Irritable bowel syndrome_R8 || id:ebi-a-GCST90017087 Weighted median 12 -0.0436474293093937 0.0632830607633068 0.490371909761374
ebi-a-GCST90017087 uDf6S8 Irritable bowel syndrome_R8 || id:ebi-a-GCST90017087 Inverse variance weighted 12 -0.0488019322195879 0.0482883583277341 0.31219088799975
ebi-a-GCST90017087 uDf6S8 Irritable bowel syndrome_R8 || id:ebi-a-GCST90017087 Simple mode 12 -0.0428501748270566 0.103914722425314 0.68799853725467
ebi-a-GCST90017087 uDf6S8 Irritable bowel syndrome_R8 || id:ebi-a-GCST90017087 Weighted mode 12 -0.0613260963113033 0.10189387327193 0.559466334809154
ebi-a-GCST90017088 uDf6S8 Irritable bowel syndrome_R8 || id:ebi-a-GCST90017088 MR Egger 5 -2.59739855062666 2.42021817739067 0.361824619699564
ebi-a-GCST90017088 uDf6S8 Irritable bowel syndrome_R8 || id:ebi-a-GCST90017088 Weighted median 5 -0.128638174732943 0.135696819448308 0.343138496080715
ebi-a-GCST90017088 uDf6S8 Irritable bowel syndrome_R8 || id:ebi-a-GCST90017088 Inverse variance weighted 5 -0.10248555223341 0.104455171277071 0.326521793315229
ebi-a-GCST90017088 uDf6S8 Irritable bowel syndrome_R8 || id:ebi-a-GCST90017088 Simple mode 5 -0.179558030865425 0.180590433815954 0.376362361137206
ebi-a-GCST90017088 uDf6S8 Irritable bowel syndrome_R8 || id:ebi-a-GCST90017088 Weighted mode 5 -0.173067548336744 0.175140604306051 0.379012804383984
ebi-a-GCST90017089 uDf6S8 Irritable bowel syndrome_R8 || id:ebi-a-GCST90017089 MR Egger 11 -0.0986138210727462 0.388376799624809 0.805268668336008
ebi-a-GCST90017089 uDf6S8 Irritable bowel syndrome_R8 || id:ebi-a-GCST90017089 Weighted median 11 -0.136382833632085 0.0572752304182345 0.017257113136501
ebi-a-GCST90017089 uDf6S8 Irritable bowel syndrome_R8 || id:ebi-a-GCST90017089 Inverse variance weighted 11 -0.0581217089476418 0.0566485011364735 0.304888698568429
ebi-a-GCST90017089 uDf6S8 Irritable bowel syndrome_R8 || id:ebi-a-GCST90017089 Simple mode 11 -0.156952063617796 0.0773735529944676 0.0699800572488268
ebi-a-GCST90017089 uDf6S8 Irritable bowel syndrome_R8 || id:ebi-a-GCST90017089 Weighted mode 11 -0.155507066627182 0.079687572974746 0.079555555133889
ebi-a-GCST90017090 uDf6S8 Irritable bowel syndrome_R8 || id:ebi-a-GCST90017090 MR Egger 4 0.162975649854758 0.212262330032334 0.522866356516993
ebi-a-GCST90017090 uDf6S8 Irritable bowel syndrome_R8 || id:ebi-a-GCST90017090 Weighted median 4 0.129906443721119 0.114603300919753 0.256991149553396
ebi-a-GCST90017090 uDf6S8 Irritable bowel syndrome_R8 || id:ebi-a-GCST90017090 Inverse variance weighted 4 0.10712237519 0.0971493460763027 0.270176286887939
ebi-a-GCST90017090 uDf6S8 Irritable bowel syndrome_R8 || id:ebi-a-GCST90017090 Simple mode 4 0.127698827426381 0.146049129982319 0.446280990684789
ebi-a-GCST90017090 uDf6S8 Irritable bowel syndrome_R8 || id:ebi-a-GCST90017090 Weighted mode 4 0.133463089669808 0.133726075897507 0.391816203006426
ebi-a-GCST90017091 uDf6S8 Irritable bowel syndrome_R8 || id:ebi-a-GCST90017091 MR Egger 8 0.00591516357554986 0.20664008714597 0.978091701970703
ebi-a-GCST90017091 uDf6S8 Irritable bowel syndrome_R8 || id:ebi-a-GCST90017091 Weighted median 8 -0.0101096519195019 0.066322591058405 0.878846615376228
ebi-a-GCST90017091 uDf6S8 Irritable bowel syndrome_R8 || id:ebi-a-GCST90017091 Inverse variance weighted 8 -0.0249061707487817 0.0481309849184373 0.604830571032436
ebi-a-GCST90017091 uDf6S8 Irritable bowel syndrome_R8 || id:ebi-a-GCST90017091 Simple mode 8 0.0295398262000403 0.10489113865766 0.786375699812965
ebi-a-GCST90017091 uDf6S8 Irritable bowel syndrome_R8 || id:ebi-a-GCST90017091 Weighted mode 8 0.0261557549145695 0.10460155225128 0.809727460157863
ebi-a-GCST90017092 uDf6S8 Irritable bowel syndrome_R8 || id:ebi-a-GCST90017092 MR Egger 13 -0.160472491208372 0.184416747713395 0.402801393129191
ebi-a-GCST90017092 uDf6S8 Irritable bowel syndrome_R8 || id:ebi-a-GCST90017092 Weighted median 13 -0.096447519991944 0.124305361202261 0.437812829347208
ebi-a-GCST90017092 uDf6S8 Irritable bowel syndrome_R8 || id:ebi-a-GCST90017092 Inverse variance weighted 13 0.0463165826799466 0.0943234524652524 0.623398197349929
ebi-a-GCST90017092 uDf6S8 Irritable bowel syndrome_R8 || id:ebi-a-GCST90017092 Simple mode 13 -0.0882956226987267 0.181096215296714 0.63464594728513
ebi-a-GCST90017092 uDf6S8 Irritable bowel syndrome_R8 || id:ebi-a-GCST90017092 Weighted mode 13 -0.123330247845793 0.150001334704629 0.427001672031244
ebi-a-GCST90017093 uDf6S8 Irritable bowel syndrome_R8 || id:ebi-a-GCST90017093 MR Egger 14 -0.600552272108766 0.266023311077947 0.0434048394787576
ebi-a-GCST90017093 uDf6S8 Irritable bowel syndrome_R8 || id:ebi-a-GCST90017093 Weighted median 14 -0.083365283506121 0.108990433033062 0.444339282871993
ebi-a-GCST90017093 uDf6S8 Irritable bowel syndrome_R8 || id:ebi-a-GCST90017093 Inverse variance weighted 14 -0.107774678318605 0.0826721979574222 0.192356792306408
ebi-a-GCST90017093 uDf6S8 Irritable bowel syndrome_R8 || id:ebi-a-GCST90017093 Simple mode 14 0.0447661538200476 0.1971339944259 0.823889780408271
ebi-a-GCST90017093 uDf6S8 Irritable bowel syndrome_R8 || id:ebi-a-GCST90017093 Weighted mode 14 -0.381188128587439 0.162067243008173 0.0350925805979786
ebi-a-GCST90017094 uDf6S8 Irritable bowel syndrome_R8 || id:ebi-a-GCST90017094 MR Egger 10 -0.136437632976798 0.436246919042538 0.762465617456059
ebi-a-GCST90017094 uDf6S8 Irritable bowel syndrome_R8 || id:ebi-a-GCST90017094 Weighted median 10 -0.144867839597883 0.139974403329197 0.300687821790965
ebi-a-GCST90017094 uDf6S8 Irritable bowel syndrome_R8 || id:ebi-a-GCST90017094 Inverse variance weighted 10 -0.248195418874876 0.131220074159006 0.0585651028544556
ebi-a-GCST90017094 uDf6S8 Irritable bowel syndrome_R8 || id:ebi-a-GCST90017094 Simple mode 10 -0.193780009244648 0.238692823454582 0.437828417305674
ebi-a-GCST90017094 uDf6S8 Irritable bowel syndrome_R8 || id:ebi-a-GCST90017094 Weighted mode 10 -0.183853733159811 0.248904645263262 0.478937686127127
ebi-a-GCST90017095 uDf6S8 Irritable bowel syndrome_R8 || id:ebi-a-GCST90017095 MR Egger 12 -0.285237436279893 0.228158865791233 0.2397009794259
ebi-a-GCST90017095 uDf6S8 Irritable bowel syndrome_R8 || id:ebi-a-GCST90017095 Weighted median 12 0.0198735319598064 0.11930039929024 0.867697421888898
ebi-a-GCST90017095 uDf6S8 Irritable bowel syndrome_R8 || id:ebi-a-GCST90017095 Inverse variance weighted 12 -0.0189528644255944 0.0866534863702728 0.826868043583747
ebi-a-GCST90017095 uDf6S8 Irritable bowel syndrome_R8 || id:ebi-a-GCST90017095 Simple mode 12 0.108763772904364 0.196969015407369 0.591862363678955
ebi-a-GCST90017095 uDf6S8 Irritable bowel syndrome_R8 || id:ebi-a-GCST90017095 Weighted mode 12 0.105750725417169 0.200287088575499 0.607988829847985
ebi-a-GCST90017096 uDf6S8 Irritable bowel syndrome_R8 || id:ebi-a-GCST90017096 MR Egger 18 0.357562839844443 0.309100528469144 0.264340006591704
ebi-a-GCST90017096 uDf6S8 Irritable bowel syndrome_R8 || id:ebi-a-GCST90017096 Weighted median 18 0.0121502563793913 0.101109533760215 0.904349079776479
ebi-a-GCST90017096 uDf6S8 Irritable bowel syndrome_R8 || id:ebi-a-GCST90017096 Inverse variance weighted 18 -0.00710662108424573 0.0750388614562878 0.924548450840757
ebi-a-GCST90017096 uDf6S8 Irritable bowel syndrome_R8 || id:ebi-a-GCST90017096 Simple mode 18 -0.210409586318463 0.182367510598618 0.264559307055503
ebi-a-GCST90017096 uDf6S8 Irritable bowel syndrome_R8 || id:ebi-a-GCST90017096 Weighted mode 18 -0.207625975711028 0.183172007785685 0.272736053414663
ebi-a-GCST90017097 uDf6S8 Irritable bowel syndrome_R8 || id:ebi-a-GCST90017097 MR Egger 11 0.433571606322318 0.423853948065763 0.333050126857351
ebi-a-GCST90017097 uDf6S8 Irritable bowel syndrome_R8 || id:ebi-a-GCST90017097 Weighted median 11 0.0177253418265809 0.127110892051269 0.889096255291061
ebi-a-GCST90017097 uDf6S8 Irritable bowel syndrome_R8 || id:ebi-a-GCST90017097 Inverse variance weighted 11 0.0406715104850761 0.098496330447083 0.679662209375175
ebi-a-GCST90017097 uDf6S8 Irritable bowel syndrome_R8 || id:ebi-a-GCST90017097 Simple mode 11 0.115901440226356 0.218161868101488 0.606834124305189
ebi-a-GCST90017097 uDf6S8 Irritable bowel syndrome_R8 || id:ebi-a-GCST90017097 Weighted mode 11 0.0435376462719643 0.207929361399029 0.838350388641986
ebi-a-GCST90017098 uDf6S8 Irritable bowel syndrome_R8 || id:ebi-a-GCST90017098 MR Egger 7 -0.519106148140952 0.660965719969075 0.46779830936978
ebi-a-GCST90017098 uDf6S8 Irritable bowel syndrome_R8 || id:ebi-a-GCST90017098 Weighted median 7 0.0471755621985515 0.132107440915711 0.721016972542357
ebi-a-GCST90017098 uDf6S8 Irritable bowel syndrome_R8 || id:ebi-a-GCST90017098 Inverse variance weighted 7 -0.044462846877275 0.110501615870467 0.687409669466555
ebi-a-GCST90017098 uDf6S8 Irritable bowel syndrome_R8 || id:ebi-a-GCST90017098 Simple mode 7 0.0628263072643906 0.196623415159005 0.760160262647104
ebi-a-GCST90017098 uDf6S8 Irritable bowel syndrome_R8 || id:ebi-a-GCST90017098 Weighted mode 7 0.0615047201591415 0.194031089577563 0.761995510452671
ebi-a-GCST90017099 uDf6S8 Irritable bowel syndrome_R8 || id:ebi-a-GCST90017099 MR Egger 13 0.158082919524912 0.420787488479685 0.714296258880057
ebi-a-GCST90017099 uDf6S8 Irritable bowel syndrome_R8 || id:ebi-a-GCST90017099 Weighted median 13 -0.0167230887831046 0.128073393593933 0.89611210474014
ebi-a-GCST90017099 uDf6S8 Irritable bowel syndrome_R8 || id:ebi-a-GCST90017099 Inverse variance weighted 13 -0.089960789304941 0.0946065315174068 0.341658155065944
ebi-a-GCST90017099 uDf6S8 Irritable bowel syndrome_R8 || id:ebi-a-GCST90017099 Simple mode 13 0.124458360719411 0.250283440787879 0.627984833770039
ebi-a-GCST90017099 uDf6S8 Irritable bowel syndrome_R8 || id:ebi-a-GCST90017099 Weighted mode 13 0.111697675126595 0.235455009495159 0.643737187254517
ebi-a-GCST90017100 uDf6S8 Irritable bowel syndrome_R8 || id:ebi-a-GCST90017100 MR Egger 9 -0.112612674245742 0.227213422737452 0.63533811432346
ebi-a-GCST90017100 uDf6S8 Irritable bowel syndrome_R8 || id:ebi-a-GCST90017100 Weighted median 9 0.110229737263031 0.0865332458935296 0.202719194773856
ebi-a-GCST90017100 uDf6S8 Irritable bowel syndrome_R8 || id:ebi-a-GCST90017100 Inverse variance weighted 9 0.0877646330614612 0.0754253182296949 0.244587587900429
ebi-a-GCST90017100 uDf6S8 Irritable bowel syndrome_R8 || id:ebi-a-GCST90017100 Simple mode 9 0.0475885467144047 0.113051674271601 0.684876070394338
ebi-a-GCST90017100 uDf6S8 Irritable bowel syndrome_R8 || id:ebi-a-GCST90017100 Weighted mode 9 0.0747535298826735 0.103859398441858 0.492163554056696
ebi-a-GCST90017101 uDf6S8 Irritable bowel syndrome_R8 || id:ebi-a-GCST90017101 MR Egger 15 -0.148127533196302 0.281770361835615 0.607945786921215
ebi-a-GCST90017101 uDf6S8 Irritable bowel syndrome_R8 || id:ebi-a-GCST90017101 Weighted median 15 -0.136315950863491 0.123521723429752 0.269775907321313
ebi-a-GCST90017101 uDf6S8 Irritable bowel syndrome_R8 || id:ebi-a-GCST90017101 Inverse variance weighted 15 0.0480633792927126 0.107145081048559 0.653733055691088
ebi-a-GCST90017101 uDf6S8 Irritable bowel syndrome_R8 || id:ebi-a-GCST90017101 Simple mode 15 -0.241486295434049 0.292693925755075 0.42318057335947
ebi-a-GCST90017101 uDf6S8 Irritable bowel syndrome_R8 || id:ebi-a-GCST90017101 Weighted mode 15 -0.206478059364637 0.203080117813261 0.326530724971484
ebi-a-GCST90017102 uDf6S8 Irritable bowel syndrome_R8 || id:ebi-a-GCST90017102 MR Egger 9 -0.248906234690882 0.200909705085821 0.255311717562041
ebi-a-GCST90017102 uDf6S8 Irritable bowel syndrome_R8 || id:ebi-a-GCST90017102 Weighted median 9 0.0404645756869728 0.0696978763689752 0.561529526267943
ebi-a-GCST90017102 uDf6S8 Irritable bowel syndrome_R8 || id:ebi-a-GCST90017102 Inverse variance weighted 9 0.0129277694908227 0.0519000888233277 0.803291516806253
ebi-a-GCST90017102 uDf6S8 Irritable bowel syndrome_R8 || id:ebi-a-GCST90017102 Simple mode 9 0.0444035773910018 0.103151352254801 0.678215809072391
ebi-a-GCST90017102 uDf6S8 Irritable bowel syndrome_R8 || id:ebi-a-GCST90017102 Weighted mode 9 0.0382070604775883 0.0994292321725978 0.710795448806766
ebi-a-GCST90017103 uDf6S8 Irritable bowel syndrome_R8 || id:ebi-a-GCST90017103 MR Egger 12 0.0357679281862583 0.21245952417205 0.869662879469293
ebi-a-GCST90017103 uDf6S8 Irritable bowel syndrome_R8 || id:ebi-a-GCST90017103 Weighted median 12 0.0511470056764351 0.0920486602135081 0.578448898380067
ebi-a-GCST90017103 uDf6S8 Irritable bowel syndrome_R8 || id:ebi-a-GCST90017103 Inverse variance weighted 12 0.0315931989359866 0.0697338320726445 0.650509781581688
ebi-a-GCST90017103 uDf6S8 Irritable bowel syndrome_R8 || id:ebi-a-GCST90017103 Simple mode 12 0.0839129842849734 0.139189624053735 0.558820734468547
ebi-a-GCST90017103 uDf6S8 Irritable bowel syndrome_R8 || id:ebi-a-GCST90017103 Weighted mode 12 0.0665799277700365 0.139781478227694 0.643170981347254
ebi-a-GCST90017104 uDf6S8 Irritable bowel syndrome_R8 || id:ebi-a-GCST90017104 MR Egger 12 0.0736629142531808 0.199705478642404 0.719923355573212
ebi-a-GCST90017104 uDf6S8 Irritable bowel syndrome_R8 || id:ebi-a-GCST90017104 Weighted median 12 0.0830016789730922 0.0659877646705549 0.208451659749962
ebi-a-GCST90017104 uDf6S8 Irritable bowel syndrome_R8 || id:ebi-a-GCST90017104 Inverse variance weighted 12 0.0812569601058983 0.0491632606901622 0.098371893633129
ebi-a-GCST90017104 uDf6S8 Irritable bowel syndrome_R8 || id:ebi-a-GCST90017104 Simple mode 12 0.0814433622870309 0.108656355899329 0.469253068676869
ebi-a-GCST90017104 uDf6S8 Irritable bowel syndrome_R8 || id:ebi-a-GCST90017104 Weighted mode 12 0.0832094364385815 0.112591999392054 0.475360430755771
ebi-a-GCST90017105 uDf6S8 Irritable bowel syndrome_R8 || id:ebi-a-GCST90017105 MR Egger 13 0.240366036814536 0.119913403496424 0.0702604094987495
ebi-a-GCST90017105 uDf6S8 Irritable bowel syndrome_R8 || id:ebi-a-GCST90017105 Weighted median 13 -0.00681154176661719 0.0829665799850191 0.934567331624319
ebi-a-GCST90017105 uDf6S8 Irritable bowel syndrome_R8 || id:ebi-a-GCST90017105 Inverse variance weighted 13 0.0392280179901754 0.055982497480224 0.483478191837225
ebi-a-GCST90017105 uDf6S8 Irritable bowel syndrome_R8 || id:ebi-a-GCST90017105 Simple mode 13 -0.140370175725557 0.167438819060701 0.418227542662948
ebi-a-GCST90017105 uDf6S8 Irritable bowel syndrome_R8 || id:ebi-a-GCST90017105 Weighted mode 13 0.200810250114595 0.121168302493557 0.123354611346864
ebi-a-GCST90017106 uDf6S8 Irritable bowel syndrome_R8 || id:ebi-a-GCST90017106 MR Egger 13 0.114949725916032 0.231811649457776 0.62974050490766
ebi-a-GCST90017106 uDf6S8 Irritable bowel syndrome_R8 || id:ebi-a-GCST90017106 Weighted median 13 0.0251742873648966 0.0815973962743111 0.757688001949677
ebi-a-GCST90017106 uDf6S8 Irritable bowel syndrome_R8 || id:ebi-a-GCST90017106 Inverse variance weighted 13 -0.00209525799092916 0.0592011825479906 0.97176703262797
ebi-a-GCST90017106 uDf6S8 Irritable bowel syndrome_R8 || id:ebi-a-GCST90017106 Simple mode 13 0.0419979994577894 0.120457768560892 0.733390322201898
ebi-a-GCST90017106 uDf6S8 Irritable bowel syndrome_R8 || id:ebi-a-GCST90017106 Weighted mode 13 0.0376987778543172 0.11329006396407 0.745054274595941
ebi-a-GCST90017107 uDf6S8 Irritable bowel syndrome_R8 || id:ebi-a-GCST90017107 MR Egger 12 -0.161194807724445 0.334174029479196 0.639928926065661
ebi-a-GCST90017107 uDf6S8 Irritable bowel syndrome_R8 || id:ebi-a-GCST90017107 Weighted median 12 0.132303360576982 0.131149381674942 0.313071057251651
ebi-a-GCST90017107 uDf6S8 Irritable bowel syndrome_R8 || id:ebi-a-GCST90017107 Inverse variance weighted 12 0.0351052757950451 0.09443457019935 0.710085110190389
ebi-a-GCST90017107 uDf6S8 Irritable bowel syndrome_R8 || id:ebi-a-GCST90017107 Simple mode 12 0.278487490255986 0.260579447915933 0.308086109322901
ebi-a-GCST90017107 uDf6S8 Irritable bowel syndrome_R8 || id:ebi-a-GCST90017107 Weighted mode 12 0.285834591469519 0.260633722564745 0.296204891005212
ebi-a-GCST90017108 uDf6S8 Irritable bowel syndrome_R8 || id:ebi-a-GCST90017108 MR Egger 12 -0.310713436636855 0.333130448478606 0.372942769032606
ebi-a-GCST90017108 uDf6S8 Irritable bowel syndrome_R8 || id:ebi-a-GCST90017108 Weighted median 12 -0.135603399958016 0.109839779740924 0.216995654586167
ebi-a-GCST90017108 uDf6S8 Irritable bowel syndrome_R8 || id:ebi-a-GCST90017108 Inverse variance weighted 12 -0.0566101565210153 0.0939055819932894 0.546614315866236
ebi-a-GCST90017108 uDf6S8 Irritable bowel syndrome_R8 || id:ebi-a-GCST90017108 Simple mode 12 -0.190015676685274 0.235383672334043 0.436624838188844
ebi-a-GCST90017108 uDf6S8 Irritable bowel syndrome_R8 || id:ebi-a-GCST90017108 Weighted mode 12 -0.197944672152269 0.222500779767748 0.392702078683952
ebi-a-GCST90017109 uDf6S8 Irritable bowel syndrome_R8 || id:ebi-a-GCST90017109 MR Egger 8 0.0687789398659038 0.245245569944396 0.788551731692387
ebi-a-GCST90017109 uDf6S8 Irritable bowel syndrome_R8 || id:ebi-a-GCST90017109 Weighted median 8 0.0442077722137443 0.0797072551735792 0.579150019766296
ebi-a-GCST90017109 uDf6S8 Irritable bowel syndrome_R8 || id:ebi-a-GCST90017109 Inverse variance weighted 8 0.0365990593449033 0.0637672677603842 0.566003376961007
ebi-a-GCST90017109 uDf6S8 Irritable bowel syndrome_R8 || id:ebi-a-GCST90017109 Simple mode 8 0.0811825138744892 0.137893468474634 0.574537691856834
ebi-a-GCST90017109 uDf6S8 Irritable bowel syndrome_R8 || id:ebi-a-GCST90017109 Weighted mode 8 0.0965467397841766 0.134415261392834 0.495857720779244
ebi-a-GCST90017110 uDf6S8 Irritable bowel syndrome_R8 || id:ebi-a-GCST90017110 MR Egger 14 -0.71613764334793 0.3726440933985 0.0786979236413902
ebi-a-GCST90017110 uDf6S8 Irritable bowel syndrome_R8 || id:ebi-a-GCST90017110 Weighted median 14 -0.0350125741179269 0.124994182229367 0.779390327880152
ebi-a-GCST90017110 uDf6S8 Irritable bowel syndrome_R8 || id:ebi-a-GCST90017110 Inverse variance weighted 14 -0.097888716746168 0.0964418772994748 0.310104783177682
ebi-a-GCST90017110 uDf6S8 Irritable bowel syndrome_R8 || id:ebi-a-GCST90017110 Simple mode 14 -0.0563994738745081 0.241584814529955 0.819043045159568
ebi-a-GCST90017110 uDf6S8 Irritable bowel syndrome_R8 || id:ebi-a-GCST90017110 Weighted mode 14 -0.0443615563158063 0.279094580245112 0.876152532742325
ebi-a-GCST90017111 uDf6S8 Irritable bowel syndrome_R8 || id:ebi-a-GCST90017111 MR Egger 10 -0.196396676240484 0.260720867618436 0.472863284718623
ebi-a-GCST90017111 uDf6S8 Irritable bowel syndrome_R8 || id:ebi-a-GCST90017111 Weighted median 10 0.0880686206345881 0.147680293494818 0.550943797860461
ebi-a-GCST90017111 uDf6S8 Irritable bowel syndrome_R8 || id:ebi-a-GCST90017111 Inverse variance weighted 10 0.10089554640063 0.122288833001637 0.409337890375749
ebi-a-GCST90017111 uDf6S8 Irritable bowel syndrome_R8 || id:ebi-a-GCST90017111 Simple mode 10 0.205491928600254 0.234389326359144 0.403437072860362
ebi-a-GCST90017111 uDf6S8 Irritable bowel syndrome_R8 || id:ebi-a-GCST90017111 Weighted mode 10 -0.0404543776363493 0.204991442608764 0.847941245321224
ebi-a-GCST90017112 uDf6S8 Irritable bowel syndrome_R8 || id:ebi-a-GCST90017112 MR Egger 8 0.16820570201551 0.349741438157889 0.647592218593441
ebi-a-GCST90017112 uDf6S8 Irritable bowel syndrome_R8 || id:ebi-a-GCST90017112 Weighted median 8 0.00596717021243831 0.0969988422193214 0.950946717092969
ebi-a-GCST90017112 uDf6S8 Irritable bowel syndrome_R8 || id:ebi-a-GCST90017112 Inverse variance weighted 8 -0.0189839127409296 0.0932871620498053 0.838744452913675
ebi-a-GCST90017112 uDf6S8 Irritable bowel syndrome_R8 || id:ebi-a-GCST90017112 Simple mode 8 -0.0414063375378815 0.149526565348251 0.789843175407389
ebi-a-GCST90017112 uDf6S8 Irritable bowel syndrome_R8 || id:ebi-a-GCST90017112 Weighted mode 8 -0.0110717818510613 0.133722827050448 0.936331234622921
ebi-a-GCST90017113 uDf6S8 Irritable bowel syndrome_R8 || id:ebi-a-GCST90017113 MR Egger 11 0.145761197969559 0.198777703226541 0.482045599112992
ebi-a-GCST90017113 uDf6S8 Irritable bowel syndrome_R8 || id:ebi-a-GCST90017113 Weighted median 11 0.0609599869550739 0.0602952871155203 0.312004906623037
ebi-a-GCST90017113 uDf6S8 Irritable bowel syndrome_R8 || id:ebi-a-GCST90017113 Inverse variance weighted 11 0.0359120349544204 0.044892306931791 0.423734165152065
ebi-a-GCST90017113 uDf6S8 Irritable bowel syndrome_R8 || id:ebi-a-GCST90017113 Simple mode 11 0.0546903849989974 0.0967696479779463 0.584420138390756
ebi-a-GCST90017113 uDf6S8 Irritable bowel syndrome_R8 || id:ebi-a-GCST90017113 Weighted mode 11 0.0561892485860075 0.091067988026812 0.551021294002296
ebi-a-GCST90017114 uDf6S8 Irritable bowel syndrome_R8 || id:ebi-a-GCST90017114 MR Egger 15 -0.126584108978765 0.197144726157605 0.531976458831094
ebi-a-GCST90017114 uDf6S8 Irritable bowel syndrome_R8 || id:ebi-a-GCST90017114 Weighted median 15 -0.0299269740448642 0.106459727199042 0.778625454121603
ebi-a-GCST90017114 uDf6S8 Irritable bowel syndrome_R8 || id:ebi-a-GCST90017114 Inverse variance weighted 15 -0.0900008770151895 0.0817657841834227 0.271020439559898
ebi-a-GCST90017114 uDf6S8 Irritable bowel syndrome_R8 || id:ebi-a-GCST90017114 Simple mode 15 0.0191756846060602 0.164623137857557 0.908924735556849
ebi-a-GCST90017114 uDf6S8 Irritable bowel syndrome_R8 || id:ebi-a-GCST90017114 Weighted mode 15 -0.0168156179841357 0.130567730444179 0.899356903579436
ebi-a-GCST90017115 uDf6S8 Irritable bowel syndrome_R8 || id:ebi-a-GCST90017115 MR Egger 9 0.0214120543729241 0.235078931890954 0.929977101026103
ebi-a-GCST90017115 uDf6S8 Irritable bowel syndrome_R8 || id:ebi-a-GCST90017115 Weighted median 9 -0.0307648057528247 0.0796595415410318 0.699345850264348
ebi-a-GCST90017115 uDf6S8 Irritable bowel syndrome_R8 || id:ebi-a-GCST90017115 Inverse variance weighted 9 0.0207973307005679 0.0576067724904671 0.718082761156106
ebi-a-GCST90017115 uDf6S8 Irritable bowel syndrome_R8 || id:ebi-a-GCST90017115 Simple mode 9 -0.0750978481350693 0.121753253686448 0.554507566709856
ebi-a-GCST90017115 uDf6S8 Irritable bowel syndrome_R8 || id:ebi-a-GCST90017115 Weighted mode 9 -0.0796643452516175 0.127783249201312 0.550356611140614
ebi-a-GCST90017116 uDf6S8 Irritable bowel syndrome_R8 || id:ebi-a-GCST90017116 MR Egger 12 0.228309129109677 0.245414909451054 0.37412926695198
ebi-a-GCST90017116 uDf6S8 Irritable bowel syndrome_R8 || id:ebi-a-GCST90017116 Weighted median 12 -0.09621762414603 0.11905644364001 0.418993798071005
ebi-a-GCST90017116 uDf6S8 Irritable bowel syndrome_R8 || id:ebi-a-GCST90017116 Inverse variance weighted 12 -0.0763350322311468 0.0881415278442043 0.386462356916136
ebi-a-GCST90017116 uDf6S8 Irritable bowel syndrome_R8 || id:ebi-a-GCST90017116 Simple mode 12 -0.11137035246709 0.187320966857776 0.564177699390096
ebi-a-GCST90017116 uDf6S8 Irritable bowel syndrome_R8 || id:ebi-a-GCST90017116 Weighted mode 12 -0.0774555240568229 0.1694228676303 0.656443537132404
ebi-a-GCST90017117 uDf6S8 Irritable bowel syndrome_R8 || id:ebi-a-GCST90017117 MR Egger 12 0.121372235820735 0.247567868193096 0.634529150098296
ebi-a-GCST90017117 uDf6S8 Irritable bowel syndrome_R8 || id:ebi-a-GCST90017117 Weighted median 12 0.0305642201648841 0.0945890726424914 0.746599568372893
ebi-a-GCST90017117 uDf6S8 Irritable bowel syndrome_R8 || id:ebi-a-GCST90017117 Inverse variance weighted 12 -0.0508711961595357 0.0729033858920447 0.485309026979658
ebi-a-GCST90017117 uDf6S8 Irritable bowel syndrome_R8 || id:ebi-a-GCST90017117 Simple mode 12 0.0785399557367198 0.165578524429044 0.644536443863129
ebi-a-GCST90017117 uDf6S8 Irritable bowel syndrome_R8 || id:ebi-a-GCST90017117 Weighted mode 12 0.0656117583469307 0.136696664376767 0.64064338151354
ebi-a-GCST90017118 uDf6S8 Irritable bowel syndrome_R8 || id:ebi-a-GCST90017118 MR Egger 12 -0.0957726919734299 0.204215705861848 0.649142478752816
ebi-a-GCST90017118 uDf6S8 Irritable bowel syndrome_R8 || id:ebi-a-GCST90017118 Weighted median 12 -0.0424874447210091 0.107129927026257 0.6916644100867
ebi-a-GCST90017118 uDf6S8 Irritable bowel syndrome_R8 || id:ebi-a-GCST90017118 Inverse variance weighted 12 0.000255565983457503 0.0750061834088015 0.997281400697262
ebi-a-GCST90017118 uDf6S8 Irritable bowel syndrome_R8 || id:ebi-a-GCST90017118 Simple mode 12 -0.104792317388822 0.183503282246503 0.579435456863541
ebi-a-GCST90017118 uDf6S8 Irritable bowel syndrome_R8 || id:ebi-a-GCST90017118 Weighted mode 12 -0.0982560540177539 0.152574206203587 0.532780509542393
